# Supplementary material for: Theoretical insight into dihydrogen activation with β-diketiminato ligand supported Group 13 and 14 elements: mechanism and activity difference
Source: Royal Society of Chemistry journal article supplement (doi:10.1039/d1nj02660g), 2021-01-01
Supplement: d1nj02660g1.pdf [file d1nj02660g1.pdf]

## Supporting Information

### Theoretical insight into dihydrogen activation with $\beta$ -diketiminato ligand supported Group 13 and 14 elements: mechanism and activity difference

*Weiye Li,<sup>\*a</sup> Cai-Qin Li,<sup>b</sup> Xiaoyan Zhang,<sup>a</sup> Chuanxi Xia,<sup>a</sup> and Geng Leng<sup>c</sup>*

<sup>a</sup> School of Science, Research Center for Advanced Computation, Xihua University, Chengdu, Sichuan, 610039, P. R. China.

<sup>b</sup> School of Chemistry and Chemical Engineering, Shanxi Datong University, Datong, 037009, China.

<sup>c</sup> School of Resources and Environment, University of Electronic Science and Technology of China, Chengdu, 611731, P. R. China

Corresponding author's E-mail address: [weiyili@mail.xhu.edu.cn](mailto:weiyili@mail.xhu.edu.cn);

#### CONTENTS:

|                                                                                                 |    |
|-------------------------------------------------------------------------------------------------|----|
| S1: Computational details.....                                                                  | 2  |
| S2: Testing the reliability of the present ONIOM approach.....                                  | 3  |
| S3: Activation-stain model analysis .....                                                       | 4  |
| S4: Intermolecular 1,4'-addition of dihydrogen with the [(BDI)Ga <sup>t</sup> Bu] complex. .... | 4  |
| S5: Mechanisms of dihydrogen activation with the BDI-ligated Group 14 elements. ....            | 5  |
| S6: Solvent effect on the reaction. ....                                                        | 9  |
| S7: Energy summary.....                                                                         | 10 |
| S8: Cartesian coordinates of the optimized structures involved in this work.....                | 14 |

## S1: Computational details.

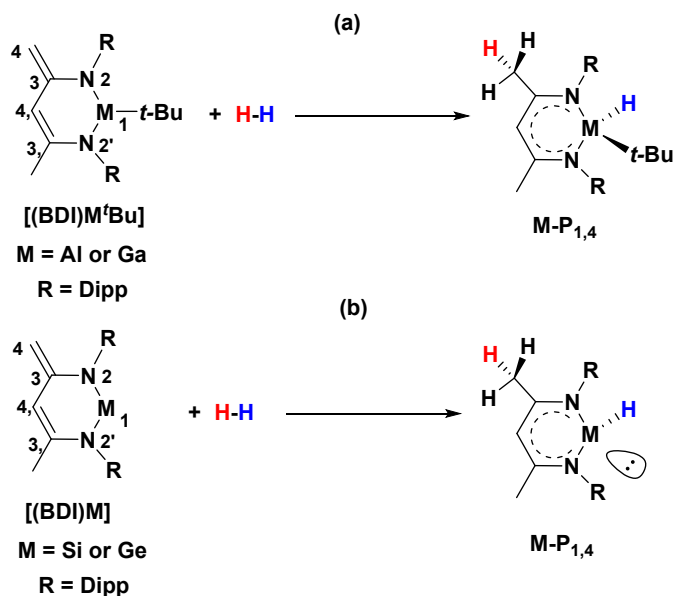

Optimization and frequency calculation in gas phase: ONIOM[M06-2X/6-31++G\*\*//HF/3-21G\*], the keyword “Int = ultrafine” was used.

Solvation Method: M06-2X/6-311++G\*\*

For single-point energy calculation, the SCRF = (benzene, SMD, ExternalIteration) keyword was used.

## S2: Testing the reliability of the present ONIOM approach

To probe the feasibility and reliability of the present ONIOM[M06-2X/6-31++G\*\*//HF/3-21G\*] the approach, the geometric optimization and free energy calculation for the bimoleculr 1,4-addition, 1,4'-addtion, termolecular 1,4-addition of H<sub>2</sub> with the [(BDI)Ga'Bu] complex were performed with a full DFT calculation using the Gen method, respetively. Similar to the ONION calculation, the core region was treated by the M06-2X functional with the 6-31++G\*\* basis set, while the rest region (two Dipp groups) was optimized at the M06-2X/3-21G\* level. Then, single-point energy in benzene solvent (experimentally used) was calculated at the M06-2X/6-311++G\*\* level on the M06-2X/Gen-optimized structures by using the continuum solvation model (SMD).

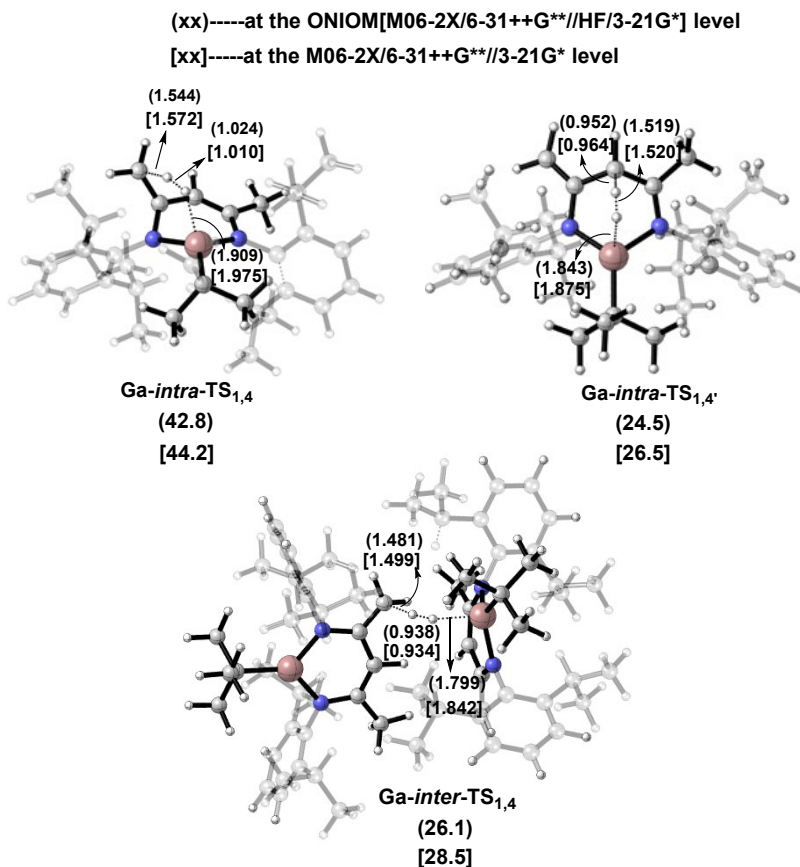

**Figure S1.** Optimized structures of the TSs for the bimolecular 1,4-addition, 1,4'-addtion, termoleculr 1,4-addition of H<sub>2</sub> with the [(BDI)Ga'Bu] complex using ONIOM and Gen method, respetively. The relative free energies (in kcal mol<sup>-1</sup>) are given below.

### S3: Activation-strain model analysis

**Table S1** Activation energy  $\Delta E^\ddagger$ , strain energy  $\Delta E_{\text{strain}}^\ddagger$  and interaction energies  $\Delta E_{\text{int}}^\ddagger$  (all in kcal mol<sup>-1</sup>) for the TSs along the activation of H<sub>2</sub> activation with the (BDI)Ga<sup>t</sup>Bu complex .

| Transition States           | $\Delta E_{\text{strain}}^\ddagger$ <sup>a</sup> |                |       | $\Delta E_{\text{int}}^\ddagger$ <sup>b</sup> | $\Delta E^\ddagger$ <sup>c</sup> |
|-----------------------------|--------------------------------------------------|----------------|-------|-----------------------------------------------|----------------------------------|
|                             | (BDI)Ga <sup>t</sup> Bu                          | H <sub>2</sub> | total |                                               |                                  |
| Ga-intra-TS <sub>1,4</sub>  | 33.1                                             | 20.3           | 53.4  | -16.6                                         | 36.8                             |
| Ga-intra-TS <sub>1,2'</sub> | 9.0                                              | 21.2           | 30.1  | -2.9                                          | 27.2                             |
| Ga-intra-TS <sub>1,4'</sub> | 20.3                                             | 12.8           | 33.1  | -15.7                                         | 17.4                             |
| Ga-inter-TS <sub>1,4</sub>  | 7.5, 9.5                                         | 11.5           | 28.4  | -22.6                                         | 5.9                              |
| Ga-inter-TS <sub>1,4'</sub> | 11.1, 14.1                                       | 23.0           | 48.7  | -32.5                                         | 16.2                             |

is the energy associated with deforming the reactants from their equilibrium geometry to the geometry they adopt in the TS;

<sup>b</sup> $\Delta E_{\text{int}}^\ddagger$  is the actual interaction energy between the deformed reactants in the TS;

<sup>c</sup> $\Delta E^\ddagger$  is the relative activation energy without zero-point energy correction.

### S4: Intermolecular 1,4'-addition of dihydrogen with the [(BDI)Ga<sup>t</sup>Bu] complex.

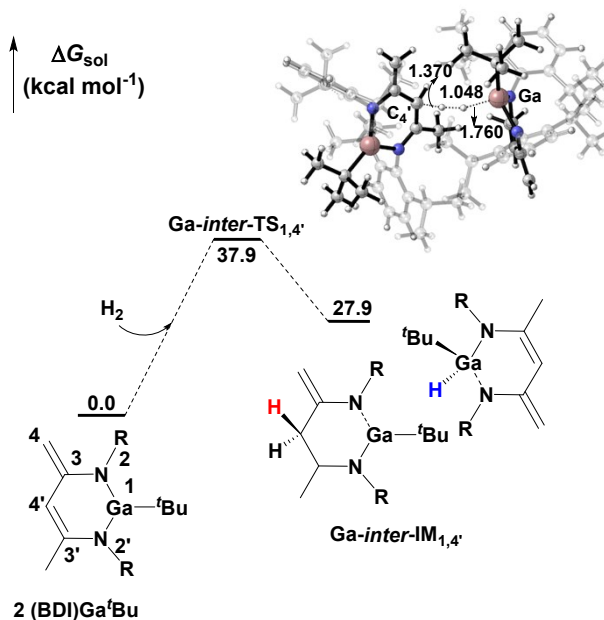

**Figure S2.** Computed free energy profile for intermolecular 1,4'-addition of H<sub>2</sub> with the [(BDI)Ga<sup>t</sup>Bu] complex. The critical bond distances in the selected key TS are labeled in Å.

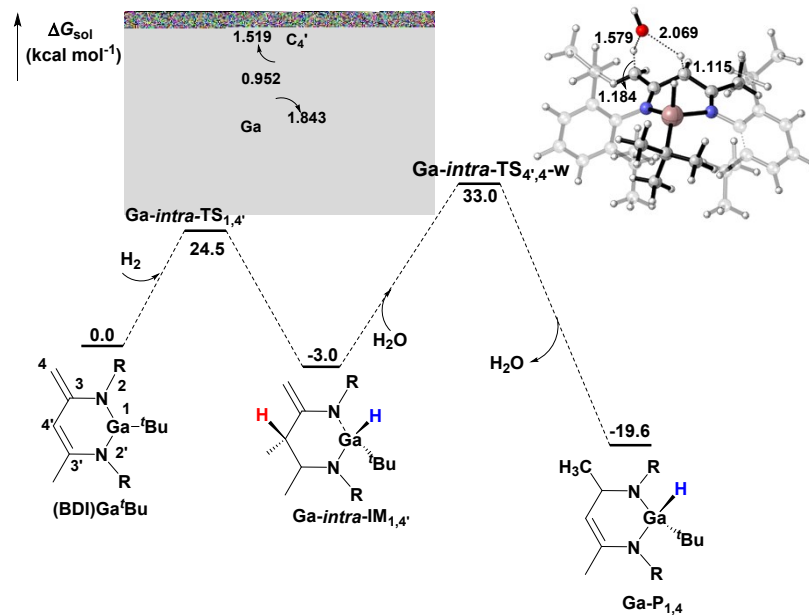

**Figure S3.** Computed free energy profile for water-assisted intermolecular 4',4-H-shift. The critical bond distances in the selected key TS are labeled in Å.

### S5: Mechanisms of dihydrogen activation with the BDI-ligated Group 14 elements.

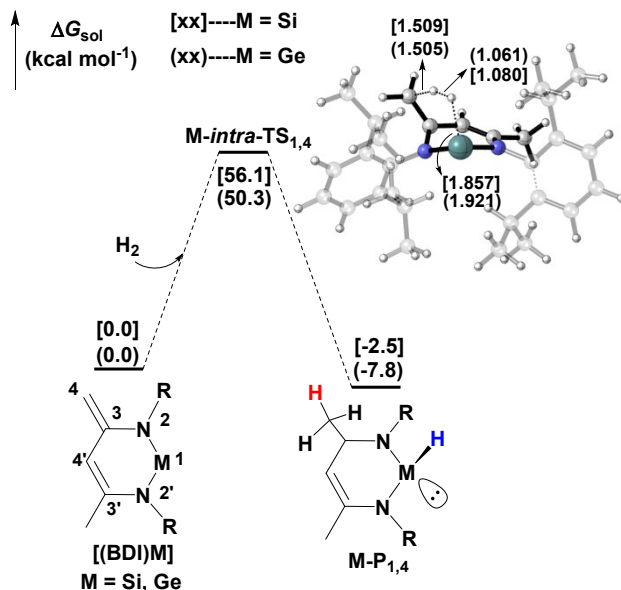

**Figure S4.** Computed free energy profile for intermolecular 1,4-addition of H<sub>2</sub> with the [(BDI)Si] and [(BDI)Ge] compounds. The critical bond distances in the selected key TS are labeled in Å.

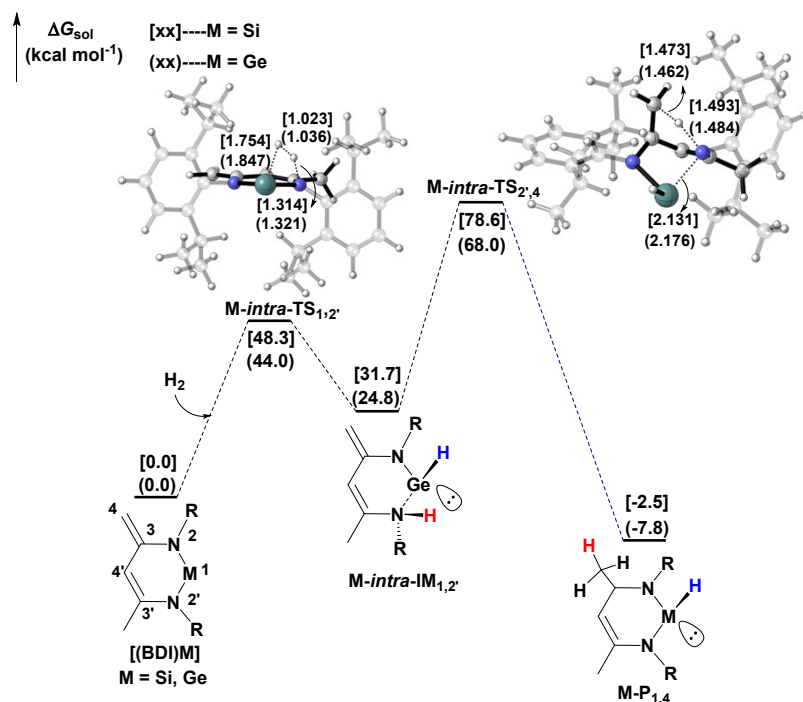

**Figure S5.** Computed free energy profile for the intramolecular 1,2'-addition of H<sub>2</sub> with the [(BDI)Si] and [(BDI)Ge] compounds, followed by the 2'4-H-shift. The critical bond distances in the selected key TS are labeled in Å.

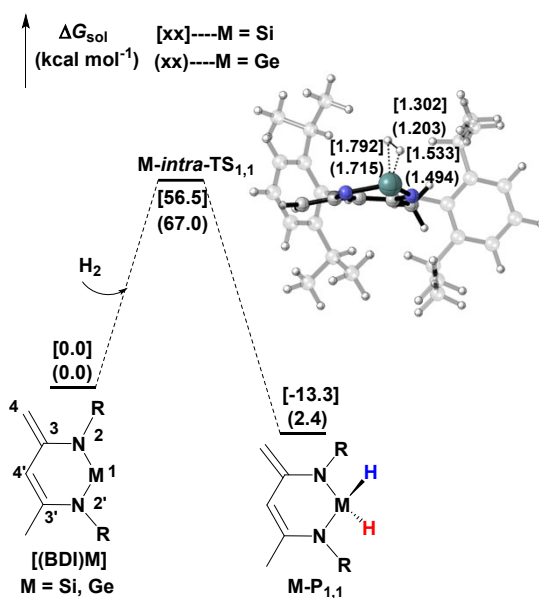

**Figure S6.** Computed free energy profile for the intramolecular 1,1'-addition of H<sub>2</sub> with the [(BDI)Si] and [(BDI)Ge] compounds. The critical bond distances in the selected key TS are labeled in Å.

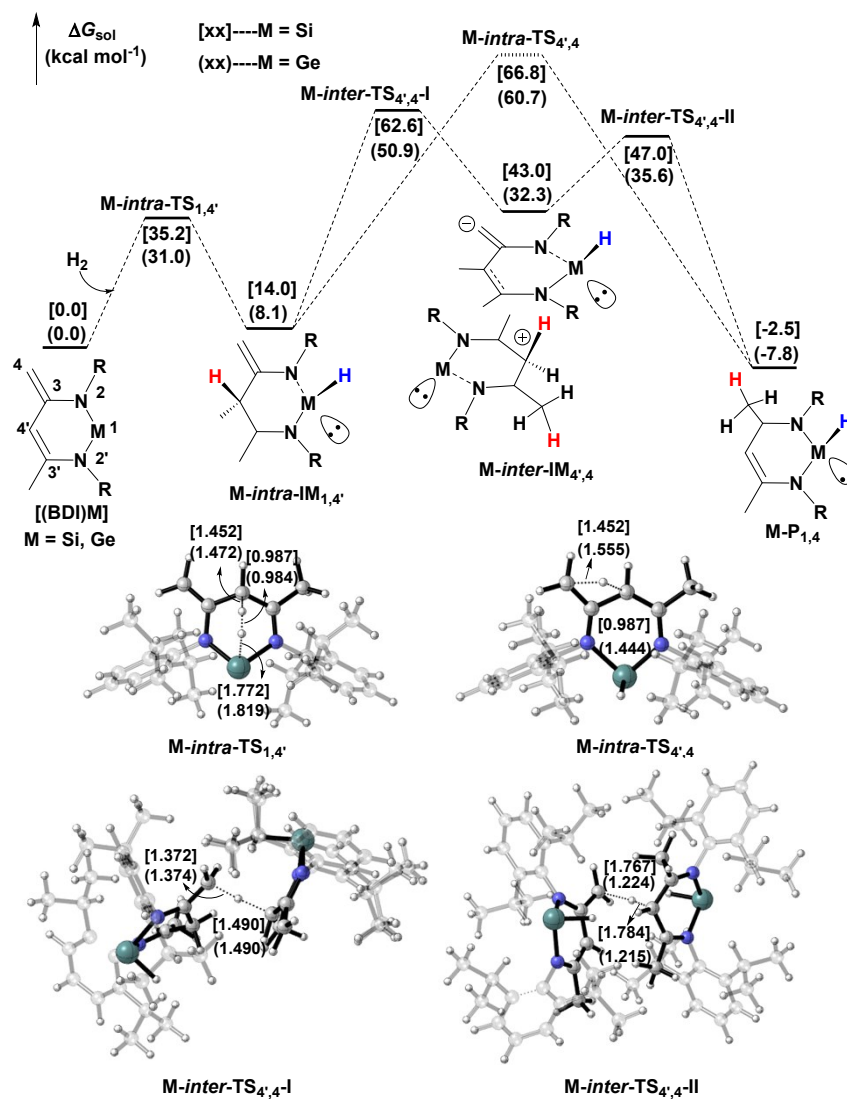

**Figure S7.** Computed free energy profile for the intramolecular 1,4'-addition of H<sub>2</sub> with the [(BDI)Si] and [(BDI)Ge] compounds, followed by the intramolecular/intermolecular 4'4'-H-shift. The critical bond distances in the selected key TS are labeled in Å.

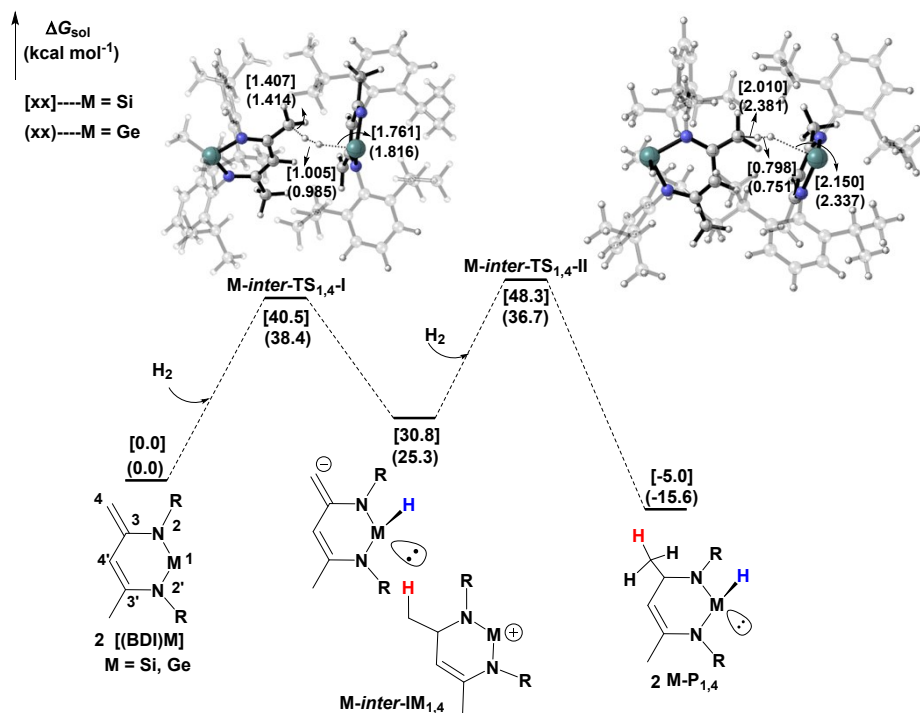

**Figure S8.** Computed free energy profile for the two successive intermolecular 1,4-addition of H<sub>2</sub> with the [(BDI)Si] and [(BDI)Ge] compounds. The critical bond distances in the selected key TS are labeled in Å.

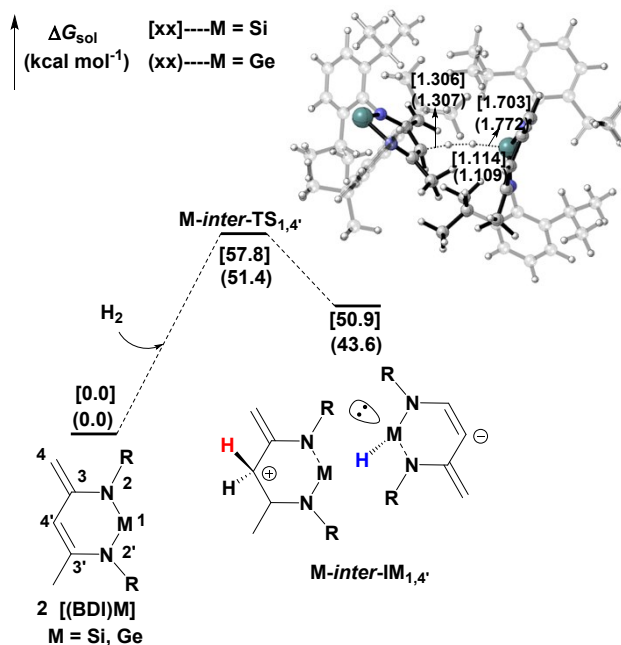

**Figure S9.** Computed free energy profile for the intermolecular 1,4'-addition of H<sub>2</sub> with the [(BDI)Si] and [(BDI)Ge] compounds. The critical bond distances in the selected key TS are labeled in Å.



## S6: Solvent effect on the reaction.

**Method I:** The initial optimization and frequency calculation at the ONIOM[M06-2X/6-31++G\*\*//HF/3-21G\*] in gas phase, followed by the single-point energy calculation at the M06-2X/6-311++G\*\* level in benzene solvent with the SMD solvation model.

**Method II:** The initial optimization and frequency calculation at the ONIOM[M06-2X/6-31++G\*\*//HF/3-21G\*] in benzene solvent, followed by the single-point energy calculation at the M06-2X/6-311++G\*\* level in benzene solvent with the SMD solvation model.

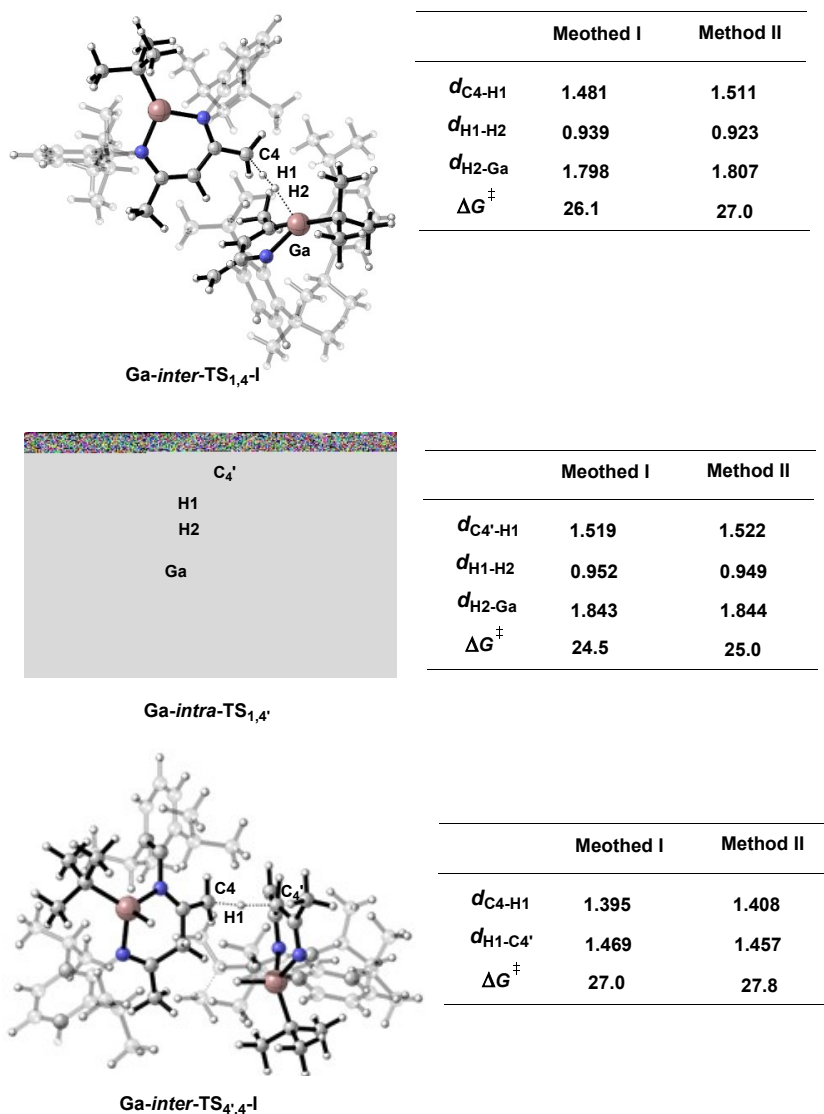

**Figure S10.** Optimized-structures of the crucial TSs in dihydrogen activation with the [(BDI)Ga<sup>+</sup>tBu] complex. The critical bond distances in the selected key TS are labeled in Å, and the free energy barriers are given in kcal mol<sup>-1</sup>.

## S7: Energy summary

**Table S2** Energies of the stationary points involved in H<sub>2</sub> activation with the [(BDI)Ga<sup>+</sup>Bu] complex.

|                                         | $H_c^a$ | $G_c^b$  | $E_{sol}^c$ | $\Delta H_{sol}^d$ | $\Delta G_{sol}^e$ |
|-----------------------------------------|---------|----------|-------------|--------------------|--------------------|
| H <sub>2</sub>                          | 0.01366 | -0.00112 | -1.16790    | -                  | -                  |
| (BDI)Ga <sup>+</sup> Bu                 | 0.82963 | 0.72342  | -3321.15598 | -                  | -                  |
| Ga- <i>intra</i> -TS <sub>1,4</sub>     | 0.84220 | 0.73194  | -3322.26529 | 36.1               | 42.8               |
| Ga-P <sub>1,4</sub>                     | 0.84874 | 0.73982  | -3322.37265 | -27.2              | -19.6              |
| Ga- <i>intra</i> -TS <sub>1,4'</sub>    | 0.84344 | 0.73362  | -3322.29621 | 17.5               | 24.5               |
| Ga- <i>intra</i> -IM <sub>1,4'</sub>    | 0.84918 | 0.73811  | -3322.34445 | -9.2               | -3.0               |
| Ga- <i>intra</i> -TS <sub>4',4</sub>    | 0.84316 | 0.73351  | -3322.25585 | 42.6               | 49.7               |
| Ga- <i>intra</i> -TS <sub>4',4'-w</sub> | 0.87255 | 0.75828  | -3398.72867 | 15.3               | 33.0               |
| Ga- <i>inter</i> -TS <sub>4',4-I</sub>  | 1.69615 | 1.49813  | -6644.66313 | -3.6               | 24.0               |
| Ga- <i>inter</i> -IM <sub>4',4</sub>    | 1.70055 | 1.49863  | -6644.68651 | -15.6              | 9.6                |
| Ga- <i>inter</i> -TS <sub>4',4-II</sub> | 1.69684 | 1.49843  | -6644.68005 | -13.8              | 13.5               |
| Ga- <i>intra</i> -TS <sub>1,2'</sub>    | 0.84446 | 0.73380  | -3322.28052 | 27.9               | 34.4               |
| Ga- <i>intra</i> -IM <sub>1,2'</sub>    | 0.85086 | 0.74047  | -3322.32200 | 5.9                | 12.6               |
| Ga- <i>intra</i> -TS <sub>2',4</sub>    | 0.84356 | 0.73562  | -3322.25780 | 41.6               | 49.8               |
| Ga- <i>inter</i> -TS <sub>1,4-I</sub>   | 1.67531 | 1.47803  | -6643.47050 | 7.4                | 26.1               |
| Ga- <i>inter</i> -IM <sub>1,4</sub>     | 1.68147 | 1.48134  | -6643.50325 | -9.3               | 7.7                |
| Ga- <i>inter</i> -TS <sub>1,4-II</sub>  | 1.69550 | 1.49929  | -6644.68017 | -14.7              | 14.0               |
| Ga- <i>inter</i> -TS <sub>1,4'</sub>    | 1.67495 | 1.47882  | -6643.45405 | 17.5               | 37.0               |
| Ga- <i>inter</i> -IM <sub>1,4'</sub>    | 1.68016 | 1.48206  | -6643.47171 | 9.7                | 27.9               |

*a:*  $H_c$  is the enthalpy correction calculated at the ONIOM[M06-2X/6-31++G\*\*//HF/3-21G\*] level in gas phase at 298 K;

*b:*  $G_c$  is the Gibbs free energy correction calculated at the ONIOM[M06-2X/6-31++G\*\*//HF/3-21G\*] level in gas phase at 298 K;

*c:*  $E_{sol}$  is the electron energy in the solvent after PCM correction calculated at the M06-2X/(SMD, benzene)//6-311++G(d, p) level;

*d:*  $\Delta H_{sol}$  is the relative enthalpy energy in the solvent at 298 K  $H_{sol} = H_c + E_{sol}$ .

*e:*  $\Delta G_{sol}$  is the relative Gibbs free energy in the solvent at 298 K.  $G_{sol} = G_c + E_{sol}$ .

**Table S3** Energies of the stationary points involved in H<sub>2</sub> activation with the [(BDI)Al<sup>t</sup>Bu] complex.

|                                         | $H_c$   | $G_c$   | $E_{\text{sol}}$ | $\Delta H_{\text{sol}}$ | $\Delta G_{\text{sol}}$ |
|-----------------------------------------|---------|---------|------------------|-------------------------|-------------------------|
| (BDI)Al <sup>t</sup> Bu                 | 0.83023 | 0.72015 | -1638.78151      | -                       | -                       |
| Al- <i>intra</i> -TS <sub>1,4</sub>     | 0.84272 | 0.73426 | -1639.89439      | 33.8                    | 44.1                    |
| Al-P <sub>1,4</sub>                     | 0.84962 | 0.73982 | -1640.00075      | -28.6                   | -19.2                   |
| Al- <i>intra</i> -TS <sub>1,4'</sub>    | 0.84369 | 0.73377 | -1639.92464      | 15.4                    | 24.8                    |
| Al- <i>intra</i> -IM <sub>1,4'</sub>    | 0.84931 | 0.73949 | -1639.96921      | -9.0                    | 0.4                     |
| Al- <i>intra</i> -TS <sub>4',4</sub>    | 0.84324 | 0.73419 | -1639.88056      | 42.8                    | 52.7                    |
| Al- <i>intra</i> -TS <sub>4',4'-w</sub> | 0.87262 | 0.75984 | -1716.34982      | 17.7                    | 38.7                    |
| Al- <i>inter</i> -TS <sub>4',4-I</sub>  | 1.69522 | 1.49854 | -3279.91516      | -5.6                    | 27.7                    |
| Al- <i>inter</i> -IM <sub>4',4</sub>    | 1.69977 | 1.49893 | -3279.93867      | -17.5                   | 13.2                    |
| Al- <i>inter</i> -TS <sub>4',4-II</sub> | 1.69695 | 1.49999 | -3279.92896      | -13.2                   | 20.0                    |
| Al- <i>intra</i> -TS <sub>1,2'</sub>    | 0.84488 | 0.73546 | -1639.91282      | 23.6                    | 33.3                    |
| Al- <i>intra</i> -IM <sub>1,2'</sub>    | 0.85057 | 0.74110 | -1639.94746      | 5.4                     | 15.1                    |
| Al- <i>intra</i> -TS <sub>2',4</sub>    | 0.84361 | 0.73663 | -1639.88161      | 42.4                    | 53.6                    |
| Al- <i>inter</i> -TS <sub>1,4-I</sub>   | 1.67516 | 1.47810 | -3278.72599      | 3.7                     | 27.5                    |
| Al- <i>inter</i> -IM <sub>1,4</sub>     | 1.68015 | 1.47813 | -3278.75338      | -10.3                   | 10.3                    |
| Al- <i>inter</i> -TS <sub>1,4-II</sub>  | 1.69652 | 1.50131 | -3279.93686      | -18.4                   | 15.8                    |
| Al- <i>inter</i> -TS <sub>1,4'</sub>    | 1.67477 | 1.48071 | -3278.70990      | 13.6                    | 39.3                    |
| Al- <i>inter</i> -IM <sub>1,4'</sub>    | 1.67968 | 1.48199 | -3278.72371      | 8.0                     | 31.4                    |

**Table S4** Energies of the stationary points involved in H<sub>2</sub> activation with the [(BDI)Si] complex.

|                                                          | $H_c$   | $G_c$   | $E_{sol}$    | $\Delta H_{sol}$ | $\Delta G_{sol}$ |
|----------------------------------------------------------|---------|---------|--------------|------------------|------------------|
| [(BDI)Si]                                                | 0.70083 | 0.60241 |              | -                | -                |
| Si- <i>intra</i> - <b>TS</b> <sub>1,4</sub>              | 0.71364 | 0.61678 | -1529.08512  | 45.9             | 56.1             |
| Si- <b>P</b> <sub>1,4</sub>                              | 0.72182 | 0.62250 | -1529.184303 | -11.2            | -2.5             |
| Si- <i>intra</i> - <b>TS</b> <sub>1,4'</sub>             | 0.71530 | 0.61785 | -1529.119587 | 25.3             | 35.2             |
| Si- <i>intra</i> - <b>IM</b> <sub>1,4'</sub>             | 0.72096 | 0.62123 | -1529.156735 | 5.5              | 14.0             |
| Si- <i>intra</i> - <b>TS</b> <sub>4',4</sub>             | 0.71513 | 0.61802 | -1529.069388 | 56.7             | 66.8             |
| Si- <i>inter</i> - <b>TS</b> <sub>4',4</sub> - <b>I</b>  | 1.43829 | 1.26276 | -3058.278638 | 30.7             | 62.6             |
| Si- <i>inter</i> - <b>IM</b> <sub>4',4</sub>             | 1.44291 | 1.26590 | -3058.312993 | 12.0             | 43.0             |
| Si- <i>inter</i> - <b>TS</b> <sub>4',4</sub> - <b>II</b> | 1.43958 | 1.26588 | -3058.306584 | 13.9             | 47.0             |
| Si- <i>intra</i> - <b>TS</b> <sub>1,2'</sub>             | 0.71530 | 0.61785 | -1529.119587 | 25.3             | 35.2             |
| Si- <i>intra</i> - <b>IM</b> <sub>1,2'</sub>             | 0.72096 | 0.62123 | -1529.156735 | 5.5              | 14.0             |
| Si- <i>intra</i> - <b>TS</b> <sub>2',4</sub>             | 0.71513 | 0.61802 | -1529.069388 | 56.7             | 66.8             |
| Si- <i>intra</i> - <b>TS</b> <sub>1,1</sub>              | 0.71512 | 0.61738 | -1529.085097 | 46.8             | 56.5             |
| Si- <b>P</b> <sub>1,1</sub>                              | 0.71834 | 0.61993 | -1529.198947 | -22.6            | -13.3            |
| Si- <i>inter</i> - <b>TS</b> <sub>1,4</sub> - <b>I</b>   | 1.41677 | 1.24306 | -3057.125187 | 16.7             | 40.5             |
| Si- <i>inter</i> - <b>IM</b> <sub>1,4</sub>              | 1.42243 | 1.24541 | -3057.142906 | 9.1              | 30.8             |
| Si- <i>inter</i> - <b>TS</b> <sub>1,4</sub> - <b>II</b>  | 1.43829 | 1.26369 | -3058.301704 | 16.2             | 48.7             |
| Si- <i>inter</i> - <b>TS</b> <sub>1,4'</sub>             | 1.41640 | 1.24327 | -3057.097821 | 33.6             | 57.8             |
| Si- <i>inter</i> - <b>IM</b> <sub>1,4'</sub>             | 1.42159 | 1.24495 | -3057.110493 | 28.9             | 50.9             |

**Table S5** Energies of the stationary points involved in H<sub>2</sub> activation with the [(BDI)Ge] complex.

|                                              | $H_c$   | $G_c$   | $E_{sol}$    | $\Delta H_{sol}$ | $\Delta G_{sol}$ |
|----------------------------------------------|---------|---------|--------------|------------------|------------------|
| [(BDI)Ge]                                    | 0.70097 | 0.60217 |              | -                | -                |
| Ge- <i>intra</i> -TS <sub>1,4</sub>          | 0.71338 | 0.61503 | -3316.584038 | 40.8             | 50.3             |
| Ge- <b>P</b> <sub>1,4</sub>                  | 0.72182 | 0.62222 | -3316.683806 | -16.5            | -7.8             |
| Ge- <i>intra</i> -TS <sub>1,4'</sub>         | 0.71499 | 0.61596 | -3316.615778 | 21.9             | 31.0             |
| Ge- <i>intra</i> - <b>IM</b> <sub>1,4'</sub> | 0.72078 | 0.62002 | -3316.656343 | 0.0              | 8.1              |
| Ge- <i>intra</i> -TS <sub>4',4</sub>         | 0.71474 | 0.61620 | -3316.568667 | 51.3             | 60.7             |
| Ge- <i>inter</i> -TS <sub>4',4-I</sub>       | 1.43816 | 1.26062 | -6633.277934 | 19.8             | 50.9             |
| Ge- <i>inter</i> - <b>IM</b> <sub>4',4</sub> | 1.44289 | 1.26514 | -6633.311866 | 1.4              | 32.4             |
| Ge- <i>inter</i> -TS <sub>4',4-II</sub>      | 1.43962 | 1.26397 | -6633.305674 | 3.3              | 35.6             |
| Ge- <i>intra</i> -TS <sub>1,2'</sub>         | 0.71549 | 0.61753 | -3316.59662  | 34.2             | 44.0             |
| Ge- <i>intra</i> - <b>IM</b> <sub>1,2'</sub> | 0.72256 | 0.62432 | -3316.634016 | 15.2             | 24.8             |
| Ge- <i>intra</i> -TS <sub>2',4</sub>         | 0.71497 | 0.61731 | -3316.558075 | 58.1             | 68.0             |
| Ge- <i>intra</i> -TS <sub>1,1</sub>          | 0.71460 | 0.61512 | -3316.557569 | 58.1             | 67.0             |
| Ge- <b>P</b> <sub>1,1</sub>                  | 0.71870 | 0.61877 | -3316.664196 | -6.2             | 2.4              |
| Ge- <i>inter</i> -TS <sub>1,4-I</sub>        | 1.41740 | 1.24394 | -6632.112095 | 14.0             | 38.4             |
| Ge- <i>inter</i> - <b>IM</b> <sub>1,4</sub>  | 1.42310 | 1.24428 | -6632.133278 | 4.3              | 25.3             |
| Ge- <i>inter</i> -TS <sub>1,4-II</sub>       | 1.43869 | 1.26215 | -6633.302041 | 5.0              |                  |
| Ge- <i>inter</i> -TS <sub>1,4'</sub>         | 1.41753 | 1.24218 | -6632.089575 | 28.2             | 51.4             |
| Ge- <i>inter</i> - <b>IM</b> <sub>1,4'</sub> | 1.42187 | 1.24322 | -6632.103067 | 22.5             | 43.6             |

## S8: Cartesian coordinates of the optimized structures involved in this work

H<sub>2</sub>

|   |             |             |              |    |              |              |              |
|---|-------------|-------------|--------------|----|--------------|--------------|--------------|
| 1 | 0.000000000 | 0.000000000 | 0.369040000  | 1  | -3.132322000 | -0.879796000 | 2.866696000  |
| 1 | 0.000000000 | 0.000000000 | -0.369040000 | 1  | -2.212454000 | -0.002428000 | 4.102065000  |
|   |             |             |              | 1  | -5.164989000 | -2.112992000 | -0.981390000 |
|   |             |             |              | 1  | -6.200333000 | 0.005787000  | -1.615204000 |
|   |             |             |              | 1  | -5.159445000 | 2.121076000  | -0.978826000 |
|   |             |             |              | 6  | 0.808905000  | 1.232161000  | -2.833614000 |
|   |             |             |              | 1  | -1.955117000 | 0.877840000  | -2.708935000 |
|   |             |             |              | 1  | -1.956815000 | -0.877539000 | -2.708777000 |
|   |             |             |              | 6  | -1.368560000 | -0.000451000 | -2.986178000 |
|   |             |             |              | 6  | 0.806629000  | -1.237306000 | -2.832627000 |
|   |             |             |              | 1  | 0.855678000  | -1.232217000 | -3.931847000 |
|   |             |             |              | 1  | 0.337359000  | -2.179780000 | -2.536265000 |
|   |             |             |              | 1  | 1.831676000  | -1.228165000 | -2.455769000 |
|   |             |             |              | 31 | -0.036971000 | -0.001326000 | -0.376440000 |
|   |             |             |              | 6  | 2.764505000  | -2.569078000 | 0.238789000  |
|   |             |             |              | 1  | 1.699679000  | -2.408920000 | 0.318770000  |
|   |             |             |              | 6  | 2.759109000  | 2.569073000  | 0.235450000  |
|   |             |             |              | 1  | 1.694387000  | 2.407123000  | 0.313357000  |
|   |             |             |              | 6  | 3.267628000  | -3.140698000 | 1.584926000  |
|   |             |             |              | 1  | 4.340951000  | -3.292647000 | 1.543056000  |
|   |             |             |              | 1  | 3.039358000  | -2.465812000 | 2.395526000  |
|   |             |             |              | 1  | 2.794795000  | -4.097886000 | 1.783528000  |
|   |             |             |              | 6  | 3.016244000  | -3.613685000 | -0.872471000 |
|   |             |             |              | 1  | 2.406648000  | -4.491520000 | -0.684442000 |
|   |             |             |              | 1  | 2.768788000  | -3.229017000 | -1.852673000 |
|   |             |             |              | 1  | 4.051352000  | -3.933260000 | -0.881638000 |
|   |             |             |              | 6  | 3.258518000  | 3.141924000  | 1.582449000  |
|   |             |             |              | 1  | 4.331641000  | 3.295822000  | 1.542552000  |
|   |             |             |              | 1  | 2.783551000  | 4.098293000  | 1.779912000  |
|   |             |             |              | 1  | 3.030018000  | 2.466785000  | 2.392772000  |
|   |             |             |              | 6  | 3.011115000  | 3.613885000  | -0.875546000 |
|   |             |             |              | 1  | 2.766905000  | 3.228341000  | -1.856227000 |
|   |             |             |              | 1  | 2.399031000  | 4.490353000  | -0.689236000 |
|   |             |             |              | 1  | 4.045485000  | 3.935898000  | -0.882295000 |
|   |             |             |              | 6  | -2.846056000 | -2.544123000 | 0.374006000  |

|                                              |              |              |              |    |              |              |              |
|----------------------------------------------|--------------|--------------|--------------|----|--------------|--------------|--------------|
| 1                                            | -2.075377000 | -2.330651000 | 1.098147000  | 6  | -4.692114000 | 1.198313000  | -0.709033000 |
| 6                                            | -2.179338000 | -3.258090000 | -0.819563000 | 6  | -3.475801000 | 1.217674000  | -0.040493000 |
| 1                                            | -2.894575000 | -3.428772000 | -1.615914000 | 6  | 0.024409000  | -0.001202000 | -2.367755000 |
| 1                                            | -1.369936000 | -2.657035000 | -1.211840000 | 1  | -1.278116000 | -0.000825000 | -4.088454000 |
| 1                                            | -1.769644000 | -4.214294000 | -0.511104000 | 1  | 0.335629000  | 2.176328000  | -2.549219000 |
| 6                                            | -3.880578000 | -3.475828000 | 1.040825000  | 1  | 0.840708000  | 1.227342000  | -3.948165000 |
| 1                                            | -3.379690000 | -4.351797000 | 1.439091000  | 1  | 1.828918000  | 1.221060000  | -2.482394000 |
| 1                                            | -4.388711000 | -2.972396000 | 1.854902000  | 1  | -0.051436000 | -0.001051000 | 3.825938000  |
| 1                                            | -4.625297000 | -3.814086000 | 0.330460000  | 1  | 5.231042000  | -2.113310000 | -0.748485000 |
| 6                                            | -2.839108000 | 2.544371000  | 0.377021000  | 1  | 6.366450000  | 0.001483000  | -1.183419000 |
| 1                                            | -2.070212000 | 2.328049000  | 1.102217000  | 1  | 5.228925000  | 2.115313000  | -0.749224000 |
| 6                                            | -2.168143000 | 3.256535000  | -0.815246000 | 1  | 3.372298000  | 0.000299000  | 2.692943000  |
| 1                                            | -1.755615000 | 4.211202000  | -0.505808000 | 1  | 2.159604000  | -0.000073000 | 4.094757000  |
| 1                                            | -1.360188000 | 2.652894000  | -1.206560000 | 1  | -3.130514000 | 0.877522000  | 2.878477000  |
| 1                                            | -2.881578000 | 3.429924000  | -1.612626000 | 1  | -3.130637000 | -0.879605000 | 2.878544000  |
| 6                                            | -3.871351000 | 3.479382000  | 1.042703000  | 1  | -2.205742000 | -0.001060000 | 4.107191000  |
| 1                                            | -4.613649000 | 3.820852000  | 0.331342000  | 1  | -5.184064000 | -2.114216000 | -0.955943000 |
| 1                                            | -4.382644000 | 2.977274000  | 1.855621000  | 1  | -6.224415000 | 0.004042000  | -1.582581000 |
| 1                                            | -3.367922000 | 4.353254000  | 1.442362000  | 1  | -5.179470000 | 2.119942000  | -0.955532000 |
|                                              |              |              |              | 6  | 0.799794000  | 1.232094000  | -2.848206000 |
|                                              |              |              |              | 1  | -1.960738000 | 0.878320000  | -2.716947000 |
|                                              |              |              |              | 1  | -1.961191000 | -0.879574000 | -2.716944000 |
|                                              |              |              |              | 6  | -1.373712000 | -0.000778000 | -2.991580000 |
|                                              |              |              |              | 6  | 0.798763000  | -1.235474000 | -2.847370000 |
|                                              |              |              |              | 1  | 0.839297000  | -1.231779000 | -3.947343000 |
|                                              |              |              |              | 1  | 0.334247000  | -2.179198000 | -2.547296000 |
|                                              |              |              |              | 1  | 1.828027000  | -1.224575000 | -2.481924000 |
|                                              |              |              |              | 31 | -0.040963000 | -0.000813000 | -0.383124000 |
|                                              |              |              |              | 6  | 2.769237000  | -2.572071000 | 0.238700000  |
|                                              |              |              |              | 1  | 1.705019000  | -2.412524000 | 0.326889000  |
|                                              |              |              |              | 6  | 2.766653000  | 2.571919000  | 0.237771000  |
|                                              |              |              |              | 1  | 1.702568000  | 2.411366000  | 0.325728000  |
|                                              |              |              |              | 6  | 3.284188000  | -3.158068000 | 1.573669000  |
|                                              |              |              |              | 1  | 4.357002000  | -3.313391000 | 1.523068000  |
|                                              |              |              |              | 1  | 3.066868000  | -2.493722000 | 2.396893000  |
|                                              |              |              |              | 1  | 2.811513000  | -4.116421000 | 1.769113000  |
|                                              |              |              |              | 6  | 3.013236000  | -3.606126000 | -0.883422000 |
|                                              |              |              |              | 1  | 2.399355000  | -4.483479000 | -0.704382000 |
| [(BDI)Ga <sup>t</sup> Bu] in benzene solvent |              |              |              |    |              |              |              |
| 7                                            | -1.505375000 | -0.001337000 | 0.790882000  |    |              |              |              |
| 6                                            | -1.287192000 | -0.001151000 | 2.170651000  |    |              |              |              |
| 6                                            | -0.056800000 | -0.001011000 | 2.741313000  |    |              |              |              |
| 6                                            | 1.295429000  | -0.000588000 | 2.168224000  |    |              |              |              |
| 7                                            | 1.434429000  | -0.000622000 | 0.766112000  |    |              |              |              |
| 6                                            | 2.778821000  | -0.000670000 | 0.219246000  |    |              |              |              |
| 6                                            | 3.427668000  | -1.218996000 | -0.044513000 |    |              |              |              |
| 6                                            | 4.720807000  | -1.192770000 | -0.550148000 |    |              |              |              |
| 6                                            | 5.365527000  | 0.001050000  | -0.797683000 |    |              |              |              |
| 6                                            | 4.719630000  | 1.194327000  | -0.550534000 |    |              |              |              |
| 6                                            | 3.426482000  | 1.219420000  | -0.044907000 |    |              |              |              |
| 6                                            | 2.344875000  | -0.000092000 | 3.027193000  |    |              |              |              |
| 6                                            | -2.505338000 | -0.001077000 | 3.058127000  |    |              |              |              |
| 6                                            | -2.847708000 | 0.000210000  | 0.247172000  |    |              |              |              |
| 6                                            | -3.478419000 | -1.215830000 | -0.040741000 |    |              |              |              |
| 6                                            | -4.694700000 | -1.193714000 | -0.709260000 |    |              |              |              |
| 6                                            | -5.288923000 | 0.002979000  | -1.057936000 |    |              |              |              |

|                                  |              |              |              |   |              |              |              |
|----------------------------------|--------------|--------------|--------------|---|--------------|--------------|--------------|
| 1                                | 2.765140000  | -3.212237000 | -1.860151000 | 6 | -1.226600000 | -0.139679000 | 2.038251000  |
| 1                                | 4.046623000  | -3.931775000 | -0.899940000 | 7 | -1.475709000 | 0.018298000  | 0.699296000  |
| 6                                | 3.280697000  | 3.158810000  | 1.572695000  | 6 | -2.837596000 | 0.301817000  | 0.247316000  |
| 1                                | 4.353351000  | 3.315297000  | 1.522254000  | 6 | -3.138555000 | 1.671194000  | 0.113457000  |
| 1                                | 2.806933000  | 4.116691000  | 1.767807000  | 6 | -2.092889000 | 2.744627000  | 0.400789000  |
| 1                                | 3.063960000  | 2.494426000  | 2.396045000  | 6 | -2.397369000 | 3.442563000  | 1.744125000  |
| 6                                | 3.009900000  | 3.605876000  | -0.884597000 | 6 | -1.998986000 | 3.781724000  | -0.738465000 |
| 1                                | 2.762196000  | 3.211525000  | -1.861242000 | 6 | -4.411502000 | 2.057554000  | -0.265696000 |
| 1                                | 2.395287000  | 4.482775000  | -0.705831000 | 6 | -5.387479000 | 1.119683000  | -0.531403000 |
| 1                                | 4.043026000  | 3.932357000  | -0.901113000 | 6 | -5.083532000 | -0.217129000 | -0.432312000 |
| 6                                | -2.853877000 | -2.545369000 | 0.383877000  | 6 | -3.818207000 | -0.656231000 | -0.051947000 |
| 1                                | -2.108737000 | -2.335178000 | 1.135060000  | 6 | -3.596738000 | -2.169469000 | -0.018515000 |
| 6                                | -2.140862000 | -3.228222000 | -0.800171000 | 6 | -4.535053000 | -2.872959000 | 0.993052000  |
| 1                                | -2.830884000 | -3.408700000 | -1.616835000 | 6 | -3.859504000 | -2.794299000 | -1.411304000 |
| 1                                | -1.335214000 | -2.604712000 | -1.164860000 | 6 | -1.924816000 | -1.086986000 | 2.785060000  |
| 1                                | -1.715994000 | -4.178469000 | -0.491887000 | 6 | 2.354351000  | 1.148475000  | 2.776407000  |
| 6                                | -3.891298000 | -3.505532000 | 1.002086000  | 6 | 2.779398000  | 0.258714000  | 0.119435000  |
| 1                                | -3.385172000 | -4.375533000 | 1.408121000  | 6 | 3.081539000  | 1.376928000  | -0.667887000 |
| 1                                | -4.439367000 | -3.026894000 | 1.805822000  | 6 | 4.327434000  | 1.449137000  | -1.275203000 |
| 1                                | -4.603374000 | -3.854023000 | 0.263321000  | 6 | 5.255723000  | 0.441694000  | -1.116916000 |
| 6                                | -2.848706000 | 2.545883000  | 0.384520000  | 6 | 4.955810000  | -0.650862000 | -0.329124000 |
| 1                                | -2.103085000 | 2.334035000  | 1.134742000  | 6 | 3.727420000  | -0.757215000 | 0.305719000  |
| 6                                | -2.135999000 | 3.228738000  | -0.799732000 | 6 | 3.439806000  | -1.973402000 | 1.187717000  |
| 1                                | -1.709576000 | 4.178183000  | -0.491133000 | 6 | 4.556864000  | -2.204040000 | 2.229627000  |
| 1                                | -1.331534000 | 2.604485000  | -1.165797000 | 6 | 3.249700000  | -3.246283000 | 0.334180000  |
| 1                                | -2.826585000 | 3.410767000  | -1.615571000 | 6 | 2.087417000  | 2.521112000  | -0.859440000 |
| 6                                | -3.884127000 | 3.506935000  | 1.004702000  | 6 | 1.803347000  | 2.802450000  | -2.351538000 |
| 1                                | -4.596824000 | 3.856628000  | 0.267108000  | 6 | 2.602940000  | 3.815227000  | -0.188668000 |
| 1                                | -4.431638000 | 3.028418000  | 1.808892000  | 6 | 0.133681000  | -1.443199000 | -2.055835000 |
| 1                                | -3.376428000 | 4.376091000  | 1.410583000  | 1 | 1.451349000  | -1.564113000 | -3.760427000 |
|                                  |              |              |              | 1 | -0.339630000 | -3.195010000 | -3.247580000 |
|                                  |              |              |              | 1 | -1.207520000 | -3.155961000 | -1.706074000 |
|                                  |              |              |              | 1 | 0.503466000  | -3.574112000 | -1.741042000 |
|                                  |              |              |              | 1 | -0.022604000 | 0.545896000  | 3.678829000  |
|                                  |              |              |              | 1 | -1.141868000 | 2.249229000  | 0.485265000  |
|                                  |              |              |              | 1 | -1.635114000 | 4.182583000  | 1.967049000  |
|                                  |              |              |              | 1 | -3.358999000 | 3.942519000  | 1.704342000  |
|                                  |              |              |              | 1 | -2.419495000 | 2.721625000  | 2.552285000  |
| <i>Ga-intra-TS<sub>1,4</sub></i> |              |              |              |   |              |              |              |
| 1                                | -0.967246000 | -1.939967000 | 1.925206000  |   |              |              |              |
| 1                                | -0.368868000 | -2.222828000 | 1.144195000  |   |              |              |              |
| 31                               | 0.042446000  | -0.877363000 | -0.146660000 |   |              |              |              |
| 7                                | 1.464030000  | 0.117867000  | 0.708078000  |   |              |              |              |
| 6                                | 1.227944000  | 0.525818000  | 1.993918000  |   |              |              |              |
| 6                                | 0.015365000  | 0.365068000  | 2.610746000  |   |              |              |              |







|   |              |              |              |    |              |              |              |
|---|--------------|--------------|--------------|----|--------------|--------------|--------------|
| 6 | -2.256178000 | -0.097603000 | 3.017756000  | 1  | -2.009537000 | -0.200867000 | 4.066684000  |
| 6 | 2.387986000  | 0.014239000  | 3.048311000  | 1  | 2.523968000  | -0.889183000 | 3.649465000  |
| 6 | 2.800514000  | 0.260918000  | 0.178121000  | 1  | 3.335405000  | 0.281508000  | 2.588121000  |
| 6 | 3.042087000  | 1.535405000  | -0.348149000 | 1  | 2.086682000  | 0.814169000  | 3.730783000  |
| 6 | 4.286151000  | 1.802518000  | -0.896292000 | 1  | 4.492987000  | 2.771251000  | -1.299368000 |
| 6 | 5.266024000  | 0.830749000  | -0.940439000 | 1  | 6.221470000  | 1.052182000  | -1.373388000 |
| 6 | 5.012188000  | -0.424342000 | -0.433855000 | 1  | 5.774700000  | -1.174785000 | -0.481262000 |
| 6 | 3.783509000  | -0.733273000 | 0.136150000  | 1  | 2.622436000  | -2.166519000 | 1.211001000  |
| 6 | 3.553125000  | -2.147207000 | 0.668607000  | 1  | 4.419662000  | -3.557069000 | 2.065123000  |
| 6 | 4.674520000  | -2.595978000 | 1.631372000  | 1  | 5.617244000  | -2.708031000 | 1.110111000  |
| 6 | 3.428951000  | -3.146475000 | -0.501574000 | 1  | 4.812918000  | -1.883201000 | 2.435108000  |
| 6 | 1.962141000  | 2.612847000  | -0.302913000 | 1  | 3.258848000  | -4.149232000 | -0.123938000 |
| 6 | 2.073317000  | 3.636004000  | -1.451496000 | 1  | 2.598319000  | -2.879250000 | -1.139855000 |
| 6 | 2.006390000  | 3.349266000  | 1.054436000  | 1  | 4.333455000  | -3.151977000 | -1.098359000 |
| 6 | 0.022206000  | -0.898507000 | -2.334733000 | 1  | 1.005823000  | 2.119546000  | -0.388588000 |
| 1 | 1.290234000  | -0.477331000 | -4.035080000 | 1  | 1.200579000  | 4.277790000  | -1.445280000 |
| 1 | -0.177415000 | -2.462754000 | -3.823457000 | 1  | 2.126966000  | 3.143573000  | -2.415286000 |
| 1 | -1.033939000 | -2.825653000 | -2.318598000 | 1  | 2.945604000  | 4.268496000  | -1.336152000 |
| 1 | 0.724412000  | -2.978388000 | -2.393801000 | 1  | 1.231755000  | 4.107537000  | 1.099240000  |
| 1 | 0.085006000  | -0.928907000 | 3.590894000  | 1  | 1.852258000  | 2.660761000  | 1.874009000  |
| 1 | -1.192074000 | 2.149824000  | 0.590413000  | 1  | 2.969436000  | 3.830858000  | 1.182659000  |
| 1 | -1.877704000 | 4.186422000  | 1.834881000  | 6  | -0.125241000 | -2.374746000 | -2.727954000 |
| 1 | -3.555760000 | 3.891619000  | 1.399752000  | 1  | 2.212395000  | -0.856860000 | -2.572561000 |
| 1 | -2.702973000 | 2.756274000  | 2.443281000  | 1  | 1.443034000  | 0.718355000  | -2.742531000 |
| 1 | -1.178684000 | 4.317850000  | -0.596747000 | 6  | 1.317545000  | -0.349372000 | -2.941974000 |
| 1 | -2.843058000 | 4.091182000  | -1.093240000 | 6  | -1.157343000 | -0.107393000 | -2.915527000 |
| 1 | -1.594227000 | 3.029447000  | -1.720870000 | 1  | -1.140746000 | -0.176717000 | -4.013894000 |
| 1 | -4.646290000 | 2.863057000  | -0.585260000 | 1  | -1.103751000 | 0.953359000  | -2.652613000 |
| 1 | -6.291305000 | 1.124835000  | -1.080925000 | 1  | -2.125389000 | -0.479371000 | -2.571268000 |
| 1 | -5.723017000 | -1.225742000 | -0.743303000 | 1  | 0.166622000  | -1.879469000 | 1.565331000  |
| 1 | -2.388900000 | -2.429439000 | 0.352428000  | 1  | 0.221603000  | -2.235168000 | 0.683469000  |
| 1 | -3.985248000 | -3.899663000 | 1.556639000  |    |              |              |              |
| 1 | -5.277269000 | -2.745142000 | 1.252515000  |    |              |              |              |
| 1 | -3.917455000 | -2.296020000 | 2.279296000  | 31 | 0.000369000  | -0.718932000 | -0.366560000 |
| 1 | -3.464523000 | -4.202497000 | -0.925676000 | 7  | 1.482518000  | -0.041039000 | 0.723018000  |
| 1 | -4.873930000 | -3.209766000 | -1.234581000 | 6  | 1.285009000  | -0.215551000 | 2.036212000  |
| 1 | -3.337584000 | -2.793760000 | -1.972892000 | 6  | 0.052535000  | -0.713672000 | 2.517625000  |
| 1 | -3.266905000 | 0.180114000  | 2.753751000  | 6  | -1.306389000 | -0.289445000 | 2.071569000  |

Ga-intra-TS<sub>1,4'</sub> in benzene

|   |              |              |              |   |              |              |              |
|---|--------------|--------------|--------------|---|--------------|--------------|--------------|
| 7 | -1.484447000 | -0.171562000 | 0.696208000  | 1 | -2.875920000 | 4.053783000  | -1.217918000 |
| 6 | -2.804900000 | 0.166330000  | 0.211540000  | 1 | -1.607201000 | 2.992390000  | -1.805238000 |
| 6 | -3.139188000 | 1.509892000  | -0.009911000 | 1 | -4.672426000 | 2.848921000  | -0.642467000 |
| 6 | -2.152320000 | 2.636595000  | 0.278644000  | 1 | -6.322171000 | 1.095833000  | -1.065760000 |
| 6 | -2.615962000 | 3.471158000  | 1.492316000  | 1 | -5.746503000 | -1.244702000 | -0.664858000 |
| 6 | -1.953367000 | 3.554382000  | -0.945771000 | 1 | -2.401100000 | -2.411278000 | 0.436024000  |
| 6 | -4.409185000 | 1.823774000  | -0.473652000 | 1 | -3.988593000 | -3.868891000 | 1.658099000  |
| 6 | -5.343247000 | 0.837389000  | -0.711199000 | 1 | -5.297811000 | -2.747843000 | 1.310587000  |
| 6 | -5.014176000 | -0.483233000 | -0.485380000 | 1 | -3.962940000 | -2.250886000 | 2.346964000  |
| 6 | -3.754790000 | -0.840775000 | -0.023743000 | 1 | -3.456562000 | -4.211371000 | -0.824898000 |
| 6 | -3.455678000 | -2.316670000 | 0.233004000  | 1 | -4.868288000 | -3.229678000 | -1.160496000 |
| 6 | -4.227621000 | -2.826002000 | 1.469981000  | 1 | -3.326966000 | -2.818892000 | -1.890981000 |
| 6 | -3.798366000 | -3.194275000 | -0.990852000 | 1 | -3.260295000 | 0.233874000  | 2.759717000  |
| 6 | -2.251543000 | -0.058426000 | 3.015670000  | 1 | -2.001661000 | -0.164805000 | 4.064249000  |
| 6 | 2.385473000  | -0.032541000 | 3.048437000  | 1 | 2.515561000  | -0.952149000 | 3.626494000  |
| 6 | 2.805259000  | 0.255431000  | 0.182470000  | 1 | 3.336570000  | 0.242155000  | 2.600700000  |
| 6 | 3.059161000  | 1.544039000  | -0.302566000 | 1 | 2.088063000  | 0.748534000  | 3.754133000  |
| 6 | 4.304871000  | 1.816715000  | -0.846973000 | 1 | 4.521209000  | 2.797582000  | -1.215926000 |
| 6 | 5.274018000  | 0.836824000  | -0.928060000 | 1 | 6.229781000  | 1.062030000  | -1.359133000 |
| 6 | 5.011264000  | -0.430253000 | -0.454568000 | 1 | 5.768268000  | -1.184957000 | -0.524241000 |
| 6 | 3.782840000  | -0.744610000 | 0.113383000  | 1 | 2.613600000  | -2.195097000 | 1.153881000  |
| 6 | 3.553947000  | -2.165448000 | 0.629019000  | 1 | 4.403176000  | -3.568326000 | 2.043923000  |
| 6 | 4.662894000  | -2.608846000 | 1.608253000  | 1 | 5.612300000  | -2.723366000 | 1.098980000  |
| 6 | 3.463863000  | -3.160242000 | -0.546886000 | 1 | 4.793528000  | -1.894266000 | 2.412031000  |
| 6 | 2.001561000  | 2.640431000  | -0.206796000 | 1 | 3.288840000  | -4.165733000 | -0.177300000 |
| 6 | 2.037726000  | 3.621423000  | -1.395783000 | 1 | 2.649190000  | -2.897758000 | -1.207960000 |
| 6 | 2.167573000  | 3.416929000  | 1.117796000  | 1 | 4.383517000  | -3.162892000 | -1.120768000 |
| 6 | 0.014296000  | -0.918954000 | -2.349159000 | 1 | 1.034814000  | 2.162187000  | -0.195463000 |
| 1 | 1.279252000  | -0.505969000 | -4.055096000 | 1 | 1.189235000  | 4.293293000  | -1.336954000 |
| 1 | -0.145389000 | -2.515793000 | -3.809385000 | 1 | 1.988566000  | 3.095993000  | -2.342676000 |
| 1 | -1.018174000 | -2.860098000 | -2.310678000 | 1 | 2.934710000  | 4.229052000  | -1.385995000 |
| 1 | 0.741546000  | -2.992881000 | -2.358209000 | 1 | 1.403200000  | 4.182547000  | 1.206539000  |
| 1 | 0.073572000  | -0.939116000 | 3.580704000  | 1 | 2.082413000  | 2.755521000  | 1.970829000  |
| 1 | -1.207697000 | 2.180762000  | 0.525502000  | 1 | 3.139891000  | 3.896731000  | 1.151393000  |
| 1 | -1.886813000 | 4.244878000  | 1.715749000  | 6 | -0.109160000 | -2.404044000 | -2.714930000 |
| 1 | -3.566880000 | 3.951929000  | 1.288409000  | 1 | 2.203609000  | -0.858930000 | -2.589310000 |
| 1 | -2.724779000 | 2.842496000  | 2.366437000  | 1 | 1.419174000  | 0.708182000  | -2.779253000 |
| 1 | -1.218875000 | 4.320603000  | -0.719708000 | 6 | 1.303411000  | -0.363943000 | -2.963187000 |

|                                                |              |              |              |   |              |              |              |              |
|------------------------------------------------|--------------|--------------|--------------|---|--------------|--------------|--------------|--------------|
| 6                                              | -1.171494000 | -0.162068000 | -2.958490000 | 6 | -1.891299000 | 3.621253000  | 1.036425000  |              |
| 1                                              | -1.148418000 | -0.265316000 | -4.054588000 | 6 | -1.963725000 | 3.242130000  | -1.456333000 |              |
| 1                                              | -1.136876000 | 0.908121000  | -2.732811000 | 6 | 0.024846000  | -0.298018000 | 2.468827000  |              |
| 1                                              | -2.137689000 | -0.538705000 | -2.612976000 | 1 | -1.377561000 | -0.104113000 | 4.112931000  |              |
| 1                                              | 0.142632000  | -1.881849000 | 1.544997000  | 1 | 0.831148000  | -1.149418000 | 4.301854000  |              |
| 1                                              | 0.196016000  | -2.234633000 | 0.665396000  | 1 | 1.866798000  | -1.401294000 | 2.890425000  |              |
| <i>Ga-intra-IM<sub>1,4'</sub></i> in gas phase |              |              |              | 1 | 0.396741000  | -2.370976000 | 3.092661000  |              |
| 31                                             | 0.041338000  | -0.901366000 | 0.558243000  | 1 | -0.077506000 | -1.330862000 | -3.449725000 |              |
| 7                                              | -1.517315000 | -0.263160000 | -0.689961000 | 1 | 1.188878000  | 2.142529000  | -0.376953000 |              |
| 6                                              | -1.312503000 | -0.470874000 | -1.944801000 | 1 | 1.771679000  | 3.975664000  | -1.983899000 |              |
| 6                                              | -0.046127000 | -1.163460000 | -2.373069000 | 1 | 3.469523000  | 3.544208000  | -1.827646000 |              |
| 6                                              | 1.265553000  | -0.487098000 | -2.011441000 | 1 | 2.333660000  | 2.407199000  | -2.547462000 |              |
| 7                                              | 1.431130000  | -0.267216000 | -0.654876000 | 1 | 1.444601000  | 4.411039000  | 0.481014000  |              |
| 6                                              | 2.770947000  | 0.080814000  | -0.215720000 | 1 | 3.180669000  | 4.247637000  | 0.586843000  |              |
| 6                                              | 3.147306000  | 1.425679000  | -0.070943000 | 1 | 2.150560000  | 3.327340000  | 1.672623000  |              |
| 6                                              | 2.179824000  | 2.564951000  | -0.379263000 | 1 | 4.737082000  | 2.747924000  | 0.443163000  |              |
| 6                                              | 2.457107000  | 3.157361000  | -1.780942000 | 1 | 6.349071000  | 0.975752000  | 0.910975000  |              |
| 6                                              | 2.246839000  | 3.703304000  | 0.663512000  | 1 | 5.700666000  | -1.364174000 | 0.647390000  |              |
| 6                                              | 4.440153000  | 1.724804000  | 0.334438000  | 1 | 2.318125000  | -2.504829000 | -0.347332000 |              |
| 6                                              | 5.354106000  | 0.726437000  | 0.597771000  | 1 | 3.865552000  | -4.005530000 | -1.567450000 |              |
| 6                                              | 4.983846000  | -0.592566000 | 0.450786000  | 1 | 5.196830000  | -2.899316000 | -1.258467000 |              |
| 6                                              | 3.703554000  | -0.937787000 | 0.040870000  | 1 | 3.859248000  | -2.398889000 | -2.288292000 |              |
| 6                                              | 3.376657000  | -2.416395000 | -0.167347000 | 1 | 3.395776000  | -4.297293000 | 0.905615000  |              |
| 6                                              | 4.124274000  | -2.963358000 | -1.405120000 | 1 | 4.789489000  | -3.291897000 | 1.250509000  |              |
| 6                                              | 3.721333000  | -3.275016000 | 1.068954000  | 1 | 3.229606000  | -2.899748000 | 1.956055000  |              |
| 6                                              | 2.139340000  | -0.227900000 | -3.007899000 | 1 | 3.121754000  | 0.179094000  | -2.812157000 |              |
| 6                                              | -2.284246000 | -0.154530000 | -3.040616000 | 1 | 1.879356000  | -0.461855000 | -4.032711000 |              |
| 6                                              | -2.829986000 | 0.192771000  | -0.220473000 | 1 | 1            | -2.561589000 | -1.086617000 | -3.544120000 |
| 6                                              | -3.019484000 | 1.542623000  | 0.081032000  | 1 | 1            | -3.180453000 | 0.349000000  | -2.689373000 |
| 6                                              | -4.271129000 | 1.947172000  | 0.517991000  | 1 | 1            | -1.769508000 | 0.462688000  | -3.784040000 |
| 6                                              | -5.297128000 | 1.036658000  | 0.673694000  | 1 | 1            | -4.444583000 | 2.978035000  | 0.745621000  |
| 6                                              | -5.082210000 | -0.296327000 | 0.399853000  | 1 | 1            | -6.257967000 | 1.365894000  | 1.016367000  |
| 6                                              | -3.848689000 | -0.747840000 | -0.050981000 | 1 | 1            | -5.879217000 | -0.998020000 | 0.538779000  |
| 6                                              | -3.662846000 | -2.240627000 | -0.325479000 | 1 | 1            | -2.657448000 | -2.408774000 | -0.676305000 |
| 6                                              | -4.650565000 | -2.740307000 | -1.403441000 | 1 | 1            | -4.451650000 | -3.782000000 | -1.631585000 |
| 6                                              | -3.830828000 | -3.061527000 | 0.971606000  | 1 | 1            | -5.673566000 | -2.663890000 | -1.055077000 |
| 6                                              | -1.887421000 | 2.551980000  | -0.076086000 | 1 | 1            | -4.562382000 | -2.166050000 | -2.317968000 |
|                                                |              |              |              | 1 | 1            | -3.675234000 | -4.114908000 | 0.764651000  |

|                                                      |              |              |              |   |              |              |              |
|------------------------------------------------------|--------------|--------------|--------------|---|--------------|--------------|--------------|
| 1                                                    | -3.107021000 | -2.750645000 | 1.711809000  | 6 | 3.682242000  | -3.291638000 | 1.061512000  |
| 1                                                    | -4.824955000 | -2.938264000 | 1.384472000  | 6 | 2.140536000  | -0.224047000 | -3.005047000 |
| 1                                                    | -0.957473000 | 2.008476000  | -0.018106000 | 6 | -2.282115000 | -0.196038000 | -3.051101000 |
| 1                                                    | -0.984226000 | 4.210128000  | 0.973375000  | 6 | -2.833179000 | 0.187484000  | -0.223812000 |
| 1                                                    | -1.936118000 | 3.167017000  | 2.017887000  | 6 | -3.033815000 | 1.540312000  | 0.061035000  |
| 1                                                    | -2.730359000 | 4.298364000  | 0.928605000  | 6 | -4.279343000 | 1.935879000  | 0.525359000  |
| 1                                                    | -1.151109000 | 3.951980000  | -1.566468000 | 6 | -5.290739000 | 1.015430000  | 0.717036000  |
| 1                                                    | -1.892401000 | 2.522768000  | -2.261161000 | 6 | -5.069085000 | -0.317819000 | 0.448127000  |
| 1                                                    | -2.903048000 | 3.774884000  | -1.554730000 | 6 | -3.841025000 | -0.761077000 | -0.026651000 |
| 6                                                    | 0.824370000  | -1.369616000 | 3.222809000  | 6 | -3.654724000 | -2.253008000 | -0.309227000 |
| 1                                                    | -1.921031000 | -1.231200000 | 2.866256000  | 6 | -4.652240000 | -2.744220000 | -1.381317000 |
| 1                                                    | -2.014283000 | 0.506548000  | 2.577941000  | 6 | -3.811756000 | -3.085317000 | 0.980753000  |
| 6                                                    | -1.401210000 | -0.280408000 | 3.025257000  | 6 | -1.926454000 | 2.567340000  | -0.152661000 |
| 6                                                    | 0.681984000  | 1.056845000  | 2.718458000  | 6 | -1.912913000 | 3.657144000  | 0.938567000  |
| 1                                                    | 0.663029000  | 1.296534000  | 3.794175000  | 6 | -2.071340000 | 3.231998000  | -1.539627000 |
| 1                                                    | 0.166205000  | 1.866958000  | 2.196015000  | 6 | 0.015533000  | -0.261261000 | 2.477221000  |
| 1                                                    | 1.726483000  | 1.062806000  | 2.396897000  | 1 | -1.370490000 | -0.126487000 | 4.141604000  |
| 1                                                    | -0.059215000 | -2.142562000 | -1.868454000 | 1 | 0.874265000  | -1.080928000 | 4.302003000  |
| 1                                                    | -0.236664000 | -2.469134000 | 0.348927000  | 1 | 1.904651000  | -1.293135000 | 2.881122000  |
|                                                      |              |              |              | 1 | 0.475159000  | -2.318395000 | 3.099532000  |
|                                                      |              |              |              | 1 | -0.064498000 | -1.343551000 | -3.442257000 |
|                                                      |              |              |              | 1 | 1.227165000  | 2.169790000  | -0.345943000 |
|                                                      |              |              |              | 1 | 1.837990000  | 4.004604000  | -1.943447000 |
|                                                      |              |              |              | 1 | 3.527138000  | 3.538442000  | -1.801275000 |
|                                                      |              |              |              | 1 | 2.364952000  | 2.432370000  | -2.525278000 |
|                                                      |              |              |              | 1 | 1.526199000  | 4.423279000  | 0.529563000  |
|                                                      |              |              |              | 1 | 3.260744000  | 4.237133000  | 0.613434000  |
|                                                      |              |              |              | 1 | 2.232009000  | 3.325949000  | 1.706538000  |
|                                                      |              |              |              | 1 | 4.787646000  | 2.711475000  | 0.460550000  |
|                                                      |              |              |              | 1 | 6.380257000  | 0.916026000  | 0.904537000  |
|                                                      |              |              |              | 1 | 5.700738000  | -1.414627000 | 0.624359000  |
|                                                      |              |              |              | 1 | 2.299827000  | -2.503326000 | -0.364340000 |
|                                                      |              |              |              | 1 | 3.818839000  | -4.029120000 | -1.579642000 |
|                                                      |              |              |              | 1 | 5.178390000  | -2.964646000 | -1.250860000 |
|                                                      |              |              |              | 1 | 3.870080000  | -2.423144000 | -2.296217000 |
|                                                      |              |              |              | 1 | 3.347334000  | -4.311610000 | 0.899226000  |
|                                                      |              |              |              | 1 | 4.748389000  | -3.320199000 | 1.255303000  |
|                                                      |              |              |              | 1 | 3.185268000  | -2.910596000 | 1.943981000  |
| <i>Ga-intra-IM<sub>1,4'</sub></i> in benzene solvent |              |              |              |   |              |              |              |
| 31                                                   | 0.031723000  | -0.866187000 | 0.564573000  |   |              |              |              |
| 7                                                    | -1.519165000 | -0.263236000 | -0.696972000 |   |              |              |              |
| 6                                                    | -1.313046000 | -0.485532000 | -1.949888000 |   |              |              |              |
| 6                                                    | -0.038051000 | -1.169884000 | -2.366811000 |   |              |              |              |
| 6                                                    | 1.268209000  | -0.483668000 | -2.005412000 |   |              |              |              |
| 7                                                    | 1.437691000  | -0.256331000 | -0.650347000 |   |              |              |              |
| 6                                                    | 2.782747000  | 0.074842000  | -0.213594000 |   |              |              |              |
| 6                                                    | 3.177712000  | 1.414154000  | -0.058063000 |   |              |              |              |
| 6                                                    | 2.226511000  | 2.572540000  | -0.351754000 |   |              |              |              |
| 6                                                    | 2.507454000  | 3.170776000  | -1.749669000 |   |              |              |              |
| 6                                                    | 2.321053000  | 3.703312000  | 0.696778000  |   |              |              |              |
| 6                                                    | 4.477008000  | 1.693068000  | 0.344849000  |   |              |              |              |
| 6                                                    | 5.380502000  | 0.681400000  | 0.594193000  |   |              |              |              |
| 6                                                    | 4.992719000  | -0.632152000 | 0.437523000  |   |              |              |              |
| 6                                                    | 3.705888000  | -0.957571000 | 0.030768000  |   |              |              |              |
| 6                                                    | 3.358428000  | -2.431856000 | -0.179182000 |   |              |              |              |
| 6                                                    | 4.105607000  | -2.995224000 | -1.408739000 |   |              |              |              |

|                                  |              |              |              |   |              |              |              |
|----------------------------------|--------------|--------------|--------------|---|--------------|--------------|--------------|
| 1                                | 3.121045000  | 0.192693000  | -2.819601000 | 6 | -1.310093000 | -0.185631000 | 2.035374000  |
| 1                                | 1.879307000  | -0.467682000 | -4.027964000 | 7 | -1.474448000 | -0.065935000 | 0.723728000  |
| 1                                | -2.530967000 | -1.135384000 | -3.556723000 | 6 | -2.840215000 | -0.001035000 | 0.200587000  |
| 1                                | -3.193744000 | 0.288732000  | -2.713825000 | 6 | -3.410319000 | 1.268913000  | 0.014725000  |
| 1                                | -1.775570000 | 0.430066000  | -3.793433000 | 6 | -2.687925000 | 2.532530000  | 0.479231000  |
| 1                                | -4.460158000 | 2.967763000  | 0.744342000  | 6 | -3.123125000 | 2.876493000  | 1.924304000  |
| 1                                | -6.246699000 | 1.337975000  | 1.080070000  | 6 | -2.943991000 | 3.758767000  | -0.422626000 |
| 1                                | -5.856504000 | -1.025917000 | 0.608363000  | 6 | -4.673696000 | 1.355147000  | -0.545596000 |
| 1                                | -2.653223000 | -2.416500000 | -0.672759000 | 6 | -5.367057000 | 0.218383000  | -0.913680000 |
| 1                                | -4.450193000 | -3.781864000 | -1.627002000 | 6 | -4.810493000 | -1.022158000 | -0.702155000 |
| 1                                | -5.672238000 | -2.679272000 | -1.020388000 | 6 | -3.548265000 | -1.160039000 | -0.133865000 |
| 1                                | -4.578691000 | -2.158984000 | -2.290567000 | 6 | -3.021061000 | -2.571198000 | 0.136458000  |
| 1                                | -3.649652000 | -4.136489000 | 0.765052000  | 6 | -3.965379000 | -3.342427000 | 1.087929000  |
| 1                                | -3.087728000 | -2.778344000 | 1.723303000  | 6 | -2.844666000 | -3.374360000 | -1.169888000 |
| 1                                | -4.805021000 | -2.974869000 | 1.400069000  | 6 | -2.279754000 | -0.603840000 | 2.972394000  |
| 1                                | -0.983564000 | 2.043040000  | -0.122056000 | 6 | 2.490714000  | -0.195534000 | 3.005528000  |
| 1                                | -1.013928000 | 4.254924000  | 0.841602000  | 6 | 2.858642000  | 0.074034000  | 0.227974000  |
| 1                                | -1.929526000 | 3.225608000  | 1.931416000  | 6 | 3.289082000  | 1.380348000  | -0.044875000 |
| 1                                | -2.761084000 | 4.324398000  | 0.839004000  | 6 | 4.574452000  | 1.566118000  | -0.526403000 |
| 1                                | -1.275794000 | 3.952994000  | -1.697155000 | 6 | 5.407758000  | 0.489109000  | -0.759723000 |
| 1                                | -2.024395000 | 2.500847000  | -2.335779000 | 6 | 4.961512000  | -0.790373000 | -0.515729000 |
| 1                                | -3.021577000 | 3.750691000  | -1.608109000 | 6 | 3.685844000  | -1.023997000 | -0.015773000 |
| 6                                | 0.864211000  | -1.300033000 | 3.222086000  | 6 | 3.237520000  | -2.464128000 | 0.229419000  |
| 1                                | -1.887842000 | -1.270393000 | 2.899835000  | 6 | 4.219180000  | -3.222078000 | 1.151065000  |
| 1                                | -2.052384000 | 0.464407000  | 2.620569000  | 6 | 3.086911000  | -3.217784000 | -1.110483000 |
| 6                                | -1.401656000 | -0.300762000 | 3.053028000  | 6 | 2.367002000  | 2.579844000  | 0.176940000  |
| 6                                | 0.622891000  | 1.116808000  | 2.721286000  | 6 | 2.520613000  | 3.658574000  | -0.917264000 |
| 1                                | 0.597999000  | 1.361746000  | 3.796386000  | 6 | 2.614164000  | 3.225817000  | 1.559222000  |
| 1                                | 0.080938000  | 1.909029000  | 2.197350000  | 6 | -0.001847000 | 0.250643000  | -2.344653000 |
| 1                                | 1.667375000  | 1.155753000  | 2.402552000  | 1 | 1.355382000  | 0.564502000  | -4.007384000 |
| 1                                | -0.048078000 | -2.147623000 | -1.860448000 | 1 | -0.922597000 | -0.277645000 | -4.243077000 |
| 1                                | -0.219858000 | -2.446166000 | 0.387477000  | 1 | -1.922898000 | -0.685069000 | -2.839881000 |
|                                  |              |              |              | 1 | -0.508501000 | -1.679896000 | -3.243380000 |
|                                  |              |              |              | 1 | 0.032004000  | 0.003933000  | 3.710538000  |
|                                  |              |              |              | 1 | -1.630960000 | 2.317186000  | 0.478194000  |
|                                  |              |              |              | 1 | -2.588742000 | 3.752137000  | 2.280126000  |
|                                  |              |              |              | 1 | -4.185968000 | 3.091657000  | 1.945739000  |
|                                  |              |              |              | 1 | -2.928576000 | 2.054484000  | 2.598823000  |
| <b>Ga-intra-TS<sub>4,4</sub></b> |              |              |              |   |              |              |              |
| 31                               | 0.019014000  | -0.576441000 | -0.517760000 |   |              |              |              |
| 7                                | 1.507739000  | -0.112057000 | 0.745455000  |   |              |              |              |
| 6                                | 1.315249000  | -0.179949000 | 2.055612000  |   |              |              |              |
| 6                                | 0.043568000  | -0.276229000 | 2.661479000  |   |              |              |              |

|   |              |              |              |    |                                    |              |              |
|---|--------------|--------------|--------------|----|------------------------------------|--------------|--------------|
| 1 | -2.290237000 | 4.569480000  | -0.118217000 | 6  | 1.403886000                        | 0.246539000  | -2.952998000 |
| 1 | -3.964427000 | 4.111064000  | -0.327295000 | 6  | -0.575287000                       | 1.664899000  | -2.388556000 |
| 1 | -2.750432000 | 3.537950000  | -1.463694000 | 1  | -0.521235000                       | 2.068698000  | -3.412815000 |
| 1 | -5.122922000 | 2.314600000  | -0.696938000 | 1  | -0.039897000                       | 2.360446000  | -1.735271000 |
| 1 | -6.341209000 | 0.302958000  | -1.353751000 | 1  | -1.626465000                       | 1.666226000  | -2.092631000 |
| 1 | -5.361945000 | -1.899561000 | -0.973276000 | 1  | -0.882873000                       | -1.357081000 | 2.864606000  |
| 1 | -2.055928000 | -2.493327000 | 0.609248000  | 1  | 0.059761000                        | -2.171456000 | -0.478105000 |
| 1 | -3.540027000 | -4.314652000 | 1.314783000  |    |                                    |              |              |
| 1 | -4.933961000 | -3.499868000 | 0.628406000  |    | <b>Ga-intra-TS<sub>4,4</sub>-w</b> |              |              |
| 1 | -4.109120000 | -2.810282000 | 2.018458000  | 31 | -0.021507000                       | -0.562585000 | 0.756650000  |
| 1 | -2.469775000 | -4.367002000 | -0.942529000 | 7  | -1.521911000                       | -0.319536000 | -0.644695000 |
| 1 | -3.789926000 | -3.480702000 | -1.689587000 | 6  | -1.308780000                       | -0.777460000 | -1.830828000 |
| 1 | -2.138218000 | -2.891023000 | -1.827338000 | 6  | 0.012818000                        | -1.360551000 | -2.213466000 |
| 1 | -3.296602000 | -0.792320000 | 2.662332000  | 6  | 1.313170000                        | -0.712033000 | -1.802463000 |
| 1 | -2.101775000 | -0.413726000 | 4.025327000  | 7  | 1.425101000                        | -0.215306000 | -0.606562000 |
| 1 | 2.902258000  | -1.207693000 | 3.036832000  | 6  | 2.716067000                        | 0.298067000  | -0.128488000 |
| 1 | 3.291362000  | 0.466011000  | 2.682629000  | 6  | 2.937279000                        | 1.681844000  | -0.158666000 |
| 1 | 2.177321000  | 0.071106000  | 4.015535000  | 6  | 1.947228000                        | 2.625021000  | -0.840021000 |
| 1 | 4.926798000  | 2.555605000  | -0.732120000 | 6  | 2.277716000                        | 2.734620000  | -2.347785000 |
| 1 | 6.397653000  | 0.649856000  | -1.138899000 | 6  | 1.925093000                        | 4.045398000  | -0.237018000 |
| 1 | 5.608896000  | -1.620347000 | -0.714066000 | 6  | 4.107024000                        | 2.172940000  | 0.395627000  |
| 1 | 2.267733000  | -2.446175000 | 0.700824000  | 6  | 5.030293000                        | 1.318267000  | 0.967840000  |
| 1 | 3.824866000  | -4.207681000 | 1.374678000  | 6  | 4.812494000                        | -0.040099000 | 0.954247000  |
| 1 | 5.183106000  | -3.350086000 | 0.673481000  | 6  | 3.664572000                        | -0.589019000 | 0.387089000  |
| 1 | 4.373610000  | -2.695611000 | 2.085318000  | 6  | 3.538290000                        | -2.114326000 | 0.307054000  |
| 1 | 2.761531000  | -4.236969000 | -0.930032000 | 6  | 4.817707000                        | -2.728136000 | -0.310853000 |
| 1 | 2.348049000  | -2.734406000 | -1.733818000 | 6  | 3.291827000                        | -2.729030000 | 1.700424000  |
| 1 | 4.030118000  | -3.247698000 | -1.643665000 | 6  | 2.393726000                        | -0.929630000 | -2.757474000 |
| 1 | 1.353149000  | 2.212023000  | 0.148631000  | 6  | -2.353592000                       | -0.874319000 | -2.903462000 |
| 1 | 1.738842000  | 4.401560000  | -0.801592000 | 6  | -2.877355000                       | 0.057411000  | -0.224227000 |
| 1 | 2.439933000  | 3.230726000  | -1.907723000 | 6  | -3.227720000                       | 1.409202000  | -0.197488000 |
| 1 | 3.472642000  | 4.169808000  | -0.836522000 | 6  | -4.505001000                       | 1.746065000  | 0.220414000  |
| 1 | 1.979381000  | 4.097150000  | 1.683000000  | 6  | -5.400082000                       | 0.772712000  | 0.619193000  |
| 1 | 2.396169000  | 2.537718000  | 2.364391000  | 6  | -5.028545000                       | -0.553455000 | 0.605298000  |
| 1 | 3.648343000  | 3.540937000  | 1.644200000  | 6  | -3.763227000                       | -0.942350000 | 0.183143000  |
| 6 | -0.892025000 | -0.653084000 | -3.207887000 | 6  | -3.406554000                       | -2.430158000 | 0.188331000  |
| 1 | 1.862522000  | -0.748173000 | -2.937865000 | 6  | -4.380508000                       | -3.242777000 | -0.694436000 |
| 1 | 2.085922000  | 0.922345000  | -2.434884000 | 6  | -3.403591000                       | -2.989715000 | 1.627608000  |



|   |              |              |              |                                                     |              |              |              |
|---|--------------|--------------|--------------|-----------------------------------------------------|--------------|--------------|--------------|
| 6 | -2.240076000 | 2.487286000  | -0.632311000 | 1                                                   | -3.140075000 | -4.041487000 | 1.612643000  |
| 6 | -2.378594000 | 3.790739000  | 0.181634000  | 1                                                   | -2.676810000 | -2.469335000 | 2.235294000  |
| 6 | -2.410429000 | 2.800608000  | -2.135828000 | 1                                                   | -4.379687000 | -2.887485000 | 2.086798000  |
| 6 | -0.090085000 | 0.517620000  | 2.442697000  | 1                                                   | -1.246542000 | 2.097700000  | -0.474074000 |
| 1 | -1.510240000 | 0.934309000  | 4.023456000  | 1                                                   | -1.550488000 | 4.450292000  | -0.051513000 |
| 1 | 0.794749000  | 0.248430000  | 4.407695000  | 1                                                   | -2.369493000 | 3.594086000  | 1.245894000  |
| 1 | 1.871082000  | -0.224342000 | 3.084225000  | 1                                                   | -3.294115000 | 4.314195000  | -0.066894000 |
| 1 | 0.521645000  | -1.277237000 | 3.551956000  | 1                                                   | -1.697834000 | 3.557646000  | -2.446013000 |
| 1 | 0.034748000  | -1.520305000 | -3.291887000 | 1                                                   | -2.253706000 | 1.919385000  | -2.743167000 |
| 1 | 0.963093000  | 2.194516000  | -0.736538000 | 1                                                   | -3.411145000 | 3.171718000  | -2.325883000 |
| 1 | 1.568204000  | 3.391402000  | -2.842318000 | 6                                                   | 0.829012000  | -0.233346000 | 3.418449000  |
| 1 | 3.272225000  | 3.147214000  | -2.474358000 | 1                                                   | -1.910587000 | -0.520584000 | 3.108331000  |
| 1 | 2.248496000  | 1.768965000  | -2.830704000 | 1                                                   | -2.216647000 | 1.069711000  | 2.406093000  |
| 1 | 1.101743000  | 4.604927000  | -0.668824000 | 6                                                   | -1.512981000 | 0.495156000  | 3.013203000  |
| 1 | 2.837418000  | 4.581808000  | -0.469254000 | 6                                                   | 0.390858000  | 1.962781000  | 2.355219000  |
| 1 | 1.798939000  | 4.024927000  | 0.836709000  | 1                                                   | 0.312259000  | 2.443568000  | 3.343453000  |
| 1 | 4.300981000  | 3.224979000  | 0.386549000  | 1                                                   | -0.202748000 | 2.559374000  | 1.657928000  |
| 1 | 5.924319000  | 1.714582000  | 1.407835000  | 1                                                   | 1.436519000  | 2.017084000  | 2.046901000  |
| 1 | 5.546986000  | -0.695411000 | 1.374617000  | 1                                                   | 0.119274000  | -2.384534000 | -1.785042000 |
| 1 | 2.746567000  | -2.431471000 | -0.364241000 | 1                                                   | -0.101022000 | -2.142170000 | 0.874331000  |
| 1 | 4.626847000  | -3.774002000 | -0.519650000 | 8                                                   | 1.917815000  | -3.402351000 | -1.902473000 |
| 1 | 5.672702000  | -2.659782000 | 0.353225000  | 1                                                   | 2.287217000  | -4.288654000 | -1.915945000 |
| 1 | 5.064571000  | -2.243278000 | -1.247741000 | 1                                                   | 2.447685000  | -2.105689000 | -2.632302000 |
| 1 | 3.263999000  | -3.810579000 | 1.618720000  |                                                     |              |              |              |
| 1 | 4.078455000  | -2.458430000 | 2.398085000  |                                                     |              |              |              |
|   |              |              |              | Ga-inter- $\text{TS}_{4,4}^{\text{I}}$ in gas phase |              |              |              |
| 1 | 2.342729000  | -2.405775000 | 2.105026000  | 31                                                  | 3.944860000  | 0.810925000  | 0.711475000  |
| 1 | 3.333702000  | -0.453779000 | -2.495210000 | 7                                                   | 3.421325000  | 0.526351000  | -1.272192000 |
| 1 | 2.088786000  | -0.717022000 | -3.783867000 | 6                                                   | 2.152846000  | 0.424373000  | -1.478167000 |
| 1 | -2.444799000 | -1.924122000 | -3.201713000 | 6                                                   | 1.228978000  | 0.519696000  | -0.297881000 |
| 1 | -3.323042000 | -0.496055000 | -2.593339000 | 6                                                   | 1.407044000  | -0.497407000 | 0.809373000  |
| 1 | -2.002804000 | -0.328608000 | -3.784338000 | 7                                                   | 2.587732000  | -0.460928000 | 1.429493000  |
| 1 | -4.802015000 | 2.773493000  | 0.243272000  | 6                                                   | 2.835058000  | -1.284981000 | 2.612893000  |
| 1 | -6.382524000 | 1.050841000  | 0.945331000  | 6                                                   | 3.140387000  | -2.646838000 | 2.501457000  |
| 1 | -5.726322000 | -1.299581000 | 0.926115000  | 6                                                   | 3.187245000  | -3.393811000 | 1.169754000  |
| 1 | -2.408914000 | -2.555754000 | -0.200678000 | 6                                                   | 2.077868000  | -4.468904000 | 1.096377000  |
| 1 | -4.057170000 | -4.276884000 | -0.739394000 | 6                                                   | 4.553156000  | -4.084357000 | 0.954753000  |
| 1 | -5.383185000 | -3.223099000 | -0.284670000 | 6                                                   | 3.397365000  | -3.365063000 | 3.663024000  |
| 1 | -4.420496000 | -2.852857000 | -1.704427000 | 6                                                   | 3.361762000  | -2.763487000 | 4.899976000  |

|   |             |              |              |    |              |              |              |
|---|-------------|--------------|--------------|----|--------------|--------------|--------------|
| 6 | 3.058384000 | -1.421558000 | 4.999863000  | 1  | 0.318206000  | 0.426380000  | 3.414408000  |
| 6 | 2.788484000 | -0.663552000 | 3.871686000  | 1  | 4.154338000  | 1.393062000  | 5.159594000  |
| 6 | 2.374119000 | 0.798855000  | 4.033771000  | 1  | 2.859154000  | 2.579105000  | 5.152688000  |
| 6 | 0.846299000 | 0.872123000  | 4.244753000  | 1  | 2.728087000  | 1.156128000  | 6.160246000  |
| 6 | 3.080668000 | 1.518547000  | 5.202051000  | 1  | 0.382949000  | -2.064134000 | 1.842331000  |
| 6 | 0.276032000 | -1.285035000 | 1.095648000  | 1  | -0.278600000 | -1.595660000 | 0.208928000  |
| 6 | 1.487714000 | 0.310983000  | -2.810880000 | 1  | 0.815724000  | 1.166958000  | -2.937564000 |
| 6 | 4.347324000 | 0.706890000  | -2.397752000 | 1  | 2.188762000  | 0.259108000  | -3.639348000 |
| 6 | 5.112483000 | -0.374538000 | -2.838354000 | 1  | 0.838748000  | -0.571096000 | -2.797003000 |
| 6 | 5.985401000 | -0.169659000 | -3.895343000 | 1  | 6.576585000  | -0.982671000 | -4.260005000 |
| 6 | 6.110373000 | 1.073525000  | -4.482494000 | 1  | 6.793505000  | 1.214534000  | -5.296267000 |
| 6 | 5.363230000 | 2.133247000  | -4.018506000 | 1  | 5.475185000  | 3.095985000  | -4.473413000 |
| 6 | 4.465987000 | 1.976195000  | -2.970064000 | 1  | 2.992203000  | 2.890334000  | -1.715289000 |
| 6 | 3.669466000 | 3.193685000  | -2.497394000 | 1  | 2.219126000  | 4.608175000  | -3.268581000 |
| 6 | 2.838732000 | 3.803461000  | -3.648925000 | 1  | 3.483597000  | 4.213093000  | -4.416757000 |
| 6 | 4.607705000 | 4.261450000  | -1.893958000 | 1  | 2.194441000  | 3.063575000  | -4.107762000 |
| 6 | 4.981068000 | -1.752032000 | -2.195841000 | 1  | 4.028179000  | 5.113774000  | -1.556081000 |
| 6 | 6.317446000 | -2.523282000 | -2.171152000 | 1  | 5.145203000  | 3.859201000  | -1.046732000 |
| 6 | 3.915155000 | -2.589367000 | -2.938442000 | 1  | 5.325448000  | 4.606502000  | -2.628412000 |
| 6 | 5.866712000 | 0.636778000  | 1.243002000  | 1  | 4.656758000  | -1.609069000 | -1.175261000 |
| 1 | 7.791605000 | 1.368123000  | 0.563954000  | 1  | 6.207193000  | -3.418143000 | -1.571762000 |
| 1 | 7.025686000 | 1.471257000  | 2.882307000  | 1  | 7.111291000  | -1.921699000 | -1.746224000 |
| 1 | 5.409005000 | 0.941239000  | 3.359301000  | 1  | 6.611444000  | -2.831577000 | -3.167139000 |
| 1 | 5.613241000 | 2.452755000  | 2.456141000  | 1  | 3.816775000  | -3.567338000 | -2.480051000 |
| 1 | 0.193980000 | 0.510277000  | -0.639904000 | 1  | 2.946679000  | -2.107495000 | -2.915838000 |
| 1 | 3.034438000 | -2.679778000 | 0.374718000  | 1  | 4.205063000  | -2.722944000 | -3.974397000 |
| 1 | 2.099199000 | -4.956541000 | 0.127362000  | 6  | 5.975142000  | 1.422550000  | 2.557191000  |
| 1 | 2.237771000 | -5.225570000 | 1.855576000  | 1  | 6.440399000  | 2.352782000  | -0.001487000 |
| 1 | 1.096220000 | -4.043605000 | 1.238197000  | 1  | 6.763590000  | 0.790171000  | -0.756423000 |
| 1 | 4.572195000 | -4.560087000 | -0.020180000 | 6  | 6.753584000  | 1.322670000  | 0.198298000  |
| 1 | 4.714855000 | -4.854803000 | 1.698505000  | 6  | 6.378571000  | -0.781175000 | 1.481944000  |
| 1 | 5.369107000 | -3.379805000 | 1.012582000  | 1  | 7.425665000  | -0.751219000 | 1.822649000  |
| 1 | 3.626057000 | -4.408765000 | 3.594129000  | 1  | 6.354710000  | -1.380519000 | 0.568388000  |
| 1 | 3.564554000 | -3.336188000 | 5.783226000  | 1  | 5.798140000  | -1.304307000 | 2.246374000  |
| 1 | 3.025309000 | -0.963385000 | 5.965910000  | 1  | 1.435617000  | 1.502266000  | 0.154093000  |
| 1 | 2.611419000 | 1.328856000  | 3.125339000  | 1  | 3.335650000  | 2.285130000  | 0.859264000  |
| 1 | 0.530024000 | 1.905373000  | 4.344414000  | 31 | -3.068240000 | 0.267486000  | -0.933670000 |
| 1 | 0.573207000 | 0.339582000  | 5.149112000  | 7  | -3.204036000 | 1.327972000  | 0.777069000  |

|   |              |              |              |   |              |              |              |
|---|--------------|--------------|--------------|---|--------------|--------------|--------------|
| 6 | -2.732140000 | 0.750851000  | 1.876385000  | 1 | -6.774343000 | -3.902359000 | 1.633847000  |
| 6 | -2.281568000 | -0.600850000 | 1.930563000  | 1 | -5.253060000 | -3.232952000 | 2.221838000  |
| 6 | -2.794967000 | -1.748625000 | 1.122503000  | 1 | -7.993620000 | -1.111402000 | 0.814382000  |
| 7 | -3.346011000 | -1.477461000 | -0.123268000 | 1 | -8.153851000 | -2.624019000 | -0.048278000 |
| 6 | -3.986151000 | -2.573474000 | -0.820435000 | 1 | -7.496715000 | -1.217721000 | -0.870015000 |
| 6 | -5.321997000 | -2.899449000 | -0.520839000 | 1 | -6.946565000 | -4.203190000 | -0.960874000 |
| 6 | -6.108531000 | -2.142604000 | 0.546493000  | 1 | -5.741504000 | -5.482252000 | -2.658670000 |
| 6 | -6.230748000 | -2.985473000 | 1.837128000  | 1 | -3.423850000 | -4.927502000 | -3.182397000 |
| 6 | -7.525275000 | -1.749195000 | 0.070880000  | 1 | -1.568223000 | -2.085353000 | -1.734466000 |
| 6 | -5.931601000 | -3.948665000 | -1.190525000 | 1 | 0.110525000  | -3.930089000 | -1.600339000 |
| 6 | -5.254461000 | -4.673952000 | -2.148889000 | 1 | -1.189777000 | -5.107266000 | -1.740109000 |
| 6 | -3.947528000 | -4.355405000 | -2.443531000 | 1 | -1.093222000 | -4.069262000 | -0.322308000 |
| 6 | -3.295087000 | -3.316511000 | -1.791383000 | 1 | -0.481166000 | -2.787514000 | -3.787866000 |
| 6 | -1.821759000 | -3.064005000 | -2.108968000 | 1 | -1.605296000 | -4.106076000 | -4.017408000 |
| 6 | -0.940247000 | -4.111327000 | -1.390359000 | 1 | -2.159887000 | -2.448269000 | -4.182438000 |
| 6 | -1.507741000 | -3.102271000 | -3.621570000 | 1 | -2.998374000 | -3.876056000 | 1.161774000  |
| 6 | -2.668269000 | -2.983687000 | 1.674432000  | 1 | -2.267123000 | -3.090837000 | 2.675272000  |
| 6 | -2.567254000 | 1.567768000  | 3.137664000  | 1 | -1.743967000 | 2.274371000  | 3.027351000  |
| 6 | -3.577160000 | 2.736188000  | 0.810848000  | 1 | -3.458829000 | 2.159080000  | 3.341793000  |
| 6 | -4.927463000 | 3.076581000  | 0.969295000  | 1 | -2.357335000 | 0.923891000  | 3.990912000  |
| 6 | -5.275364000 | 4.417679000  | 1.019913000  | 1 | -6.300852000 | 4.693459000  | 1.152340000  |
| 6 | -4.321923000 | 5.406857000  | 0.889414000  | 1 | -4.609581000 | 6.439085000  | 0.925885000  |
| 6 | -3.002110000 | 5.062426000  | 0.699393000  | 1 | -2.269071000 | 5.834651000  | 0.580844000  |
| 6 | -2.606297000 | 3.732230000  | 0.659449000  | 1 | -0.994727000 | 2.351278000  | 0.568491000  |
| 6 | -1.131511000 | 3.410835000  | 0.427339000  | 1 | 0.817794000  | 3.817252000  | 1.293533000  |
| 6 | -0.204346000 | 4.164312000  | 1.408081000  | 1 | -0.215024000 | 5.230006000  | 1.214138000  |
| 6 | -0.735601000 | 3.747027000  | -1.027554000 | 1 | -0.503343000 | 4.006828000  | 2.436912000  |
| 6 | -6.008346000 | 2.003074000  | 1.077081000  | 1 | 0.321265000  | 3.552128000  | -1.186338000 |
| 6 | -7.308703000 | 2.401762000  | 0.345554000  | 1 | -1.306311000 | 3.144120000  | -1.718848000 |
| 6 | -6.334566000 | 1.682865000  | 2.553087000  | 1 | -0.921320000 | 4.792808000  | -1.242086000 |
| 6 | -4.201699000 | 0.816455000  | -2.507030000 | 1 | -5.619336000 | 1.110687000  | 0.614869000  |
| 1 | -4.777707000 | 2.613692000  | -3.580684000 | 1 | -7.971099000 | 1.545218000  | 0.296846000  |
| 1 | -4.024860000 | 0.545538000  | -4.663084000 | 1 | -7.106456000 | 2.734950000  | -0.664241000 |
| 1 | -3.481399000 | -0.849296000 | -3.719389000 | 1 | -7.831660000 | 3.191325000  | 0.872718000  |
| 1 | -2.460900000 | 0.591515000  | -3.823581000 | 1 | -7.130891000 | 0.947985000  | 2.608008000  |
| 1 | -2.096705000 | -0.917897000 | 2.954161000  | 1 | -5.474725000 | 1.278694000  | 3.069462000  |
| 1 | -5.552041000 | -1.246701000 | 0.770026000  | 1 | -6.659821000 | 2.580425000  | 3.068000000  |
| 1 | -6.774338000 | -2.429755000 | 2.596252000  | 6 | -3.498914000 | 0.243354000  | -3.742889000 |

|   |              |              |              |   |             |              |              |
|---|--------------|--------------|--------------|---|-------------|--------------|--------------|
| 1 | -3.243579000 | 2.775359000  | -2.720549000 | 6 | 3.101843000 | 3.932249000  | -3.489948000 |
| 1 | -4.755874000 | 2.830633000  | -1.821806000 | 6 | 4.825227000 | 4.304240000  | -1.678027000 |
| 6 | -4.246315000 | 2.339730000  | -2.654094000 | 6 | 5.039975000 | -1.728840000 | -2.243434000 |
| 6 | -5.630034000 | 0.276247000  | -2.480792000 | 6 | 6.339804000 | -2.559177000 | -2.231536000 |
| 1 | -6.178238000 | 0.603583000  | -3.379967000 | 6 | 3.965841000 | -2.474350000 | -3.066668000 |
| 1 | -6.187313000 | 0.635748000  | -1.612649000 | 6 | 5.900964000 | 0.525584000  | 1.361342000  |
| 1 | -5.649909000 | -0.816307000 | -2.460776000 | 1 | 7.853032000 | 1.310463000  | 0.834937000  |
| 1 | -0.868789000 | -0.615451000 | 1.529615000  | 1 | 6.991887000 | 1.198299000  | 3.117826000  |
| 1 | -1.499655000 | 0.429220000  | -1.281431000 | 1 | 5.371102000 | 0.599249000  | 3.481549000  |

Ga-inter-TS<sub>v,A</sub>-I in gas phase

|    |             |              |              |   |             |              |              |
|----|-------------|--------------|--------------|---|-------------|--------------|--------------|
| 31 | 4.003462000 | 0.749496000  | 0.760249000  | 1 | 5.580261000 | 2.201982000  | 2.751351000  |
| 7  | 3.525001000 | 0.554431000  | -1.241568000 | 1 | 0.276883000 | 0.560207000  | -0.709950000 |
| 6  | 2.261158000 | 0.492030000  | -1.489214000 | 1 | 3.030065000 | -2.704701000 | 0.293602000  |
| 6  | 1.299562000 | 0.552826000  | -0.334399000 | 1 | 2.063818000 | -4.954804000 | -0.054797000 |
| 6  | 1.427588000 | -0.497640000 | 0.749834000  | 1 | 2.130445000 | -5.276640000 | 1.667839000  |
| 7  | 2.590846000 | -0.506661000 | 1.403425000  | 1 | 1.037354000 | -4.053101000 | 1.046295000  |
| 6  | 2.785923000 | -1.371439000 | 2.567718000  | 1 | 4.541524000 | -4.613722000 | -0.099960000 |
| 6  | 3.063022000 | -2.737202000 | 2.424191000  | 1 | 4.622402000 | -4.949830000 | 1.613866000  |
| 6  | 3.141769000 | -3.444908000 | 1.071605000  | 1 | 5.329623000 | -3.474616000 | 0.984310000  |
| 6  | 2.015734000 | -4.493719000 | 0.926665000  | 1 | 3.470281000 | -4.544141000 | 3.476822000  |
| 6  | 4.499605000 | -4.158509000 | 0.884066000  | 1 | 3.365968000 | -3.536823000 | 5.695746000  |
| 6  | 3.264891000 | -3.497350000 | 3.570917000  | 1 | 2.887848000 | -1.156118000 | 5.935329000  |
| 6  | 3.205289000 | -2.932707000 | 4.824466000  | 1 | 2.654832000 | 1.233820000  | 3.162022000  |
| 6  | 2.935405000 | -1.585833000 | 4.956654000  | 1 | 0.540664000 | 1.853778000  | 4.303123000  |
| 6  | 2.719885000 | -0.786921000 | 3.844542000  | 1 | 0.474963000 | 0.255807000  | 5.038904000  |
| 6  | 2.351659000 | 0.684388000  | 4.038487000  | 1 | 0.320474000 | 0.425654000  | 3.298278000  |
| 6  | 0.819970000 | 0.813020000  | 4.174415000  | 1 | 4.092636000 | 1.167671000  | 5.277142000  |
| 6  | 3.023705000 | 1.337284000  | 5.264149000  | 1 | 2.851813000 | 2.408399000  | 5.235462000  |
| 6  | 0.272317000 | -1.268034000 | 0.984423000  | 1 | 2.604326000 | 0.965914000  | 6.191955000  |
| 6  | 1.636625000 | 0.459379000  | -2.844066000 | 1 | 0.348427000 | -2.079628000 | 1.699489000  |
| 6  | 4.494316000 | 0.761139000  | -2.327213000 | 1 | 1.092636000 | -1.524229000 | 0.074238000  |
| 6  | 5.244442000 | -0.320769000 | -2.796300000 | 1 | 0.984803000 | 1.333567000  | -2.949520000 |
| 6  | 6.168833000 | -0.087817000 | -3.803419000 | 1 | 2.358465000 | 0.434030000  | -3.655426000 |
| 6  | 6.354879000 | 1.179707000  | -4.318853000 | 1 | 0.972457000 | -0.409932000 | -2.895599000 |
| 6  | 5.616363000 | 2.236171000  | -3.833767000 | 1 | 6.752819000 | -0.897953000 | -4.186222000 |
| 6  | 4.672438000 | 2.053564000  | -2.830738000 | 1 | 7.076980000 | 1.340737000  | -5.094755000 |
| 6  | 3.887186000 | 3.270406000  | -2.336406000 | 1 | 5.771350000 | 3.216567000  | -4.235527000 |
|    |             |              |              | 1 | 3.184329000 | 2.952551000  | -1.583419000 |
|    |             |              |              | 1 | 2.494936000 | 4.745326000  | -3.105204000 |

|    |              |              |              |   |              |              |              |
|----|--------------|--------------|--------------|---|--------------|--------------|--------------|
| 1  | 3.776941000  | 4.343523000  | -4.231059000 | 6 | -0.991314000 | -4.007682000 | -1.553589000 |
| 1  | 2.447677000  | 3.224453000  | -3.984675000 | 6 | -1.685144000 | -3.077902000 | -3.781569000 |
| 1  | 4.247079000  | 5.146958000  | -1.312911000 | 6 | -2.675108000 | -2.982649000 | 1.583847000  |
| 1  | 5.351541000  | 3.867787000  | -0.840277000 | 6 | -2.585523000 | 1.532831000  | 3.124418000  |
| 1  | 5.554405000  | 4.676747000  | -2.388050000 | 6 | -3.626892000 | 2.747213000  | 0.830692000  |
| 1  | 4.691049000  | -1.634381000 | -1.225119000 | 6 | -4.978674000 | 3.077535000  | 1.004046000  |
| 1  | 6.174689000  | -3.480917000 | -1.686844000 | 6 | -5.334030000 | 4.416349000  | 1.079197000  |
| 1  | 7.151494000  | -2.023159000 | -1.755032000 | 6 | -4.387625000 | 5.413530000  | 0.956289000  |
| 1  | 6.645695000  | -2.826732000 | -3.236003000 | 6 | -3.066913000 | 5.080010000  | 0.751552000  |
| 1  | 3.818327000  | -3.476291000 | -2.676987000 | 6 | -2.662594000 | 3.752611000  | 0.688901000  |
| 1  | 3.015178000  | -1.958717000 | -3.038578000 | 6 | -1.184512000 | 3.449797000  | 0.447044000  |
| 1  | 4.279342000  | -2.553826000 | -4.101774000 | 6 | -0.264574000 | 4.207067000  | 1.430441000  |
| 6  | 5.952998000  | 1.170121000  | 2.752806000  | 6 | -0.797156000 | 3.806618000  | -1.004340000 |
| 1  | 6.527775000  | 2.366960000  | 0.343816000  | 6 | -6.057635000 | 1.999663000  | 1.097788000  |
| 1  | 6.870709000  | 0.898362000  | -0.576414000 | 6 | -7.355517000 | 2.404157000  | 0.365536000  |
| 6  | 6.826948000  | 1.317030000  | 0.432932000  | 6 | -6.390531000 | 1.667197000  | 2.568787000  |
| 6  | 6.408889000  | -0.908373000 | 1.475499000  | 6 | -4.229490000 | 0.889519000  | -2.531533000 |
| 1  | 7.445231000  | -0.914739000 | 1.850712000  | 1 | -4.847839000 | 2.706493000  | -3.549647000 |
| 1  | 6.414187000  | -1.421528000 | 0.510138000  | 1 | -4.017843000 | 0.698443000  | -4.695151000 |
| 1  | 5.807796000  | -1.499114000 | 2.171670000  | 1 | -3.424869000 | -0.702217000 | -3.793524000 |
| 1  | 1.492696000  | 1.521047000  | 0.153229000  | 1 | -2.467487000 | 0.780523000  | -3.836261000 |
| 1  | 3.420899000  | 2.232440000  | 0.951777000  | 1 | -2.076704000 | -0.937287000 | 2.874144000  |
| 31 | -3.105490000 | 0.308769000  | -0.960237000 | 1 | -5.571851000 | -1.260479000 | 0.793108000  |
| 7  | -3.242828000 | 1.341570000  | 0.766123000  | 1 | -6.777974000 | -2.445349000 | 2.617029000  |
| 6  | -2.749182000 | 0.747075000  | 1.845653000  | 1 | -6.840501000 | -3.903737000 | 1.636866000  |
| 6  | -2.280061000 | -0.602408000 | 1.859794000  | 1 | -5.290800000 | -3.290434000 | 2.208060000  |
| 6  | -2.813758000 | -1.740155000 | 1.047810000  | 1 | -8.024585000 | -1.117539000 | 0.847647000  |
| 7  | -3.391964000 | -1.457342000 | -0.183941000 | 1 | -8.180848000 | -2.603657000 | -0.059820000 |
| 6  | -4.047358000 | -2.552793000 | -0.870134000 | 1 | -7.515761000 | -1.177085000 | -0.835405000 |
| 6  | -5.368485000 | -2.897995000 | -0.525067000 | 1 | -6.989330000 | -4.227002000 | -0.903679000 |
| 6  | -6.137706000 | -2.147957000 | 0.560290000  | 1 | -5.826557000 | -5.494954000 | -2.639849000 |
| 6  | -6.265629000 | -3.005640000 | 1.839362000  | 1 | -3.541600000 | -4.899849000 | -3.254851000 |
| 6  | -7.550370000 | -1.734793000 | 0.090798000  | 1 | -1.686289000 | -2.010116000 | -1.921758000 |
| 6  | -5.986737000 | -3.958419000 | -1.170362000 | 1 | 0.044187000  | -3.797740000 | -1.807797000 |
| 6  | -5.334227000 | -4.676733000 | -2.150734000 | 1 | -1.220261000 | -5.019251000 | -1.872819000 |
| 6  | -4.044895000 | -4.336028000 | -2.495801000 | 1 | -1.103169000 | -3.951556000 | -0.481064000 |
| 6  | -3.384095000 | -3.285216000 | -1.870385000 | 1 | -0.689469000 | -2.706958000 | -4.007577000 |
| 6  | -1.932460000 | -3.004304000 | -2.258039000 | 1 | -1.737777000 | -4.098875000 | -4.141583000 |

|                                  |              |              |              |   |              |              |              |
|----------------------------------|--------------|--------------|--------------|---|--------------|--------------|--------------|
| 1                                | -2.400481000 | -2.485173000 | -4.335277000 | 6 | -1.219057000 | -0.604567000 | -0.207270000 |
| 1                                | -3.005303000 | -3.873359000 | 1.067959000  | 6 | -1.537777000 | 0.163740000  | 1.052160000  |
| 1                                | -2.252438000 | -3.100138000 | 2.575064000  | 7 | -2.747350000 | 0.116637000  | 1.510038000  |
| 1                                | -1.822646000 | 2.303707000  | 3.011116000  | 6 | -3.078880000 | 0.659588000  | 2.842176000  |
| 1                                | -3.509473000 | 2.049391000  | 3.384155000  | 6 | -3.413967000 | 2.005811000  | 3.003780000  |
| 1                                | -2.302148000 | 0.880187000  | 3.949317000  | 6 | -3.356045000 | 3.029532000  | 1.871371000  |
| 1                                | -6.359958000 | 4.684928000  | 1.224311000  | 6 | -2.179719000 | 4.009611000  | 2.098292000  |
| 1                                | -4.681250000 | 6.443631000  | 1.010640000  | 6 | -4.662056000 | 3.846618000  | 1.752026000  |
| 1                                | -2.339507000 | 5.858517000  | 0.639647000  | 6 | -3.763089000 | 2.440246000  | 4.276283000  |
| 1                                | -1.030370000 | 2.391103000  | 0.578509000  | 6 | -3.775362000 | 1.576212000  | 5.348262000  |
| 1                                | 0.759584000  | 3.864574000  | 1.318149000  | 6 | -3.424015000 | 0.254007000  | 5.172135000  |
| 1                                | -0.277554000 | 5.273373000  | 1.238482000  | 6 | -3.067819000 | -0.232394000 | 3.923821000  |
| 1                                | -0.562187000 | 4.047192000  | 2.459774000  | 6 | -2.601390000 | -1.684345000 | 3.791578000  |
| 1                                | 0.264330000  | 3.641950000  | -1.164084000 | 6 | -1.120199000 | -1.794959000 | 4.226208000  |
| 1                                | -1.348520000 | 3.194676000  | -1.704343000 | 6 | -3.448939000 | -2.672507000 | 4.621510000  |
| 1                                | -1.009184000 | 4.848895000  | -1.213482000 | 6 | -0.379065000 | 0.841666000  | 1.666583000  |
| 1                                | -5.666327000 | 1.111629000  | 0.628091000  | 6 | -1.225077000 | -0.013255000 | -2.667985000 |
| 1                                | -8.021398000 | 1.550250000  | 0.310425000  | 6 | -4.132437000 | -0.293443000 | -2.586111000 |
| 1                                | -7.153434000 | 2.743338000  | -0.642754000 | 6 | -4.814314000 | 0.887624000  | -2.885200000 |
| 1                                | -7.879870000 | 3.191466000  | 0.895006000  | 6 | -5.601979000 | 0.913896000  | -4.024903000 |
| 1                                | -7.181570000 | 0.925361000  | 2.615324000  | 6 | -5.722351000 | -0.201970000 | -4.829659000 |
| 1                                | -5.531562000 | 1.266600000  | 3.089960000  | 6 | -5.055989000 | -1.362840000 | -4.505844000 |
| 1                                | -6.727445000 | 2.557551000  | 3.089322000  | 6 | -4.245407000 | -1.436928000 | -3.380125000 |
| 6                                | -3.491366000 | 0.388572000  | -3.777127000 | 6 | -3.532605000 | -2.755303000 | -3.072093000 |
| 1                                | -3.340359000 | 2.892349000  | -2.648736000 | 6 | -2.628975000 | -3.193463000 | -4.246617000 |
| 1                                | -4.872636000 | 2.853930000  | -1.785827000 | 6 | -4.552902000 | -3.866761000 | -2.742269000 |
| 6                                | -4.325224000 | 2.414200000  | -2.622700000 | 6 | -4.678441000 | 2.124501000  | -2.002392000 |
| 6                                | -5.641506000 | 0.307066000  | -2.542437000 | 6 | -5.971139000 | 2.965218000  | -1.950841000 |
| 1                                | -6.193899000 | 0.654768000  | -3.432054000 | 6 | -3.509236000 | 3.007281000  | -2.494674000 |
| 1                                | -6.215838000 | 0.614899000  | -1.664821000 | 6 | -6.030616000 | -0.795683000 | 0.812080000  |
| 1                                | -5.634912000 | -0.785802000 | -2.568604000 | 1 | -7.910077000 | -1.283448000 | -0.147914000 |
| 1                                | -0.883451000 | -0.606184000 | 1.441470000  | 1 | -7.362788000 | -1.829581000 | 2.182729000  |
| 1                                | -1.527732000 | 0.462809000  | -1.283651000 | 1 | -5.770126000 | -1.493355000 | 2.870355000  |
|                                  |              |              |              | 1 | -5.967979000 | -2.807721000 | 1.697497000  |
|                                  |              |              |              | 1 | -0.153271000 | -0.514692000 | -0.437085000 |
|                                  |              |              |              | 1 | -3.199569000 | 2.503130000  | 0.940865000  |
| 31                               | -4.080841000 | -0.971675000 | 0.424622000  | 1 | -2.115603000 | 4.710620000  | 1.273747000  |
| 7                                | -3.308348000 | -0.355811000 | -1.369695000 | 1 | -2.339296000 | 4.573927000  | 3.009406000  |
| 6                                | -2.023235000 | -0.290186000 | -1.439998000 |   |              |              |              |
| <i>Ga-inter-IM<sub>4,4</sub></i> |              |              |              |   |              |              |              |

|   |              |              |              |    |              |              |              |
|---|--------------|--------------|--------------|----|--------------|--------------|--------------|
| 1 | -1.232293000 | 3.497638000  | 2.179797000  | 1  | -6.738864000 | -0.546173000 | -1.251990000 |
| 1 | -4.595282000 | 4.509851000  | 0.896356000  | 6  | -6.842199000 | -1.237041000 | -0.411334000 |
| 1 | -4.813623000 | 4.462036000  | 2.629863000  | 6  | -6.500134000 | 0.587031000  | 1.256393000  |
| 1 | -5.524485000 | 3.208762000  | 1.628165000  | 1  | -7.578227000 | 0.563362000  | 1.478389000  |
| 1 | -4.018158000 | 3.468464000  | 4.427760000  | 1  | -6.346599000 | 1.339193000  | 0.478761000  |
| 1 | -4.046527000 | 1.933415000  | 6.321643000  | 1  | -5.986556000 | 0.921611000  | 2.161224000  |
| 1 | -3.418139000 | -0.403921000 | 6.015463000  | 1  | -1.435479000 | -1.660929000 | 0.024496000  |
| 1 | -2.676677000 | -1.983138000 | 2.757982000  | 1  | -3.440986000 | -2.432779000 | 0.446026000  |
| 1 | -0.772365000 | -2.815612000 | 4.109847000  | 31 | 3.074407000  | -0.116077000 | -0.821878000 |
| 1 | -1.019243000 | -1.514554000 | 5.268269000  | 7  | 3.434575000  | -1.380410000 | 0.643895000  |
| 1 | -0.479580000 | -1.149373000 | 3.641229000  | 6  | 3.077482000  | -0.958558000 | 1.903904000  |
| 1 | -4.504310000 | -2.567890000 | 4.409398000  | 6  | 2.765769000  | 0.333028000  | 2.238578000  |
| 1 | -3.150918000 | -3.686553000 | 4.379727000  | 6  | 2.862575000  | 1.594962000  | 1.490434000  |
| 1 | -3.293636000 | -2.530959000 | 5.683877000  | 7  | 3.290076000  | 1.554075000  | 0.164834000  |
| 1 | -0.589082000 | 1.290259000  | 2.633125000  | 6  | 3.782723000  | 2.782674000  | -0.413205000 |
| 1 | 0.009490000  | 1.600771000  | 0.975243000  | 6  | 5.113331000  | 3.171647000  | -0.160464000 |
| 1 | -0.575664000 | -0.875467000 | -2.858894000 | 6  | 6.025628000  | 2.336765000  | 0.734757000  |
| 1 | -1.840011000 | 0.197162000  | -3.538487000 | 6  | 6.176021000  | 2.999589000  | 2.123593000  |
| 1 | -0.539887000 | 0.814555000  | -2.460931000 | 6  | 7.428820000  | 2.125164000  | 0.123437000  |
| 1 | -6.128817000 | 1.807141000  | -4.285637000 | 6  | 5.595614000  | 4.347607000  | -0.710800000 |
| 1 | -6.338497000 | -0.164750000 | -5.705750000 | 6  | 4.797910000  | 5.144265000  | -1.507123000 |
| 1 | -5.162725000 | -2.224000000 | -5.132812000 | 6  | 3.498340000  | 4.765663000  | -1.757776000 |
| 1 | -2.911157000 | -2.626802000 | -2.200056000 | 6  | 2.972719000  | 3.595692000  | -1.221739000 |
| 1 | -2.068747000 | -4.078773000 | -3.967238000 | 6  | 1.503549000  | 3.266598000  | -1.483060000 |
| 1 | -3.220848000 | -3.434488000 | -5.121066000 | 6  | 0.595712000  | 4.129704000  | -0.576876000 |
| 1 | -1.925594000 | -2.416025000 | -4.517463000 | 6  | 1.084171000  | 3.489492000  | -2.954148000 |
| 1 | -4.031827000 | -4.791009000 | -2.518249000 | 6  | 2.590807000  | 2.743297000  | 2.178350000  |
| 1 | -5.148601000 | -3.595913000 | -1.881327000 | 6  | 3.000100000  | -1.991806000 | 3.008883000  |
| 1 | -5.216696000 | -4.043986000 | -3.579721000 | 6  | 3.849805000  | -2.749636000 | 0.448737000  |
| 1 | -4.457019000 | 1.788320000  | -0.999557000 | 6  | 5.218259000  | -3.067481000 | 0.471629000  |
| 1 | -5.871702000 | 3.734024000  | -1.194434000 | 6  | 5.611686000  | -4.385667000 | 0.298783000  |
| 1 | -6.831204000 | 2.353880000  | -1.707689000 | 6  | 4.684530000  | -5.384228000 | 0.079630000  |
| 1 | -6.154560000 | 3.460415000  | -2.896508000 | 6  | 3.344901000  | -5.067535000 | 0.026038000  |
| 1 | -3.401822000 | 3.880825000  | -1.860498000 | 6  | 2.909429000  | -3.762446000 | 0.210605000  |
| 1 | -2.571749000 | 2.467622000  | -2.486838000 | 6  | 1.413777000  | -3.466681000 | 0.126245000  |
| 1 | -3.699212000 | 3.340790000  | -3.508219000 | 6  | 0.577951000  | -4.385933000 | 1.045298000  |
| 6 | -6.287567000 | -1.790615000 | 1.953290000  | 6  | 0.922240000  | -3.605308000 | -1.331919000 |
| 1 | -6.557231000 | -2.233331000 | -0.764431000 | 6  | 6.271225000  | -1.980963000 | 0.672969000  |





|   |              |              |              |    |              |              |              |
|---|--------------|--------------|--------------|----|--------------|--------------|--------------|
| 6 | -4.404536000 | 4.037096000  | 1.727693000  | 1  | -2.716613000 | 2.653309000  | -2.601088000 |
| 6 | -1.931389000 | 1.975988000  | -2.278761000 | 1  | -1.549388000 | 1.408616000  | -3.130785000 |
| 6 | -0.736607000 | -2.313806000 | -0.900407000 | 1  | 0.259439000  | -1.920096000 | -1.097590000 |
| 6 | -2.861727000 | -2.863621000 | 0.972105000  | 1  | -0.670695000 | -3.191658000 | -0.259252000 |
| 6 | -3.546068000 | -3.806459000 | 0.198856000  | 1  | -1.179808000 | -2.617180000 | -1.854783000 |
| 6 | -3.830976000 | -5.040118000 | 0.767497000  | 1  | -4.354868000 | -5.775258000 | 0.191757000  |
| 6 | -3.453565000 | -5.337400000 | 2.058403000  | 1  | -3.690290000 | -6.293374000 | 2.481157000  |
| 6 | -2.759650000 | -4.405738000 | 2.799578000  | 1  | -2.453949000 | -4.647924000 | 3.796421000  |
| 6 | -2.443304000 | -3.160210000 | 2.276713000  | 1  | -1.375230000 | -1.328756000 | 2.552745000  |
| 6 | -1.639041000 | -2.189627000 | 3.144560000  | 1  | 0.284356000  | -2.094211000 | 4.133285000  |
| 6 | -0.332672000 | -2.842461000 | 3.649288000  | 1  | -0.541113000 | -3.625059000 | 4.368839000  |
| 6 | -2.463813000 | -1.699233000 | 4.353126000  | 1  | 0.232629000  | -3.271407000 | 2.835273000  |
| 6 | -3.979854000 | -3.562578000 | -1.245597000 | 1  | -1.869218000 | -1.017729000 | 4.951235000  |
| 6 | -5.513746000 | -3.654639000 | -1.397900000 | 1  | -3.351104000 | -1.175116000 | 4.032965000  |
| 6 | -3.316081000 | -4.583884000 | -2.200519000 | 1  | -2.762598000 | -2.532926000 | 4.977893000  |
| 6 | -5.617429000 | -0.309474000 | 1.850244000  | 1  | -3.675550000 | -2.568400000 | -1.536738000 |
| 1 | -6.875485000 | -1.898065000 | 2.605633000  | 1  | -5.789356000 | -3.527142000 | -2.438061000 |
| 1 | -6.737629000 | 0.302888000  | 3.605198000  | 1  | -6.011726000 | -2.892071000 | -0.816143000 |
| 1 | -5.625845000 | 1.546966000  | 3.031648000  | 1  | -5.874501000 | -4.622440000 | -1.073364000 |
| 1 | -5.003293000 | 0.160912000  | 3.914993000  | 1  | -3.537805000 | -4.325915000 | -3.230798000 |
| 1 | -0.485213000 | 0.123012000  | -1.462976000 | 1  | -2.242058000 | -4.612353000 | -2.075147000 |
| 1 | -4.961199000 | -0.568305000 | -1.927484000 | 1  | -3.700566000 | -5.579619000 | -2.016817000 |
| 1 | -4.458928000 | -0.976742000 | -4.344845000 | 6  | -5.741261000 | 0.470218000  | 3.169623000  |
| 1 | -4.943032000 | 0.674676000  | -4.710205000 | 1  | -5.156406000 | -2.211517000 | 2.863577000  |
| 1 | -3.517746000 | 0.373595000  | -3.735783000 | 1  | -5.847911000 | -2.411928000 | 1.264686000  |
| 1 | -6.682870000 | -1.574486000 | -3.307208000 | 6  | -5.875163000 | -1.788696000 | 2.158248000  |
| 1 | -7.222578000 | -0.025592000 | -3.900206000 | 6  | -6.722044000 | 0.179206000  | 0.908788000  |
| 1 | -7.485282000 | -0.456385000 | -2.215393000 | 1  | -7.706296000 | -0.014764000 | 1.362954000  |
| 1 | -7.197278000 | 1.993845000  | -3.298818000 | 1  | -6.698779000 | -0.341993000 | -0.051310000 |
| 1 | -7.398770000 | 4.252489000  | -2.407804000 | 1  | -6.660738000 | 1.251277000  | 0.704757000  |
| 1 | -5.818795000 | 5.052101000  | -0.731206000 | 1  | -0.695267000 | 0.730248000  | 0.179804000  |
| 1 | -2.892250000 | 3.147025000  | 0.509134000  | 1  | -2.724392000 | 0.865976000  | 2.018532000  |
| 1 | -2.705768000 | 5.095052000  | -1.113662000 | 1  | -1.085708000 | 2.548646000  | -1.886819000 |
| 1 | -2.366788000 | 5.520608000  | 0.555382000  | 31 | 3.738388000  | 0.691287000  | -1.063937000 |
| 1 | -3.909074000 | 5.943340000  | -0.157359000 | 7  | 3.670277000  | -1.182796000 | -0.390412000 |
| 1 | -4.774666000 | 3.099944000  | 2.112534000  | 6  | 2.557563000  | -1.547461000 | 0.293570000  |
| 1 | -3.699841000 | 4.442251000  | 2.445351000  | 6  | 1.608204000  | -0.673406000 | 0.790643000  |
| 1 | -5.237077000 | 4.724909000  | 1.636102000  | 6  | 1.595903000  | 0.774528000  | 0.876240000  |

|   |             |              |              |   |              |              |              |
|---|-------------|--------------|--------------|---|--------------|--------------|--------------|
| 7 | 2.669599000 | 1.474539000  | 0.407993000  | 1 | 5.514252000  | 2.598551000  | 4.311993000  |
| 6 | 2.939132000 | 2.813331000  | 0.888781000  | 1 | 6.218871000  | 2.081223000  | 2.785853000  |
| 6 | 3.680195000 | 2.961384000  | 2.078075000  | 1 | 4.605924000  | 4.349892000  | 3.398627000  |
| 6 | 4.061896000 | 1.745562000  | 2.918551000  | 1 | 4.007975000  | 6.323004000  | 2.085528000  |
| 6 | 3.032574000 | 1.544638000  | 4.055724000  | 1 | 2.687849000  | 6.074028000  | 0.047606000  |
| 6 | 5.474736000 | 1.844507000  | 3.534049000  | 1 | 1.408557000  | 2.827951000  | -1.225473000 |
| 6 | 4.042572000 | 4.229922000  | 2.495846000  | 1 | -0.351212000 | 4.596963000  | -1.580490000 |
| 6 | 3.702979000 | 5.348164000  | 1.758328000  | 1 | 0.510036000  | 5.653112000  | -0.486321000 |
| 6 | 2.963631000 | 5.202738000  | 0.607844000  | 1 | -0.190164000 | 4.162244000  | 0.121289000  |
| 6 | 2.555148000 | 3.947900000  | 0.166473000  | 1 | 1.511649000  | 4.435400000  | -3.132682000 |
| 6 | 1.626820000 | 3.869791000  | -1.044054000 | 1 | 2.523610000  | 5.504192000  | -2.176652000 |
| 6 | 0.312797000 | 4.614785000  | -0.722941000 | 1 | 3.108296000  | 3.913136000  | -2.638665000 |
| 6 | 2.239445000 | 4.468919000  | -2.326980000 | 1 | 0.397495000  | 2.425749000  | 1.583110000  |
| 6 | 0.443550000 | 1.355651000  | 1.425122000  | 1 | -0.179833000 | 0.752001000  | 2.078840000  |
| 6 | 2.292453000 | -3.024875000 | 0.494292000  | 1 | 2.066989000  | -3.508667000 | -0.458234000 |
| 6 | 4.575198000 | -2.224678000 | -0.837859000 | 1 | 3.160108000  | -3.540091000 | 0.903021000  |
| 6 | 5.683820000 | -2.563856000 | -0.047044000 | 1 | 1.448642000  | -3.173193000 | 1.164904000  |
| 6 | 6.531767000 | -3.574827000 | -0.472366000 | 1 | 7.374681000  | -3.846907000 | 0.129794000  |
| 6 | 6.316057000 | -4.229362000 | -1.668064000 | 1 | 6.985688000  | -5.004110000 | -1.986722000 |
| 6 | 5.242683000 | -3.873811000 | -2.455214000 | 1 | 5.089046000  | -4.374115000 | -3.390491000 |
| 6 | 4.358262000 | -2.880052000 | -2.057594000 | 1 | 2.555166000  | -1.824844000 | -2.454722000 |
| 6 | 3.187774000 | -2.526109000 | -2.974653000 | 1 | 1.480310000  | -3.465141000 | -3.929221000 |
| 6 | 2.350843000 | -3.769156000 | -3.355464000 | 1 | 2.925650000  | -4.453893000 | -3.967286000 |
| 6 | 3.691645000 | -1.832195000 | -4.259044000 | 1 | 2.013497000  | -4.306916000 | -2.477540000 |
| 6 | 5.976074000 | -1.828198000 | 1.258631000  | 1 | 2.855019000  | -1.585168000 | -4.905469000 |
| 6 | 7.474983000 | -1.487183000 | 1.414667000  | 1 | 4.207880000  | -0.916449000 | -4.013069000 |
| 6 | 5.516396000 | -2.645742000 | 2.486733000  | 1 | 4.368087000  | -2.480125000 | -4.804934000 |
| 6 | 5.594135000 | 1.424793000  | -1.399155000 | 1 | 5.414688000  | -0.909294000 | 1.229307000  |
| 1 | 7.420196000 | 0.812326000  | -2.398061000 | 1 | 7.608921000  | -0.822080000 | 2.261218000  |
| 1 | 6.504965000 | 3.012246000  | -2.568709000 | 1 | 7.860961000  | -0.996605000 | 0.531102000  |
| 1 | 5.006973000 | 3.492996000  | -1.763487000 | 1 | 8.063659000  | -2.378499000 | 1.599853000  |
| 1 | 4.946626000 | 2.469807000  | -3.215338000 | 1 | 5.769943000  | -2.118855000 | 3.401413000  |
| 1 | 0.761723000 | -1.143217000 | 1.279567000  | 1 | 4.446624000  | -2.803097000 | 2.479239000  |
| 1 | 4.027994000 | 0.888255000  | 2.265227000  | 1 | 6.009654000  | -3.611905000 | 2.501446000  |
| 1 | 3.278152000 | 0.657397000  | 4.632454000  | 6 | 5.496458000  | 2.667421000  | -2.286557000 |
| 1 | 3.048273000 | 2.401154000  | 4.722071000  | 1 | 5.971314000  | 0.080968000  | -3.093912000 |
| 1 | 2.035183000 | 1.434374000  | 3.655784000  | 1 | 6.604799000  | -0.520971000 | -1.565814000 |
| 1 | 5.734813000 | 0.893741000  | 3.989201000  | 6 | 6.434129000  | 0.385238000  | -2.148993000 |

|                                  |              |              |              |   |              |              |              |
|----------------------------------|--------------|--------------|--------------|---|--------------|--------------|--------------|
| 6                                | 6.325570000  | 1.821930000  | -0.117610000 | 6 | 1.824384000  | 2.498949000  | 0.551795000  |
| 1                                | 7.355639000  | 2.143858000  | -0.347137000 | 6 | 1.400106000  | 3.458729000  | -0.579395000 |
| 1                                | 6.392983000  | 0.995268000  | 0.592664000  | 6 | 2.269942000  | 3.307968000  | 1.790533000  |
| 1                                | 5.826218000  | 2.651791000  | 0.388060000  | 6 | -0.004309000 | -0.242355000 | -2.451834000 |
| 1                                | 2.731000000  | 0.700194000  | -2.327807000 | 1 | 1.399610000  | 0.084813000  | -4.058917000 |
| <i>Ga-intra-TS<sub>1,2</sub></i> |              |              |              | 1 | -0.463956000 | -1.487660000 | -4.162421000 |
| 1                                | 1.186938000  | -1.604214000 | 0.309231000  | 1 | -1.558730000 | -1.740573000 | -2.797693000 |
| 1                                | 0.478251000  | -2.200346000 | -0.143432000 | 1 | 0.080367000  | -2.420789000 | -2.758517000 |
| 31                               | -0.051847000 | -0.467365000 | -0.473696000 | 1 | 0.054057000  | -0.387367000 | 3.759369000  |
| 7                                | 1.568961000  | -0.402870000 | 0.739644000  | 1 | -1.545604000 | 2.252259000  | -0.008267000 |
| 6                                | 1.311144000  | -0.375826000 | 2.138220000  | 1 | -3.995061000 | 3.347599000  | 1.422809000  |
| 6                                | 0.073869000  | -0.325162000 | 2.675952000  | 1 | -2.676365000 | 2.458066000  | 2.178008000  |
| 6                                | -1.280068000 | -0.161163000 | 2.113119000  | 1 | -2.385346000 | 4.055503000  | 1.498724000  |
| 7                                | -1.447790000 | -0.091020000 | 0.726252000  | 1 | -2.182171000 | 4.351370000  | -1.021199000 |
| 6                                | -2.803080000 | -0.045587000 | 0.205262000  | 1 | -3.878534000 | 3.930166000  | -1.028485000 |
| 6                                | -3.362846000 | 1.183369000  | -0.178971000 | 1 | -2.765109000 | 3.090795000  | -2.099336000 |
| 6                                | -2.596841000 | 2.492533000  | 0.000802000  | 1 | -5.088050000 | 2.128195000  | -0.999106000 |
| 6                                | -2.934162000 | 3.126916000  | 1.370496000  | 1 | -6.364088000 | 0.064184000  | -1.251321000 |
| 6                                | -2.877608000 | 3.523561000  | -1.113845000 | 1 | -5.395715000 | -2.067694000 | -0.556646000 |
| 6                                | -4.647642000 | 1.199299000  | -0.701097000 | 1 | -2.002587000 | -2.441591000 | 0.918069000  |
| 6                                | -5.372806000 | 0.033250000  | -0.843269000 | 1 | -3.444193000 | -4.069888000 | 2.072231000  |
| 6                                | -4.822794000 | -1.168069000 | -0.453395000 | 1 | -4.880181000 | -3.319208000 | 1.393641000  |
| 6                                | -3.542362000 | -1.230634000 | 0.080776000  | 1 | -3.879967000 | -2.432797000 | 2.540900000  |
| 6                                | -3.007011000 | -2.582912000 | 0.554010000  | 1 | -2.556100000 | -4.554377000 | -0.225720000 |
| 6                                | -3.862479000 | -3.133114000 | 1.717514000  | 1 | -3.953801000 | -3.810442000 | -0.982959000 |
| 6                                | -2.961928000 | -3.616823000 | -0.591689000 | 1 | -2.335704000 | -3.272593000 | -1.403083000 |
| 6                                | -2.295577000 | -0.059667000 | 3.001823000  | 1 | -3.322241000 | 0.067302000  | 2.688996000  |
| 6                                | 2.511923000  | -0.490009000 | 3.042924000  | 1 | -2.089791000 | -0.108826000 | 4.063566000  |
| 6                                | 2.824290000  | 0.157734000  | 0.251456000  | 1 | 2.197583000  | -0.494824000 | 4.087453000  |
| 6                                | 2.934820000  | 1.547240000  | 0.106627000  | 1 | 3.060877000  | -1.415032000 | 2.846121000  |
| 6                                | 4.100708000  | 2.069716000  | -0.430668000 | 1 | 3.210124000  | 0.336040000  | 2.892469000  |
| 6                                | 5.133109000  | 1.243555000  | -0.825895000 | 1 | 4.202410000  | 3.130010000  | -0.544124000 |
| 6                                | 5.022040000  | -0.119691000 | -0.659143000 | 1 | 6.023184000  | 1.661983000  | -1.252508000 |
| 6                                | 3.881418000  | -0.686627000 | -0.105143000 | 1 | 5.834069000  | -0.751891000 | -0.955445000 |
| 6                                | 3.841376000  | -2.201331000 | 0.105330000  | 1 | 2.983468000  | -2.443313000 | 0.712984000  |
| 6                                | 5.093290000  | -2.701530000 | 0.861352000  | 1 | 4.980806000  | -3.754595000 | 1.096339000  |
| 6                                | 3.698957000  | -2.950688000 | -1.236841000 | 1 | 5.987024000  | -2.589549000 | 0.260161000  |
|                                  |              |              |              | 1 | 5.233687000  | -2.155406000 | 1.786361000  |

|                                  |              |              |              |   |              |              |              |
|----------------------------------|--------------|--------------|--------------|---|--------------|--------------|--------------|
| 1                                | 3.695802000  | -4.022658000 | -1.069712000 | 6 | 4.017484000  | -2.828793000 | -2.069763000 |
| 1                                | 2.773100000  | -2.682809000 | -1.727694000 | 6 | 3.179076000  | -3.554457000 | 0.209385000  |
| 1                                | 4.522884000  | -2.709275000 | -1.898353000 | 6 | 2.167595000  | 0.358999000  | -2.934859000 |
| 1                                | 0.962253000  | 1.916753000  | 0.836129000  | 6 | -2.488716000 | -0.854271000 | -2.980647000 |
| 1                                | 0.576912000  | 4.080440000  | -0.244272000 | 6 | -2.823064000 | 0.218372000  | -0.229969000 |
| 1                                | 1.075839000  | 2.906069000  | -1.450470000 | 6 | -2.768012000 | 1.616772000  | -0.260037000 |
| 1                                | 2.214428000  | 4.110515000  | -0.870915000 | 6 | -3.902434000 | 2.327605000  | 0.100370000  |
| 1                                | 1.464599000  | 3.954908000  | 2.121646000  | 6 | -5.055040000 | 1.686078000  | 0.498542000  |
| 1                                | 2.535100000  | 2.650839000  | 2.608662000  | 6 | -5.089619000 | 0.311756000  | 0.536986000  |
| 1                                | 3.129061000  | 3.924932000  | 1.553137000  | 6 | -3.988505000 | -0.452240000 | 0.171042000  |
| 6                                | -0.514708000 | -1.553480000 | -3.065559000 | 6 | -4.168109000 | -1.977864000 | 0.211085000  |
| 1                                | 2.114114000  | -0.775381000 | -2.692219000 | 6 | -5.217823000 | -2.430687000 | -0.830615000 |
| 1                                | 1.835450000  | 0.954838000  | -2.580396000 | 6 | -4.592138000 | -2.466360000 | 1.614950000  |
| 6                                | 1.416059000  | 0.020831000  | -2.960113000 | 6 | -1.528097000 | 2.391282000  | -0.702875000 |
| 6                                | -0.922176000 | 0.890706000  | -2.917353000 | 6 | -1.236364000 | 3.600415000  | 0.214615000  |
| 1                                | -0.903282000 | 0.947411000  | -4.016355000 | 6 | -1.707071000 | 2.899957000  | -2.152458000 |
| 1                                | -0.602365000 | 1.864352000  | -2.537650000 | 6 | 0.053713000  | -0.514860000 | 2.439677000  |
| 1                                | -1.958242000 | 0.731164000  | -2.609178000 | 1 | -0.422097000 | 1.076022000  | 3.839318000  |
|                                  |              |              |              | 1 | -0.971282000 | -1.370600000 | 4.157473000  |
|                                  |              |              |              | 1 | -0.636805000 | -2.549754000 | 2.875364000  |
|                                  |              |              |              | 1 | -1.941426000 | -1.367138000 | 2.680964000  |
|                                  |              |              |              | 1 | -0.085769000 | -0.320196000 | -3.673717000 |
|                                  |              |              |              | 1 | 1.393339000  | 2.142862000  | 0.358547000  |
|                                  |              |              |              | 1 | 3.762854000  | 3.689721000  | -0.764389000 |
|                                  |              |              |              | 1 | 2.521870000  | 2.876649000  | -1.712171000 |
|                                  |              |              |              | 1 | 2.108409000  | 4.284956000  | -0.740194000 |
|                                  |              |              |              | 1 | 1.846259000  | 4.042335000  | 1.799153000  |
|                                  |              |              |              | 1 | 3.569139000  | 3.740557000  | 1.778941000  |
|                                  |              |              |              | 1 | 2.495283000  | 2.619622000  | 2.603677000  |
|                                  |              |              |              | 1 | 4.973930000  | 2.176800000  | 1.235783000  |
|                                  |              |              |              | 1 | 6.414711000  | 0.207944000  | 1.124526000  |
|                                  |              |              |              | 1 | 5.560113000  | -1.876701000 | 0.179586000  |
|                                  |              |              |              | 1 | 2.140763000  | -2.316259000 | -1.188601000 |
|                                  |              |              |              | 1 | 3.637984000  | -3.747255000 | -2.506758000 |
|                                  |              |              |              | 1 | 5.049094000  | -2.995024000 | -1.781815000 |
|                                  |              |              |              | 1 | 3.987402000  | -2.052265000 | -2.822947000 |
|                                  |              |              |              | 1 | 2.806208000  | -4.479105000 | -0.219133000 |
|                                  |              |              |              | 1 | 4.185928000  | -3.728813000 | 0.570575000  |
|                                  |              |              |              |   |              |              |              |
| <i>Ga-intra-IM<sub>1,2</sub></i> |              |              |              |   |              |              |              |
| 1                                | -1.862787000 | -1.544340000 | -0.477046000 |   |              |              |              |
| 1                                | -0.014965000 | -2.505914000 | 0.136918000  |   |              |              |              |
| 31                               | 0.160038000  | -0.948338000 | 0.493752000  |   |              |              |              |
| 7                                | -1.627374000 | -0.568143000 | -0.642512000 |   |              |              |              |
| 6                                | -1.327413000 | -0.534673000 | -2.079420000 |   |              |              |              |
| 6                                | -0.110108000 | -0.291435000 | -2.587902000 |   |              |              |              |
| 6                                | 1.221363000  | 0.017719000  | -2.024795000 |   |              |              |              |
| 7                                | 1.416478000  | -0.053344000 | -0.652551000 |   |              |              |              |
| 6                                | 2.791501000  | 0.023225000  | -0.179981000 |   |              |              |              |
| 6                                | 3.282803000  | 1.219089000  | 0.362326000  |   |              |              |              |
| 6                                | 2.416380000  | 2.470182000  | 0.424612000  |   |              |              |              |
| 6                                | 2.720768000  | 3.388810000  | -0.780959000 |   |              |              |              |
| 6                                | 2.597763000  | 3.261923000  | 1.737809000  |   |              |              |              |
| 6                                | 4.590328000  | 1.266135000  | 0.823481000  |   |              |              |              |
| 6                                | 5.407223000  | 0.156650000  | 0.760553000  |   |              |              |              |
| 6                                | 4.922006000  | -1.017109000 | 0.226812000  |   |              |              |              |
| 6                                | 3.622789000  | -1.105207000 | -0.253537000 |   |              |              |              |
| 6                                | 3.156293000  | -2.431913000 | -0.850873000 |   |              |              |              |

|                                   |              |              |              |   |              |              |              |
|-----------------------------------|--------------|--------------|--------------|---|--------------|--------------|--------------|
| 1                                 | 2.551441000  | -3.296656000 | 1.052770000  | 6 | 0.146940000  | 0.257097000  | -2.316348000 |
| 1                                 | 3.180913000  | 0.596773000  | -2.642968000 | 6 | 0.977780000  | -0.629830000 | -1.441017000 |
| 1                                 | 1.922837000  | 0.386777000  | -3.989021000 | 7 | 1.618510000  | -0.049978000 | -0.418333000 |
| 1                                 | -2.185370000 | -0.793606000 | -4.026845000 | 6 | 2.646222000  | -0.791792000 | 0.317800000  |
| 1                                 | -2.849640000 | -1.872192000 | -2.796220000 | 6 | 3.967564000  | -0.554257000 | -0.097957000 |
| 1                                 | -3.327235000 | -0.172879000 | -2.818541000 | 6 | 4.271436000  | 0.387342000  | -1.259753000 |
| 1                                 | -3.881242000 | 3.396504000  | 0.072972000  | 6 | 4.538601000  | -0.430962000 | -2.543128000 |
| 1                                 | -5.919740000 | 2.254604000  | 0.777455000  | 6 | 5.457894000  | 1.329429000  | -0.968796000 |
| 1                                 | -5.987968000 | -0.180516000 | 0.846700000  | 6 | 5.005908000  | -1.214122000 | 0.535480000  |
| 1                                 | -3.240858000 | -2.482667000 | -0.022883000 | 6 | 4.760217000  | -2.084256000 | 1.577601000  |
| 1                                 | -5.295459000 | -3.512585000 | -0.830740000 | 6 | 3.466912000  | -2.295942000 | 1.994910000  |
| 1                                 | -6.190880000 | -2.022566000 | -0.587019000 | 6 | 2.388358000  | -1.663531000 | 1.384063000  |
| 1                                 | -4.955038000 | -2.103897000 | -1.827511000 | 6 | 0.996499000  | -1.958396000 | 1.949136000  |
| 1                                 | -4.636709000 | -3.549908000 | 1.625132000  | 6 | 0.660842000  | -3.467903000 | 1.907719000  |
| 1                                 | -3.889191000 | -2.145340000 | 2.369443000  | 6 | 0.891891000  | -1.464833000 | 3.410729000  |
| 1                                 | -5.572563000 | -2.089051000 | 1.876256000  | 6 | 0.568318000  | -1.967702000 | -1.455080000 |
| 1                                 | -0.676861000 | 1.731884000  | -0.664312000 | 6 | -2.088353000 | 1.424021000  | -2.438075000 |
| 1                                 | -0.285507000 | 4.037135000  | -0.064708000 | 6 | -2.673376000 | -0.319149000 | -0.084978000 |
| 1                                 | -1.188271000 | 3.307515000  | 1.253977000  | 6 | -3.323880000 | 0.425595000  | 0.912026000  |
| 1                                 | -1.991699000 | 4.368973000  | 0.105822000  | 6 | -4.556425000 | -0.005057000 | 1.388606000  |
| 1                                 | -0.803351000 | 3.400193000  | -2.483172000 | 6 | -5.179692000 | -1.117906000 | 0.878734000  |
| 1                                 | -1.913358000 | 2.087652000  | -2.834240000 | 6 | -4.581162000 | -1.800654000 | -0.155972000 |
| 1                                 | -2.528507000 | 3.606532000  | -2.197698000 | 6 | -3.347309000 | -1.418270000 | -0.657216000 |
| 6                                 | -0.926813000 | -1.509736000 | 3.065863000  | 6 | -2.803336000 | -2.227206000 | -1.834711000 |
| 1                                 | -1.429699000 | 1.088225000  | 2.385062000  | 6 | -3.805291000 | -2.253531000 | -3.012559000 |
| 1                                 | 0.245947000  | 1.653458000  | 2.308025000  | 6 | -2.456835000 | -3.667567000 | -1.399650000 |
| 6                                 | -0.414239000 | 0.904740000  | 2.750717000  | 6 | -2.799889000 | 1.735839000  | 1.486351000  |
| 6                                 | 1.439462000  | -0.740990000 | 3.057282000  | 6 | -2.520874000 | 1.626514000  | 2.999160000  |
| 1                                 | 1.389467000  | -0.607172000 | 4.150033000  | 6 | -3.790074000 | 2.888786000  | 1.201354000  |
| 1                                 | 2.183429000  | -0.042160000 | 2.668045000  | 6 | 0.619975000  | 3.057655000  | -0.174796000 |
| 1                                 | 1.814155000  | -1.754916000 | 2.874780000  | 1 | -0.050586000 | 5.115444000  | -0.023166000 |
|                                   |              |              |              | 1 | 2.288205000  | 4.332788000  | 0.420018000  |
|                                   |              |              |              | 1 | 2.659856000  | 2.604768000  | 0.536068000  |
|                                   |              |              |              | 1 | 1.628888000  | 3.368528000  | 1.752375000  |
|                                   |              |              |              | 1 | 0.505173000  | 0.629342000  | -3.267686000 |
|                                   |              |              |              | 1 | 3.395758000  | 0.992697000  | -1.415573000 |
|                                   |              |              |              | 1 | 5.411048000  | -1.061512000 | -2.411883000 |
|                                   |              |              |              | 1 | 3.694334000  | -1.069192000 | -2.777801000 |
| <i>Ga-intra-TS<sub>2',A</sub></i> |              |              |              |   |              |              |              |
| 1                                 | -0.503282000 | -1.223522000 | -0.784804000 |   |              |              |              |
| 1                                 | 0.259130000  | 0.951537000  | 1.967579000  |   |              |              |              |
| 31                                | 0.246400000  | 1.176297000  | 0.417345000  |   |              |              |              |
| 7                                 | -1.295646000 | -0.010342000 | -0.507316000 |   |              |              |              |
| 6                                 | -1.070891000 | 0.530103000  | -1.806433000 |   |              |              |              |



|    |              |              |              |   |              |              |              |
|----|--------------|--------------|--------------|---|--------------|--------------|--------------|
| 1  | 2.220029000  | 3.416422000  | -1.558448000 | 1 | 6.752112000  | -0.556834000 | -3.364185000 |
| 1  | 2.458698000  | 2.405575000  | -2.975841000 | 1 | 5.766141000  | -1.092815000 | -2.016603000 |
| 1  | 0.853664000  | 2.496444000  | -2.207381000 | 1 | 5.410916000  | -1.664430000 | -3.637597000 |
| 1  | 6.876434000  | 2.036284000  | -3.816610000 | 6 | 4.649958000  | 0.701866000  | -4.776167000 |
| 1  | 7.649317000  | 4.000469000  | -2.588052000 | 1 | 4.203839000  | -0.146148000 | -5.284374000 |
| 1  | 6.458699000  | 4.746696000  | -0.591371000 | 1 | 4.016892000  | 1.566666000  | -4.934216000 |
| 6  | 5.718488000  | -0.592383000 | 2.636934000  | 1 | 5.612606000  | 0.894616000  | -5.233507000 |
| 1  | 6.784762000  | 1.248477000  | 0.846218000  | 6 | 4.284776000  | 3.681356000  | 0.603427000  |
| 1  | 7.118661000  | 0.133996000  | -0.467496000 | 1 | 3.404572000  | 3.073477000  | 0.738135000  |
| 6  | 6.970403000  | 0.199473000  | 0.612349000  | 6 | 5.141462000  | 3.570216000  | 1.882145000  |
| 6  | 6.248170000  | -2.182508000 | 0.809845000  | 1 | 4.594229000  | 3.958843000  | 2.734330000  |
| 1  | 7.191116000  | -2.415554000 | 1.326139000  | 1 | 5.396072000  | 2.538766000  | 2.085662000  |
| 1  | 6.418115000  | -2.349672000 | -0.256637000 | 1 | 6.061354000  | 4.134363000  | 1.781594000  |
| 1  | 5.495699000  | -2.894477000 | 1.155702000  | 6 | 3.829854000  | 5.144269000  | 0.402187000  |
| 31 | 4.098612000  | -0.294130000 | 0.317810000  | 1 | 4.680425000  | 5.812457000  | 0.341191000  |
| 6  | 3.223201000  | -3.536759000 | -1.152616000 | 1 | 3.247278000  | 5.251207000  | -0.504289000 |
| 1  | 3.474106000  | -2.505840000 | -1.359643000 | 1 | 3.216068000  | 5.456390000  | 1.239700000  |
| 6  | 1.793095000  | -1.585812000 | 3.391772000  | 7 | -3.331391000 | -1.052900000 | -0.942306000 |
| 1  | 1.950993000  | -0.658869000 | 2.860341000  | 6 | -2.565553000 | -0.567494000 | -2.003645000 |
| 6  | 1.982895000  | -3.902361000 | -2.000593000 | 6 | -2.091880000 | 0.704895000  | -2.102039000 |
| 1  | 1.696777000  | -4.929921000 | -1.806375000 | 6 | -2.337484000 | 1.918061000  | -1.301731000 |
| 1  | 1.146966000  | -3.261937000 | -1.766384000 | 7 | -3.027208000 | 1.792165000  | -0.095504000 |
| 1  | 2.211909000  | -3.804676000 | -3.057100000 | 6 | -3.266526000 | 2.991321000  | 0.680323000  |
| 6  | 4.409900000  | -4.418204000 | -1.603237000 | 6 | -4.498911000 | 3.655895000  | 0.587253000  |
| 1  | 4.684082000  | -4.157835000 | -2.619784000 | 6 | -4.714177000 | 4.788768000  | 1.357782000  |
| 1  | 5.275393000  | -4.286471000 | -0.968892000 | 6 | -3.745149000 | 5.261457000  | 2.218787000  |
| 1  | 4.138921000  | -5.466686000 | -1.599923000 | 6 | -2.536821000 | 4.605786000  | 2.309545000  |
| 6  | 0.284713000  | -1.725655000 | 3.698359000  | 6 | -2.276368000 | 3.478891000  | 1.542158000  |
| 1  | 0.095815000  | -2.656188000 | 4.221743000  | 6 | -1.890208000 | 3.100269000  | -1.802343000 |
| 1  | -0.043392000 | -0.907784000 | 4.330266000  | 6 | -2.201794000 | -1.543952000 | -3.099445000 |
| 1  | -0.304261000 | -1.711080000 | 2.795077000  | 6 | -4.272488000 | -2.120922000 | -1.231342000 |
| 6  | 2.563742000  | -1.524724000 | 4.730675000  | 6 | -5.428162000 | -1.834609000 | -1.979748000 |
| 1  | 3.633928000  | -1.501425000 | 4.582864000  | 6 | -6.293772000 | -2.864200000 | -2.314633000 |
| 1  | 2.273782000  | -0.630723000 | 5.272304000  | 6 | -6.056748000 | -4.158081000 | -1.901146000 |
| 1  | 2.325788000  | -2.377106000 | 5.355220000  | 6 | -4.948761000 | -4.429418000 | -1.129387000 |
| 6  | 4.793023000  | 0.390224000  | -3.271447000 | 6 | -4.048490000 | -3.430636000 | -0.781800000 |
| 1  | 3.819697000  | 0.106900000  | -2.901433000 | 6 | -4.384782000 | -0.332522000 | 2.270265000  |
| 6  | 5.742563000  | -0.807682000 | -3.061065000 | 1 | -6.258192000 | -1.307243000 | 2.772231000  |

|    |              |              |              |                                                 |              |              |              |
|----|--------------|--------------|--------------|-------------------------------------------------|--------------|--------------|--------------|
| 1  | -4.162579000 | -1.480693000 | 4.103475000  | 1                                               | -5.937217000 | 0.765505000  | -4.235269000 |
| 1  | -2.705653000 | -0.587713000 | 3.644453000  | 1                                               | -4.702439000 | -0.476084000 | -4.322073000 |
| 1  | -3.132111000 | -2.064628000 | 2.784057000  | 6                                               | -7.181863000 | -0.009100000 | -1.932019000 |
| 1  | -1.464038000 | 0.896066000  | -2.967131000 | 1                                               | -7.947530000 | -0.624561000 | -2.388960000 |
| 1  | -5.649342000 | 5.305660000  | 1.289891000  | 1                                               | -7.261277000 | -0.108692000 | -0.857175000 |
| 1  | -3.932196000 | 6.134513000  | 2.813170000  | 1                                               | -7.380621000 | 1.023398000  | -2.197061000 |
| 1  | -1.785849000 | 4.974641000  | 2.979731000  | 6                                               | -5.590363000 | 3.167186000  | -0.358976000 |
| 1  | -2.036458000 | 4.038030000  | -1.285902000 | 1                                               | -5.386683000 | 2.130313000  | -0.568833000 |
| 1  | -1.411726000 | 3.122149000  | -2.774209000 | 6                                               | -7.006077000 | 3.274631000  | 0.248055000  |
| 1  | -1.680033000 | -2.408262000 | -2.681369000 | 1                                               | -7.309457000 | 4.308319000  | 0.364602000  |
| 1  | -3.085734000 | -1.929229000 | -3.609308000 | 1                                               | -7.721671000 | 2.796701000  | -0.411542000 |
| 1  | -1.550382000 | -1.067179000 | -3.834244000 | 1                                               | -7.058259000 | 2.790669000  | 1.215687000  |
| 1  | -7.166458000 | -2.650832000 | -2.898712000 | 6                                               | -5.532706000 | 3.952967000  | -1.688884000 |
| 1  | -6.735127000 | -4.944364000 | -2.168768000 | 1                                               | -4.563125000 | 3.841090000  | -2.153227000 |
| 1  | -4.775233000 | -5.432790000 | -0.795887000 | 1                                               | -6.292635000 | 3.590501000  | -2.375399000 |
| 6  | -3.546836000 | -1.164562000 | 3.247043000  | 1                                               | -5.714129000 | 5.006919000  | -1.504669000 |
| 1  | -5.408460000 | -2.085836000 | 1.425590000  | 6                                               | -0.915532000 | 2.802124000  | 1.658080000  |
| 1  | -6.258474000 | -0.566935000 | 1.165060000  | 1                                               | -0.864609000 | 2.027466000  | 0.913638000  |
| 6  | -5.640641000 | -1.120009000 | 1.879493000  | 6                                               | 0.233161000  | 3.794074000  | 1.388220000  |
| 6  | -4.821305000 | 0.951665000  | 2.980775000  | 1                                               | 0.276393000  | 4.566448000  | 2.147762000  |
| 1  | -5.382895000 | 0.695147000  | 3.893498000  | 1                                               | 1.179541000  | 3.264018000  | 1.391973000  |
| 1  | -5.472218000 | 1.566738000  | 2.356618000  | 1                                               | 0.105405000  | 4.262508000  | 0.420721000  |
| 1  | -3.977806000 | 1.581118000  | 3.275949000  | 6                                               | -0.746993000 | 2.144674000  | 3.043375000  |
| 31 | -3.291095000 | 0.051356000  | 0.638171000  | 1                                               | -1.509850000 | 1.392996000  | 3.192793000  |
| 6  | -2.846087000 | -3.807006000 | 0.077870000  | 1                                               | 0.222881000  | 1.661168000  | 3.115504000  |
| 1  | -2.347736000 | -2.893630000 | 0.356476000  | 1                                               | -0.824328000 | 2.880032000  | 3.836208000  |
| 6  | -1.855528000 | -4.696374000 | -0.706617000 | 1                                               | -0.889094000 | -0.752434000 | 0.742185000  |
| 1  | -0.992905000 | -4.934569000 | -0.092115000 | 1                                               | -1.615099000 | -0.333569000 | 1.165252000  |
| 1  | -2.333835000 | -5.625195000 | -0.996439000 |                                                 |              |              |              |
| 1  | -1.508740000 | -4.201597000 | -1.602711000 |                                                 |              |              |              |
| 6  | -3.272912000 | -4.550796000 | 1.364591000  |                                                 |              |              |              |
| 1  | -4.037152000 | -4.005026000 | 1.900227000  |                                                 |              |              |              |
| 1  | -3.659956000 | -5.535816000 | 1.131858000  |                                                 |              |              |              |
| 1  | -2.415965000 | -4.677073000 | 2.018843000  |                                                 |              |              |              |
| 6  | -5.773248000 | -0.413165000 | -2.421094000 |                                                 |              |              |              |
| 1  | -5.057441000 | 0.257230000  | -1.976165000 |                                                 |              |              |              |
| 6  | -5.695633000 | -0.254709000 | -3.955471000 |                                                 |              |              |              |
| 1  | -6.400461000 | -0.918136000 | -4.444647000 |                                                 |              |              |              |
|    |              |              |              | <b>Ga-inter-TS<sub>1,4</sub>-I in gas phase</b> |              |              |              |
|    |              |              |              | 7                                               | 3.632432000  | 1.152910000  | -0.758752000 |
|    |              |              |              | 6                                               | 2.317227000  | 1.314207000  | -1.144117000 |
|    |              |              |              | 6                                               | 1.314866000  | 0.445205000  | -0.808075000 |
|    |              |              |              | 6                                               | 1.343798000  | -0.816828000 | -0.099432000 |
|    |              |              |              | 7                                               | 2.503568000  | -1.252619000 | 0.504773000  |
|    |              |              |              | 6                                               | 2.543537000  | -2.592807000 | 1.088478000  |
|    |              |              |              | 6                                               | 2.862480000  | -3.690370000 | 0.269486000  |
|    |              |              |              | 6                                               | 2.881001000  | -4.957055000 | 0.835931000  |



|    |              |              |              |   |              |              |              |
|----|--------------|--------------|--------------|---|--------------|--------------|--------------|
| 6  | 2.608463000  | -5.143970000 | 2.175584000  | 1 | 3.413318000  | -2.514095000 | -1.425759000 |
| 6  | 2.320803000  | -4.059414000 | 2.974920000  | 6 | 1.919137000  | -1.613738000 | 3.384259000  |
| 6  | 2.283846000  | -2.771613000 | 2.454324000  | 1 | 2.189306000  | -0.690821000 | 2.892437000  |
| 6  | 0.133495000  | -1.520751000 | -0.044870000 | 6 | 1.942195000  | -3.926046000 | -2.078982000 |
| 6  | 1.979768000  | 2.495532000  | -2.011173000 | 1 | 1.665926000  | -4.958575000 | -1.895346000 |
| 6  | 4.678799000  | 2.025343000  | -1.272703000 | 1 | 1.097159000  | -3.296146000 | -1.846813000 |
| 6  | 5.337928000  | 1.668795000  | -2.455873000 | 1 | 2.173787000  | -3.818222000 | -3.134373000 |
| 6  | 6.432026000  | 2.420079000  | -2.859960000 | 6 | 4.370686000  | -4.417161000 | -1.667141000 |
| 6  | 6.850727000  | 3.512022000  | -2.125343000 | 1 | 4.644647000  | -4.162790000 | -2.685795000 |
| 6  | 6.159592000  | 3.886498000  | -0.991788000 | 1 | 5.234930000  | -4.270054000 | -1.033763000 |
| 6  | 5.059695000  | 3.161579000  | -0.551964000 | 1 | 4.115136000  | -5.469717000 | -1.655169000 |
| 6  | 5.881499000  | -0.783197000 | 1.105384000  | 6 | 0.397500000  | -1.601660000 | 3.652135000  |
| 1  | 7.940653000  | -0.148366000 | 1.135534000  | 1 | 0.094305000  | -2.533958000 | 4.116659000  |
| 1  | 5.379453000  | 0.275796000  | 2.979948000  | 1 | 0.144130000  | -0.790209000 | 4.326472000  |
| 1  | 6.683763000  | -0.908730000 | 3.113622000  | 1 | -0.162606000 | -1.473667000 | 2.739402000  |
| 1  | 5.010058000  | -1.456246000 | 2.983141000  | 6 | 2.654412000  | -1.681458000 | 4.742273000  |
| 1  | 0.322424000  | 0.720197000  | -1.149743000 | 1 | 3.721336000  | -1.812824000 | 4.624167000  |
| 1  | 3.110459000  | -5.806099000 | 0.225661000  | 1 | 2.483766000  | -0.760169000 | 5.290150000  |
| 1  | 2.624333000  | -6.131177000 | 2.593976000  | 1 | 2.277669000  | -2.495384000 | 5.350145000  |
| 1  | 2.116002000  | -4.213725000 | 4.014343000  | 6 | 4.870576000  | 0.483109000  | -3.300716000 |
| 1  | 0.120219000  | -2.509681000 | 0.392972000  | 1 | 3.882668000  | 0.202775000  | -2.970354000 |
| 1  | -0.527445000 | -1.370817000 | -0.895258000 | 6 | 5.796828000  | -0.733274000 | -3.098068000 |
| 1  | 2.293105000  | 3.433895000  | -1.550647000 | 1 | 6.819487000  | -0.489043000 | -3.361702000 |
| 1  | 2.491812000  | 2.423630000  | -2.974822000 | 1 | 5.782480000  | -1.054080000 | -2.063583000 |
| 1  | 0.903392000  | 2.536464000  | -2.184729000 | 1 | 5.472676000  | -1.565984000 | -3.713740000 |
| 1  | 6.959771000  | 2.154664000  | -3.753588000 | 6 | 4.780037000  | 0.839949000  | -4.799014000 |
| 1  | 7.702838000  | 4.078993000  | -2.445208000 | 1 | 4.325451000  | 0.018604000  | -5.343331000 |
| 1  | 6.475563000  | 4.751874000  | -0.444826000 | 1 | 4.174671000  | 1.725695000  | -4.953872000 |
| 6  | 5.717540000  | -0.704786000 | 2.628736000  | 1 | 5.760019000  | 1.016792000  | -5.225711000 |
| 1  | 6.819936000  | 1.200087000  | 0.928381000  | 6 | 4.288428000  | 3.639007000  | 0.677282000  |
| 1  | 7.164009000  | 0.133647000  | -0.426155000 | 1 | 3.407368000  | 3.025712000  | 0.778362000  |
| 6  | 7.000348000  | 0.159428000  | 0.653786000  | 6 | 5.123674000  | 3.490001000  | 1.965180000  |
| 6  | 6.266013000  | -2.222549000 | 0.747225000  | 1 | 4.562710000  | 3.853712000  | 2.820238000  |
| 1  | 7.202655000  | -2.483134000 | 1.262840000  | 1 | 5.374272000  | 2.452562000  | 2.144820000  |
| 1  | 6.445822000  | -2.350848000 | -0.323367000 | 1 | 6.046171000  | 4.055426000  | 1.898726000  |
| 1  | 5.507992000  | -2.944111000 | 1.059965000  | 6 | 3.831752000  | 5.105325000  | 0.514460000  |
| 31 | 4.130065000  | -0.311699000 | 0.306852000  | 1 | 4.680045000  | 5.778843000  | 0.479722000  |
| 6  | 3.172289000  | -3.548005000 | -1.224166000 | 1 | 3.254701000  | 5.238204000  | -0.392806000 |

|   |              |              |              |    |              |              |              |
|---|--------------|--------------|--------------|----|--------------|--------------|--------------|
| 1 | 3.211350000  | 5.393768000  | 1.356294000  | 1  | -5.381829000 | -2.084952000 | 1.512782000  |
| 7 | -3.384247000 | -1.050683000 | -0.924078000 | 1  | -6.258387000 | -0.577273000 | 1.264399000  |
| 6 | -2.618333000 | -0.580623000 | -1.991296000 | 6  | -5.611148000 | -1.116762000 | 1.963809000  |
| 6 | -2.135189000 | 0.688513000  | -2.103474000 | 6  | -4.792257000 | 0.969414000  | 3.027529000  |
| 6 | -2.379219000 | 1.914064000  | -1.322288000 | 1  | -5.325896000 | 0.711312000  | 3.957062000  |
| 7 | -3.061879000 | 1.807061000  | -0.110373000 | 1  | -5.471754000 | 1.571082000  | 2.419862000  |
| 6 | -3.304384000 | 3.021064000  | 0.641830000  | 1  | -3.952066000 | 1.613597000  | 3.299985000  |
| 6 | -4.534335000 | 3.687918000  | 0.528274000  | 31 | -3.311922000 | 0.069354000  | 0.646348000  |
| 6 | -4.753293000 | 4.833796000  | 1.280620000  | 6  | -2.832216000 | -3.791763000 | 0.125899000  |
| 6 | -3.789504000 | 5.318911000  | 2.140518000  | 1  | -2.346950000 | -2.867510000 | 0.391931000  |
| 6 | -2.579813000 | 4.665790000  | 2.245485000  | 6  | -1.828405000 | -4.678471000 | -0.643798000 |
| 6 | -2.315495000 | 3.526436000  | 1.497557000  | 1  | -0.962835000 | -4.894493000 | -0.025273000 |
| 6 | -1.930011000 | 3.088939000  | -1.841758000 | 1  | -2.290591000 | -5.620594000 | -0.918063000 |
| 6 | -2.262606000 | -1.565912000 | -3.080801000 | 1  | -1.486619000 | -4.195447000 | -1.548391000 |
| 6 | -4.302930000 | -2.144441000 | -1.192565000 | 6  | -3.246993000 | -4.525219000 | 1.422215000  |
| 6 | -5.471501000 | -1.892566000 | -1.935325000 | 1  | -4.020921000 | -3.987989000 | 1.953770000  |
| 6 | -6.311202000 | -2.946624000 | -2.262582000 | 1  | -3.616718000 | -5.520268000 | 1.202843000  |
| 6 | -6.037209000 | -4.232440000 | -1.845625000 | 1  | -2.387888000 | -4.629614000 | 2.077940000  |
| 6 | -4.918869000 | -4.470850000 | -1.077258000 | 6  | -5.861145000 | -0.482811000 | -2.378303000 |
| 6 | -4.043578000 | -3.446686000 | -0.736325000 | 1  | -5.158428000 | 0.207891000  | -1.943949000 |
| 6 | -4.355061000 | -0.311382000 | 2.312970000  | 6  | -5.808298000 | -0.327428000 | -3.913321000 |
| 1 | -6.201586000 | -1.306126000 | 2.874867000  | 1  | -6.504323000 | -1.007191000 | -4.393320000 |
| 1 | -4.068187000 | -1.451613000 | 4.144122000  | 1  | -6.076680000 | 0.686472000  | -4.193566000 |
| 1 | -2.641284000 | -0.531148000 | 3.651442000  | 1  | -4.815567000 | -0.526098000 | -4.295428000 |
| 1 | -3.056749000 | -2.018337000 | 2.804135000  | 6  | -7.274211000 | -0.118147000 | -1.872301000 |
| 1 | -1.503980000 | 0.864473000  | -2.969124000 | 1  | -8.027671000 | -0.759449000 | -2.314712000 |
| 1 | -5.686545000 | 5.352826000  | 1.196019000  | 1  | -7.338769000 | -0.212807000 | -0.795238000 |
| 1 | -3.979481000 | 6.201747000  | 2.719977000  | 1  | -7.510921000 | 0.905399000  | -2.141778000 |
| 1 | -1.830837000 | 5.047538000  | 2.910837000  | 6  | -5.620166000 | 3.202306000  | -0.427047000 |
| 1 | -2.066865000 | 4.036194000  | -1.339976000 | 1  | -5.381149000 | 2.186628000  | -0.694760000 |
| 1 | -1.446879000 | 3.093918000  | -2.811941000 | 6  | -7.026066000 | 3.225074000  | 0.209478000  |
| 1 | -1.791052000 | -2.455350000 | -2.657747000 | 1  | -7.353028000 | 4.237571000  | 0.415125000  |
| 1 | -3.144183000 | -1.907809000 | -3.625357000 | 1  | -7.745246000 | 2.782165000  | -0.470975000 |
| 1 | -1.569548000 | -1.112463000 | -3.792555000 | 1  | -7.048292000 | 2.665041000  | 1.136905000  |
| 1 | -7.192291000 | -2.758807000 | -2.843186000 | 6  | -5.615121000 | 4.057552000  | -1.713932000 |
| 1 | -6.694843000 | -5.038206000 | -2.108356000 | 1  | -4.650728000 | 4.005635000  | -2.201315000 |
| 1 | -4.717100000 | -5.468062000 | -0.740776000 | 1  | -6.370751000 | 3.702078000  | -2.409175000 |
| 6 | -3.479379000 | -1.124582000 | 3.272284000  | 1  | -5.831871000 | 5.094637000  | -1.478397000 |

|                                  |              |              |              |    |              |              |              |
|----------------------------------|--------------|--------------|--------------|----|--------------|--------------|--------------|
| 6                                | -0.950448000 | 2.858109000  | 1.624335000  | 1  | 5.373964000  | 3.940629000  | -3.454778000 |
| 1                                | -0.893246000 | 2.075658000  | 0.888331000  | 1  | 5.812740000  | 2.500844000  | -5.368835000 |
| 6                                | 0.195511000  | 3.852438000  | 1.350967000  | 1  | 4.944740000  | 0.221813000  | -5.421052000 |
| 1                                | 0.234084000  | 4.630249000  | 2.105642000  | 1  | 0.107308000  | -1.682282000 | 1.907647000  |
| 1                                | 1.143649000  | 3.326210000  | 1.362783000  | 1  | 1.135471000  | -1.052702000 | 3.225086000  |
| 1                                | 0.073980000  | 4.316673000  | 0.380176000  | 1  | -0.074014000 | -0.025751000 | 2.387258000  |
| 6                                | -0.780836000 | 2.216743000  | 3.016228000  | 1  | 4.642684000  | -0.133750000 | 5.719889000  |
| 1                                | -1.535706000 | 1.458923000  | 3.175525000  | 1  | 5.264767000  | -2.492142000 | 5.790135000  |
| 1                                | 0.193626000  | 1.744374000  | 3.096044000  | 1  | 4.655781000  | -3.982749000 | 3.955790000  |
| 1                                | -0.865629000 | 2.959223000  | 3.802311000  | 6  | 6.847945000  | -0.798162000 | -0.913168000 |
| 1                                | -0.903668000 | -0.717405000 | 0.705770000  | 1  | 6.465904000  | -1.595268000 | 1.736240000  |
| 1                                | -1.608576000 | -0.295662000 | 1.126701000  | 1  | 6.428347000  | 0.011983000  | 2.445392000  |
|                                  |              |              |              | 6  | 6.773394000  | -0.559532000 | 1.582223000  |
|                                  |              |              |              | 6  | 6.782110000  | 1.455576000  | 0.088744000  |
| <i>Ga-inter-IM<sub>1,4</sub></i> |              |              |              | 1  | 7.879622000  | 1.446016000  | 0.150725000  |
| 7                                | 2.993012000  | -0.518655000 | 1.454316000  | 1  | 6.424246000  | 2.135413000  | 0.865563000  |
| 6                                | 1.665041000  | -0.398601000 | 1.231751000  | 1  | 6.511544000  | 1.863328000  | -0.886612000 |
| 6                                | 1.133941000  | 0.098018000  | 0.032854000  | 31 | 4.286944000  | 0.004683000  | 0.180894000  |
| 6                                | 1.798849000  | 0.549225000  | -1.107705000 | 6  | 3.995795000  | 3.400810000  | -1.172155000 |
| 7                                | 3.150574000  | 0.614398000  | -1.202784000 | 1  | 4.019740000  | 2.814576000  | -0.262564000 |
| 6                                | 3.816337000  | 1.150059000  | -2.390990000 | 6  | 3.437245000  | -1.080134000 | -3.612772000 |
| 6                                | 4.288195000  | 2.472305000  | -2.356607000 | 1  | 2.762474000  | -1.239507000 | -2.786563000 |
| 6                                | 5.003211000  | 2.937951000  | -3.449095000 | 6  | 2.583151000  | 4.017260000  | -1.301381000 |
| 6                                | 5.249994000  | 2.124013000  | -4.538087000 | 1  | 2.504355000  | 4.563736000  | -2.233927000 |
| 6                                | 4.762722000  | 0.836774000  | -4.563805000 | 1  | 1.812454000  | 3.262506000  | -1.278336000 |
| 6                                | 4.024592000  | 0.328513000  | -3.501303000 | 1  | 2.401552000  | 4.706096000  | -0.483450000 |
| 6                                | 0.679450000  | -0.811717000 | 2.268700000  | 6  | 5.018832000  | 4.546173000  | -1.017426000 |
| 6                                | 3.508512000  | -1.083894000 | 2.701078000  | 1  | 4.838232000  | 5.056951000  | -0.078358000 |
| 6                                | 3.771661000  | -0.232594000 | 3.776758000  | 1  | 6.039002000  | 4.184960000  | -1.018243000 |
| 6                                | 4.416513000  | -0.762739000 | 4.883901000  | 1  | 4.908438000  | 5.276401000  | -1.809954000 |
| 6                                | 4.760068000  | -2.100161000 | 4.929619000  | 6  | 2.631399000  | -1.239911000 | -4.922525000 |
| 6                                | 4.424134000  | -2.939715000 | 3.887576000  | 1  | 3.284537000  | -1.218566000 | -5.786175000 |
| 6                                | 3.777650000  | -2.451300000 | 2.760180000  | 1  | 2.114811000  | -2.192546000 | -4.918803000 |
| 6                                | 6.273383000  | 0.016479000  | 0.252937000  | 1  | 1.896597000  | -0.452389000 | -5.031669000 |
| 1                                | 7.872463000  | -0.535547000 | 1.585935000  | 6  | 4.530239000  | -2.166972000 | -3.538229000 |
| 1                                | 6.584280000  | -1.857257000 | -0.863996000 | 1  | 5.015061000  | -2.160931000 | -2.572051000 |
| 1                                | 7.944936000  | -0.740007000 | -0.873451000 | 1  | 4.088737000  | -3.146117000 | -3.688059000 |
| 1                                | 6.532269000  | -0.397946000 | -1.879930000 | 1  | 5.283656000  | -2.011654000 | -4.301355000 |
| 1                                | 0.047776000  | 0.126258000  | -0.011930000 |    |              |              |              |

|   |              |              |              |    |              |              |              |
|---|--------------|--------------|--------------|----|--------------|--------------|--------------|
| 6 | 3.335647000  | 1.232791000  | 3.753070000  | 6  | -3.677459000 | 3.690549000  | 0.807632000  |
| 1 | 2.563535000  | 1.340137000  | 3.006485000  | 6  | -4.111056000 | 0.625248000  | -2.485822000 |
| 6 | 4.508718000  | 2.148933000  | 3.351745000  | 1  | -5.425831000 | 2.063789000  | -3.444412000 |
| 1 | 5.331919000  | 2.046160000  | 4.049048000  | 1  | -3.472791000 | 0.967717000  | -4.545733000 |
| 1 | 4.869053000  | 1.889428000  | 2.364566000  | 1  | -2.332818000 | -0.009756000 | -3.599498000 |
| 1 | 4.195050000  | 3.186921000  | 3.335005000  | 1  | -2.421564000 | 1.731404000  | -3.339439000 |
| 6 | 2.739332000  | 1.687398000  | 5.101526000  | 1  | -2.242047000 | -0.727758000 | 3.163889000  |
| 1 | 2.322797000  | 2.682773000  | 4.995039000  | 1  | -5.988813000 | -5.040828000 | -0.803786000 |
| 1 | 1.948888000  | 1.019281000  | 5.420589000  | 1  | -4.461603000 | -6.070347000 | -2.413840000 |
| 1 | 3.494102000  | 1.726232000  | 5.877364000  | 1  | -2.336246000 | -4.986293000 | -2.935393000 |
| 6 | 3.355492000  | -3.400428000 | 1.638663000  | 1  | -2.179473000 | -3.770422000 | 1.242737000  |
| 1 | 2.650910000  | -2.884664000 | 1.004739000  | 1  | -1.868224000 | -2.890692000 | 2.845579000  |
| 6 | 4.568042000  | -3.801260000 | 0.773409000  | 1  | -2.681366000 | 2.522867000  | 3.151069000  |
| 1 | 4.262244000  | -4.469456000 | -0.023835000 | 1  | -4.272179000 | 1.909318000  | 3.537446000  |
| 1 | 5.022682000  | -2.925444000 | 0.325347000  | 1  | -2.838313000 | 1.064845000  | 4.146978000  |
| 1 | 5.320635000  | -4.299580000 | 1.373279000  | 1  | -7.507953000 | 3.867149000  | 1.119100000  |
| 6 | 2.642415000  | -4.655649000 | 2.184562000  | 1  | -6.203275000 | 5.926579000  | 0.993707000  |
| 1 | 3.319809000  | -5.282488000 | 2.751610000  | 1  | -3.774853000 | 5.820929000  | 0.752869000  |
| 1 | 1.809609000  | -4.380193000 | 2.819450000  | 6  | -3.023997000 | 0.838340000  | -3.546863000 |
| 1 | 2.258035000  | -5.241351000 | 1.357260000  | 1  | -4.445692000 | 2.775600000  | -2.152360000 |
| 7 | -3.771726000 | 1.220317000  | 0.896725000  | 1  | -5.823192000 | 1.766654000  | -1.746748000 |
| 6 | -3.219339000 | 0.732389000  | 2.055630000  | 6  | -4.992711000 | 1.875323000  | -2.446945000 |
| 6 | -2.641927000 | -0.505290000 | 2.179767000  | 6  | -4.981883000 | -0.560094000 | -2.905685000 |
| 6 | -2.628462000 | -1.667678000 | 1.283014000  | 1  | -5.505072000 | -0.336431000 | -3.850963000 |
| 7 | -3.157164000 | -1.528602000 | 0.003412000  | 1  | -5.743116000 | -0.783670000 | -2.152438000 |
| 6 | -3.502864000 | -2.750316000 | -0.680936000 | 1  | -4.401588000 | -1.474362000 | -3.054670000 |
| 6 | -4.731098000 | -3.373261000 | -0.395649000 | 31 | -3.166679000 | 0.292372000  | -0.731692000 |
| 6 | -5.055510000 | -4.562936000 | -1.026356000 | 6  | -2.162235000 | 3.665418000  | 0.613706000  |
| 6 | -4.197230000 | -5.147001000 | -1.935871000 | 1  | -1.817579000 | 2.659747000  | 0.792121000  |
| 6 | -2.999972000 | -4.531561000 | -2.227108000 | 6  | -1.421036000 | 4.624514000  | 1.570512000  |
| 6 | -2.637945000 | -3.337792000 | -1.614898000 | 1  | -0.347936000 | 4.497807000  | 1.458604000  |
| 6 | -2.157629000 | -2.846062000 | 1.801305000  | 1  | -1.655660000 | 5.659244000  | 1.350406000  |
| 6 | -3.252931000 | 1.604874000  | 3.293606000  | 1  | -1.681971000 | 4.431063000  | 2.603849000  |
| 6 | -4.421472000 | 2.507568000  | 0.911993000  | 6  | -1.817739000 | 4.018232000  | -0.849600000 |
| 6 | -5.821563000 | 2.569949000  | 1.000684000  | 1  | -2.265609000 | 3.296444000  | -1.516497000 |
| 6 | -6.441841000 | 3.808710000  | 1.040253000  | 1  | -2.186963000 | 5.005352000  | -1.104149000 |
| 6 | -5.707379000 | 4.975792000  | 0.965439000  | 1  | -0.742097000 | 4.002917000  | -1.001108000 |
| 6 | -4.337233000 | 4.912131000  | 0.835956000  | 6  | -6.650550000 | 1.287420000  | 1.034465000  |

|                                     |              |              |              |   |              |              |              |
|-------------------------------------|--------------|--------------|--------------|---|--------------|--------------|--------------|
| 1                                   | -6.076416000 | 0.533474000  | 0.519716000  | 6 | -2.125704000 | 0.627323000  | -2.187666000 |
| 6                                   | -6.881375000 | 0.811367000  | 2.486010000  | 6 | -2.837421000 | -0.576774000 | -2.086935000 |
| 1                                   | -7.373357000 | 1.589167000  | 3.061061000  | 7 | -3.638939000 | -0.884858000 | -1.054224000 |
| 1                                   | -7.511081000 | -0.072780000 | 2.495893000  | 6 | -4.565080000 | -2.027100000 | -1.112000000 |
| 1                                   | -5.945620000 | 0.558636000  | 2.963540000  | 6 | -4.179268000 | -3.285058000 | -0.641168000 |
| 6                                   | -8.014135000 | 1.433506000  | 0.325475000  | 6 | -5.126113000 | -4.303879000 | -0.644568000 |
| 1                                   | -8.689411000 | 2.066888000  | 0.889937000  | 6 | -6.401124000 | -4.092519000 | -1.116072000 |
| 1                                   | -7.899809000 | 1.849760000  | -0.667843000 | 6 | -6.760189000 | -2.851328000 | -1.605368000 |
| 1                                   | -8.478094000 | 0.457558000  | 0.235088000  | 6 | -5.858998000 | -1.799370000 | -1.611314000 |
| 6                                   | -5.705488000 | -2.772895000 | 0.612271000  | 6 | -1.291576000 | 2.921001000  | -1.744070000 |
| 1                                   | -5.331396000 | -1.795548000 | 0.869431000  | 6 | -2.863557000 | 3.016051000  | 0.605751000  |
| 6                                   | -7.124148000 | -2.620866000 | 0.020921000  | 6 | -1.880163000 | 3.315660000  | 1.549719000  |
| 1                                   | -7.562720000 | -3.586653000 | -0.202991000 | 6 | -2.017273000 | 4.487347000  | 2.284605000  |
| 1                                   | -7.769795000 | -2.122389000 | 0.737140000  | 6 | -3.083216000 | 5.335459000  | 2.082959000  |
| 1                                   | -7.105685000 | -2.035521000 | -0.889324000 | 6 | -4.045203000 | 5.026114000  | 1.141459000  |
| 6                                   | -5.763672000 | -3.630755000 | 1.895750000  | 6 | -3.960624000 | 3.863011000  | 0.392827000  |
| 1                                   | -4.777977000 | -3.718159000 | 2.330308000  | 6 | -4.944643000 | 0.122417000  | 2.045503000  |
| 1                                   | -6.426134000 | -3.171225000 | 2.623829000  | 1 | -5.530247000 | 1.233633000  | 3.795107000  |
| 1                                   | -6.141032000 | -4.623620000 | 1.672201000  | 1 | -6.650221000 | 0.859275000  | 0.878634000  |
| 6                                   | -1.292602000 | -2.709078000 | -1.964273000 | 1 | -7.080245000 | -0.006913000 | 2.357776000  |
| 1                                   | -1.296818000 | -1.699684000 | -1.587031000 | 1 | -6.528269000 | -0.908662000 | 0.939185000  |
| 6                                   | -0.135795000 | -3.472721000 | -1.280450000 | 1 | -1.491779000 | 0.713036000  | -3.061580000 |
| 1                                   | -0.106112000 | -4.500377000 | -1.627497000 | 1 | -4.850303000 | -5.273735000 | -0.284861000 |
| 1                                   | 0.818243000  | -3.004052000 | -1.515085000 | 1 | -7.114368000 | -4.892666000 | -1.113266000 |
| 1                                   | -0.271484000 | -3.469467000 | -0.208112000 | 1 | -7.750422000 | -2.704619000 | -1.982346000 |
| 6                                   | -1.054402000 | -2.666118000 | -3.489951000 | 1 | -1.064845000 | 2.876559000  | -2.809399000 |
| 1                                   | -1.898692000 | -2.226956000 | -4.004568000 | 1 | -1.775708000 | 3.865539000  | -1.505748000 |
| 1                                   | -0.172007000 | -2.073669000 | -3.711321000 | 1 | -0.345964000 | 2.889736000  | -1.192021000 |
| 1                                   | -0.890296000 | -3.659920000 | -3.890215000 | 1 | -1.275263000 | 4.735889000  | 3.014979000  |
| 1                                   | -1.603121000 | 0.715561000  | -0.817012000 | 1 | -3.166601000 | 6.237640000  | 2.655787000  |
| 6                                   | 0.941460000  | 0.945889000  | -2.275274000 | 1 | -4.867187000 | 5.695314000  | 0.991770000  |
| 1                                   | 0.713272000  | 0.048599000  | -2.858846000 | 6 | -6.378253000 | 0.009433000  | 1.511676000  |
| 1                                   | -0.020084000 | 1.323948000  | -1.921527000 | 1 | -5.108867000 | 2.280105000  | 2.431967000  |
| 1                                   | 1.429886000  | 1.660681000  | -2.933089000 | 1 | -3.839263000 | 1.495410000  | 3.359232000  |
|                                     |              |              |              | 6 | -4.840710000 | 1.356650000  | 2.947460000  |
|                                     |              |              |              | 6 | -4.627523000 | -1.129721000 | 2.867823000  |
|                                     |              |              |              | 1 | -5.347448000 | -1.215770000 | 3.693636000  |
|                                     |              |              |              | 1 | -3.625556000 | -1.097314000 | 3.309776000  |
| <i>Ga-inter-TS<sub>1,4</sub>-II</i> |              |              |              |   |              |              |              |
| 7                                   | -2.781281000 | 1.769398000  | -0.165343000 |   |              |              |              |
| 6                                   | -2.120477000 | 1.737673000  | -1.331441000 |   |              |              |              |

|    |              |              |              |   |              |              |              |
|----|--------------|--------------|--------------|---|--------------|--------------|--------------|
| 1  | -4.707954000 | -2.038411000 | 2.265819000  | 6 | -4.828351000 | 4.399034000  | -1.923760000 |
| 31 | -3.698030000 | 0.237417000  | 0.500922000  | 1 | -4.856121000 | 5.455240000  | -1.682855000 |
| 6  | -2.753982000 | -3.608979000 | -0.200579000 | 1 | -3.876296000 | 4.179986000  | -2.388166000 |
| 1  | -2.167528000 | -2.708833000 | -0.247605000 | 1 | -5.612188000 | 4.191488000  | -2.644660000 |
| 6  | -6.275290000 | -0.448248000 | -2.197440000 | 6 | -2.610280000 | -1.568436000 | -3.193942000 |
| 1  | -5.670221000 | 0.319483000  | -1.738049000 | 1 | -2.491281000 | -1.055378000 | -4.148970000 |
| 6  | -2.117287000 | -4.647436000 | -1.155161000 | 1 | -1.667909000 | -2.084886000 | -2.976147000 |
| 1  | -2.617924000 | -5.604503000 | -1.064894000 | 1 | -3.400726000 | -2.310451000 | -3.263960000 |
| 1  | -2.177229000 | -4.330962000 | -2.188214000 | 1 | -2.253006000 | -0.739009000 | 1.603123000  |
| 1  | -1.073356000 | -4.781580000 | -0.898940000 | 1 | -1.559858000 | -0.673193000 | 1.268968000  |
| 6  | -2.684891000 | -4.151471000 | 1.243468000  | 7 | 3.850420000  | 0.997973000  | -0.739480000 |
| 1  | -1.651649000 | -4.348518000 | 1.505818000  | 6 | 2.600016000  | 1.191273000  | -1.250798000 |
| 1  | -3.082626000 | -3.441844000 | 1.954623000  | 6 | 1.486059000  | 0.472993000  | -0.889586000 |
| 1  | -3.238505000 | -5.078215000 | 1.337884000  | 6 | 1.340662000  | -0.730681000 | -0.075090000 |
| 6  | -6.005751000 | -0.419676000 | -3.720631000 | 7 | 2.454421000  | -1.276226000 | 0.509502000  |
| 1  | -6.567889000 | -1.207814000 | -4.207891000 | 6 | 2.360208000  | -2.617261000 | 1.039634000  |
| 1  | -6.315467000 | 0.532648000  | -4.137843000 | 6 | 2.690823000  | -3.702326000 | 0.204267000  |
| 1  | -4.958129000 | -0.560268000 | -3.942198000 | 6 | 2.660624000  | -4.988124000 | 0.717837000  |
| 6  | -7.760112000 | -0.102862000 | -1.951367000 | 6 | 2.317939000  | -5.221222000 | 2.036239000  |
| 1  | -8.034760000 | -0.222049000 | -0.912279000 | 6 | 1.973877000  | -4.162417000 | 2.845740000  |
| 1  | -7.939257000 | 0.927626000  | -2.238529000 | 6 | 1.969849000  | -2.857385000 | 2.363617000  |
| 1  | -8.411046000 | -0.724409000 | -2.553917000 | 6 | 0.072501000  | -1.277069000 | 0.008743000  |
| 6  | -0.671171000 | 2.418698000  | 1.803779000  | 6 | 2.395597000  | 2.294373000  | -2.270839000 |
| 1  | -0.651603000 | 1.626420000  | 1.072538000  | 6 | 4.955003000  | 1.759281000  | -1.279734000 |
| 6  | -0.759986000 | 1.770787000  | 3.202306000  | 6 | 5.737966000  | 1.201847000  | -2.303692000 |
| 1  | -0.779024000 | 2.527838000  | 3.977514000  | 6 | 6.791701000  | 1.934987000  | -2.826179000 |
| 1  | -1.651978000 | 1.164302000  | 3.293364000  | 6 | 7.096222000  | 3.189811000  | -2.337169000 |
| 1  | 0.100969000  | 1.134844000  | 3.361829000  | 6 | 6.343042000  | 3.723323000  | -1.314501000 |
| 6  | 0.658520000  | 3.194610000  | 1.682248000  | 6 | 5.266919000  | 3.029285000  | -0.776807000 |
| 1  | 1.480623000  | 2.492559000  | 1.717754000  | 6 | 5.758590000  | -0.949901000 | 1.314831000  |
| 1  | 0.715300000  | 3.737304000  | 0.746297000  | 1 | 7.866931000  | -0.438575000 | 1.312820000  |
| 1  | 0.773480000  | 3.902786000  | 2.494710000  | 1 | 6.803888000  | -1.699301000 | 3.067556000  |
| 6  | -5.043127000 | 3.558334000  | -0.643920000 | 1 | 5.071726000  | -2.056908000 | 3.067397000  |
| 1  | -4.967678000 | 2.516187000  | -0.915996000 | 1 | 5.638958000  | -0.414309000 | 3.437100000  |
| 6  | -6.467805000 | 3.809816000  | -0.102130000 | 1 | 0.563096000  | 0.768128000  | -1.376202000 |
| 1  | -7.197906000 | 3.438723000  | -0.813433000 | 1 | 2.916475000  | -5.816804000 | 0.089154000  |
| 1  | -6.626228000 | 3.310698000  | 0.844824000  | 1 | 2.316669000  | -6.221394000 | 2.424414000  |
| 1  | -6.653342000 | 4.867611000  | 0.035159000  | 1 | 1.697737000  | -4.348073000 | 3.864890000  |



|    |             |              |              |   |              |              |              |
|----|-------------|--------------|--------------|---|--------------|--------------|--------------|
| 6  | 5.428877000 | -2.583840000 | -0.831460000 | 1 | 2.141322000  | -2.313223000 | -4.083666000 |
| 6  | 6.144466000 | -3.530073000 | -1.547903000 | 1 | 1.840712000  | -4.034837000 | -4.215913000 |
| 6  | 5.516771000 | -4.383502000 | -2.430435000 | 1 | 0.525247000  | -2.953974000 | -3.806499000 |
| 6  | 4.155943000 | -4.283568000 | -2.611477000 | 6 | 6.188818000  | -1.636430000 | 0.093481000  |
| 6  | 3.398862000 | -3.360724000 | -1.901040000 | 1 | 5.502265000  | -0.875213000 | 0.423198000  |
| 6  | 2.944914000 | 0.992495000  | -2.429359000 | 6 | 6.730340000  | -2.373383000 | 1.338157000  |
| 1  | 4.290988000 | 0.771377000  | -4.121973000 | 1 | 7.416388000  | -3.161040000 | 1.045358000  |
| 1  | 1.770350000 | 0.965116000  | -4.266570000 | 1 | 7.261182000  | -1.677878000 | 1.979945000  |
| 1  | 0.800094000 | 1.196113000  | -2.801536000 | 1 | 5.925147000  | -2.810643000 | 1.912626000  |
| 1  | 1.436750000 | -0.399720000 | -3.186444000 | 6 | 7.356841000  | -0.949638000 | -0.648696000 |
| 1  | 2.944019000 | -1.373955000 | 3.193230000  | 1 | 8.115594000  | -1.666683000 | -0.938557000 |
| 1  | 5.657095000 | 5.077465000  | 0.479224000  | 1 | 7.006231000  | -0.444799000 | -1.539963000 |
| 1  | 3.679847000 | 6.461153000  | 0.838934000  | 1 | 7.823317000  | -0.218163000 | 0.000907000  |
| 1  | 1.527290000 | 5.409671000  | 1.321761000  | 6 | 5.891496000  | 2.383319000  | 0.504085000  |
| 1  | 3.558645000 | 2.177900000  | 3.503593000  | 1 | 5.567788000  | 1.418346000  | 0.151658000  |
| 1  | 3.402530000 | 0.518316000  | 4.321083000  | 6 | 6.853577000  | 2.985612000  | -0.542168000 |
| 1  | 2.169213000 | -3.791342000 | 1.125341000  | 1 | 7.317621000  | 3.894680000  | -0.177734000 |
| 1  | 3.916348000 | -3.914264000 | 1.208976000  | 1 | 7.646620000  | 2.277093000  | -0.753820000 |
| 1  | 2.999563000 | -3.458060000 | 2.657627000  | 1 | 6.340076000  | 3.208711000  | -1.469726000 |
| 1  | 7.205976000 | -3.596353000 | -1.419674000 | 6 | 6.635006000  | 2.192170000  | 1.846157000  |
| 1  | 6.084232000 | -5.110388000 | -2.977782000 | 1 | 5.993281000  | 1.711196000  | 2.570856000  |
| 1  | 3.671007000 | -4.936469000 | -3.309263000 | 1 | 7.522329000  | 1.582212000  | 1.705359000  |
| 6  | 1.669639000 | 0.669010000  | -3.210049000 | 1 | 6.943001000  | 3.156769000  | 2.236641000  |
| 1  | 4.031241000 | -0.739365000 | -3.230479000 | 6 | 0.924873000  | 2.796170000  | 1.567994000  |
| 1  | 5.072868000 | 0.510108000  | -2.553826000 | 1 | 1.076413000  | 1.744144000  | 1.739219000  |
| 6  | 4.149059000 | 0.341537000  | -3.117396000 | 6 | 0.327243000  | 3.416693000  | 2.846712000  |
| 6  | 3.136862000 | 2.510087000  | -2.428259000 | 1 | 0.133702000  | 4.474815000  | 2.719306000  |
| 1  | 3.176912000 | 2.880318000  | -3.465757000 | 1 | -0.615035000 | 2.936739000  | 3.086484000  |
| 1  | 4.061754000 | 2.809476000  | -1.934063000 | 1 | 1.004577000  | 3.285915000  | 3.681163000  |
| 1  | 2.322225000 | 3.036396000  | -1.922078000 | 6 | -0.057215000 | 2.948028000  | 0.391330000  |
| 31 | 2.734169000 | 0.237661000  | -0.588678000 | 1 | 0.361556000  | 2.517162000  | -0.507443000 |
| 6  | 1.897858000 | -3.317476000 | -2.158158000 | 1 | -0.984770000 | 2.425893000  | 0.613701000  |
| 1  | 1.507059000 | -2.471951000 | -1.615316000 | 1 | -0.286041000 | 3.991260000  | 0.206048000  |
| 6  | 1.207584000 | -4.606395000 | -1.656320000 | 7 | -2.462794000 | -0.927350000 | 1.213769000  |
| 1  | 0.134531000 | -4.552723000 | -1.821419000 | 6 | -1.442672000 | -1.357503000 | 0.456107000  |
| 1  | 1.584434000 | -5.467263000 | -2.195842000 | 6 | -1.157368000 | -0.884280000 | -0.852347000 |
| 1  | 1.391098000 | -4.767240000 | -0.602906000 | 6 | -2.063129000 | -0.183472000 | -1.812096000 |
| 6  | 1.585512000 | -3.139050000 | -3.662473000 | 7 | -3.203702000 | 0.465979000  | -1.301290000 |



|   |              |              |              |    |              |              |              |
|---|--------------|--------------|--------------|----|--------------|--------------|--------------|
| 6 | -4.104506000 | 1.104172000  | -2.256060000 | 1  | -5.816071000 | 2.440166000  | -0.284544000 |
| 6 | -5.141667000 | 0.360017000  | -2.837776000 | 31 | -3.703098000 | 0.339904000  | 0.475535000  |
| 6 | -5.994265000 | 0.987193000  | -3.734905000 | 6  | -5.352764000 | -1.125846000 | -2.554523000 |
| 6 | -5.835465000 | 2.317147000  | -4.059372000 | 1  | -4.683852000 | -1.416988000 | -1.759145000 |
| 6 | -4.809059000 | 3.039921000  | -3.491476000 | 6  | -2.784709000 | 3.289694000  | -2.034432000 |
| 6 | -3.929450000 | 2.453180000  | -2.592399000 | 1  | -2.291079000 | 2.708267000  | -1.275468000 |
| 6 | -1.755207000 | -0.221591000 | -3.122517000 | 6  | -4.999648000 | -1.972300000 | -3.798265000 |
| 6 | -0.427400000 | -2.318009000 | 0.993997000  | 1  | -5.647072000 | -1.715116000 | -4.628559000 |
| 6 | -2.825772000 | -1.636716000 | 2.448400000  | 1  | -3.972730000 | -1.803331000 | -4.090414000 |
| 6 | -3.572802000 | -2.815656000 | 2.335347000  | 1  | -5.129027000 | -3.028192000 | -3.581303000 |
| 6 | -3.958384000 | -3.469012000 | 3.496506000  | 6  | -6.802658000 | -1.420481000 | -2.110916000 |
| 6 | -3.610762000 | -2.977912000 | 4.736000000  | 1  | -6.914614000 | -2.473098000 | -1.878694000 |
| 6 | -2.872079000 | -1.818125000 | 4.832272000  | 1  | -7.068096000 | -0.845638000 | -1.232219000 |
| 6 | -2.470477000 | -1.123682000 | 3.699164000  | 1  | -7.507142000 | -1.179403000 | -2.896526000 |
| 6 | -5.088388000 | 1.333437000  | 1.472014000  | 6  | -1.753498000 | 3.604552000  | -3.141690000 |
| 1 | -6.441227000 | 1.125080000  | 3.137978000  | 1  | -2.210442000 | 4.190396000  | -3.931395000 |
| 1 | -3.592406000 | 2.283359000  | 2.778645000  | 1  | -0.926247000 | 4.173301000  | -2.730390000 |
| 1 | -5.110189000 | 3.171960000  | 2.620486000  | 1  | -1.360915000 | 2.691808000  | -3.567967000 |
| 1 | -3.934178000 | 3.196479000  | 1.301967000  | 6  | -3.288627000 | 4.604631000  | -1.399202000 |
| 1 | -0.561654000 | -1.623695000 | -1.385886000 | 1  | -4.055606000 | 4.417118000  | -0.657642000 |
| 1 | -6.786104000 | 0.428275000  | -4.190433000 | 1  | -2.464314000 | 5.119769000  | -0.918226000 |
| 1 | -6.502889000 | 2.784708000  | -4.756077000 | 1  | -3.700842000 | 5.268365000  | -2.149572000 |
| 1 | -4.681757000 | 4.069838000  | -3.755947000 | 6  | -3.990506000 | -3.411929000 | 0.991974000  |
| 1 | -2.357840000 | 0.277051000  | -3.868040000 | 1  | -3.555136000 | -2.829062000 | 0.195457000  |
| 1 | -0.867427000 | -0.743900000 | -3.454156000 | 6  | -5.524927000 | -3.351530000 | 0.835113000  |
| 1 | -0.621727000 | -2.622586000 | 2.017972000  | 1  | -6.016006000 | -3.903898000 | 1.626419000  |
| 1 | -0.369035000 | -3.200041000 | 0.354113000  | 1  | -5.872382000 | -2.325679000 | 0.872905000  |
| 1 | 0.552474000  | -1.814977000 | 0.943020000  | 1  | -5.823183000 | -3.777842000 | -0.115277000 |
| 1 | -4.532212000 | -4.370583000 | 3.429174000  | 6  | -3.488489000 | -4.863916000 | 0.834475000  |
| 1 | -3.911765000 | -3.497651000 | 5.623759000  | 1  | -3.732782000 | -5.232298000 | -0.155934000 |
| 1 | -2.600404000 | -1.449012000 | 5.798819000  | 1  | -2.415013000 | -4.921293000 | 0.966487000  |
| 6 | -4.379408000 | 2.560050000  | 2.072373000  | 1  | -3.955497000 | -5.518325000 | 1.560007000  |
| 1 | -4.976780000 | 0.147601000  | 3.320142000  | 6  | -1.624029000 | 0.133832000  | 3.860070000  |
| 1 | -6.253635000 | -0.368218000 | 2.215497000  | 1  | -1.650983000 | 0.680038000  | 2.928183000  |
| 6 | -5.713219000 | 0.502973000  | 2.597062000  | 6  | -2.149987000 | 1.052027000  | 4.986355000  |
| 6 | -6.194600000 | 1.812967000  | 0.525510000  | 1  | -1.615890000 | 1.993755000  | 4.964803000  |
| 1 | -6.922017000 | 2.406071000  | 1.098698000  | 1  | -3.209063000 | 1.251971000  | 4.880408000  |
| 1 | -6.736769000 | 0.980132000  | 0.071387000  | 1  | -1.982967000 | 0.607558000  | 5.959540000  |

|                                   |              |              |              |    |              |              |              |
|-----------------------------------|--------------|--------------|--------------|----|--------------|--------------|--------------|
| 6                                 | -0.157436000 | -0.253417000 | 4.154211000  | 1  | -2.228132000 | 3.683657000  | 1.381369000  |
| 1                                 | -0.104481000 | -0.815385000 | 5.080350000  | 1  | -3.973554000 | 3.843742000  | 1.430681000  |
| 1                                 | 0.260576000  | -0.857355000 | 3.362127000  | 1  | -3.108712000 | 3.246847000  | 2.859896000  |
| 1                                 | 0.462545000  | 0.628534000  | 4.247555000  | 1  | -7.199821000 | 3.826005000  | -1.313440000 |
| <i>Ga-inter-IM<sub>1,4'</sub></i> |              |              |              | 1  | -5.989677000 | 5.430046000  | -2.708758000 |
| 1                                 | 0.924143000  | -0.511172000 | -0.697040000 | 1  | -3.571992000 | 5.213586000  | -2.981248000 |
| 1                                 | -1.165528000 | -0.095928000 | -0.150639000 | 6  | -1.597296000 | -0.497185000 | -3.220518000 |
| 7                                 | -3.370261000 | 1.604900000  | -0.108263000 | 1  | -3.868843000 | 1.066552000  | -3.252381000 |
| 6                                 | -3.265499000 | 1.798702000  | 1.266738000  | 1  | -5.014544000 | -0.164084000 | -2.737400000 |
| 6                                 | -3.221203000 | 0.796732000  | 2.193767000  | 6  | -4.049563000 | -0.011134000 | -3.233077000 |
| 6                                 | -3.466448000 | -0.657775000 | 2.092044000  | 6  | -3.225592000 | -2.278270000 | -2.659676000 |
| 7                                 | -3.531555000 | -1.230457000 | 0.828856000  | 1  | -3.238219000 | -2.566027000 | -3.725083000 |
| 6                                 | -3.678915000 | -2.662282000 | 0.726452000  | 1  | -4.195012000 | -2.545967000 | -2.235276000 |
| 6                                 | -4.923238000 | -3.217234000 | 0.387732000  | 1  | -2.479899000 | -2.903228000 | -2.158548000 |
| 6                                 | -5.041300000 | -4.590895000 | 0.242185000  | 31 | -2.723318000 | -0.192088000 | -0.610491000 |
| 6                                 | -3.954091000 | -5.423237000 | 0.412467000  | 6  | -1.880343000 | 3.452503000  | -1.909849000 |
| 6                                 | -2.732264000 | -4.880998000 | 0.744944000  | 1  | -1.534989000 | 2.562796000  | -1.407253000 |
| 6                                 | -2.578487000 | -3.511902000 | 0.915428000  | 6  | -1.172997000 | 4.689594000  | -1.309950000 |
| 6                                 | -3.657635000 | -1.339005000 | 3.259049000  | 1  | -0.097677000 | 4.628915000  | -1.461845000 |
| 6                                 | -3.142324000 | 3.222756000  | 1.768592000  | 1  | -1.523620000 | 5.592879000  | -1.794870000 |
| 6                                 | -4.068595000 | 2.620773000  | -0.864008000 | 1  | -1.371943000 | 4.781473000  | -0.250810000 |
| 6                                 | -5.468571000 | 2.720951000  | -0.756154000 | 6  | -1.525205000 | 3.355509000  | -3.411481000 |
| 6                                 | -6.136371000 | 3.741476000  | -1.413951000 | 1  | -2.069336000 | 2.554564000  | -3.890900000 |
| 6                                 | -5.459116000 | 4.645842000  | -2.204971000 | 1  | -1.762806000 | 4.280754000  | -3.922760000 |
| 6                                 | -4.096015000 | 4.521200000  | -2.352522000 | 1  | -0.460937000 | 3.175175000  | -3.536000000 |
| 6                                 | -3.387547000 | 3.523216000  | -1.695889000 | 6  | -6.275256000 | 1.714643000  | 0.059272000  |
| 6                                 | -2.934146000 | -0.782586000 | -2.524257000 | 1  | -5.610261000 | 0.914516000  | 0.337638000  |
| 1                                 | -4.154916000 | -0.353648000 | -4.276435000 | 6  | -6.841207000 | 2.352065000  | 1.346964000  |
| 1                                 | -1.651253000 | -0.732573000 | -4.296570000 | 1  | -7.502838000 | 3.177455000  | 1.105076000  |
| 1                                 | -0.785277000 | -1.100726000 | -2.793328000 | 1  | -7.404367000 | 1.615181000  | 1.910421000  |
| 1                                 | -1.300278000 | 0.553292000  | -3.127394000 | 1  | -6.044881000 | 2.719478000  | 1.980123000  |
| 1                                 | -3.090266000 | 1.123861000  | 3.220023000  | 6  | -7.430219000 | 1.120177000  | -0.776526000 |
| 1                                 | -5.989864000 | -5.017083000 | -0.012676000 | 1  | -8.162136000 | 1.876949000  | -1.033741000 |
| 1                                 | -4.060267000 | -6.483391000 | 0.287559000  | 1  | -7.056219000 | 0.680375000  | -1.692732000 |
| 1                                 | -1.888560000 | -5.529810000 | 0.876556000  | 1  | -7.936052000 | 0.349675000  | -0.206354000 |
| 1                                 | -3.876307000 | -2.397506000 | 3.275044000  | 6  | -6.142254000 | -2.322917000 | 0.201121000  |
| 1                                 | -3.641021000 | -0.805758000 | 4.201751000  | 1  | -5.773026000 | -1.346388000 | -0.062771000 |
|                                   |              |              |              | 6  | -7.088269000 | -2.809658000 | -0.917016000 |

|   |              |              |              |    |              |              |              |
|---|--------------|--------------|--------------|----|--------------|--------------|--------------|
| 1 | -7.586985000 | -3.732407000 | -0.643107000 | 1  | 3.250407000  | -2.577787000 | 2.741332000  |
| 1 | -7.855533000 | -2.063858000 | -1.093062000 | 1  | 4.694085000  | -3.589147000 | 2.648375000  |
| 1 | -6.550813000 | -2.970368000 | -1.844266000 | 1  | 3.618705000  | -3.461166000 | 1.252600000  |
| 6 | -6.917332000 | -2.211732000 | 1.533984000  | 1  | 0.448525000  | 1.019322000  | -1.356899000 |
| 1 | -6.278870000 | -1.812301000 | 2.309790000  | 1  | 7.495801000  | -0.230437000 | -3.729969000 |
| 1 | -7.778799000 | -1.559948000 | 1.420399000  | 1  | 6.984453000  | -2.399314000 | -4.724904000 |
| 1 | -7.269471000 | -3.192010000 | 1.839688000  | 1  | 4.907538000  | -3.550302000 | -4.151348000 |
| 6 | -1.205974000 | -2.972223000 | 1.309356000  | 1  | 3.213845000  | 0.929923000  | -3.712956000 |
| 1 | -1.303903000 | -1.915762000 | 1.490325000  | 1  | 1.496752000  | 1.519645000  | -3.318812000 |
| 6 | -0.691890000 | -3.647981000 | 2.597077000  | 1  | 0.579126000  | 2.523749000  | 1.911162000  |
| 1 | -0.563480000 | -4.714929000 | 2.458983000  | 1  | 0.378290000  | 2.904662000  | 0.169196000  |
| 1 | 0.271350000  | -3.233051000 | 2.878547000  | 1  | -0.551975000 | 1.589584000  | 0.857045000  |
| 1 | -1.390193000 | -3.483176000 | 3.407181000  | 1  | 4.408998000  | 4.060235000  | 3.744201000  |
| 6 | -0.190076000 | -3.163370000 | 0.162988000  | 1  | 3.587246000  | 3.133235000  | 5.847707000  |
| 1 | -0.537088000 | -2.654416000 | -0.726063000 | 1  | 2.230697000  | 1.107009000  | 5.848727000  |
| 1 | 0.777137000  | -2.746745000 | 0.445905000  | 6  | 4.059369000  | -2.895098000 | 2.079741000  |
| 1 | -0.048925000 | -4.213475000 | -0.066407000 | 1  | 4.792484000  | -0.585310000 | 3.465840000  |
| 7 | 2.439503000  | 0.744644000  | 1.254784000  | 1  | 6.182151000  | -0.155795000 | 2.459679000  |
| 6 | 1.444740000  | 1.126366000  | 0.507367000  | 6  | 5.540687000  | -0.984312000 | 2.777616000  |
| 6 | 1.277458000  | 0.517902000  | -0.860421000 | 6  | 6.031662000  | -2.263925000 | 0.682280000  |
| 6 | 2.486725000  | 0.495455000  | -1.771715000 | 1  | 6.646333000  | -2.965037000 | 1.264496000  |
| 7 | 3.594158000  | -0.220712000 | -1.277951000 | 1  | 6.691865000  | -1.476768000 | 0.312960000  |
| 6 | 4.530557000  | -0.803194000 | -2.232122000 | 1  | 5.646691000  | -2.801720000 | -0.187189000 |
| 6 | 5.714661000  | -0.135675000 | -2.562922000 | 31 | 3.755453000  | -0.527674000 | 0.533769000  |
| 6 | 6.587324000  | -0.731825000 | -3.464176000 | 6  | 6.074712000  | 1.230973000  | -1.988061000 |
| 6 | 6.300797000  | -1.954832000 | -4.029036000 | 1  | 5.306964000  | 1.505776000  | -1.282087000 |
| 6 | 5.127752000  | -2.603496000 | -3.701882000 | 6  | 2.929133000  | -2.790634000 | -2.507463000 |
| 6 | 4.226595000  | -2.046151000 | -2.808380000 | 1  | 2.411220000  | -2.260063000 | -1.725480000 |
| 6 | 2.406175000  | 1.025971000  | -2.999217000 | 6  | 6.110663000  | 2.307022000  | -3.096219000 |
| 6 | 0.420023000  | 2.110566000  | 0.919218000  | 1  | 6.877895000  | 2.079841000  | -3.826700000 |
| 6 | 2.735303000  | 1.403391000  | 2.543487000  | 1  | 5.158253000  | 2.368699000  | -3.605483000 |
| 6 | 3.519938000  | 2.560136000  | 2.522567000  | 1  | 6.331558000  | 3.278765000  | -2.666041000 |
| 6 | 3.816451000  | 3.168725000  | 3.733345000  | 6  | 7.432959000  | 1.188930000  | -1.252938000 |
| 6 | 3.353989000  | 2.646619000  | 4.921799000  | 1  | 7.667040000  | 2.162252000  | -0.837680000 |
| 6 | 2.588757000  | 1.499737000  | 4.920700000  | 1  | 7.416363000  | 0.467905000  | -0.445020000 |
| 6 | 2.265986000  | 0.850312000  | 3.737008000  | 1  | 8.231512000  | 0.915103000  | -1.930753000 |
| 6 | 4.917503000  | -1.719164000 | 1.585499000  | 6  | 2.014673000  | -2.814114000 | -3.752540000 |
| 1 | 6.172435000  | -1.686364000 | 3.340044000  | 1  | 2.487359000  | -3.360091000 | -4.560890000 |



|    |              |              |              |                                  |              |              |              |
|----|--------------|--------------|--------------|----------------------------------|--------------|--------------|--------------|
| 6  | -3.382276000 | 3.139279000  | 1.550785000  | <i>AI-intra-TS<sub>1,4</sub></i> |              |              |              |
| 1  | -4.450337000 | 3.289209000  | 1.435995000  | 1                                | -0.958449000 | -1.961953000 | 1.940222000  |
| 1  | -3.207579000 | 2.464382000  | 2.374819000  | 1                                | -0.347927000 | -2.258476000 | 1.156491000  |
| 1  | -2.926317000 | 4.096984000  | 1.783062000  | 7                                | 1.442862000  | 0.062090000  | 0.681490000  |
| 6  | -2.960398000 | 3.614950000  | -0.882821000 | 6                                | 1.220755000  | 0.502635000  | 1.963430000  |
| 1  | -2.382787000 | 4.502176000  | -0.644405000 | 6                                | 0.010349000  | 0.353349000  | 2.589606000  |
| 1  | -2.628145000 | 3.237850000  | -1.840032000 | 6                                | -1.220349000 | -0.169960000 | 2.020606000  |
| 1  | -3.996734000 | 3.916769000  | -0.975351000 | 7                                | -1.454486000 | -0.055771000 | 0.666813000  |
| 6  | -3.380874000 | -3.137987000 | 1.551056000  | 6                                | -2.816774000 | 0.253083000  | 0.221005000  |
| 1  | -4.449324000 | -3.286854000 | 1.438462000  | 6                                | -3.108147000 | 1.624889000  | 0.096622000  |
| 1  | -2.925417000 | -4.096078000 | 1.782728000  | 6                                | -2.060728000 | 2.694505000  | 0.392543000  |
| 1  | -3.203844000 | -2.462978000 | 2.374490000  | 6                                | -2.382716000 | 3.406107000  | 1.724825000  |
| 6  | -2.964174000 | -3.615253000 | -0.883064000 | 6                                | -1.945638000 | 3.721641000  | -0.754193000 |
| 1  | -2.634251000 | -3.238732000 | -1.841315000 | 6                                | -4.378172000 | 2.022096000  | -0.282805000 |
| 1  | -2.386135000 | -4.502457000 | -0.645617000 | 6                                | -5.360394000 | 1.093309000  | -0.554869000 |
| 1  | -4.000788000 | -3.916964000 | -0.972815000 | 6                                | -5.067691000 | -0.246227000 | -0.457693000 |
| 6  | 2.823364000  | 2.555688000  | 0.310604000  | 6                                | -3.806857000 | -0.696401000 | -0.076433000 |
| 1  | 1.947555000  | 2.355044000  | 0.907873000  | 6                                | -3.604080000 | -2.212092000 | -0.030640000 |
| 6  | 2.381509000  | 3.351802000  | -0.936030000 | 6                                | -4.549820000 | -2.891509000 | 0.990704000  |
| 1  | 3.225768000  | 3.546390000  | -1.587181000 | 6                                | -3.876316000 | -2.850749000 | -1.415223000 |
| 1  | 1.639605000  | 2.802755000  | -1.500701000 | 6                                | -1.920587000 | -1.109289000 | 2.776876000  |
| 1  | 1.949310000  | 4.302831000  | -0.642567000 | 6                                | 2.358073000  | 1.123234000  | 2.731378000  |
| 6  | 3.793598000  | 3.407682000  | 1.159074000  | 6                                | 2.766150000  | 0.196175000  | 0.096423000  |
| 1  | 3.291993000  | 4.307655000  | 1.498815000  | 6                                | 3.081007000  | 1.315830000  | -0.683226000 |
| 1  | 4.136044000  | 2.859076000  | 2.027901000  | 6                                | 4.326440000  | 1.376627000  | -1.292869000 |
| 1  | 4.660416000  | 3.705713000  | 0.581686000  | 6                                | 5.244725000  | 0.359746000  | -1.139096000 |
| 6  | 2.823315000  | -2.555338000 | 0.313568000  | 6                                | 4.935858000  | -0.729725000 | -0.351115000 |
| 1  | 1.947447000  | -2.353983000 | 0.910515000  | 6                                | 3.706523000  | -0.827056000 | 0.283600000  |
| 6  | 2.381570000  | -3.352981000 | -0.932125000 | 6                                | 3.420671000  | -2.038124000 | 1.173524000  |
| 1  | 1.949400000  | -4.303673000 | -0.637525000 | 6                                | 4.519648000  | -2.229746000 | 2.243163000  |
| 1  | 1.639677000  | -2.804661000 | -1.497513000 | 6                                | 3.279573000  | -3.328349000 | 0.336959000  |
| 1  | 3.225881000  | -3.548329000 | -1.582981000 | 6                                | 2.105617000  | 2.477110000  | -0.867062000 |
| 6  | 3.793452000  | -3.406324000 | 1.163173000  | 6                                | 1.758011000  | 2.702737000  | -2.354906000 |
| 1  | 4.660289000  | -3.705108000 | 0.586205000  | 6                                | 2.680345000  | 3.782346000  | -0.269996000 |
| 1  | 4.135867000  | -2.856660000 | 2.031341000  | 6                                | 0.127651000  | -1.541819000 | -2.007398000 |
| 1  | 3.291780000  | -4.305850000 | 1.503996000  | 1                                | 1.403832000  | -1.745705000 | -3.741304000 |
| 13 | 0.025576000  | -0.000312000 | -0.383828000 | 1                                | -0.356400000 | -3.341787000 | -3.129622000 |
|    |              |              |              | 1                                | -1.214130000 | -3.246210000 | -1.586716000 |

|   |              |              |              |    |                     |              |              |
|---|--------------|--------------|--------------|----|---------------------|--------------|--------------|
| 1 | 0.496329000  | -3.666887000 | -1.615505000 | 1  | 1.952195000         | 4.582356000  | -0.355529000 |
| 1 | -0.023516000 | 0.542540000  | 3.656282000  | 1  | 2.929510000         | 3.660514000  | 0.776389000  |
| 1 | -1.111672000 | 2.198851000  | 0.495938000  | 1  | 3.577196000         | 4.084167000  | -0.798232000 |
| 1 | -1.618838000 | 4.142559000  | 1.953813000  | 6  | -0.263997000        | -3.028058000 | -2.077854000 |
| 1 | -3.339583000 | 3.912897000  | 1.664942000  | 1  | 2.276012000         | -1.981054000 | -2.223017000 |
| 1 | -2.423893000 | 2.692725000  | 2.538929000  | 1  | 1.837506000         | -0.359967000 | -2.733531000 |
| 1 | -1.126271000 | 4.404706000  | -0.552778000 | 6  | 1.489725000         | -1.393168000 | -2.700775000 |
| 1 | -2.849214000 | 4.310939000  | -0.855126000 | 6  | -0.890678000        | -0.706760000 | -2.808291000 |
| 1 | -1.754271000 | 3.224318000  | -1.698087000 | 1  | -0.946356000        | -1.078083000 | -3.843955000 |
| 1 | -4.602745000 | 3.066178000  | -0.364121000 | 1  | -0.597088000        | 0.347716000  | -2.859869000 |
| 1 | -6.342243000 | 1.411962000  | -0.844800000 | 1  | -1.899841000        | -0.738249000 | -2.391757000 |
| 1 | -5.831261000 | -0.963230000 | -0.680081000 | 13 | 0.037292000         | -0.911448000 | -0.120163000 |
| 1 | -2.582090000 | -2.417649000 | 0.249459000  |    |                     |              |              |
| 1 | -4.478176000 | -2.454367000 | 1.976198000  |    | AI-P <sub>1,4</sub> |              |              |
| 1 | -4.311227000 | -3.947191000 | 1.066416000  | 1  | 0.044284000         | -2.381450000 | -0.453619000 |
| 1 | -5.579154000 | -2.804006000 | 0.664833000  | 7  | 1.454137000         | -0.233694000 | 0.695405000  |
| 1 | -3.632247000 | -3.907607000 | -1.389287000 | 6  | 1.269941000         | -0.388959000 | 2.007159000  |
| 1 | -4.923825000 | -2.757754000 | -1.674121000 | 6  | 0.007660000         | -0.597062000 | 2.590089000  |
| 1 | -3.294375000 | -2.382863000 | -2.194382000 | 6  | -1.257523000        | -0.445805000 | 1.999840000  |
| 1 | -2.898778000 | -1.434710000 | 2.461342000  | 7  | -1.437819000        | -0.262708000 | 0.689348000  |
| 1 | -1.679895000 | -1.215225000 | 3.830431000  | 6  | -2.771874000        | 0.026293000  | 0.167021000  |
| 1 | 2.028808000  | 1.406023000  | 3.731782000  | 6  | -3.144309000        | 1.365965000  | -0.028054000 |
| 1 | 3.202654000  | 0.438312000  | 2.812929000  | 6  | -2.223940000        | 2.513770000  | 0.389931000  |
| 1 | 2.721399000  | 2.014252000  | 2.217444000  | 6  | -2.491818000        | 2.907056000  | 1.861909000  |
| 1 | 4.578848000  | 2.226312000  | -1.894968000 | 6  | -2.371629000        | 3.773095000  | -0.490848000 |
| 1 | 6.198877000  | 0.418713000  | -1.624652000 | 6  | -4.389075000        | 1.635018000  | -0.573854000 |
| 1 | 5.659087000  | -1.510464000 | -0.227112000 | 6  | -5.248033000        | 0.612142000  | -0.926191000 |
| 1 | 2.484079000  | -1.873499000 | 1.682338000  | 6  | -4.877869000        | -0.696954000 | -0.717918000 |
| 1 | 4.239257000  | -3.031822000 | 2.917700000  | 6  | -3.644705000        | -1.016623000 | -0.160946000 |
| 1 | 5.466758000  | -2.492596000 | 1.787815000  | 6  | -3.323455000        | -2.487072000 | 0.113897000  |
| 1 | 4.663017000  | -1.328090000 | 2.826085000  | 6  | -4.365133000        | -3.102650000 | 1.078489000  |
| 1 | 3.096118000  | -4.177721000 | 0.986613000  | 6  | -3.277416000        | -3.319801000 | -1.185073000 |
| 1 | 2.452337000  | -3.248842000 | -0.354650000 | 6  | -2.427700000        | -0.535356000 | 2.952994000  |
| 1 | 4.182680000  | -3.519272000 | -0.231018000 | 6  | 2.433358000         | -0.382791000 | 2.972875000  |
| 1 | 1.195886000  | 2.233694000  | -0.341783000 | 6  | 2.793836000         | 0.038040000  | 0.179282000  |
| 1 | 1.042916000  | 3.512872000  | -2.449695000 | 6  | 3.154917000         | 1.363224000  | -0.097582000 |
| 1 | 1.323996000  | 1.813726000  | -2.791066000 | 6  | 4.415426000         | 1.614064000  | -0.615897000 |
| 1 | 2.641691000  | 2.965212000  | -2.924555000 | 6  | 5.296328000         | 0.581808000  | -0.871744000 |



|   |              |              |              |    |              |              |              |
|---|--------------|--------------|--------------|----|--------------|--------------|--------------|
| 6 | -5.333108000 | 0.798061000  | -0.725333000 | 1  | -5.228476000 | -2.757720000 | 1.335871000  |
| 6 | -4.997795000 | -0.523298000 | -0.518277000 | 1  | -3.835841000 | -2.291534000 | 2.309055000  |
| 6 | -3.735027000 | -0.882463000 | -0.068421000 | 1  | -3.482735000 | -4.255647000 | -0.875744000 |
| 6 | -3.434328000 | -2.359907000 | 0.174203000  | 1  | -4.911797000 | -3.280273000 | -1.144095000 |
| 6 | -4.154510000 | -2.860045000 | 1.446879000  | 1  | -3.410407000 | -2.865507000 | -1.952626000 |
| 6 | -3.835158000 | -3.240879000 | -1.030150000 | 1  | -3.275186000 | 0.227773000  | 2.694412000  |
| 6 | -2.267260000 | -0.042395000 | 2.975465000  | 1  | -2.028722000 | -0.117012000 | 4.028871000  |
| 6 | 2.402192000  | 0.002894000  | 3.005728000  | 1  | 2.529369000  | -0.903426000 | 3.604436000  |
| 6 | 2.790149000  | 0.211428000  | 0.136731000  | 1  | 3.347313000  | 0.252965000  | 2.531857000  |
| 6 | 3.045236000  | 1.490822000  | -0.368720000 | 1  | 2.122699000  | 0.807617000  | 3.691831000  |
| 6 | 4.287797000  | 1.749960000  | -0.926381000 | 1  | 4.503136000  | 2.724269000  | -1.312166000 |
| 6 | 5.253602000  | 0.767518000  | -0.997022000 | 1  | 6.206853000  | 0.982333000  | -1.437970000 |
| 6 | 4.990704000  | -0.489803000 | -0.499212000 | 1  | 5.745477000  | -1.247211000 | -0.558847000 |
| 6 | 3.765361000  | -0.791764000 | 0.079935000  | 1  | 2.597223000  | -2.230193000 | 1.141324000  |
| 6 | 3.541611000  | -2.203114000 | 0.623142000  | 1  | 4.402327000  | -3.576915000 | 2.060364000  |
| 6 | 4.647015000  | -2.615521000 | 1.621381000  | 1  | 5.604592000  | -2.711952000 | 1.124629000  |
| 6 | 3.470635000  | -3.226551000 | -0.530524000 | 1  | 4.750378000  | -1.890857000 | 2.419380000  |
| 6 | 2.003007000  | 2.600926000  | -0.275580000 | 1  | 3.300348000  | -4.223166000 | -0.137156000 |
| 6 | 1.997475000  | 3.526054000  | -1.510137000 | 1  | 2.661951000  | -2.985523000 | -1.205771000 |
| 6 | 2.239758000  | 3.432987000  | 1.005146000  | 1  | 4.396346000  | -3.233910000 | -1.093748000 |
| 6 | 0.000570000  | -1.040985000 | -2.293714000 | 1  | 1.031247000  | 2.140223000  | -0.197749000 |
| 1 | 1.240054000  | -0.738615000 | -4.045058000 | 1  | 1.158603000  | 4.208346000  | -1.446376000 |
| 1 | -0.218970000 | -2.686030000 | -3.697280000 | 1  | 1.904381000  | 2.955487000  | -2.426302000 |
| 1 | -1.065927000 | -2.965356000 | -2.170486000 | 1  | 2.900503000  | 4.121893000  | -1.564443000 |
| 1 | 0.690726000  | -3.131670000 | -2.249224000 | 1  | 1.488935000  | 4.211064000  | 1.095164000  |
| 1 | 0.075919000  | -0.880661000 | 3.586389000  | 1  | 2.188943000  | 2.808579000  | 1.888146000  |
| 1 | -1.194550000 | 2.145568000  | 0.496367000  | 1  | 3.218127000  | 3.899175000  | 0.970747000  |
| 1 | -1.877703000 | 4.220285000  | 1.671673000  | 6  | -0.157424000 | -2.539919000 | -2.607588000 |
| 1 | -3.558240000 | 3.906435000  | 1.262032000  | 1  | 2.188289000  | -1.039181000 | -2.582014000 |
| 1 | -2.694822000 | 2.811723000  | 2.339146000  | 1  | 1.434153000  | 0.533176000  | -2.833243000 |
| 1 | -1.207852000 | 4.267808000  | -0.771868000 | 6  | 1.291255000  | -0.543742000 | -2.962134000 |
| 1 | -2.872696000 | 4.005071000  | -1.248719000 | 6  | -1.180459000 | -0.292220000 | -2.934547000 |
| 1 | -1.617034000 | 2.930666000  | -1.840569000 | 1  | -1.173925000 | -0.461931000 | -4.022821000 |
| 1 | -4.667780000 | 2.809861000  | -0.638838000 | 1  | -1.118847000 | 0.789160000  | -2.775304000 |
| 1 | -6.314876000 | 1.056921000  | -1.070539000 | 1  | -2.149361000 | -0.623275000 | -2.553189000 |
| 1 | -5.728496000 | -1.284482000 | -0.702957000 | 1  | 0.148616000  | -1.853097000 | 1.587942000  |
| 1 | -2.372900000 | -2.462972000 | 0.332700000  | 1  | 0.216395000  | -2.255378000 | 0.711420000  |
| 1 | -3.927789000 | -3.908168000 | 1.617874000  | 13 | -0.003197000 | -0.775890000 | -0.322468000 |



|                                  |              |              |              |   |              |              |              |
|----------------------------------|--------------|--------------|--------------|---|--------------|--------------|--------------|
|                                  |              |              |              | 1 | -0.068727000 | -1.341052000 | -3.446547000 |
| <i>AI-intra-IM<sub>1,4</sub></i> |              |              |              | 1 | 1.157958000  | 2.091536000  | -0.376444000 |
| 7                                | -1.487950000 | -0.317021000 | -0.653286000 | 1 | 1.749061000  | 3.885060000  | -2.018381000 |
| 6                                | -1.305683000 | -0.541891000 | -1.911519000 | 1 | 3.447385000  | 3.463874000  | -1.840488000 |
| 6                                | -0.039350000 | -1.218942000 | -2.363462000 | 1 | 2.322293000  | 2.307663000  | -2.545696000 |
| 6                                | 1.272320000  | -0.559363000 | -1.973221000 | 1 | 1.404481000  | 4.371319000  | 0.431725000  |
| 7                                | 1.420555000  | -0.345930000 | -0.607536000 | 1 | 3.140300000  | 4.216736000  | 0.553924000  |
| 6                                | 2.758300000  | 0.026685000  | -0.170531000 | 1 | 2.104583000  | 3.317658000  | 1.652496000  |
| 6                                | 3.120372000  | 1.378098000  | -0.045515000 | 1 | 4.695582000  | 2.722244000  | 0.456498000  |
| 6                                | 2.150901000  | 2.509478000  | -0.381934000 | 1 | 6.321680000  | 0.974092000  | 0.959175000  |
| 6                                | 2.436242000  | 3.073868000  | -1.793870000 | 1 | 5.699010000  | -1.375869000 | 0.724683000  |
| 6                                | 2.207912000  | 3.670917000  | 0.636199000  | 1 | 2.336178000  | -2.569049000 | -0.272509000 |
| 6                                | 4.408673000  | 1.695001000  | 0.361755000  | 1 | 3.908150000  | -4.062060000 | -1.469488000 |
| 6                                | 5.331046000  | 0.709986000  | 0.644421000  | 1 | 5.224054000  | -2.936029000 | -1.166920000 |
| 6                                | 4.975298000  | -0.614571000 | 0.514108000  | 1 | 3.885481000  | -2.464473000 | -2.208933000 |
| 6                                | 3.700474000  | -0.978943000 | 0.103382000  | 1 | 3.435870000  | -4.335314000 | 0.998740000  |
| 6                                | 3.392653000  | -2.464360000 | -0.089269000 | 1 | 4.812440000  | -3.306477000 | 1.341983000  |
| 6                                | 4.153080000  | -3.014994000 | -1.317865000 | 1 | 3.243166000  | -2.932923000 | 2.037906000  |
| 6                                | 3.744842000  | -3.306983000 | 1.156147000  | 1 | 3.157648000  | 0.069197000  | -2.734157000 |
| 6                                | 2.173231000  | -0.322065000 | -2.949974000 | 1 | 1.929182000  | -0.550782000 | -3.979966000 |
| 6                                | -2.311352000 | -0.269975000 | -2.989004000 | 1 | -2.561428000 | -1.216280000 | -3.479768000 |
| 6                                | -2.808830000 | 0.117859000  | -0.171159000 | 1 | -3.218678000 | 0.202292000  | -2.623835000 |
| 6                                | -3.030853000 | 1.468884000  | 0.104987000  | 1 | -1.835140000 | 0.360279000  | -3.746908000 |
| 6                                | -4.285816000 | 1.846349000  | 0.557906000  | 1 | -4.484031000 | 2.876289000  | 0.768124000  |
| 6                                | -5.283433000 | 0.912265000  | 0.749582000  | 1 | -6.246227000 | 1.222059000  | 1.104614000  |
| 6                                | -5.038629000 | -0.418529000 | 0.492051000  | 1 | -5.814976000 | -1.138044000 | 0.653850000  |
| 6                                | -3.801688000 | -0.845758000 | 0.027529000  | 1 | -2.584234000 | -2.494063000 | -0.586747000 |
| 6                                | -3.592691000 | -2.337357000 | -0.240092000 | 1 | -4.360250000 | -3.891520000 | -1.543963000 |
| 6                                | -4.573210000 | -2.852038000 | -1.318443000 | 1 | -5.597056000 | -2.788408000 | -0.969932000 |
| 6                                | -3.755525000 | -3.160409000 | 1.056194000  | 1 | -4.493668000 | -2.279284000 | -2.234493000 |
| 6                                | -1.943892000 | 2.518885000  | -0.104921000 | 1 | -3.578978000 | -4.210371000 | 0.849042000  |
| 6                                | -1.963901000 | 3.615586000  | 0.981164000  | 1 | -3.043785000 | -2.837787000 | 1.802208000  |
| 6                                | -2.086684000 | 3.171804000  | -1.498436000 | 1 | -4.755173000 | -3.056697000 | 1.461068000  |
| 6                                | 0.045980000  | -0.318365000 | 2.479193000  | 1 | -0.987294000 | 2.022817000  | -0.059462000 |
| 1                                | -1.303322000 | -0.264197000 | 4.181272000  | 1 | -1.078220000 | 4.232268000  | 0.885604000  |
| 1                                | 0.951792000  | -1.102880000 | 4.296970000  | 1 | -1.975182000 | 3.185191000  | 1.974049000  |
| 1                                | 1.999647000  | -1.232321000 | 2.879146000  | 1 | -2.826897000 | 4.261704000  | 0.872751000  |
| 1                                | 0.639044000  | -2.353832000 | 3.081676000  | 1 | -1.308109000 | 3.912255000  | -1.647142000 |

|                                  |              |              |              |   |              |              |              |
|----------------------------------|--------------|--------------|--------------|---|--------------|--------------|--------------|
| 1                                | -2.007387000 | 2.437218000  | -2.288623000 | 6 | 4.927520000  | -0.920197000 | -0.559910000 |
| 1                                | -3.049917000 | 3.662495000  | -1.582432000 | 6 | 3.638251000  | -1.112913000 | -0.078011000 |
| 6                                | 0.960901000  | -1.313949000 | 3.215289000  | 6 | 3.138238000  | -2.542415000 | 0.129654000  |
| 1                                | -1.785369000 | -1.434099000 | 2.950588000  | 6 | 4.073306000  | -3.346641000 | 1.061199000  |
| 1                                | -2.059830000 | 0.291810000  | 2.680701000  | 6 | 3.002178000  | -3.268691000 | -1.226749000 |
| 6                                | -1.355702000 | -0.436847000 | 3.093604000  | 6 | 2.485633000  | 2.548322000  | 0.201556000  |
| 6                                | 0.585712000  | 1.086698000  | 2.750636000  | 6 | 2.677680000  | 3.628334000  | -0.886051000 |
| 1                                | 0.564188000  | 1.299068000  | 3.832641000  | 6 | 2.792742000  | 3.165483000  | 1.585301000  |
| 1                                | -0.003930000 | 1.864718000  | 2.257595000  | 6 | -0.012956000 | 0.371529000  | -2.348289000 |
| 1                                | 1.621844000  | 1.188170000  | 2.418309000  | 1 | 1.304786000  | 0.608601000  | -4.060493000 |
| 1                                | -0.060927000 | -2.222824000 | -1.908149000 | 1 | -1.007082000 | -0.048189000 | -4.238680000 |
| 1                                | -0.241614000 | -2.487012000 | 0.399589000  | 1 | -2.010001000 | -0.426348000 | -2.830316000 |
| 13                               | 0.046685000  | -0.913526000 | 0.570786000  | 1 | -0.673964000 | -1.500932000 | -3.284208000 |
| <i>Al-intra-TS<sub>4,4</sub></i> |              |              |              | 1 | 0.033926000  | -0.049770000 | 3.677116000  |
| 7                                | 1.488139000  | -0.133946000 | 0.694467000  | 1 | -1.694479000 | 2.316391000  | 0.490529000  |
| 6                                | 1.307712000  | -0.225902000 | 2.010314000  | 1 | -2.700924000 | 3.674675000  | 2.322911000  |
| 6                                | 0.041990000  | -0.316399000 | 2.624738000  | 1 | -4.272026000 | 2.957327000  | 1.982448000  |
| 6                                | -1.309384000 | -0.224157000 | 1.995315000  | 1 | -2.971807000 | 1.959574000  | 2.611972000  |
| 7                                | -1.461886000 | -0.102444000 | 0.677663000  | 1 | -2.432739000 | 4.545461000  | -0.062283000 |
| 6                                | -2.835272000 | -0.051545000 | 0.159613000  | 1 | -4.095412000 | 4.040898000  | -0.256117000 |
| 6                                | -3.440493000 | 1.207541000  | 0.010668000  | 1 | -2.882622000 | 3.528161000  | -1.421678000 |
| 6                                | -2.759809000 | 2.485873000  | 0.499965000  | 1 | -5.188252000 | 2.222063000  | -0.658886000 |
| 6                                | -3.201660000 | 2.785011000  | 1.953302000  | 1 | -6.360773000 | 0.196158000  | -1.349351000 |
| 6                                | -3.066523000 | 3.721801000  | -0.373690000 | 1 | -5.320226000 | -1.988064000 | -1.030950000 |
| 6                                | -4.712110000 | 1.271917000  | -0.534850000 | 1 | -1.978858000 | -2.539564000 | 0.482531000  |
| 6                                | -5.379888000 | 0.126793000  | -0.921801000 | 1 | -3.411941000 | -4.410795000 | 1.171069000  |
| 6                                | -4.789057000 | -1.103026000 | -0.745126000 | 1 | -4.837111000 | -3.601033000 | 0.545749000  |
| 6                                | -3.517155000 | -1.220925000 | -0.194657000 | 1 | -3.986581000 | -2.937312000 | 1.933262000  |
| 6                                | -2.953225000 | -2.625681000 | 0.031113000  | 1 | -2.371225000 | -4.373695000 | -1.107986000 |
| 6                                | -3.859309000 | -3.439948000 | 0.983950000  | 1 | -3.745937000 | -3.520225000 | -1.792336000 |
| 6                                | -2.789212000 | -3.390853000 | -1.299490000 | 1 | -2.122117000 | -2.865188000 | -1.965475000 |
| 6                                | -2.282131000 | -0.662805000 | 2.917532000  | 1 | -3.294830000 | -0.857742000 | 2.597940000  |
| 6                                | 2.489097000  | -0.294809000 | 2.949909000  | 1 | -2.108976000 | -0.495764000 | 3.975162000  |
| 6                                | 2.853326000  | 0.012969000  | 0.184491000  | 1 | 2.868324000  | -1.319514000 | 2.958122000  |
| 6                                | 3.342476000  | 1.306495000  | -0.049513000 | 1 | 3.308237000  | 0.347457000  | 2.635463000  |
| 6                                | 4.639856000  | 1.448552000  | -0.514919000 | 1 | 2.188673000  | -0.039393000 | 3.966816000  |
| 6                                | 5.429446000  | 0.344476000  | -0.768543000 | 1 | 5.036025000  | 2.427178000  | -0.690165000 |
|                                  |              |              |              | 1 | 6.428958000  | 0.472813000  | -1.134563000 |

|                                     |              |              |              |   |             |              |              |
|-------------------------------------|--------------|--------------|--------------|---|-------------|--------------|--------------|
| 1                                   | 5.541653000  | -1.771599000 | -0.771991000 | 6 | 3.636660000 | -3.414932000 | 3.535356000  |
| 1                                   | 2.157084000  | -2.504134000 | 0.574701000  | 6 | 3.599472000 | -2.867445000 | 4.797692000  |
| 1                                   | 3.644826000  | -4.324498000 | 1.253849000  | 6 | 3.223292000 | -1.551254000 | 4.961408000  |
| 1                                   | 5.045302000  | -3.493290000 | 0.605918000  | 6 | 2.887145000 | -0.761569000 | 3.872385000  |
| 1                                   | 4.219026000  | -2.844907000 | 2.010188000  | 6 | 2.378168000 | 0.659423000  | 4.114411000  |
| 1                                   | 2.628883000  | -4.275645000 | -1.072739000 | 6 | 0.863932000 | 0.603594000  | 4.414818000  |
| 1                                   | 2.305994000  | -2.745816000 | -1.866437000 | 6 | 3.092179000 | 1.388704000  | 5.272731000  |
| 1                                   | 3.961192000  | -3.331298000 | -1.728015000 | 6 | 0.363808000 | -1.391439000 | 1.173698000  |
| 1                                   | 1.451800000  | 2.240949000  | 0.187782000  | 6 | 1.523209000 | 0.422042000  | -2.800268000 |
| 1                                   | 1.935624000  | 4.408247000  | -0.753298000 | 6 | 4.345645000 | 0.900674000  | -2.309319000 |
| 1                                   | 2.562178000  | 3.212882000  | -1.878177000 | 6 | 5.160075000 | -0.117422000 | -2.811787000 |
| 1                                   | 3.654961000  | 4.090750000  | -0.814870000 | 6 | 6.043632000 | 0.197678000  | -3.832380000 |
| 1                                   | 2.205866000  | 4.066540000  | 1.730618000  | 6 | 6.129424000 | 1.483120000  | -4.327621000 |
| 1                                   | 2.556422000  | 2.480343000  | 2.388157000  | 6 | 5.325697000 | 2.474607000  | -3.811944000 |
| 1                                   | 3.842992000  | 3.426803000  | 1.652692000  | 6 | 4.414786000 | 2.208599000  | -2.797575000 |
| 6                                   | -0.984087000 | -0.451916000 | -3.213164000 | 6 | 3.542060000 | 3.355684000  | -2.284176000 |
| 1                                   | 1.749914000  | -0.752863000 | -3.026633000 | 6 | 2.708831000 | 3.975665000  | -3.429400000 |
| 1                                   | 2.121398000  | 0.892740000  | -2.515678000 | 6 | 4.401597000 | 4.445088000  | -1.607110000 |
| 6                                   | 1.369648000  | 0.274856000  | -3.011349000 | 6 | 5.068629000 | -1.549232000 | -2.290465000 |
| 6                                   | -0.484343000 | 1.826603000  | -2.386401000 | 6 | 6.427697000 | -2.280475000 | -2.318723000 |
| 1                                   | -0.434050000 | 2.218748000  | -3.416053000 | 6 | 4.037947000 | -2.352285000 | -3.116842000 |
| 1                                   | 0.119286000  | 2.489662000  | -1.758868000 | 6 | 5.839444000 | 0.734107000  | 1.274102000  |
| 1                                   | -1.523467000 | 1.908564000  | -2.061064000 | 1 | 7.717529000 | 1.670854000  | 0.721519000  |
| 1                                   | -0.881033000 | -1.401679000 | 2.804935000  | 1 | 6.960095000 | 1.473713000  | 2.984859000  |
| 1                                   | 0.062375000  | -2.092007000 | -0.649296000 | 1 | 5.411767000 | 0.744533000  | 3.421742000  |
| 13                                  | 0.014773000  | -0.502568000 | -0.544990000 | 1 | 5.457807000 | 2.368776000  | 2.706067000  |
| <i>AI-inter-TS<sub>A',A</sub>-I</i> |              |              |              | 1 | 0.176700000 | 0.249449000  | -0.677207000 |
| 7                                   | 3.414337000  | 0.604521000  | -1.204672000 | 1 | 3.157285000 | -2.625807000 | 0.284512000  |
| 6                                   | 2.154499000  | 0.449785000  | -1.446227000 | 1 | 2.284157000 | -4.917775000 | -0.019587000 |
| 6                                   | 1.187681000  | 0.403594000  | -0.296879000 | 1 | 2.467904000 | -5.239185000 | 1.695739000  |
| 6                                   | 1.453796000  | -0.569204000 | 0.831222000  | 1 | 1.282400000 | -4.067643000 | 1.142534000  |
| 7                                   | 2.644415000  | -0.467644000 | 1.433860000  | 1 | 4.736206000 | -4.436532000 | -0.221284000 |
| 6                                   | 2.946710000  | -1.323638000 | 2.587448000  | 1 | 4.938910000 | -4.792919000 | 1.479429000  |
| 6                                   | 3.315460000  | -2.664264000 | 2.411526000  | 1 | 5.527867000 | -3.272410000 | 0.833563000  |
| 6                                   | 3.352948000  | -3.360240000 | 1.050830000  | 1 | 3.916236000 | -4.441698000 | 3.417685000  |
| 6                                   | 2.271257000  | -4.462958000 | 0.965510000  | 1 | 3.854252000 | -3.464336000 | 5.650926000  |
| 6                                   | 4.732042000  | -3.999581000 | 0.771899000  | 1 | 3.183000000 | -1.137084000 | 5.946924000  |
|                                     |              |              |              | 1 | 2.522038000 | 1.239033000  | 3.216429000  |

|   |              |              |              |   |              |              |              |
|---|--------------|--------------|--------------|---|--------------|--------------|--------------|
| 1 | 0.475918000  | 1.604435000  | 4.573457000  | 7 | -3.195146000 | 1.287898000  | 0.760440000  |
| 1 | 0.687639000  | 0.020886000  | 5.312146000  | 6 | -2.685268000 | 0.696313000  | 1.838280000  |
| 1 | 0.322505000  | 0.146088000  | 3.599377000  | 6 | -2.235655000 | -0.656850000 | 1.861602000  |
| 1 | 4.167569000  | 1.355536000  | 5.166193000  | 6 | -2.756826000 | -1.767311000 | 1.011403000  |
| 1 | 2.782697000  | 2.428187000  | 5.282070000  | 7 | -3.325797000 | -1.437484000 | -0.218659000 |
| 1 | 2.825808000  | 0.961098000  | 6.231878000  | 6 | -3.926790000 | -2.530602000 | -0.964042000 |
| 1 | 0.508148000  | -2.110536000 | 1.973122000  | 6 | -5.267626000 | -2.887099000 | -0.724163000 |
| 1 | -0.175688000 | -1.795660000 | 0.316070000  | 6 | -6.099867000 | -2.207001000 | 0.361861000  |
| 1 | 0.798312000  | 1.241749000  | -2.858004000 | 6 | -6.168667000 | -3.098927000 | 1.624336000  |
| 1 | 2.240380000  | 0.494214000  | -3.612696000 | 6 | -7.540416000 | -1.881593000 | -0.093757000 |
| 1 | 0.931684000  | -0.494531000 | -2.887400000 | 6 | -5.836713000 | -3.913728000 | -1.461624000 |
| 1 | 6.673638000  | -0.563221000 | -4.241241000 | 6 | -5.113744000 | -4.591800000 | -2.421531000 |
| 1 | 6.823138000  | 1.708805000  | -5.112839000 | 6 | -3.797182000 | -4.256238000 | -2.642269000 |
| 1 | 5.401878000  | 3.469390000  | -4.200004000 | 6 | -3.183616000 | -3.238927000 | -1.921519000 |
| 1 | 2.863428000  | 2.977535000  | -1.536728000 | 6 | -1.694404000 | -2.983406000 | -2.151906000 |
| 1 | 2.037320000  | 4.727038000  | -3.029214000 | 6 | -0.859851000 | -4.161247000 | -1.597189000 |
| 1 | 3.350498000  | 4.455821000  | -4.157918000 | 6 | -1.345221000 | -2.773018000 | -3.641567000 |
| 1 | 2.117223000  | 3.226855000  | -3.941355000 | 6 | -2.598325000 | -3.027920000 | 1.490115000  |
| 1 | 3.763813000  | 5.243668000  | -1.244010000 | 6 | -2.461109000 | 1.492345000  | 3.103448000  |
| 1 | 4.943648000  | 4.035792000  | -0.766948000 | 6 | -3.581688000 | 2.695662000  | 0.839228000  |
| 1 | 5.112409000  | 4.868091000  | -2.306792000 | 6 | -4.929691000 | 3.014237000  | 1.057369000  |
| 1 | 4.731598000  | -1.511914000 | -1.265081000 | 6 | -5.292768000 | 4.349692000  | 1.137305000  |
| 1 | 6.340760000  | -3.222303000 | -1.791551000 | 6 | -4.357685000 | 5.353500000  | 0.984287000  |
| 1 | 7.202269000  | -1.692015000 | -1.843491000 | 6 | -3.040647000 | 5.030032000  | 0.748330000  |
| 1 | 6.733711000  | -2.501819000 | -3.333995000 | 6 | -2.628529000 | 3.705697000  | 0.675931000  |
| 1 | 3.968831000  | -3.369513000 | -2.746734000 | 6 | -1.153760000 | 3.412084000  | 0.411842000  |
| 1 | 3.053608000  | -1.906716000 | -3.064968000 | 6 | -0.228380000 | 4.135160000  | 1.417974000  |
| 1 | 4.342260000  | -2.384825000 | -4.156689000 | 6 | -0.771108000 | 3.815778000  | -1.028640000 |
| 6 | 5.908329000  | 1.369178000  | 2.674508000  | 6 | -5.990125000 | 1.925866000  | 1.216629000  |
| 1 | 6.309320000  | 2.625104000  | 0.255497000  | 6 | -7.350740000 | 2.327469000  | 0.607134000  |
| 1 | 6.749849000  | 1.189865000  | -0.679956000 | 6 | -6.188459000 | 1.560840000  | 2.705374000  |
| 6 | 6.689275000  | 1.600926000  | 0.331658000  | 6 | -4.314654000 | 0.886419000  | -2.471702000 |
| 6 | 6.477542000  | -0.653422000 | 1.365726000  | 1 | -4.831446000 | 2.705223000  | -3.542360000 |
| 1 | 7.521249000  | -0.564175000 | 1.708356000  | 1 | -4.215331000 | 0.681784000  | -4.637656000 |
| 1 | 6.501739000  | -1.161708000 | 0.398174000  | 1 | -3.739287000 | -0.782072000 | -3.767879000 |
| 1 | 5.955006000  | -1.297989000 | 2.077646000  | 1 | -2.626325000 | 0.599599000  | -3.854636000 |
| 1 | 1.213579000  | 1.412854000  | 0.146637000  | 1 | -2.081021000 | -1.002589000 | 2.881520000  |
| 1 | 3.249673000  | 2.276408000  | 0.945727000  | 1 | -5.601195000 | -1.286795000 | 0.619738000  |

|   |              |              |              |    |                                  |              |              |
|---|--------------|--------------|--------------|----|----------------------------------|--------------|--------------|
| 1 | -6.747396000 | -2.604636000 | 2.399785000  | 6  | -3.679790000                     | 0.310303000  | -3.748119000 |
| 1 | -6.652838000 | -4.040594000 | 1.387232000  | 1  | -3.294112000                     | 2.821093000  | -2.682929000 |
| 1 | -5.178047000 | -3.298178000 | 2.003702000  | 1  | -4.810880000                     | 2.920324000  | -1.785115000 |
| 1 | -8.032685000 | -1.284653000 | 0.668030000  | 6  | -4.309296000                     | 2.415253000  | -2.614710000 |
| 1 | -8.123708000 | -2.785895000 | -0.222556000 | 6  | -5.767965000                     | 0.408367000  | -2.438807000 |
| 1 | -7.552016000 | -1.329641000 | -1.022761000 | 1  | -6.308479000                     | 0.774379000  | -3.328513000 |
| 1 | -6.855950000 | -4.189923000 | -1.283150000 | 1  | -6.309085000                     | 0.773550000  | -1.562228000 |
| 1 | -5.572236000 | -5.380951000 | -2.984891000 | 1  | -5.831917000                     | -0.682579000 | -2.443997000 |
| 1 | -3.233563000 | -4.798353000 | -3.374954000 | 1  | -0.809631000                     | -0.705341000 | 1.526731000  |
| 1 | -1.428477000 | -2.089741000 | -1.611510000 | 1  | -1.596279000                     | 0.549373000  | -1.387566000 |
| 1 | 0.200668000  | -3.970542000 | -1.738015000 | 13 | 3.918476000                      | 0.835464000  | 0.744129000  |
| 1 | -1.109559000 | -5.078815000 | -2.118024000 | 13 | -3.136570000                     | 0.299450000  | -0.946742000 |
| 1 | -1.048327000 | -4.297196000 | -0.542043000 |    |                                  |              |              |
| 1 | -0.286302000 | -2.549777000 | -3.742145000 |    | <i>Al-inter-IM<sub>4,4</sub></i> |              |              |
| 1 | -1.543872000 | -3.666998000 | -4.220439000 | 7  | 3.220336000                      | 0.565084000  | -1.284921000 |
| 1 | -1.908643000 | -1.955979000 | -4.067572000 | 6  | 1.942046000                      | 0.380364000  | -1.332660000 |
| 1 | -2.924922000 | -3.897409000 | 0.938230000  | 6  | 1.145926000                      | 0.370256000  | -0.054026000 |
| 1 | -2.171981000 | -3.180556000 | 2.474848000  | 6  | 1.654791000                      | -0.430969000 | 1.118383000  |
| 1 | -1.516841000 | 2.035029000  | 3.029346000  | 7  | 2.895061000                      | -0.316964000 | 1.480823000  |
| 1 | -3.241673000 | 2.233256000  | 3.261860000  | 6  | 3.347340000                      | -0.936812000 | 2.746987000  |
| 1 | -2.401841000 | 0.831094000  | 3.967827000  | 6  | 3.912714000                      | -2.216592000 | 2.734571000  |
| 1 | -6.315549000 | 4.610488000  | 1.312136000  | 6  | 4.012073000                      | -3.062829000 | 1.465499000  |
| 1 | -4.658092000 | 6.381025000  | 1.043142000  | 6  | 2.826851000                      | -4.054862000 | 1.392589000  |
| 1 | -2.321249000 | 5.813331000  | 0.619832000  | 6  | 5.330107000                      | -3.864268000 | 1.375452000  |
| 1 | -1.003395000 | 2.348939000  | 0.503655000  | 6  | 4.345849000                      | -2.745906000 | 3.941204000  |
| 1 | 0.797196000  | 3.805543000  | 1.284248000  | 6  | 4.227314000                      | -2.033997000 | 5.116744000  |
| 1 | -0.253697000 | 5.207515000  | 1.266309000  | 6  | 3.660702000                      | -0.778796000 | 5.108600000  |
| 1 | -0.520351000 | 3.934683000  | 2.441207000  | 6  | 3.204557000                      | -0.202950000 | 3.930047000  |
| 1 | 0.283737000  | 3.624770000  | -1.203237000 | 6  | 2.519288000                      | 1.165112000  | 4.000732000  |
| 1 | -1.347900000 | 3.248453000  | -1.744112000 | 6  | 1.165374000                      | 1.046803000  | 4.740423000  |
| 1 | -0.953005000 | 4.871552000  | -1.191770000 | 6  | 3.396632000                      | 2.223828000  | 4.704020000  |
| 1 | -5.637979000 | 1.048376000  | 0.699555000  | 6  | 0.603858000                      | -1.203854000 | 1.815787000  |
| 1 | -8.001422000 | 1.460807000  | 0.581372000  | 6  | 1.128316000                      | 0.276437000  | -2.576525000 |
| 1 | -7.235955000 | 2.698173000  | -0.403366000 | 6  | 3.990083000                      | 0.765590000  | -2.529427000 |
| 1 | -7.841662000 | 3.088417000  | 1.202765000  | 6  | 4.729786000                      | -0.300946000 | -3.047179000 |
| 1 | -6.966681000 | 0.811265000  | 2.805074000  | 6  | 5.479969000                      | -0.077584000 | -4.190673000 |
| 1 | -5.282523000 | 1.158811000  | 3.137848000  | 6  | 5.506332000                      | 1.165397000  | -4.791325000 |
| 1 | -6.483097000 | 2.439245000  | 3.269334000  | 6  | 4.772789000                      | 2.203388000  | -4.262362000 |

|   |             |              |              |   |              |              |              |
|---|-------------|--------------|--------------|---|--------------|--------------|--------------|
| 6 | 3.994025000 | 2.029034000  | -3.125070000 | 1 | 2.592955000  | 2.902636000  | -1.758688000 |
| 6 | 3.181137000 | 3.217225000  | -2.606220000 | 1 | 1.589891000  | 4.525839000  | -3.278435000 |
| 6 | 2.216146000 | 3.744383000  | -3.693046000 | 1 | 2.765580000  | 4.163125000  | -4.527104000 |
| 6 | 4.105139000 | 4.356270000  | -2.123441000 | 1 | 1.574346000  | 2.958047000  | -4.069949000 |
| 6 | 4.691165000 | -1.687770000 | -2.410899000 | 1 | 3.507375000  | 5.184735000  | -1.760061000 |
| 6 | 6.034090000 | -2.439444000 | -2.527170000 | 1 | 4.742089000  | 4.019721000  | -1.317630000 |
| 6 | 3.571167000 | -2.537961000 | -3.053742000 | 1 | 4.730604000  | 4.715972000  | -2.931467000 |
| 6 | 6.005845000 | 0.945248000  | 0.746498000  | 1 | 4.468632000  | -1.567678000 | -1.361469000 |
| 1 | 7.787527000 | 1.771922000  | -0.170071000 | 1 | 5.998007000  | -3.335712000 | -1.919090000 |
| 1 | 7.361364000 | 1.835385000  | 2.193994000  | 1 | 6.861167000  | -1.828606000 | -2.188808000 |
| 1 | 5.872365000 | 1.224335000  | 2.920922000  | 1 | 6.224813000  | -2.746657000 | -3.548088000 |
| 1 | 5.855925000 | 2.747470000  | 2.008556000  | 1 | 3.533642000  | -3.520797000 | -2.596008000 |
| 1 | 0.108726000 | 0.097720000  | -0.274117000 | 1 | 2.601187000  | -2.074176000 | -2.937575000 |
| 1 | 3.963112000 | -2.401684000 | 0.613533000  | 1 | 3.762601000  | -2.660295000 | -4.113408000 |
| 1 | 2.892196000 | -4.649879000 | 0.487892000  | 6 | 6.275867000  | 1.735086000  | 2.040820000  |
| 1 | 2.855648000 | -4.725131000 | 2.243741000  | 1 | 6.334310000  | 2.695022000  | -0.547795000 |
| 1 | 1.873526000 | -3.548710000 | 1.394700000  | 1 | 6.630814000  | 1.150899000  | -1.356378000 |
| 1 | 5.400605000 | -4.325373000 | 0.396595000  | 6 | 6.715139000  | 1.679186000  | -0.403148000 |
| 1 | 5.352743000 | -4.660549000 | 2.108969000  | 6 | 6.640663000  | -0.437604000 | 0.906926000  |
| 1 | 6.195866000 | -3.234311000 | 1.520933000  | 1 | 7.728454000  | -0.335535000 | 1.047856000  |
| 1 | 4.775736000 | -3.725023000 | 3.963288000  | 1 | 6.488106000  | -1.073143000 | 0.030623000  |
| 1 | 4.569151000 | -2.461864000 | 6.037965000  | 1 | 6.248522000  | -0.960681000 | 1.782146000  |
| 1 | 3.560009000 | -0.240719000 | 6.028255000  | 1 | 1.115722000  | 1.420693000  | 0.287352000  |
| 1 | 2.331145000 | 1.519178000  | 2.999607000  | 1 | 3.276865000  | 2.366226000  | 0.785830000  |
| 1 | 0.661044000 | 2.006904000  | 4.741990000  | 7 | -3.427265000 | 1.262606000  | 0.737146000  |
| 1 | 1.322878000 | 0.744876000  | 5.769061000  | 6 | -2.988162000 | 0.747303000  | 1.940182000  |
| 1 | 0.513972000 | 0.322117000  | 4.271071000  | 6 | -2.631826000 | -0.559821000 | 2.139258000  |
| 1 | 4.353078000 | 2.332355000  | 4.212906000  | 6 | -2.774611000 | -1.742610000 | 1.281542000  |
| 1 | 2.890863000 | 3.182688000  | 4.680240000  | 7 | -3.256248000 | -1.560907000 | -0.018857000 |
| 1 | 3.568205000 | 1.964314000  | 5.741368000  | 6 | -3.731951000 | -2.751011000 | -0.695788000 |
| 1 | 0.951277000 | -1.719049000 | 2.706061000  | 6 | -5.054635000 | -3.184943000 | -0.475628000 |
| 1 | 0.135448000 | -1.913215000 | 1.121339000  | 6 | -5.978827000 | -2.465086000 | 0.504792000  |
| 1 | 0.394733000 | 1.091272000  | -2.572599000 | 6 | -6.063812000 | -3.251224000 | 1.834397000  |
| 1 | 1.728194000 | 0.304384000  | -3.481198000 | 6 | -7.406460000 | -2.261801000 | -0.050281000 |
| 1 | 0.524656000 | -0.633938000 | -2.531558000 | 6 | -5.516115000 | -4.316788000 | -1.127691000 |
| 1 | 6.050575000 | -0.876334000 | -4.614705000 | 6 | -4.703650000 | -5.030186000 | -1.985484000 |
| 1 | 6.097254000 | 1.321020000  | -5.671727000 | 6 | -3.407656000 | -4.615821000 | -2.191527000 |
| 1 | 4.798810000 | 3.162265000  | -4.737348000 | 6 | -2.902498000 | -3.486751000 | -1.556819000 |

|   |              |              |              |    |              |              |              |
|---|--------------|--------------|--------------|----|--------------|--------------|--------------|
| 6 | -1.432281000 | -3.129319000 | -1.775941000 | 1  | -1.133628000 | -4.083085000 | -3.717260000 |
| 6 | -0.517157000 | -4.140323000 | -1.045427000 | 1  | -1.664277000 | -2.413577000 | -3.827971000 |
| 6 | -1.043381000 | -3.100024000 | -3.271682000 | 1  | -2.606501000 | -3.881811000 | 1.300559000  |
| 6 | -2.465823000 | -2.952802000 | 1.833084000  | 1  | -2.163309000 | -3.003397000 | 2.873144000  |
| 6 | -2.868451000 | 1.679536000  | 3.128253000  | 1  | -2.116555000 | 2.449645000  | 2.954694000  |
| 6 | -3.856888000 | 2.646145000  | 0.701956000  | 1  | -3.805957000 | 2.201382000  | 3.324365000  |
| 6 | -5.223849000 | 2.949159000  | 0.817829000  | 1  | -2.589815000 | 1.116914000  | 4.021186000  |
| 6 | -5.627768000 | 4.275767000  | 0.799089000  | 1  | -6.667189000 | 4.513571000  | 0.897620000  |
| 6 | -4.714206000 | 5.298475000  | 0.647033000  | 1  | -5.044474000 | 6.318715000  | 0.629911000  |
| 6 | -3.376767000 | 4.999455000  | 0.508236000  | 1  | -2.671851000 | 5.796296000  | 0.376809000  |
| 6 | -2.929447000 | 3.685755000  | 0.536509000  | 1  | -1.272261000 | 2.366935000  | 0.548126000  |
| 6 | -1.435547000 | 3.416899000  | 0.367297000  | 1  | 0.472067000  | 3.945814000  | 1.266560000  |
| 6 | -0.571069000 | 4.239728000  | 1.350552000  | 1  | -0.631180000 | 5.298563000  | 1.129674000  |
| 6 | -0.993658000 | 3.722834000  | -1.080315000 | 1  | -0.886083000 | 4.092192000  | 2.375554000  |
| 6 | -6.269288000 | 1.845653000  | 0.964199000  | 1  | 0.073438000  | 3.547473000  | -1.195066000 |
| 6 | -7.541275000 | 2.124491000  | 0.133263000  | 1  | -1.525016000 | 3.090005000  | -1.775086000 |
| 6 | -6.662791000 | 1.643644000  | 2.444748000  | 1  | -1.192352000 | 4.758623000  | -1.330250000 |
| 6 | -4.204347000 | 0.523998000  | -2.493863000 | 1  | -5.822096000 | 0.932917000  | 0.607610000  |
| 1 | -4.794006000 | 2.199774000  | -3.747441000 | 1  | -8.170147000 | 1.240644000  | 0.127966000  |
| 1 | -3.925759000 | 0.146329000  | -4.623130000 | 1  | -7.294590000 | 2.374276000  | -0.890652000 |
| 1 | -3.421359000 | -1.197351000 | -3.589416000 | 1  | -8.120328000 | 2.937116000  | 0.557122000  |
| 1 | -2.400821000 | 0.250090000  | -3.721207000 | 1  | -7.428519000 | 0.878510000  | 2.527168000  |
| 1 | -2.304189000 | -0.802121000 | 3.145471000  | 1  | -5.813240000 | 1.330053000  | 3.035509000  |
| 1 | -5.544422000 | -1.499469000 | 0.706315000  | 1  | -7.054704000 | 2.566722000  | 2.858893000  |
| 1 | -6.695789000 | -2.721601000 | 2.541741000  | 6  | -3.438405000 | -0.106196000 | -3.665775000 |
| 1 | -6.495033000 | -4.231926000 | 1.660111000  | 1  | -3.318159000 | 2.505931000  | -2.828353000 |
| 1 | -5.081419000 | -3.370000000 | 2.266369000  | 1  | -4.882435000 | 2.564605000  | -2.015651000 |
| 1 | -7.972851000 | -1.636705000 | 0.633515000  | 6  | -4.303312000 | 2.029999000  | -2.773171000 |
| 1 | -7.931792000 | -3.206006000 | -0.138468000 | 6  | -5.619111000 | -0.060878000 | -2.511739000 |
| 1 | -7.392693000 | -1.783737000 | -1.019682000 | 1  | -6.124592000 | 0.188060000  | -3.461305000 |
| 1 | -6.520781000 | -4.649037000 | -0.961133000 | 1  | -6.241719000 | 0.332299000  | -1.703552000 |
| 1 | -5.077617000 | -5.904193000 | -2.482354000 | 1  | -5.605589000 | -1.150625000 | -2.425151000 |
| 1 | -2.776005000 | -5.181915000 | -2.846530000 | 1  | -0.223539000 | -0.519380000 | 2.062410000  |
| 1 | -1.273043000 | -2.148133000 | -1.356254000 | 1  | -1.565516000 | 0.420024000  | -1.178325000 |
| 1 | 0.529077000  | -3.881134000 | -1.194679000 | 13 | 4.031592000  | 0.992579000  | 0.494569000  |
| 1 | -0.673020000 | -5.138964000 | -1.438057000 | 13 | -3.142189000 | 0.164281000  | -0.814819000 |
| 1 | -0.727971000 | -4.148578000 | 0.013994000  |    |              |              |              |
| 1 | -0.006449000 | -2.793033000 | -3.379752000 |    |              |              |              |

Al-inter-TS<sub>4</sub>-I

|   |              |              |              |   |              |              |              |
|---|--------------|--------------|--------------|---|--------------|--------------|--------------|
| 7 | -2.649850000 | -1.498564000 | 0.464150000  | 1 | -4.664369000 | -0.684261000 | -4.400620000 |
| 6 | -1.651433000 | -1.239432000 | -0.333906000 | 1 | -5.177261000 | 0.987162000  | -4.595065000 |
| 6 | -1.348514000 | 0.144744000  | -0.765727000 | 1 | -3.707838000 | 0.617255000  | -3.714536000 |
| 6 | -2.451769000 | 1.048731000  | -1.165598000 | 1 | -6.823184000 | -1.420878000 | -3.297560000 |
| 7 | -3.617450000 | 1.020973000  | -0.588432000 | 1 | -7.398577000 | 0.155524000  | -3.779406000 |
| 6 | -4.675528000 | 1.968808000  | -0.993132000 | 1 | -7.605574000 | -0.381348000 | -2.116747000 |
| 6 | -5.630705000 | 1.550625000  | -1.929976000 | 1 | -7.397324000 | 2.132721000  | -2.964405000 |
| 6 | -5.552084000 | 0.185727000  | -2.614966000 | 1 | -7.562730000 | 4.317883000  | -1.897383000 |
| 6 | -4.715673000 | 0.283364000  | -3.912270000 | 1 | -5.875885000 | 5.025980000  | -0.285326000 |
| 6 | -6.938749000 | -0.395155000 | -2.967891000 | 1 | -2.860021000 | 3.069034000  | 0.632139000  |
| 6 | -6.657125000 | 2.423435000  | -2.249916000 | 1 | -2.724952000 | 4.985835000  | -1.026858000 |
| 6 | -6.751749000 | 3.662865000  | -1.648367000 | 1 | -2.261224000 | 5.434716000  | 0.605572000  |
| 6 | -5.801194000 | 4.058600000  | -0.736864000 | 1 | -3.837926000 | 5.885437000  | -0.010825000 |
| 6 | -4.733566000 | 3.232788000  | -0.400619000 | 1 | -4.551126000 | 3.110956000  | 2.416504000  |
| 6 | -3.663710000 | 3.784321000  | 0.545557000  | 1 | -3.446099000 | 4.457000000  | 2.590151000  |
| 6 | -3.086440000 | 5.105643000  | -0.013984000 | 1 | -5.054329000 | 4.725765000  | 1.934359000  |
| 6 | -4.221774000 | 4.032552000  | 1.962589000  | 1 | -2.854436000 | 2.727271000  | -2.476819000 |
| 6 | -2.050469000 | 2.051432000  | -2.201425000 | 1 | -1.664258000 | 1.540996000  | -3.086804000 |
| 6 | -0.764513000 | -2.311312000 | -0.895126000 | 1 | 0.215460000  | -1.902589000 | -1.137581000 |
| 6 | -2.857804000 | -2.860092000 | 0.996943000  | 1 | -0.659812000 | -3.159005000 | -0.219583000 |
| 6 | -3.549510000 | -3.819933000 | 0.251939000  | 1 | -1.227400000 | -2.669841000 | -1.820677000 |
| 6 | -3.803939000 | -5.048892000 | 0.844101000  | 1 | -4.332616000 | -5.798835000 | 0.292365000  |
| 6 | -3.392043000 | -5.320929000 | 2.130632000  | 1 | -3.607257000 | -6.273013000 | 2.573142000  |
| 6 | -2.692950000 | -4.370531000 | 2.842408000  | 1 | -2.362299000 | -4.594555000 | 3.835419000  |
| 6 | -2.403203000 | -3.128838000 | 2.294764000  | 1 | -1.324997000 | -1.292531000 | 2.507990000  |
| 6 | -1.581818000 | -2.137904000 | 3.124895000  | 1 | 0.363595000  | -2.024682000 | 4.066603000  |
| 6 | -0.267302000 | -2.783846000 | 3.619072000  | 1 | -0.462458000 | -3.543391000 | 4.366393000  |
| 6 | -2.379149000 | -1.610322000 | 4.337345000  | 1 | 0.277922000  | -3.239718000 | 2.805292000  |
| 6 | -4.030624000 | -3.594223000 | -1.181064000 | 1 | -1.755113000 | -0.944002000 | 4.922195000  |
| 6 | -5.568571000 | -3.695158000 | -1.277583000 | 1 | -3.250227000 | -1.056056000 | 4.021335000  |
| 6 | -3.392488000 | -4.618892000 | -2.149185000 | 1 | -2.698061000 | -2.428279000 | 4.972870000  |
| 6 | -5.677144000 | -0.447522000 | 1.807838000  | 1 | -3.743066000 | -2.600877000 | -1.493212000 |
| 1 | -6.802709000 | -1.958435000 | 2.871780000  | 1 | -5.887520000 | -3.525983000 | -2.300103000 |
| 1 | -6.877871000 | 0.337365000  | 3.439676000  | 1 | -6.047865000 | -2.964257000 | -0.643274000 |
| 1 | -5.990842000 | 1.589132000  | 2.570081000  | 1 | -5.907368000 | -4.679554000 | -0.979677000 |
| 1 | -5.139630000 | 0.539676000  | 3.712310000  | 1 | -3.660945000 | -4.378209000 | -3.172399000 |
| 1 | -0.597784000 | 0.117636000  | -1.559149000 | 1 | -2.313600000 | -4.630295000 | -2.068995000 |
| 1 | -5.063369000 | -0.500513000 | -1.938429000 | 1 | -3.753764000 | -5.617459000 | -1.936627000 |



|   |              |              |              |   |              |              |              |
|---|--------------|--------------|--------------|---|--------------|--------------|--------------|
| 6 | -5.921165000 | 0.564214000  | 2.944624000  | 6 | 3.811783000  | -1.785756000 | -4.332189000 |
| 1 | -5.075261000 | -2.044126000 | 3.210360000  | 6 | 5.979063000  | -1.817889000 | 1.259701000  |
| 1 | -5.695103000 | -2.649205000 | 1.680976000  | 6 | 7.478339000  | -1.491128000 | 1.445304000  |
| 6 | -5.803487000 | -1.853521000 | 2.419702000  | 6 | 5.496476000  | -2.657387000 | 2.464643000  |
| 6 | -6.828295000 | -0.283620000 | 0.807771000  | 6 | 5.668022000  | 1.454043000  | -1.394980000 |
| 1 | -7.787789000 | -0.459224000 | 1.320082000  | 1 | 7.492653000  | 0.880098000  | -2.425730000 |
| 1 | -6.767702000 | -1.006810000 | -0.008917000 | 1 | 6.601299000  | 3.055841000  | -2.529954000 |
| 1 | -6.869576000 | 0.716358000  | 0.371047000  | 1 | 5.099686000  | 3.541337000  | -1.735623000 |
| 1 | -0.715746000 | 0.725085000  | 0.084982000  | 1 | 5.047205000  | 2.537306000  | -3.202532000 |
| 1 | -2.872193000 | 0.790970000  | 2.072074000  | 1 | 0.786803000  | -1.096216000 | 1.197646000  |
| 1 | -1.215121000 | 2.622055000  | -1.784399000 | 1 | 3.951993000  | 0.949921000  | 2.264843000  |
| 7 | 3.713079000  | -1.119407000 | -0.452843000 | 1 | 3.172256000  | 0.858414000  | 4.628123000  |
| 6 | 2.589368000  | -1.498128000 | 0.218489000  | 1 | 2.991028000  | 2.609731000  | 4.632469000  |
| 6 | 1.633496000  | -0.629357000 | 0.705691000  | 1 | 1.960777000  | 1.621610000  | 3.602101000  |
| 6 | 1.624232000  | 0.819510000  | 0.773737000  | 1 | 5.635927000  | 0.994233000  | 4.005759000  |
| 7 | 2.705148000  | 1.509614000  | 0.288058000  | 1 | 5.469263000  | 2.720570000  | 4.232607000  |
| 6 | 2.962459000  | 2.857866000  | 0.762524000  | 1 | 6.169350000  | 2.097252000  | 2.744692000  |
| 6 | 3.662095000  | 3.028534000  | 1.974090000  | 1 | 4.548602000  | 4.443123000  | 3.293663000  |
| 6 | 4.001699000  | 1.839861000  | 2.871803000  | 1 | 4.006239000  | 6.388927000  | 1.918762000  |
| 6 | 2.956972000  | 1.723442000  | 4.007223000  | 1 | 2.742445000  | 6.102227000  | -0.149987000 |
| 6 | 5.411797000  | 1.926744000  | 3.496698000  | 1 | 1.474063000  | 2.840222000  | -1.388765000 |
| 6 | 4.015974000  | 4.305537000  | 2.374887000  | 1 | -0.271299000 | 4.604050000  | -1.806520000 |
| 6 | 3.706081000  | 5.408724000  | 1.603381000  | 1 | 0.580003000  | 5.687498000  | -0.730656000 |
| 6 | 2.999254000  | 5.241945000  | 0.435541000  | 1 | -0.133410000 | 4.218614000  | -0.088722000 |
| 6 | 2.599274000  | 3.979614000  | 0.008442000  | 1 | 1.627020000  | 4.410685000  | -3.321209000 |
| 6 | 1.696673000  | 3.883289000  | -1.221302000 | 1 | 2.627621000  | 5.490473000  | -2.364990000 |
| 6 | 0.381482000  | 4.643630000  | -0.940095000 | 1 | 3.209833000  | 3.886866000  | -2.785154000 |
| 6 | 2.339102000  | 4.454503000  | -2.502141000 | 1 | 0.433531000  | 2.488126000  | 1.448814000  |
| 6 | 0.478099000  | 1.415068000  | 1.312488000  | 1 | -0.154021000 | 0.823321000  | 1.968887000  |
| 6 | 2.321526000  | -2.977165000 | 0.404427000  | 1 | 2.086825000  | -3.448155000 | -0.552214000 |
| 6 | 4.622392000  | -2.171212000 | -0.882647000 | 1 | 3.188917000  | -3.502230000 | 0.800208000  |
| 6 | 5.705488000  | -2.529594000 | -0.064549000 | 1 | 1.481729000  | -3.128589000 | 1.080069000  |
| 6 | 6.550620000  | -3.549721000 | -0.474694000 | 1 | 7.373979000  | -3.836327000 | 0.147304000  |
| 6 | 6.357358000  | -4.195684000 | -1.678410000 | 1 | 7.025595000  | -4.976790000 | -1.984217000 |
| 6 | 5.307138000  | -3.824844000 | -2.488839000 | 1 | 5.169154000  | -4.320369000 | -3.428984000 |
| 6 | 4.424990000  | -2.822249000 | -2.108565000 | 1 | 2.640138000  | -1.749972000 | -2.551337000 |
| 6 | 3.276345000  | -2.462173000 | -3.051366000 | 1 | 1.578747000  | -3.392301000 | -4.031675000 |
| 6 | 2.434533000  | -3.700565000 | -3.438314000 | 1 | 3.014183000  | -4.396095000 | -4.033122000 |



|                                  |              |              |              |   |              |              |              |
|----------------------------------|--------------|--------------|--------------|---|--------------|--------------|--------------|
| 1                                | 3.852697000  | -2.526745000 | -2.421884000 | 1 | -0.004680000 | -2.577980000 | 0.081737000  |
| 1                                | 2.552699000  | -4.599467000 | 0.385886000  | 7 | 1.579647000  | -0.578337000 | 0.705443000  |
| 1                                | 3.947356000  | -3.833307000 | 1.124296000  | 6 | 1.290386000  | -0.377915000 | 2.135472000  |
| 1                                | 2.327893000  | -3.301747000 | 1.545145000  | 6 | 0.068649000  | -0.096284000 | 2.609485000  |
| 1                                | 3.328417000  | -0.065888000 | -2.624522000 | 6 | -1.250242000 | 0.133969000  | 1.986860000  |
| 1                                | 2.106236000  | -0.223426000 | -4.011054000 | 7 | -1.400385000 | -0.075197000 | 0.616505000  |
| 1                                | -2.224064000 | -0.482002000 | -4.031104000 | 6 | -2.769078000 | -0.010976000 | 0.111231000  |
| 1                                | -3.019987000 | -1.489913000 | -2.813727000 | 6 | -3.235614000 | 1.152502000  | -0.517439000 |
| 1                                | -3.256801000 | 0.252420000  | -2.792231000 | 6 | -2.366270000 | 2.398538000  | -0.637802000 |
| 1                                | -4.251994000 | 3.068818000  | 0.608073000  | 6 | -2.737761000 | 3.413919000  | 0.467767000  |
| 1                                | -6.061126000 | 1.563955000  | 1.261298000  | 6 | -2.480522000 | 3.074751000  | -2.021731000 |
| 1                                | -5.822431000 | -0.843145000 | 0.948955000  | 6 | -4.531821000 | 1.179756000  | -1.011700000 |
| 1                                | -2.915865000 | -2.483178000 | -0.664084000 | 6 | -5.361205000 | 0.084111000  | -0.897250000 |
| 1                                | -4.887484000 | -3.804485000 | -1.123418000 | 6 | -4.902898000 | -1.054286000 | -0.271604000 |
| 1                                | -5.929875000 | -2.656532000 | -0.308383000 | 6 | -3.617116000 | -1.121702000 | 0.246958000  |
| 1                                | -5.136223000 | -2.202035000 | -1.807293000 | 6 | -3.190681000 | -2.404147000 | 0.961297000  |
| 1                                | -3.666788000 | -4.077757000 | 1.081036000  | 6 | -4.102738000 | -2.695104000 | 2.173635000  |
| 1                                | -2.796534000 | -2.729278000 | 1.791615000  | 6 | -3.190274000 | -3.606839000 | -0.007149000 |
| 1                                | -4.550008000 | -2.786379000 | 1.885142000  | 6 | -2.232348000 | 0.527147000  | 2.834506000  |
| 1                                | -0.933752000 | 1.940838000  | -0.616805000 | 6 | 2.447896000  | -0.617079000 | 3.065631000  |
| 1                                | -0.698347000 | 4.145426000  | 0.357669000  | 6 | 2.779257000  | 0.168251000  | 0.213762000  |
| 1                                | -1.365380000 | 3.094227000  | 1.598186000  | 6 | 2.770777000  | 1.566256000  | 0.216747000  |
| 1                                | -2.401474000 | 4.233211000  | 0.753606000  | 6 | 3.932251000  | 2.229410000  | -0.152927000 |
| 1                                | -1.430774000 | 3.880801000  | -2.066726000 | 6 | 5.060386000  | 1.541022000  | -0.538451000 |
| 1                                | -2.354454000 | 2.475185000  | -2.567879000 | 6 | 5.037855000  | 0.165276000  | -0.577856000 |
| 1                                | -3.137176000 | 3.757735000  | -1.653024000 | 6 | 3.907203000  | -0.551583000 | -0.210962000 |
| 6                                | 0.688957000  | -1.439938000 | 3.107361000  | 6 | 3.996471000  | -2.084461000 | -0.284500000 |
| 1                                | -2.014297000 | -0.934679000 | 2.798981000  | 6 | 4.841145000  | -2.640458000 | 0.884483000  |
| 1                                | -1.903829000 | 0.815909000  | 2.639483000  | 6 | 4.610848000  | -2.564271000 | -1.621572000 |
| 6                                | -1.384415000 | -0.068505000 | 3.016483000  | 6 | 1.556630000  | 2.404233000  | 0.617035000  |
| 6                                | 0.849595000  | 1.019531000  | 2.862705000  | 6 | 1.264402000  | 3.509858000  | -0.423045000 |
| 1                                | 0.839249000  | 1.114599000  | 3.960054000  | 6 | 1.777648000  | 3.053859000  | 2.001744000  |
| 1                                | 0.441166000  | 1.948364000  | 2.454591000  | 6 | -0.015161000 | -0.828337000 | -2.363133000 |
| 1                                | 1.892741000  | 0.941637000  | 2.548400000  | 1 | 0.532587000  | 0.545802000  | -3.956839000 |
| 13                               | 0.047801000  | -0.511288000 | 0.481619000  | 1 | 0.999731000  | -1.905646000 | -3.962137000 |
|                                  |              |              |              | 1 | 0.626396000  | -2.921666000 | -2.556773000 |
|                                  |              |              |              | 1 | 1.961841000  | -1.761133000 | -2.489011000 |
|                                  |              |              |              | 1 | 0.029301000  | -0.012389000 | 3.691979000  |
| <i>Al-intra-IM<sub>1,2</sub></i> |              |              |              |   |              |              |              |
| 1                                | 1.835577000  | -1.564120000 | 0.658477000  |   |              |              |              |





|   |              |              |              |   |              |              |              |
|---|--------------|--------------|--------------|---|--------------|--------------|--------------|
| 6 | 4.819978000  | 1.875137000  | -1.175794000 | 1 | 1.925654000  | -3.927292000 | -3.246586000 |
| 6 | 5.496903000  | 1.483648000  | -2.338019000 | 6 | 4.237220000  | -4.258413000 | -1.836987000 |
| 6 | 6.619059000  | 2.198843000  | -2.728682000 | 1 | 4.416639000  | -4.037198000 | -2.883636000 |
| 6 | 7.054030000  | 3.287794000  | -2.002255000 | 1 | 5.098155000  | -3.940337000 | -1.265932000 |
| 6 | 6.354548000  | 3.691511000  | -0.884875000 | 1 | 4.144122000  | -5.332714000 | -1.739217000 |
| 6 | 5.227583000  | 3.003860000  | -0.455756000 | 6 | 0.340115000  | -1.670790000 | 3.535811000  |
| 6 | 5.789421000  | -0.911649000 | 1.236882000  | 1 | -0.026651000 | -2.609599000 | 3.935723000  |
| 1 | 7.871807000  | -0.364096000 | 1.361110000  | 1 | 0.092737000  | -0.881416000 | 4.237125000  |
| 1 | 5.324325000  | 0.332014000  | 3.008005000  | 1 | -0.168782000 | -1.469317000 | 2.607434000  |
| 1 | 6.511520000  | -0.946013000 | 3.280483000  | 6 | 2.533554000  | -1.922000000 | 4.725357000  |
| 1 | 4.800713000  | -1.354164000 | 3.140009000  | 1 | 3.591079000  | -2.135694000 | 4.651401000  |
| 1 | 0.413353000  | 0.752159000  | -1.281142000 | 1 | 2.406158000  | -1.011330000 | 5.300369000  |
| 1 | 2.881861000  | -5.841770000 | -0.002974000 | 1 | 2.063495000  | -2.724255000 | 5.280919000  |
| 1 | 2.467526000  | -6.243310000 | 2.367931000  | 6 | 5.030171000  | 0.303509000  | -3.190801000 |
| 1 | 2.039378000  | -4.370780000 | 3.869585000  | 1 | 4.068070000  | -0.022659000 | -2.826781000 |
| 1 | 0.076040000  | -2.497984000 | 0.251400000  | 6 | 6.013825000  | -0.881784000 | -3.081014000 |
| 1 | -0.515617000 | -1.321688000 | -1.032140000 | 1 | 7.004064000  | -0.588759000 | -3.408677000 |
| 1 | 2.521260000  | 3.393732000  | -1.507841000 | 1 | 6.089795000  | -1.230806000 | -2.058053000 |
| 1 | 2.748880000  | 2.406957000  | -2.941890000 | 1 | 5.679958000  | -1.709391000 | -3.697128000 |
| 1 | 1.125237000  | 2.576616000  | -2.228144000 | 6 | 4.852695000  | 0.707656000  | -4.671193000 |
| 1 | 7.155631000  | 1.904970000  | -3.607921000 | 1 | 4.430373000  | -0.120732000 | -5.229673000 |
| 1 | 7.926448000  | 3.827256000  | -2.313696000 | 1 | 4.187097000  | 1.556968000  | -4.764550000 |
| 1 | 6.685602000  | 4.552636000  | -0.340631000 | 1 | 5.801621000  | 0.966630000  | -5.124231000 |
| 6 | 5.580289000  | -0.700395000 | 2.748290000  | 6 | 4.462876000  | 3.521930000  | 0.761087000  |
| 1 | 6.837222000  | 1.008856000  | 0.951053000  | 1 | 3.589034000  | 2.904501000  | 0.897523000  |
| 1 | 7.221929000  | -0.192169000 | -0.272867000 | 6 | 5.315074000  | 3.446704000  | 2.046443000  |
| 6 | 6.985239000  | -0.058845000 | 0.785025000  | 1 | 4.743021000  | 3.810294000  | 2.893390000  |
| 6 | 6.150670000  | -2.390799000 | 1.022888000  | 1 | 5.620915000  | 2.430793000  | 2.254339000  |
| 1 | 7.043398000  | -2.628429000 | 1.620863000  | 1 | 6.206388000  | 4.055923000  | 1.953877000  |
| 1 | 6.400893000  | -2.604863000 | -0.020101000 | 6 | 3.993546000  | 4.978789000  | 0.541888000  |
| 1 | 5.355091000  | -3.072877000 | 1.332314000  | 1 | 4.840462000  | 5.650080000  | 0.466828000  |
| 6 | 2.947802000  | -3.546008000 | -1.369523000 | 1 | 3.405541000  | 5.071900000  | -0.361819000 |
| 1 | 3.048340000  | -2.492109000 | -1.583331000 | 1 | 3.382580000  | 5.298428000  | 1.378448000  |
| 6 | 1.870878000  | -1.746965000 | 3.338946000  | 7 | -3.456694000 | -0.977877000 | -0.828004000 |
| 1 | 2.204969000  | -0.812954000 | 2.910861000  | 6 | -2.705157000 | -0.589909000 | -1.945619000 |
| 6 | 1.748932000  | -4.079557000 | -2.186721000 | 6 | -2.145258000 | 0.639455000  | -2.110582000 |
| 1 | 1.619056000  | -5.141534000 | -2.013498000 | 6 | -2.264181000 | 1.881566000  | -1.328597000 |
| 1 | 0.837074000  | -3.570727000 | -1.913044000 | 7 | -2.927120000 | 1.820176000  | -0.095179000 |

|   |              |              |              |   |              |              |              |
|---|--------------|--------------|--------------|---|--------------|--------------|--------------|
| 6 | -3.115183000 | 3.073713000  | 0.613725000  | 1 | -3.827303000 | 1.830598000  | 3.293035000  |
| 6 | -4.303452000 | 3.801782000  | 0.448198000  | 6 | -2.935620000 | -3.707526000 | 0.278494000  |
| 6 | -4.480378000 | 4.977714000  | 1.162203000  | 1 | -2.400302000 | -2.795155000 | 0.482393000  |
| 6 | -3.515521000 | 5.436286000  | 2.034486000  | 6 | -2.006757000 | -4.663675000 | -0.503687000 |
| 6 | -2.344720000 | 4.726367000  | 2.185899000  | 1 | -1.116691000 | -4.884940000 | 0.077249000  |
| 6 | -2.121120000 | 3.554630000  | 1.475907000  | 1 | -2.517018000 | -5.597249000 | -0.711597000 |
| 6 | -1.720387000 | 3.012289000  | -1.851267000 | 1 | -1.700273000 | -4.231060000 | -1.445483000 |
| 6 | -2.432440000 | -1.636497000 | -3.003003000 | 6 | -3.312353000 | -4.371483000 | 1.623510000  |
| 6 | -4.413170000 | -2.057606000 | -1.031254000 | 1 | -4.039420000 | -3.782111000 | 2.164009000  |
| 6 | -5.595820000 | -1.800603000 | -1.747851000 | 1 | -3.728478000 | -5.359049000 | 1.462868000  |
| 6 | -6.480317000 | -2.838473000 | -1.997084000 | 1 | -2.426751000 | -4.480413000 | 2.241665000  |
| 6 | -6.233846000 | -4.113156000 | -1.533716000 | 6 | -5.951214000 | -0.404759000 | -2.257290000 |
| 6 | -5.093824000 | -4.356580000 | -0.801260000 | 1 | -5.211281000 | 0.286199000  | -1.890463000 |
| 6 | -4.173984000 | -3.349484000 | -0.538137000 | 6 | -5.944970000 | -0.342434000 | -3.800911000 |
| 6 | -4.301974000 | -0.108777000 | 2.355447000  | 1 | -6.678661000 | -1.025155000 | -4.215014000 |
| 1 | -6.156675000 | -1.022390000 | 3.021770000  | 1 | -6.189438000 | 0.661567000  | -4.132334000 |
| 1 | -4.068257000 | -1.141240000 | 4.255843000  | 1 | -4.972401000 | -0.599429000 | -4.198981000 |
| 1 | -2.586534000 | -0.353716000 | 3.699238000  | 6 | -7.331523000 | 0.042410000  | -1.726921000 |
| 1 | -3.109541000 | -1.865047000 | 2.955801000  | 1 | -8.121706000 | -0.596461000 | -2.102712000 |
| 1 | -1.540898000 | 0.758164000  | -3.004751000 | 1 | -7.356809000 | 0.015905000  | -0.645166000 |
| 1 | -5.382567000 | 5.541184000  | 1.037412000  | 1 | -7.539161000 | 1.056163000  | -2.050829000 |
| 1 | -3.673680000 | 6.342510000  | 2.586007000  | 6 | -5.389283000 | 3.352368000  | -0.523936000 |
| 1 | -1.592026000 | 5.089032000  | 2.857470000  | 1 | -5.183137000 | 2.328594000  | -0.787888000 |
| 1 | -1.772837000 | 3.965924000  | -1.346236000 | 6 | -6.802203000 | 3.426242000  | 0.094881000  |
| 1 | -1.267045000 | 2.978164000  | -2.835114000 | 1 | -7.087890000 | 4.449797000  | 0.305597000  |
| 1 | -1.878828000 | -2.474486000 | -2.571991000 | 1 | -7.528839000 | 3.019235000  | -0.598877000 |
| 1 | -3.352821000 | -2.050189000 | -3.415533000 | 1 | -6.855690000 | 2.859769000  | 1.016311000  |
| 1 | -1.841899000 | -1.210439000 | -3.816174000 | 6 | -5.333436000 | 4.202867000  | -1.813485000 |
| 1 | -7.374723000 | -2.646346000 | -2.554913000 | 1 | -4.360770000 | 4.117629000  | -2.278166000 |
| 1 | -6.927658000 | -4.905783000 | -1.734614000 | 1 | -6.087031000 | 3.866380000  | -2.519824000 |
| 1 | -4.909772000 | -5.345287000 | -0.431797000 | 1 | -5.522970000 | 5.246191000  | -1.583940000 |
| 6 | -3.464482000 | -0.913805000 | 3.362300000  | 6 | -0.784924000 | 2.839572000  | 1.642233000  |
| 1 | -5.426788000 | -1.871983000 | 1.649510000  | 1 | -0.758844000 | 2.015451000  | 0.951072000  |
| 1 | -6.262352000 | -0.342459000 | 1.393961000  | 6 | 0.392097000  | 3.776900000  | 1.303338000  |
| 6 | -5.601600000 | -0.883225000 | 2.079571000  | 1 | 0.457084000  | 4.598727000  | 2.007331000  |
| 6 | -4.690855000 | 1.213036000  | 3.034423000  | 1 | 1.323039000  | 3.222010000  | 1.344985000  |
| 1 | -5.235457000 | 0.996581000  | 3.968377000  | 1 | 0.277316000  | 4.180680000  | 0.305874000  |
| 1 | -5.345870000 | 1.823584000  | 2.409392000  | 6 | -0.623775000 | 2.280652000  | 3.071174000  |

|                                  |              |              |              |   |             |              |              |
|----------------------------------|--------------|--------------|--------------|---|-------------|--------------|--------------|
| 1                                | -1.411132000 | 1.573430000  | 3.292011000  | 1 | 4.657176000 | -0.469088000 | 5.726989000  |
| 1                                | 0.329224000  | 1.768931000  | 3.169315000  | 1 | 4.912283000 | -2.895381000 | 5.760192000  |
| 1                                | -0.660992000 | 3.076921000  | 3.805999000  | 1 | 4.203585000 | -4.234711000 | 3.846461000  |
| 1                                | -0.871834000 | -0.732164000 | 0.610109000  | 6 | 6.905003000 | -0.834170000 | -0.901295000 |
| 1                                | -1.572967000 | -0.294276000 | 1.092326000  | 1 | 6.454357000 | -1.931791000 | 1.613142000  |
| 13                               | 4.088829000  | -0.416604000 | 0.345150000  | 1 | 6.433630000 | -0.420716000 | 2.512447000  |
| 13                               | -3.262854000 | 0.153078000  | 0.659349000  | 6 | 6.773139000 | -0.887810000 | 1.587180000  |
| <i>AI-inter-IM<sub>1,4</sub></i> |              |              |              | 6 | 6.833320000 | 1.294075000  | 0.373422000  |
| 7                                | 3.026072000  | -0.517540000 | 1.423765000  | 1 | 7.927021000 | 1.258170000  | 0.483862000  |
| 6                                | 1.699122000  | -0.330624000 | 1.202949000  | 1 | 6.443917000 | 1.873063000  | 1.217540000  |
| 6                                | 1.205203000  | 0.226644000  | 0.015396000  | 1 | 6.616305000 | 1.835710000  | -0.549126000 |
| 6                                | 1.918273000  | 0.679129000  | -1.092121000 | 6 | 4.136901000 | 3.455359000  | -0.979394000 |
| 7                                | 3.281223000  | 0.668783000  | -1.150308000 | 1 | 4.048879000 | 2.827239000  | -0.102871000 |
| 6                                | 3.989477000  | 1.254525000  | -2.296516000 | 6 | 3.615053000 | -0.900658000 | -3.653666000 |
| 6                                | 4.470364000  | 2.569765000  | -2.184978000 | 1 | 2.977186000 | -1.132278000 | -2.814077000 |
| 6                                | 5.222325000  | 3.081018000  | -3.231235000 | 6 | 2.775837000 | 4.160219000  | -1.193112000 |
| 6                                | 5.493973000  | 2.319867000  | -4.351570000 | 1 | 2.810628000 | 4.759850000  | -2.095141000 |
| 6                                | 4.994087000  | 1.041574000  | -4.456072000 | 1 | 1.966888000 | 3.451378000  | -1.283086000 |
| 6                                | 4.222343000  | 0.487569000  | -3.441396000 | 1 | 2.558882000 | 4.812903000  | -0.354467000 |
| 6                                | 0.683185000  | -0.751441000 | 2.206372000  | 6 | 5.206614000 | 4.529108000  | -0.685464000 |
| 6                                | 3.481258000  | -1.173457000 | 2.655959000  | 1 | 4.982312000 | 5.001863000  | 0.264063000  |
| 6                                | 3.855606000  | -0.393699000 | 3.753965000  | 1 | 6.201879000 | 4.108237000  | -0.630568000 |
| 6                                | 4.368616000  | -1.041257000 | 4.869121000  | 1 | 5.199311000 | 5.304000000  | -1.442199000 |
| 6                                | 4.507700000  | -2.413649000 | 4.892426000  | 6 | 2.747795000 | -0.920280000 | -4.934869000 |
| 6                                | 4.110233000  | -3.168835000 | 3.808224000  | 1 | 3.364677000 | -0.804492000 | -5.817554000 |
| 6                                | 3.578819000  | -2.567692000 | 2.676594000  | 1 | 2.227923000 | -1.868097000 | -5.011103000 |
| 6                                | 6.291297000  | -0.147217000 | 0.329723000  | 1 | 2.012860000 | -0.126191000 | -4.928440000 |
| 1                                | 7.872953000  | -0.878952000 | 1.595070000  | 6 | 4.692961000 | -2.001902000 | -3.751634000 |
| 1                                | 6.624306000  | -1.889692000 | -0.971852000 | 1 | 5.264400000 | -2.079110000 | -2.837550000 |
| 1                                | 8.000890000  | -0.799624000 | -0.815144000 | 1 | 4.221455000 | -2.960342000 | -3.939160000 |
| 1                                | 6.634320000  | -0.337662000 | -1.836373000 | 1 | 5.379050000 | -1.798238000 | -4.565023000 |
| 1                                | 0.121502000  | 0.295566000  | -0.058704000 | 6 | 3.670633000 | 1.123615000  | 3.785246000  |
| 1                                | 5.600707000  | 4.079480000  | -3.175888000 | 1 | 3.386215000 | 1.455047000  | 2.797138000  |
| 1                                | 6.084203000  | 2.731320000  | -5.145990000 | 6 | 4.964690000 | 1.864953000  | 4.186261000  |
| 1                                | 5.192150000  | 0.469170000  | -5.338954000 | 1 | 5.252592000 | 1.626081000  | 5.202336000  |
| 1                                | 0.114497000  | -1.609415000 | 1.809595000  | 1 | 5.787548000 | 1.607495000  | 3.531794000  |
| 1                                | 1.109290000  | -1.021572000 | 3.168059000  | 1 | 4.804831000 | 2.936283000  | 4.130619000  |
| 1                                | -0.066617000 | 0.038188000  | 2.320503000  | 6 | 2.530402000 | 1.503323000  | 4.758560000  |



|   |              |              |              |   |              |              |              |
|---|--------------|--------------|--------------|---|--------------|--------------|--------------|
| 1 | 2.376595000  | 2.576970000  | 4.751787000  | 1 | -5.824203000 | -5.033981000 | -1.048474000 |
| 1 | 1.600993000  | 1.024382000  | 4.480937000  | 1 | -4.272147000 | -5.959396000 | -2.697406000 |
| 1 | 2.781918000  | 1.201586000  | 5.768431000  | 1 | -2.177800000 | -4.798850000 | -3.176138000 |
| 6 | 3.105598000  | -3.435686000 | 1.509655000  | 1 | -2.075337000 | -3.740338000 | 1.043968000  |
| 1 | 2.560219000  | -2.815208000 | 0.816101000  | 1 | -1.824193000 | -2.928512000 | 2.693043000  |
| 6 | 4.306842000  | -4.049579000 | 0.757323000  | 1 | -2.694977000 | 2.448621000  | 3.150239000  |
| 1 | 3.959466000  | -4.665350000 | -0.064757000 | 1 | -4.310865000 | 1.873421000  | 3.491241000  |
| 1 | 4.951841000  | -3.276667000 | 0.352577000  | 1 | -2.914151000 | 0.980029000  | 4.117836000  |
| 1 | 4.900774000  | -4.666688000 | 1.420974000  | 1 | -7.589068000 | 3.748042000  | 1.160548000  |
| 6 | 2.140666000  | -4.546288000 | 1.979422000  | 1 | -6.344208000 | 5.845970000  | 1.053242000  |
| 1 | 2.641700000  | -5.257723000 | 2.624356000  | 1 | -3.913963000 | 5.810498000  | 0.811390000  |
| 1 | 1.297381000  | -4.126370000 | 2.512943000  | 6 | -2.906710000 | 0.989790000  | -3.538959000 |
| 1 | 1.759755000  | -5.083500000 | 1.118491000  | 1 | -4.415699000 | 2.860661000  | -2.163220000 |
| 7 | -3.779840000 | 1.205124000  | 0.846264000  | 1 | -5.807018000 | 1.828733000  | -1.868311000 |
| 6 | -3.250945000 | 0.694093000  | 2.013204000  | 6 | -4.934157000 | 1.962461000  | -2.510986000 |
| 6 | -2.653619000 | -0.534560000 | 2.116096000  | 6 | -4.878669000 | -0.445163000 | -3.068788000 |
| 6 | -2.594442000 | -1.658061000 | 1.176250000  | 1 | -5.308888000 | -0.179537000 | -4.050292000 |
| 7 | -3.093168000 | -1.467931000 | -0.115200000 | 1 | -5.715260000 | -0.683232000 | -2.404075000 |
| 6 | -3.405573000 | -2.678335000 | -0.844035000 | 1 | -4.299440000 | -1.362962000 | -3.199486000 |
| 6 | -4.613485000 | -3.348226000 | -0.579230000 | 6 | -2.238074000 | 3.717360000  | 0.658161000  |
| 6 | -4.905070000 | -4.522274000 | -1.254094000 | 1 | -1.863417000 | 2.716582000  | 0.797564000  |
| 6 | -4.032850000 | -5.047797000 | -2.185031000 | 6 | -1.552810000 | 4.653692000  | 1.678974000  |
| 6 | -2.853470000 | -4.389069000 | -2.452187000 | 1 | -0.473721000 | 4.566078000  | 1.590296000  |
| 6 | -2.524307000 | -3.208461000 | -1.797212000 | 1 | -1.815669000 | 5.689516000  | 1.499927000  |
| 6 | -2.092113000 | -2.843240000 | 1.645345000  | 1 | -1.833345000 | 4.405321000  | 2.695046000  |
| 6 | -3.295255000 | 1.545332000  | 3.265193000  | 6 | -1.866909000 | 4.157935000  | -0.774539000 |
| 6 | -4.468335000 | 2.477207000  | 0.899207000  | 1 | -2.274271000 | 3.464555000  | -1.495256000 |
| 6 | -5.868756000 | 2.501124000  | 1.003531000  | 1 | -2.256389000 | 5.147779000  | -0.984721000 |
| 6 | -6.522413000 | 3.722156000  | 1.069070000  | 1 | -0.786970000 | 4.181667000  | -0.894592000 |
| 6 | -5.822612000 | 4.909774000  | 1.007488000  | 6 | -6.676366000 | 1.205520000  | 1.046330000  |
| 6 | -4.451430000 | 4.885327000  | 0.875474000  | 1 | -6.057340000 | 0.431046000  | 0.623933000  |
| 6 | -3.757024000 | 3.684129000  | 0.824148000  | 6 | -7.014867000 | 0.814248000  | 2.502538000  |
| 6 | -4.035638000 | 0.718016000  | -2.529724000 | 1 | -7.582805000 | 1.605263000  | 2.981240000  |
| 1 | -5.306618000 | 2.172338000  | -3.529120000 | 1 | -7.609836000 | -0.093717000 | 2.519235000  |
| 1 | -3.324008000 | 1.163189000  | -4.545746000 | 1 | -6.115934000 | 0.635143000  | 3.076124000  |
| 1 | -2.205468000 | 0.151791000  | -3.613591000 | 6 | -7.981732000 | 1.290361000  | 0.225108000  |
| 1 | -2.322558000 | 1.877990000  | -3.269204000 | 1 | -8.699475000 | 1.958157000  | 0.687755000  |
| 1 | -2.263284000 | -0.779274000 | 3.098819000  | 1 | -7.788737000 | 1.636607000  | -0.782118000 |

|                                     |              |              |              |   |              |              |              |
|-------------------------------------|--------------|--------------|--------------|---|--------------|--------------|--------------|
| 1                                   | -8.436765000 | 0.307876000  | 0.167235000  | 6 | -6.398245000 | -4.025542000 | -1.155896000 |
| 6                                   | -5.607957000 | -2.823700000 | 0.451673000  | 6 | -6.742630000 | -2.767232000 | -1.610149000 |
| 1                                   | -5.251200000 | -1.863764000 | 0.786006000  | 6 | -5.825307000 | -1.728988000 | -1.601070000 |
| 6                                   | -7.014298000 | -2.637963000 | -0.158845000 | 6 | -1.250854000 | 2.935546000  | -1.666217000 |
| 1                                   | -7.435523000 | -3.586773000 | -0.471003000 | 6 | -2.866985000 | 2.996224000  | 0.671910000  |
| 1                                   | -7.682459000 | -2.204244000 | 0.578678000  | 6 | -1.868413000 | 3.328243000  | 1.589402000  |
| 1                                   | -6.978972000 | -1.981127000 | -1.018365000 | 6 | -2.031461000 | 4.489858000  | 2.337457000  |
| 6                                   | -5.684000000 | -3.767596000 | 1.672158000  | 6 | -3.136705000 | 5.292567000  | 2.180134000  |
| 1                                   | -4.705353000 | -3.879556000 | 2.117505000  | 6 | -4.115549000 | 4.950685000  | 1.266600000  |
| 1                                   | -6.361127000 | -3.360739000 | 2.417733000  | 6 | -4.004797000 | 3.801502000  | 0.501813000  |
| 1                                   | -6.052108000 | -4.744966000 | 1.377510000  | 6 | -4.913662000 | 0.074374000  | 2.016000000  |
| 6                                   | -1.193249000 | -2.537643000 | -2.123135000 | 1 | -5.309397000 | 0.984708000  | 3.933998000  |
| 1                                   | -1.222845000 | -1.536497000 | -1.725610000 | 1 | -6.543915000 | 1.168734000  | 1.007362000  |
| 6                                   | -0.024543000 | -3.287916000 | -1.444952000 | 1 | -7.035757000 | 0.221060000  | 2.411772000  |
| 1                                   | 0.029418000  | -4.308132000 | -1.810585000 | 1 | -6.666229000 | -0.597903000 | 0.891291000  |
| 1                                   | 0.920613000  | -2.794716000 | -1.664836000 | 1 | -1.423284000 | 0.750832000  | -3.013926000 |
| 1                                   | -0.167537000 | -3.307398000 | -0.373772000 | 1 | -4.855871000 | -5.252649000 | -0.377223000 |
| 6                                   | -0.941220000 | -2.457607000 | -3.645387000 | 1 | -7.124401000 | -4.813922000 | -1.164114000 |
| 1                                   | -1.795931000 | -2.041675000 | -4.161768000 | 1 | -7.733846000 | -2.597034000 | -1.973759000 |
| 1                                   | -0.080287000 | -1.827312000 | -3.845342000 | 1 | -1.116108000 | 2.965388000  | -2.747997000 |
| 1                                   | -0.733643000 | -3.436689000 | -4.061556000 | 1 | -1.667827000 | 3.875980000  | -1.313991000 |
| 1                                   | -1.602474000 | 0.829449000  | -0.817509000 | 1 | -0.262452000 | 2.816396000  | -1.208096000 |
| 6                                   | 1.105331000  | 1.144949000  | -2.265668000 | 1 | -1.277587000 | 4.763048000  | 3.046237000  |
| 1                                   | 0.781962000  | 0.263321000  | -2.828086000 | 1 | -3.240373000 | 6.184552000  | 2.765417000  |
| 1                                   | 0.189299000  | 1.625963000  | -1.915814000 | 1 | -4.969355000 | 5.584821000  | 1.154237000  |
| 1                                   | 1.659797000  | 1.795208000  | -2.937241000 | 6 | -6.366541000 | 0.229625000  | 1.538592000  |
| 13                                  | -3.153986000 | 0.334325000  | -0.745426000 | 1 | -4.785462000 | 2.159639000  | 2.718249000  |
| 13                                  | 4.315442000  | -0.057845000 | 0.193671000  | 1 | -3.610221000 | 1.082917000  | 3.476390000  |
| <i>Al-inter-TS<sub>1,4</sub>-II</i> |              |              |              | 6 | -4.629058000 | 1.142663000  | 3.084127000  |
| 7                                   | -2.771689000 | 1.754497000  | -0.117904000 | 6 | -4.791398000 | -1.307135000 | 2.680369000  |
| 6                                   | -2.086316000 | 1.750307000  | -1.275233000 | 1 | -5.538154000 | -1.383699000 | 3.484081000  |
| 6                                   | -2.066841000 | 0.650202000  | -2.148278000 | 1 | -3.811385000 | -1.464415000 | 3.145925000  |
| 6                                   | -2.778456000 | -0.550054000 | -2.062008000 | 1 | -4.980702000 | -2.125684000 | 1.981454000  |
| 7                                   | -3.588257000 | -0.855346000 | -1.023960000 | 6 | -2.736623000 | -3.623242000 | -0.262452000 |
| 6                                   | -4.531366000 | -1.987613000 | -1.115302000 | 1 | -2.125020000 | -2.740865000 | -0.325880000 |
| 6                                   | -4.159158000 | -3.264929000 | -0.686467000 | 6 | -6.222241000 | -0.365809000 | -2.174208000 |
| 6                                   | -5.120872000 | -4.269433000 | -0.707535000 | 1 | -5.633960000 | 0.396414000  | -1.685798000 |
|                                     |              |              |              | 6 | -2.137931000 | -4.686225000 | -1.214551000 |

|   |              |              |              |   |              |              |              |
|---|--------------|--------------|--------------|---|--------------|--------------|--------------|
| 1 | -2.658996000 | -5.630663000 | -1.110322000 | 1 | -3.338117000 | -2.276596000 | -3.251027000 |
| 1 | -2.202104000 | -4.377121000 | -2.249869000 | 1 | -2.278302000 | -0.494248000 | 1.785075000  |
| 1 | -1.094706000 | -4.843385000 | -0.968764000 | 1 | -1.699073000 | -0.477948000 | 1.284485000  |
| 6 | -2.666241000 | -4.151415000 | 1.187196000  | 7 | 3.852883000  | 0.950659000  | -0.701038000 |
| 1 | -1.637001000 | -4.379402000 | 1.440180000  | 6 | 2.610742000  | 1.132112000  | -1.254239000 |
| 1 | -3.033563000 | -3.421671000 | 1.894426000  | 6 | 1.486985000  | 0.437117000  | -0.885113000 |
| 1 | -3.250268000 | -5.057573000 | 1.297983000  | 6 | 1.332377000  | -0.738249000 | -0.031088000 |
| 6 | -5.904294000 | -0.314616000 | -3.687836000 | 7 | 2.446069000  | -1.239579000 | 0.607495000  |
| 1 | -6.443224000 | -1.101303000 | -4.202786000 | 6 | 2.352269000  | -2.571290000 | 1.172010000  |
| 1 | -6.209331000 | 0.640436000  | -4.102202000 | 6 | 2.716623000  | -3.677956000 | 0.379668000  |
| 1 | -4.848889000 | -0.442302000 | -3.877485000 | 6 | 2.683184000  | -4.947621000 | 0.932670000  |
| 6 | -7.713002000 | -0.018052000 | -1.971725000 | 6 | 2.303230000  | -5.144797000 | 2.246238000  |
| 1 | -8.022673000 | -0.150554000 | -0.944188000 | 6 | 1.924079000  | -4.065979000 | 3.011923000  |
| 1 | -7.876824000 | 1.017860000  | -2.248149000 | 6 | 1.923398000  | -2.776382000 | 2.490367000  |
| 1 | -8.346668000 | -0.625857000 | -2.605910000 | 6 | 0.071904000  | -1.295352000 | 0.052077000  |
| 6 | -0.605529000 | 2.497080000  | 1.808203000  | 6 | 2.429199000  | 2.208212000  | -2.306879000 |
| 1 | -0.588541000 | 1.669029000  | 1.116753000  | 6 | 4.966645000  | 1.697790000  | -1.255484000 |
| 6 | -0.562962000 | 1.925346000  | 3.242598000  | 6 | 5.765939000  | 1.110728000  | -2.250169000 |
| 1 | -0.514851000 | 2.724361000  | 3.972887000  | 6 | 6.823669000  | 1.832246000  | -2.782344000 |
| 1 | -1.436382000 | 1.323832000  | 3.456341000  | 6 | 7.116175000  | 3.103786000  | -2.333015000 |
| 1 | 0.317322000  | 1.306268000  | 3.355690000  | 6 | 6.344041000  | 3.669092000  | -1.342407000 |
| 6 | 0.673504000  | 3.331480000  | 1.568579000  | 6 | 5.263102000  | 2.989339000  | -0.796673000 |
| 1 | 1.533355000  | 2.676599000  | 1.612360000  | 6 | 5.695306000  | -0.881999000 | 1.465503000  |
| 1 | 0.659401000  | 3.816139000  | 0.600408000  | 1 | 7.795097000  | -0.340877000 | 1.602017000  |
| 1 | 0.783490000  | 4.096346000  | 2.328442000  | 1 | 6.663471000  | -1.585119000 | 3.283668000  |
| 6 | -5.095263000 | 3.463793000  | -0.516522000 | 1 | 4.942918000  | -1.983514000 | 3.204132000  |
| 1 | -5.127091000 | 2.391587000  | -0.639358000 | 1 | 5.453559000  | -0.323158000 | 3.576867000  |
| 6 | -6.501375000 | 3.922033000  | -0.072540000 | 1 | 0.573735000  | 0.711226000  | -1.401098000 |
| 1 | -7.245470000 | 3.481993000  | -0.727264000 | 1 | 2.964808000  | -5.792455000 | 0.337743000  |
| 1 | -6.716257000 | 3.618628000  | 0.944385000  | 1 | 2.299960000  | -6.132831000 | 2.664251000  |
| 1 | -6.603432000 | 4.998143000  | -0.140630000 | 1 | 1.618152000  | -4.223348000 | 4.027247000  |
| 6 | -4.767971000 | 4.087639000  | -1.892858000 | 1 | -0.105763000 | -2.211164000 | 0.596107000  |
| 1 | -4.658164000 | 5.161202000  | -1.793357000 | 1 | -0.698577000 | -0.913352000 | -0.606146000 |
| 1 | -3.852783000 | 3.685135000  | -2.304055000 | 1 | 2.473710000  | 3.201537000  | -1.854624000 |
| 1 | -5.570039000 | 3.887942000  | -2.595809000 | 1 | 3.211194000  | 2.175326000  | -3.064533000 |
| 6 | -2.540207000 | -1.544276000 | -3.164280000 | 1 | 1.461252000  | 2.092168000  | -2.800661000 |
| 1 | -2.395517000 | -1.032580000 | -4.116440000 | 1 | 7.431980000  | 1.394305000  | -3.547356000 |
| 1 | -1.609564000 | -2.073202000 | -2.927058000 | 1 | 7.943906000  | 3.645188000  | -2.748030000 |

|   |             |              |              |    |                                   |              |              |
|---|-------------|--------------|--------------|----|-----------------------------------|--------------|--------------|
| 1 | 6.581932000 | 4.652061000  | -0.987731000 | 1  | 1.516382000                       | -4.744265000 | -1.887720000 |
| 6 | 5.676538000 | -1.206786000 | 2.966087000  | 6  | 1.390225000                       | -1.638117000 | 3.359907000  |
| 1 | 6.712322000 | 1.041661000  | 1.777802000  | 1  | 1.384227000                       | -0.742960000 | 2.759938000  |
| 1 | 6.995137000 | 0.349240000  | 0.180129000  | 6  | -0.056724000                      | -1.941940000 | 3.814401000  |
| 6 | 6.852374000 | 0.101360000  | 1.234818000  | 1  | -0.083834000                      | -2.803956000 | 4.470672000  |
| 6 | 6.027582000 | -2.182801000 | 0.730341000  | 1  | -0.460724000                      | -1.095516000 | 4.361134000  |
| 1 | 7.024881000 | -2.548291000 | 1.033092000  | 1  | -0.691671000                      | -2.140884000 | 2.961843000  |
| 1 | 6.047069000 | -2.057913000 | -0.355680000 | 6  | 2.267425000                       | -1.382926000 | 4.603397000  |
| 1 | 5.307397000 | -2.970340000 | 0.965592000  | 1  | 3.252113000                       | -1.050769000 | 4.315684000  |
| 6 | 4.438018000 | 3.675519000  | 0.290513000  | 1  | 1.818275000                       | -0.611171000 | 5.222001000  |
| 1 | 3.581481000 | 3.056635000  | 0.497257000  | 1  | 2.362833000                       | -2.282253000 | 5.201944000  |
| 6 | 3.948697000 | 5.073981000  | -0.152044000 | 1  | 3.400090000                       | 0.989864000  | 2.090238000  |
| 1 | 3.281969000 | 5.484450000  | 0.600034000  | 13 | 3.921505000                       | -0.044415000 | 0.960989000  |
| 1 | 4.779674000 | 5.759890000  | -0.267364000 | 13 | -3.646382000                      | 0.224839000  | 0.501013000  |
| 1 | 3.416883000 | 5.029570000  | -1.094785000 |    |                                   |              |              |
| 6 | 5.246438000 | 3.805535000  | 1.599438000  |    | <i>Al-inter-TS<sub>1,4'</sub></i> |              |              |
| 1 | 5.517362000 | 2.829560000  | 1.972044000  | 1  | -0.073994000                      | -0.141665000 | -0.551768000 |
| 1 | 6.149984000 | 4.382965000  | 1.437741000  | 1  | 0.937427000                       | 0.145930000  | -0.292069000 |
| 1 | 4.650868000 | 4.303193000  | 2.358695000  | 7  | 3.194597000                       | -1.550084000 | -0.236486000 |
| 6 | 5.492847000 | -0.305453000 | -2.751827000 | 6  | 3.100322000                       | -1.875112000 | 1.129121000  |
| 1 | 4.888854000 | -0.795725000 | -2.006787000 | 6  | 3.088611000                       | -0.964800000 | 2.139223000  |
| 6 | 4.702406000 | -0.285201000 | -4.079744000 | 6  | 3.315462000                       | 0.492726000  | 2.143166000  |
| 1 | 5.255172000 | 0.260004000  | -4.837627000 | 7  | 3.289030000                       | 1.159702000  | 0.912042000  |
| 1 | 4.541633000 | -1.298555000 | -4.435502000 | 6  | 3.476121000                       | 2.599578000  | 0.934132000  |
| 1 | 3.735398000 | 0.182136000  | -3.951895000 | 6  | 4.732624000                       | 3.156836000  | 0.651695000  |
| 6 | 6.790384000 | -1.121025000 | -2.946088000 | 6  | 4.871807000                       | 4.537107000  | 0.626039000  |
| 1 | 7.356370000 | -0.764974000 | -3.799490000 | 6  | 3.798489000                       | 5.368612000  | 0.865112000  |
| 1 | 7.420651000 | -1.068504000 | -2.068120000 | 6  | 2.569559000                       | 4.820621000  | 1.160151000  |
| 1 | 6.541355000 | -2.161437000 | -3.127117000 | 6  | 2.394342000                       | 3.445207000  | 1.215271000  |
| 6 | 3.106725000 | -3.502913000 | -1.086951000 | 6  | 3.525213000                       | 1.096496000  | 3.342520000  |
| 1 | 3.438102000 | -2.484907000 | -1.209331000 | 6  | 2.942118000                       | -3.335637000 | 1.489327000  |
| 6 | 4.235610000 | -4.453239000 | -1.542638000 | 6  | 3.911754000                       | -2.517458000 | -1.059969000 |
| 1 | 3.888299000 | -5.478896000 | -1.600235000 | 6  | 5.307817000                       | -2.636824000 | -0.921792000 |
| 1 | 4.566952000 | -4.165940000 | -2.535786000 | 6  | 5.986658000                       | -3.608505000 | -1.640283000 |
| 1 | 5.084630000 | -4.412343000 | -0.874685000 | 6  | 5.326284000                       | -4.445699000 | -2.513391000 |
| 6 | 1.873248000 | -3.724179000 | -1.994468000 | 6  | 3.967645000                       | -4.306049000 | -2.678877000 |
| 1 | 1.079626000 | -3.042684000 | -1.724795000 | 6  | 3.245513000                       | -3.357232000 | -1.966001000 |
| 1 | 2.139355000 | -3.562735000 | -3.035578000 | 6  | 2.808816000                       | 1.002117000  | -2.441096000 |

|   |              |              |              |   |              |              |              |
|---|--------------|--------------|--------------|---|--------------|--------------|--------------|
| 1 | 3.994993000  | 0.791845000  | -4.253184000 | 1 | 7.235011000  | -1.818883000 | 1.852051000  |
| 1 | 1.535459000  | 0.985674000  | -4.215087000 | 1 | 5.875316000  | -2.924950000 | 1.798429000  |
| 1 | 0.640743000  | 1.198088000  | -2.702242000 | 6 | 7.275037000  | -1.051766000 | -0.774651000 |
| 1 | 1.260851000  | -0.392480000 | -3.140173000 | 1 | 8.001343000  | -1.783030000 | -1.108448000 |
| 1 | 2.961909000  | -1.375379000 | 3.135514000  | 1 | 6.904587000  | -0.518107000 | -1.641021000 |
| 1 | 5.828915000  | 4.967753000  | 0.414233000  | 1 | 7.785943000  | -0.347802000 | -0.128020000 |
| 1 | 3.921673000  | 6.433467000  | 0.829251000  | 6 | 5.957643000  | 2.282014000  | 0.413208000  |
| 1 | 1.738720000  | 5.468809000  | 1.356170000  | 1 | 5.605385000  | 1.294239000  | 0.170689000  |
| 1 | 3.709219000  | 2.157892000  | 3.428436000  | 6 | 6.838319000  | 2.787063000  | -0.750291000 |
| 1 | 3.551593000  | 0.496736000  | 4.243972000  | 1 | 7.309426000  | 3.732583000  | -0.509311000 |
| 1 | 2.028918000  | -3.738503000 | 1.042855000  | 1 | 7.627132000  | 2.070467000  | -0.948964000 |
| 1 | 3.769712000  | -3.938565000 | 1.112523000  | 1 | 6.256982000  | 2.914093000  | -1.655312000 |
| 1 | 2.883540000  | -3.458665000 | 2.572602000  | 6 | 6.796244000  | 2.193550000  | 1.709305000  |
| 1 | 7.046362000  | -3.707786000 | -1.519396000 | 1 | 6.203220000  | 1.782643000  | 2.514882000  |
| 1 | 5.866017000  | -5.191676000 | -3.062998000 | 1 | 7.664173000  | 1.558797000  | 1.557029000  |
| 1 | 3.455277000  | -4.948820000 | -3.366211000 | 1 | 7.142566000  | 3.180722000  | 1.997112000  |
| 6 | 1.490883000  | 0.677213000  | -3.157139000 | 6 | 1.025585000  | 2.895584000  | 1.600218000  |
| 1 | 3.880255000  | -0.710767000 | -3.321550000 | 1 | 1.116953000  | 1.829243000  | 1.717370000  |
| 1 | 4.938843000  | 0.588861000  | -2.771287000 | 6 | 0.545604000  | 3.491047000  | 2.940568000  |
| 6 | 3.967776000  | 0.375812000  | -3.232369000 | 1 | 0.412008000  | 4.563766000  | 2.870611000  |
| 6 | 2.980570000  | 2.526747000  | -2.475154000 | 1 | -0.409188000 | 3.057454000  | 3.218583000  |
| 1 | 2.957816000  | 2.876387000  | -3.520991000 | 1 | 1.262052000  | 3.280654000  | 3.724190000  |
| 1 | 3.927347000  | 2.851127000  | -2.040418000 | 6 | -0.010834000 | 3.172405000  | 0.494376000  |
| 1 | 2.185220000  | 3.052981000  | -1.938754000 | 1 | 0.300241000  | 2.722005000  | -0.438335000 |
| 6 | 1.743066000  | -3.287492000 | -2.207107000 | 1 | -0.974295000 | 2.752019000  | 0.772235000  |
| 1 | 1.369396000  | -2.444004000 | -1.650047000 | 1 | -0.139299000 | 4.237781000  | 0.340643000  |
| 6 | 1.037416000  | -4.572405000 | -1.715111000 | 7 | -2.533991000 | -0.911847000 | 1.189491000  |
| 1 | -0.037076000 | -4.495735000 | -1.860604000 | 6 | -1.502925000 | -1.334417000 | 0.430014000  |
| 1 | 1.387392000  | -5.430718000 | -2.275997000 | 6 | -1.204652000 | -0.829010000 | -0.865411000 |
| 1 | 1.236654000  | -4.756338000 | -0.668173000 | 6 | -2.145655000 | -0.135808000 | -1.797110000 |
| 6 | 1.419835000  | -3.085267000 | -3.706262000 | 7 | -3.261037000 | 0.529029000  | -1.231635000 |
| 1 | 1.981142000  | -2.260257000 | -4.121245000 | 6 | -4.172744000 | 1.190430000  | -2.165197000 |
| 1 | 1.660915000  | -3.976766000 | -4.272730000 | 6 | -5.237330000 | 0.468436000  | -2.723922000 |
| 1 | 0.360500000  | -2.887147000 | -3.839180000 | 6 | -6.111685000 | 1.120769000  | -3.581504000 |
| 6 | 6.115815000  | -1.722244000 | -0.004614000 | 6 | -5.942786000 | 2.452340000  | -3.893354000 |
| 1 | 5.462582000  | -0.948381000 | 0.359506000  | 6 | -4.882973000 | 3.150488000  | -3.355823000 |
| 6 | 6.674780000  | -2.492455000 | 1.211859000  | 6 | -3.983286000 | 2.539324000  | -2.493819000 |
| 1 | 7.337914000  | -3.287712000 | 0.889008000  | 6 | -1.898553000 | -0.178228000 | -3.118923000 |

|   |              |              |              |    |              |              |              |
|---|--------------|--------------|--------------|----|--------------|--------------|--------------|
| 6 | -0.480358000 | -2.285742000 | 0.967789000  | 1  | -4.230619000 | -1.679755000 | -4.131666000 |
| 6 | -2.855936000 | -1.627760000 | 2.438088000  | 1  | -5.357143000 | -2.899212000 | -3.549541000 |
| 6 | -3.631382000 | -2.791253000 | 2.349567000  | 6  | -6.868403000 | -1.296710000 | -1.900758000 |
| 6 | -3.952015000 | -3.463312000 | 3.519912000  | 1  | -6.991469000 | -2.355129000 | -1.701945000 |
| 6 | -3.522272000 | -3.002031000 | 4.744687000  | 1  | -7.036831000 | -0.753145000 | -0.978971000 |
| 6 | -2.766168000 | -1.852324000 | 4.817444000  | 1  | -7.632138000 | -1.000877000 | -2.608673000 |
| 6 | -2.422365000 | -1.140900000 | 3.675700000  | 6  | -1.805951000 | 3.648949000  | -3.114831000 |
| 6 | -5.048955000 | 1.384477000  | 1.544432000  | 1  | -2.278818000 | 4.253181000  | -3.880956000 |
| 1 | -6.371371000 | 1.210867000  | 3.245467000  | 1  | -0.950386000 | 4.194049000  | -2.730412000 |
| 1 | -3.477044000 | 2.266241000  | 2.824911000  | 1  | -1.451309000 | 2.731795000  | -3.564290000 |
| 1 | -4.982550000 | 3.182920000  | 2.756640000  | 6  | -3.253297000 | 4.668909000  | -1.310096000 |
| 1 | -3.861265000 | 3.234794000  | 1.394259000  | 1  | -3.993063000 | 4.492519000  | -0.538903000 |
| 1 | -0.600548000 | -1.550926000 | -1.413832000 | 1  | -2.400098000 | 5.164723000  | -0.860686000 |
| 1 | -6.927961000 | 0.580027000  | -4.015810000 | 1  | -3.682037000 | 5.344438000  | -2.040433000 |
| 1 | -6.627258000 | 2.940330000  | -4.558772000 | 6  | -4.132290000 | -3.367986000 | 1.025586000  |
| 1 | -4.746858000 | 4.180698000  | -3.614476000 | 1  | -3.833498000 | -2.715937000 | 0.219313000  |
| 1 | -2.532579000 | 0.321062000  | -3.837413000 | 6  | -5.673832000 | -3.461680000 | 1.012283000  |
| 1 | -1.027018000 | -0.702514000 | -3.488388000 | 1  | -6.028265000 | -4.135437000 | 1.781873000  |
| 1 | -0.681359000 | -2.612085000 | 1.983168000  | 1  | -6.123971000 | -2.490613000 | 1.180126000  |
| 1 | -0.398647000 | -3.153665000 | 0.312047000  | 1  | -6.014485000 | -3.836647000 | 0.054264000  |
| 1 | 0.491713000  | -1.766354000 | 0.933486000  | 6  | -3.512811000 | -4.758111000 | 0.757158000  |
| 1 | -4.539196000 | -4.357266000 | 3.470910000  | 1  | -3.837389000 | -5.128771000 | -0.209076000 |
| 1 | -3.774290000 | -3.536307000 | 5.639005000  | 1  | -2.431108000 | -4.712125000 | 0.760479000  |
| 1 | -2.433673000 | -1.503816000 | 5.772611000  | 1  | -3.823815000 | -5.468114000 | 1.513747000  |
| 6 | -4.285619000 | 2.576826000  | 2.158601000  | 6  | -1.557568000 | 0.107489000  | 3.824723000  |
| 1 | -4.949505000 | 0.166221000  | 3.379743000  | 1  | -1.587331000 | 0.658630000  | 2.895647000  |
| 1 | -6.273579000 | -0.276076000 | 2.298261000  | 6  | -2.064847000 | 1.027312000  | 4.959560000  |
| 6 | -5.684623000 | 0.565079000  | 2.677989000  | 1  | -1.529337000 | 1.967959000  | 4.929549000  |
| 6 | -6.172905000 | 1.946609000  | 0.659256000  | 1  | -3.124709000 | 1.228786000  | 4.871167000  |
| 1 | -6.833213000 | 2.571115000  | 1.279537000  | 1  | -1.883079000 | 0.581277000  | 5.929354000  |
| 1 | -6.789691000 | 1.158298000  | 0.220738000  | 6  | -0.090932000 | -0.289789000 | 4.106120000  |
| 1 | -5.800221000 | 2.567344000  | -0.158339000 | 1  | -0.031320000 | -0.844743000 | 5.035968000  |
| 6 | -5.456383000 | -1.020783000 | -2.462723000 | 1  | 0.315128000  | -0.901946000 | 3.314779000  |
| 1 | -4.727425000 | -1.351446000 | -1.738839000 | 1  | 0.535475000  | 0.589192000  | 4.187163000  |
| 6 | -2.801387000 | 3.347829000  | -1.971292000 | 13 | 2.689621000  | 0.235840000  | -0.595570000 |
| 1 | -2.291047000 | 2.751483000  | -1.234159000 | 13 | -3.723958000 | 0.361863000  | 0.499931000  |
| 6 | -5.230570000 | -1.840450000 | -3.753074000 |    |              |              |              |
| 1 | -5.944022000 | -1.555251000 | -4.517103000 |    |              |              |              |

*AI-inter-IM<sub>1,4</sub>*

|   |              |              |              |   |              |              |              |
|---|--------------|--------------|--------------|---|--------------|--------------|--------------|
| 1 | -0.957450000 | 0.579166000  | -0.676686000 | 6 | 1.587892000  | 0.607963000  | -3.233775000 |
| 1 | 1.190097000  | 0.178578000  | -0.216664000 | 1 | 3.844549000  | -1.007490000 | -3.348706000 |
| 7 | 3.314992000  | -1.570791000 | -0.203238000 | 1 | 5.019754000  | 0.225834000  | -2.903495000 |
| 6 | 3.202026000  | -1.798532000 | 1.172105000  | 6 | 4.023254000  | 0.071122000  | -3.333286000 |
| 6 | 3.212681000  | -0.817307000 | 2.118791000  | 6 | 3.265666000  | 2.338108000  | -2.693930000 |
| 6 | 3.512011000  | 0.626316000  | 2.030013000  | 1 | 3.259364000  | 2.625690000  | -3.760084000 |
| 7 | 3.563041000  | 1.205487000  | 0.762863000  | 1 | 4.249115000  | 2.591454000  | -2.292687000 |
| 6 | 3.793429000  | 2.633187000  | 0.697022000  | 1 | 2.539948000  | 2.975990000  | -2.180329000 |
| 6 | 5.073493000  | 3.128276000  | 0.404069000  | 6 | 1.732789000  | -3.335951000 | -2.028141000 |
| 6 | 5.268809000  | 4.497805000  | 0.302176000  | 1 | 1.421213000  | -2.441374000 | -1.512016000 |
| 6 | 4.225687000  | 5.383080000  | 0.474221000  | 6 | 0.969956000  | -4.552359000 | -1.453276000 |
| 6 | 2.969886000  | 4.899278000  | 0.769358000  | 1 | -0.101862000 | -4.435920000 | -1.597768000 |
| 6 | 2.737784000  | 3.536881000  | 0.896279000  | 1 | 1.273706000  | -5.459520000 | -1.961794000 |
| 6 | 3.716307000  | 1.293320000  | 3.201803000  | 1 | 1.169587000  | -4.680730000 | -0.397992000 |
| 6 | 2.990634000  | -3.223877000 | 1.638335000  | 6 | 1.387792000  | -3.198672000 | -3.529284000 |
| 6 | 3.961426000  | -2.618271000 | -0.971010000 | 1 | 1.969212000  | -2.415845000 | -3.994150000 |
| 6 | 5.352928000  | -2.798753000 | -0.856524000 | 1 | 1.584965000  | -4.125793000 | -4.054164000 |
| 6 | 5.967508000  | -3.845041000 | -1.526034000 | 1 | 0.333382000  | -2.968084000 | -3.653884000 |
| 6 | 5.246653000  | -4.701048000 | -2.331299000 | 6 | 6.216082000  | -1.859969000 | -0.018308000 |
| 6 | 3.892596000  | -4.503118000 | -2.478785000 | 1 | 5.599048000  | -1.035604000 | 0.295602000  |
| 6 | 3.235385000  | -3.476901000 | -1.812112000 | 6 | 6.761330000  | -2.567281000 | 1.241631000  |
| 6 | 2.948547000  | 0.843062000  | -2.555300000 | 1 | 7.382086000  | -3.413663000 | 0.966967000  |
| 1 | 4.064097000  | 0.417540000  | -4.380657000 | 1 | 7.362369000  | -1.877092000 | 1.824777000  |
| 1 | 1.634829000  | 0.868345000  | -4.305247000 | 1 | 5.952882000  | -2.919318000 | 1.868607000  |
| 1 | 0.799731000  | 1.225493000  | -2.782762000 | 6 | 7.389092000  | -1.295298000 | -0.849477000 |
| 1 | 1.260218000  | -0.435007000 | -3.166358000 | 1 | 8.076538000  | -2.078809000 | -1.146087000 |
| 1 | 3.065449000  | -1.154597000 | 3.139671000  | 1 | 7.024829000  | -0.802780000 | -1.742548000 |
| 1 | 6.245978000  | 4.877595000  | 0.083333000  | 1 | 7.942279000  | -0.573443000 | -0.259417000 |
| 1 | 4.391712000  | 6.438960000  | 0.383022000  | 6 | 6.258165000  | 2.186410000  | 0.228608000  |
| 1 | 2.160868000  | 5.589367000  | 0.907922000  | 1 | 5.856110000  | 1.207154000  | 0.033642000  |
| 1 | 3.962135000  | 2.345320000  | 3.228756000  | 6 | 7.171769000  | 2.587095000  | -0.949650000 |
| 1 | 3.694774000  | 0.747865000  | 4.137424000  | 1 | 7.683179000  | 3.522835000  | -0.755772000 |
| 1 | 2.051657000  | -3.617608000 | 1.237154000  | 1 | 7.928809000  | 1.825706000  | -1.100882000 |
| 1 | 3.783370000  | -3.887339000 | 1.289006000  | 1 | 6.603477000  | 2.689600000  | -1.866291000 |
| 1 | 2.949841000  | -3.270126000 | 2.728712000  | 6 | 7.077777000  | 2.124235000  | 1.537849000  |
| 1 | 7.024242000  | -3.988269000 | -1.421796000 | 1 | 6.454388000  | 1.788331000  | 2.355420000  |
| 1 | 5.736484000  | -5.505444000 | -2.844337000 | 1 | 7.912475000  | 1.437130000  | 1.431169000  |
| 1 | 3.334334000  | -5.159881000 | -3.115965000 | 1 | 7.473110000  | 3.105992000  | 1.778386000  |

|   |              |              |              |   |              |              |              |
|---|--------------|--------------|--------------|---|--------------|--------------|--------------|
| 6 | 1.332543000  | 3.067714000  | 1.265374000  | 1 | -3.327636000 | -0.686401000 | -3.704631000 |
| 1 | 1.366081000  | 2.001327000  | 1.406739000  | 1 | -1.610345000 | -1.304800000 | -3.355221000 |
| 6 | 0.856508000  | 3.721535000  | 2.580072000  | 1 | -0.585016000 | -2.390627000 | 1.917764000  |
| 1 | 0.781499000  | 4.798015000  | 2.481309000  | 1 | -0.384260000 | -2.782069000 | 0.177918000  |
| 1 | -0.126402000 | 3.345002000  | 2.850017000  | 1 | 0.490102000  | -1.417004000 | 0.830775000  |
| 1 | 1.546824000  | 3.492356000  | 3.381208000  | 1 | -4.393973000 | -4.060812000 | 3.810046000  |
| 6 | 0.331966000  | 3.368815000  | 0.128800000  | 1 | -3.484561000 | -3.143254000 | 5.881013000  |
| 1 | 0.632937000  | 2.861888000  | -0.777972000 | 1 | -2.127940000 | -1.117779000 | 5.834062000  |
| 1 | -0.664428000 | 3.024782000  | 0.404025000  | 6 | -4.131705000 | 2.811230000  | 2.086160000  |
| 1 | 0.275039000  | 4.433121000  | -0.070031000 | 1 | -4.807193000 | 0.545662000  | 3.572111000  |
| 7 | -2.549981000 | -0.722451000 | 1.250949000  | 1 | -6.267576000 | 0.118173000  | 2.672648000  |
| 6 | -1.529300000 | -1.055678000 | 0.501605000  | 6 | -5.590356000 | 0.941916000  | 2.922305000  |
| 6 | -1.362992000 | -0.430496000 | -0.855731000 | 6 | -6.205855000 | 2.195335000  | 0.847135000  |
| 6 | -2.577845000 | -0.349920000 | -1.752862000 | 1 | -6.750606000 | 2.923532000  | 1.465664000  |
| 7 | -3.682017000 | 0.345992000  | -1.204659000 | 1 | -6.918450000 | 1.421889000  | 0.552393000  |
| 6 | -4.636172000 | 0.934187000  | -2.142759000 | 1 | -5.880478000 | 2.709648000  | -0.060401000 |
| 6 | -5.793942000 | 0.239117000  | -2.509106000 | 6 | -6.104883000 | -1.170246000 | -2.010758000 |
| 6 | -6.689104000 | 0.847388000  | -3.379902000 | 1 | -5.303874000 | -1.481379000 | -1.357644000 |
| 6 | -6.446905000 | 2.105620000  | -3.884499000 | 6 | -3.099210000 | 2.981606000  | -2.329927000 |
| 6 | -5.295815000 | 2.778177000  | -3.528233000 | 1 | -2.584446000 | 2.456218000  | -1.541700000 |
| 6 | -4.375289000 | 2.212361000  | -2.660126000 | 6 | -6.169556000 | -2.175272000 | -3.182758000 |
| 6 | -2.513460000 | -0.820489000 | -3.005010000 | 1 | -6.977165000 | -1.925779000 | -3.860116000 |
| 6 | -0.457164000 | -1.982326000 | 0.919962000  | 1 | -5.242221000 | -2.179184000 | -3.739791000 |
| 6 | -2.781572000 | -1.391148000 | 2.553172000  | 1 | -6.345059000 | -3.177090000 | -2.804117000 |
| 6 | -3.563579000 | -2.550491000 | 2.559929000  | 6 | -7.431961000 | -1.201393000 | -1.220013000 |
| 6 | -3.805548000 | -3.167193000 | 3.778434000  | 1 | -7.637644000 | -2.205178000 | -0.866484000 |
| 6 | -3.292279000 | -2.651126000 | 4.948669000  | 1 | -7.393049000 | -0.538294000 | -0.364585000 |
| 6 | -2.527474000 | -1.504775000 | 4.920478000  | 1 | -8.259206000 | -0.890982000 | -1.845789000 |
| 6 | -2.257005000 | -0.846155000 | 3.728369000  | 6 | -2.164269000 | 3.028156000  | -3.559852000 |
| 6 | -5.034576000 | 1.630721000  | 1.667157000  | 1 | -2.638031000 | 3.563759000  | -4.374637000 |
| 1 | -6.169339000 | 1.672294000  | 3.506264000  | 1 | -1.240393000 | 3.537224000  | -3.307531000 |
| 1 | -3.271366000 | 2.500870000  | 2.683827000  | 1 | -1.922838000 | 2.028774000  | -3.896037000 |
| 1 | -4.716909000 | 3.510166000  | 2.701482000  | 6 | -3.395513000 | 4.414232000  | -1.834673000 |
| 1 | -3.761089000 | 3.375922000  | 1.223997000  | 1 | -4.083748000 | 4.407749000  | -0.997490000 |
| 1 | -0.556216000 | -0.951210000 | -1.370243000 | 1 | -2.473310000 | 4.888669000  | -1.517967000 |
| 1 | -7.579928000 | 0.327864000  | -3.669647000 | 1 | -3.826782000 | 5.019909000  | -2.622162000 |
| 1 | -7.147278000 | 2.558934000  | -4.557643000 | 6 | -4.139445000 | -3.181850000 | 1.292832000  |
| 1 | -5.109052000 | 3.751324000  | -3.934058000 | 1 | -3.921001000 | -2.547234000 | 0.446555000  |







|                     |              |              |              |   |              |              |              |
|---------------------|--------------|--------------|--------------|---|--------------|--------------|--------------|
| 1                   | 4.134938000  | 2.572189000  | -2.014053000 | 6 | -2.453814000 | -0.311691000 | 2.667139000  |
| 1                   | 5.934850000  | 0.921130000  | -2.042330000 | 6 | 2.453902000  | -0.312687000 | 2.667056000  |
| 1                   | 5.642165000  | -1.231948000 | -0.926618000 | 6 | 2.711861000  | 0.027074000  | -0.105346000 |
| 1                   | 2.596339000  | -2.168792000 | 1.006248000  | 6 | 3.097401000  | 1.349377000  | -0.336323000 |
| 1                   | 4.479734000  | -3.461084000 | 1.880482000  | 6 | 4.364186000  | 1.593155000  | -0.848063000 |
| 1                   | 5.609386000  | -2.612526000 | 0.842769000  | 6 | 5.223529000  | 0.556998000  | -1.142968000 |
| 1                   | 4.798883000  | -1.752195000 | 2.141773000  | 6 | 4.821889000  | -0.745930000 | -0.936650000 |
| 1                   | 3.217490000  | -4.235666000 | -0.201358000 | 6 | 3.568342000  | -1.035384000 | -0.418329000 |
| 1                   | 2.535614000  | -3.051516000 | -1.309827000 | 6 | 3.154388000  | -2.496002000 | -0.247957000 |
| 1                   | 4.273418000  | -3.310421000 | -1.262658000 | 6 | 4.200395000  | -3.312998000 | 0.542148000  |
| 1                   | 0.878479000  | 2.057608000  | -0.275542000 | 6 | 2.917317000  | -3.137388000 | -1.634193000 |
| 1                   | 0.335516000  | 3.266237000  | -2.360483000 | 6 | 2.166685000  | 2.527707000  | -0.070943000 |
| 1                   | 0.814209000  | 1.609644000  | -2.713854000 | 6 | 1.907498000  | 3.309704000  | -1.377277000 |
| 1                   | 1.941298000  | 2.929801000  | -2.992071000 | 6 | 2.740444000  | 3.468251000  | 1.011596000  |
| 1                   | 1.312522000  | 4.473282000  | -0.329400000 | 1 | -0.000045000 | -0.755072000 | 3.446573000  |
| 1                   | 2.526773000  | 3.688830000  | 0.671048000  | 1 | -1.222779000 | 2.138877000  | 0.276319000  |
| 1                   | 2.929129000  | 4.208770000  | -0.957540000 | 1 | -2.044077000 | 4.277561000  | 1.208390000  |
| 14                  | 0.095436000  | -0.974563000 | -0.501579000 | 1 | -3.677958000 | 3.903679000  | 0.685220000  |
|                     |              |              |              | 1 | -2.916424000 | 2.938331000  | 1.938294000  |
| Si-P <sub>1,4</sub> |              |              |              | 1 | -1.219102000 | 4.126364000  | -1.194395000 |
| 1                   | -0.000173000 | -2.152869000 | -0.304473000 | 1 | -2.827602000 | 3.727264000  | -1.768580000 |
| 7                   | 1.387021000  | -0.257251000 | 0.450028000  | 1 | -1.477694000 | 2.657879000  | -2.129477000 |
| 6                   | 1.248813000  | -0.412733000 | 1.766002000  | 1 | -4.676287000 | 2.602601000  | -1.024817000 |
| 6                   | -0.000030000 | -0.621062000 | 2.373415000  | 1 | -6.197541000 | 0.762659000  | -1.541379000 |
| 6                   | -1.248833000 | -0.412358000 | 1.766016000  | 1 | -5.487490000 | -1.547215000 | -1.185120000 |
| 7                   | -1.387047000 | -0.257076000 | 0.450030000  | 1 | -2.222388000 | -2.530957000 | 0.293319000  |
| 6                   | -2.711879000 | 0.027206000  | -0.105374000 | 1 | -4.406764000 | -2.862443000 | 1.507669000  |
| 6                   | -3.097293000 | 1.349474000  | -0.336840000 | 1 | -3.828031000 | -4.317517000 | 0.710143000  |
| 6                   | -2.166414000 | 2.527796000  | -0.072026000 | 1 | -5.133974000 | -3.390510000 | -0.000919000 |
| 6                   | -2.739972000 | 3.468905000  | 1.010124000  | 1 | -2.584664000 | -4.163949000 | -1.517986000 |
| 6                   | -1.907225000 | 3.309136000  | -1.378761000 | 1 | -3.832988000 | -3.135821000 | -2.214111000 |
| 6                   | -4.364079000 | 1.593184000  | -0.848580000 | 1 | -2.161157000 | -2.592102000 | -2.182411000 |
| 6                   | -5.223549000 | 0.556998000  | -1.143054000 | 1 | -2.895324000 | 0.683999000  | 2.596278000  |
| 6                   | -4.822022000 | -0.745887000 | -0.936303000 | 1 | -2.171078000 | -0.498901000 | 3.703269000  |
| 6                   | -3.568470000 | -1.035276000 | -0.417933000 | 1 | 2.171162000  | -0.499986000 | 3.703171000  |
| 6                   | -3.154642000 | -2.495873000 | -0.247087000 | 1 | 3.224634000  | -1.023578000 | 2.369673000  |
| 6                   | -4.200697000 | -3.312501000 | 0.543331000  | 1 | 2.895840000  | 0.682813000  | 2.596346000  |
| 6                   | -2.917678000 | -3.137738000 | -1.633119000 | 1 | 4.676474000  | 2.602607000  | -1.023946000 |

|                                  |              |              |              |   |              |              |              |
|----------------------------------|--------------|--------------|--------------|---|--------------|--------------|--------------|
| 1                                | 6.197520000  | 0.762696000  | -1.541280000 | 6 | 2.428501000  | -0.253752000 | 2.674065000  |
| 1                                | 5.487282000  | -1.547223000 | -1.185776000 | 6 | 2.686326000  | 0.090573000  | -0.142354000 |
| 1                                | 2.222153000  | -2.531182000 | 0.292478000  | 6 | 2.994453000  | 1.420570000  | -0.429756000 |
| 1                                | 3.827650000  | -4.318041000 | 0.708618000  | 6 | 4.240841000  | 1.710282000  | -0.968687000 |
| 1                                | 5.133648000  | -3.390895000 | -0.002158000 | 6 | 5.150043000  | 0.710442000  | -1.233329000 |
| 1                                | 4.406536000  | -2.863300000 | 1.506638000  | 6 | 4.824811000  | -0.602801000 | -0.963621000 |
| 1                                | 2.584200000  | -4.163603000 | -1.519388000 | 6 | 3.597077000  | -0.938649000 | -0.414312000 |
| 1                                | 2.160844000  | -2.591496000 | -2.183295000 | 6 | 3.276899000  | -2.411349000 | -0.164961000 |
| 1                                | 3.832616000  | -3.135377000 | -2.215202000 | 6 | 4.401374000  | -3.134452000 | 0.608606000  |
| 1                                | 1.223024000  | 2.138744000  | 0.277284000  | 6 | 3.011111000  | -3.126174000 | -1.509339000 |
| 1                                | 1.219416000  | 4.126870000  | -1.192462000 | 6 | 2.009270000  | 2.559809000  | -0.192852000 |
| 1                                | 1.477910000  | 2.658866000  | -2.128325000 | 6 | 1.691857000  | 3.279291000  | -1.522379000 |
| 1                                | 2.827870000  | 3.728010000  | -1.766917000 | 6 | 2.553048000  | 3.562941000  | 0.847899000  |
| 1                                | 2.044685000  | 4.276926000  | 1.210272000  | 1 | 0.073538000  | -1.315613000 | 3.272860000  |
| 1                                | 2.916890000  | 2.937255000  | 1.939522000  | 1 | -1.223751000 | 2.104700000  | 0.376370000  |
| 1                                | 3.678471000  | 3.903024000  | 0.686808000  | 1 | -2.117229000 | 3.946091000  | 1.792076000  |
| 1                                | -3.224890000 | -1.022290000 | 2.369944000  | 1 | -3.753094000 | 3.527551000  | 1.300415000  |
| 14                               | -0.000038000 | -0.702796000 | -0.797317000 | 1 | -2.803101000 | 2.392569000  | 2.254926000  |
|                                  |              |              |              | 1 | -1.380469000 | 4.349067000  | -0.611333000 |
|                                  |              |              |              | 1 | -3.024323000 | 4.052111000  | -1.132516000 |
|                                  |              |              |              | 1 | -1.703482000 | 3.144500000  | -1.854416000 |
|                                  |              |              |              | 1 | -4.669463000 | 2.623193000  | -0.903228000 |
|                                  |              |              |              | 1 | -6.138709000 | 0.809924000  | -1.621083000 |
|                                  |              |              |              | 1 | -5.413579000 | -1.512817000 | -1.397521000 |
|                                  |              |              |              | 1 | -2.168292000 | -2.549834000 | 0.082030000  |
|                                  |              |              |              | 1 | -3.803434000 | -4.298799000 | 0.594934000  |
|                                  |              |              |              | 1 | -5.117090000 | -3.290697000 | 0.013120000  |
|                                  |              |              |              | 1 | -4.211287000 | -2.813933000 | 1.446228000  |
|                                  |              |              |              | 1 | -2.668531000 | -4.196003000 | -1.688097000 |
|                                  |              |              |              | 1 | -3.938797000 | -3.159027000 | -2.320240000 |
|                                  |              |              |              | 1 | -2.261533000 | -2.640226000 | -2.403614000 |
|                                  |              |              |              | 1 | -3.327469000 | -0.240445000 | 2.342355000  |
|                                  |              |              |              | 1 | -2.158386000 | -0.733533000 | 3.701935000  |
|                                  |              |              |              | 1 | 2.175816000  | -0.592239000 | 3.679125000  |
|                                  |              |              |              | 1 | 3.318060000  | -0.776756000 | 2.323952000  |
|                                  |              |              |              | 1 | 2.680666000  | 0.809057000  | 2.722032000  |
|                                  |              |              |              | 1 | 4.495812000  | 2.726738000  | -1.188973000 |
|                                  |              |              |              | 1 | 6.105924000  | 0.950657000  | -1.655083000 |
| <i>Si-intra-TS<sub>1A'</sub></i> |              |              |              |   |              |              |              |
| 7                                | 1.376435000  | -0.236872000 | 0.433132000  |   |              |              |              |
| 6                                | 1.255146000  | -0.439577000 | 1.752211000  |   |              |              |              |
| 6                                | 0.048677000  | -0.999093000 | 2.234462000  |   |              |              |              |
| 6                                | -1.300712000 | -0.564259000 | 1.785256000  |   |              |              |              |
| 7                                | -1.363629000 | -0.289382000 | 0.412261000  |   |              |              |              |
| 6                                | -2.675064000 | 0.010576000  | -0.151536000 |   |              |              |              |
| 6                                | -3.085019000 | 1.341993000  | -0.279716000 |   |              |              |              |
| 6                                | -2.203769000 | 2.501981000  | 0.168291000  |   |              |              |              |
| 6                                | -2.757260000 | 3.131504000  | 1.466234000  |   |              |              |              |
| 6                                | -2.071886000 | 3.576821000  | -0.931776000 |   |              |              |              |
| 6                                | -4.340460000 | 1.608494000  | -0.807141000 |   |              |              |              |
| 6                                | -5.173453000 | 0.586719000  | -1.210585000 |   |              |              |              |
| 6                                | -4.762194000 | -0.722663000 | -1.082575000 |   |              |              |              |
| 6                                | -3.520413000 | -1.033100000 | -0.547577000 |   |              |              |              |
| 6                                | -3.125212000 | -2.500536000 | -0.408873000 |   |              |              |              |
| 6                                | -4.134043000 | -3.272717000 | 0.468611000  |   |              |              |              |
| 6                                | -2.989688000 | -3.164932000 | -1.796724000 |   |              |              |              |
| 6                                | -2.329257000 | -0.510453000 | 2.656390000  |   |              |              |              |

|                                  |              |              |              |   |              |              |              |
|----------------------------------|--------------|--------------|--------------|---|--------------|--------------|--------------|
| 1                                | 5.531778000  | -1.375272000 | -1.186327000 | 6 | 2.280983000  | -0.166989000 | 2.708909000  |
| 1                                | 2.377263000  | -2.475973000 | 0.424974000  | 6 | 2.725882000  | 0.073432000  | -0.141343000 |
| 1                                | 4.087458000  | -4.145596000 | 0.843881000  | 6 | 3.010956000  | 1.414840000  | -0.387636000 |
| 1                                | 5.308042000  | -3.198154000 | 0.020004000  | 6 | 4.269985000  | 1.735412000  | -0.875416000 |
| 1                                | 4.633522000  | -2.625456000 | 1.536959000  | 6 | 5.205018000  | 0.755679000  | -1.132579000 |
| 1                                | 2.753703000  | -4.165821000 | -1.336219000 | 6 | 4.891805000  | -0.568928000 | -0.912491000 |
| 1                                | 2.194273000  | -2.653975000 | -2.039865000 | 6 | 3.650755000  | -0.937949000 | -0.414677000 |
| 1                                | 3.894446000  | -3.090351000 | -2.136526000 | 6 | 3.339470000  | -2.421243000 | -0.222619000 |
| 1                                | 1.091093000  | 2.142867000  | 0.188447000  | 6 | 4.365839000  | -3.103415000 | 0.707786000  |
| 1                                | 0.966749000  | 4.066700000  | -1.356143000 | 6 | 3.287828000  | -3.133210000 | -1.592566000 |
| 1                                | 1.283916000  | 2.582623000  | -2.244847000 | 6 | 1.995691000  | 2.527417000  | -0.152812000 |
| 1                                | 2.584272000  | 3.726493000  | -1.943323000 | 6 | 1.744341000  | 3.308659000  | -1.460709000 |
| 1                                | 1.819510000  | 4.340178000  | 1.033799000  | 6 | 2.464515000  | 3.480794000  | 0.968266000  |
| 1                                | 2.771358000  | 3.070156000  | 1.788113000  | 1 | 0.050598000  | -1.322849000 | 3.224532000  |
| 1                                | 3.462109000  | 4.034001000  | 0.493035000  | 1 | -1.212671000 | 2.070161000  | 0.322757000  |
| 1                                | 0.117209000  | -2.017076000 | 1.200714000  | 1 | -2.018945000 | 4.036642000  | 1.616583000  |
| 1                                | 0.147611000  | -2.212404000 | 0.233107000  | 1 | -3.674744000 | 3.657944000  | 1.165999000  |
| 14                               | -0.020554000 | -0.724309000 | -0.713384000 | 1 | -2.767772000 | 2.551483000  | 2.191359000  |
|                                  |              |              |              | 1 | -1.329364000 | 4.265344000  | -0.813725000 |
|                                  |              |              |              | 1 | -2.969677000 | 3.936649000  | -1.330595000 |
| <i>Si-intra-IM<sub>1,4</sub></i> |              |              |              | 1 | -1.645417000 | 2.963473000  | -1.957301000 |
| 7                                | 1.414922000  | -0.323138000 | 0.399156000  | 1 | -4.698493000 | 2.631998000  | -0.830573000 |
| 6                                | 1.260188000  | -0.509778000 | 1.667854000  | 1 | -6.228387000 | 0.832112000  | -1.449976000 |
| 6                                | 0.022411000  | -1.214001000 | 2.139794000  | 1 | -5.518432000 | -1.499014000 | -1.248055000 |
| 6                                | -1.293717000 | -0.594785000 | 1.724362000  | 1 | -2.194113000 | -2.545960000 | 0.047648000  |
| 7                                | -1.378337000 | -0.335442000 | 0.360051000  | 1 | -3.805647000 | -4.295054000 | 0.670874000  |
| 6                                | -2.702269000 | 0.001317000  | -0.148944000 | 1 | -5.147337000 | -3.285042000 | 0.160817000  |
| 6                                | -3.102157000 | 1.335182000  | -0.272013000 | 1 | -4.160613000 | -2.803777000 | 1.536945000  |
| 6                                | -2.179717000 | 2.489190000  | 0.097961000  | 1 | -2.804063000 | -4.199525000 | -1.680738000 |
| 6                                | -2.695937000 | 3.229816000  | 1.351286000  | 1 | -4.104674000 | -3.158048000 | -2.241817000 |
| 6                                | -2.022490000 | 3.474400000  | -1.079951000 | 1 | -2.432614000 | -2.644981000 | -2.416874000 |
| 6                                | -4.379624000 | 1.613282000  | -0.738601000 | 1 | -3.227490000 | -0.012344000 | 2.389473000  |
| 6                                | -5.246044000 | 0.599751000  | -1.087737000 | 1 | -2.054591000 | -0.634222000 | 3.689144000  |
| 6                                | -4.843506000 | -0.714052000 | -0.971150000 | 1 | 2.574338000  | -1.083489000 | 3.232089000  |
| 6                                | -3.579533000 | -1.033461000 | -0.498951000 | 1 | 3.163656000  | 0.314306000  | 2.297030000  |
| 6                                | -3.181941000 | -2.501426000 | -0.378719000 | 1 | 1.808538000  | 0.485362000  | 3.451227000  |
| 6                                | -4.139365000 | -3.268045000 | 0.558664000  | 1 | 4.516003000  | 2.760676000  | -1.061335000 |
| 6                                | -3.128315000 | -3.167587000 | -1.770955000 | 1 | 6.171057000  | 1.022579000  | -1.512811000 |
| 6                                | -2.250200000 | -0.392876000 | 2.651742000  |   |              |              |              |





|   |              |              |              |   |              |              |              |
|---|--------------|--------------|--------------|---|--------------|--------------|--------------|
| 1 | 0.528557000  | -3.689511000 | 1.856878000  | 6 | 4.693860000  | -3.606149000 | -3.402069000 |
| 1 | -1.120956000 | -1.612638000 | 4.540444000  | 6 | 5.413279000  | -1.332041000 | -4.274302000 |
| 1 | -2.760500000 | -1.810440000 | 3.936539000  | 6 | 6.207861000  | -0.267833000 | 1.568715000  |
| 1 | -1.927462000 | -3.172863000 | 4.676376000  | 6 | 7.226310000  | 0.880918000  | 1.737491000  |
| 1 | -4.664581000 | -2.565548000 | -1.052313000 | 6 | 6.207071000  | -1.182789000 | 2.813392000  |
| 1 | -7.043890000 | -3.252761000 | -1.038297000 | 1 | 3.003412000  | 1.188378000  | 2.137315000  |
| 1 | -6.458208000 | -2.946541000 | 0.591424000  | 1 | 2.148687000  | 1.182118000  | 4.449442000  |
| 1 | -6.659149000 | -4.600241000 | 0.019662000  | 1 | 1.634967000  | 2.851721000  | 4.293113000  |
| 1 | -5.443134000 | -4.069252000 | -2.839357000 | 1 | 0.845267000  | 1.603276000  | 3.344943000  |
| 1 | -3.777499000 | -4.460741000 | -2.444247000 | 1 | 4.568564000  | 1.845441000  | 3.903012000  |
| 1 | -5.082613000 | -5.479696000 | -1.859275000 | 1 | 4.049801000  | 3.516810000  | 3.793782000  |
| 1 | -0.681649000 | 0.193502000  | -0.283959000 | 1 | 4.907872000  | 2.784562000  | 2.448968000  |
| 1 | -2.416911000 | 0.095517000  | 1.774940000  | 1 | 2.251434000  | 4.712383000  | 3.013349000  |
| 7 | 4.220655000  | -0.689837000 | -0.590783000 | 1 | 1.555853000  | 6.417316000  | 1.409822000  |
| 6 | 3.236104000  | -1.421610000 | -0.196942000 | 1 | 1.266634000  | 5.836376000  | -0.943396000 |
| 6 | 1.509570000  | 0.489184000  | 0.071413000  | 1 | 1.636655000  | 2.413636000  | -2.323835000 |
| 7 | 2.400295000  | 1.436867000  | -0.227421000 | 1 | 0.072085000  | 3.652498000  | -3.719580000 |
| 6 | 2.158432000  | 2.814543000  | 0.235209000  | 1 | 0.109491000  | 5.027406000  | -2.635435000 |
| 6 | 2.352129000  | 3.140378000  | 1.582647000  | 1 | -0.598319000 | 3.504627000  | -2.104436000 |
| 6 | 2.836298000  | 2.136388000  | 2.624960000  | 1 | 2.586918000  | 3.899355000  | -4.056503000 |
| 6 | 1.794779000  | 1.930046000  | 3.746754000  | 1 | 2.648361000  | 5.228750000  | -2.908704000 |
| 6 | 4.179792000  | 2.602124000  | 3.228756000  | 1 | 3.681538000  | 3.827811000  | -2.679883000 |
| 6 | 2.118759000  | 4.446221000  | 1.984609000  | 1 | -0.078894000 | 1.647545000  | 0.935473000  |
| 6 | 1.727770000  | 5.411753000  | 1.080825000  | 1 | -0.068530000 | -0.131556000 | 1.332133000  |
| 6 | 1.563881000  | 5.081273000  | -0.245773000 | 1 | 2.796762000  | -3.493511000 | -0.294518000 |
| 6 | 1.768487000  | 3.782940000  | -0.693229000 | 1 | 4.403154000  | -3.142448000 | 0.396816000  |
| 6 | 1.579942000  | 3.481546000  | -2.178092000 | 1 | 2.909841000  | -2.845948000 | 1.334335000  |
| 6 | 0.198754000  | 3.948811000  | -2.683292000 | 1 | 8.498251000  | -1.518540000 | 0.922674000  |
| 6 | 2.700906000  | 4.150625000  | -3.007193000 | 1 | 9.067653000  | -2.776046000 | -1.090247000 |
| 6 | 0.227349000  | 0.651199000  | 0.636523000  | 1 | 7.428580000  | -3.032438000 | -2.882043000 |
| 6 | 3.370158000  | -2.810684000 | 0.342262000  | 1 | 3.958377000  | -1.698821000 | -2.763483000 |
| 6 | 5.578904000  | -1.258887000 | -0.710392000 | 1 | 3.944882000  | -3.690394000 | -4.181885000 |
| 6 | 6.511192000  | -1.068778000 | 0.307157000  | 1 | 5.607768000  | -4.056289000 | -3.769131000 |
| 6 | 7.767062000  | -1.638004000 | 0.150229000  | 1 | 4.358927000  | -4.174626000 | -2.541868000 |
| 6 | 8.090881000  | -2.347410000 | -0.986379000 | 1 | 4.698565000  | -1.415201000 | -5.085763000 |
| 6 | 7.162469000  | -2.495578000 | -1.994946000 | 1 | 5.536397000  | -0.283930000 | -4.032323000 |
| 6 | 5.889627000  | -1.956289000 | -1.881307000 | 1 | 6.364892000  | -1.720864000 | -4.616249000 |
| 6 | 4.910821000  | -2.119638000 | -3.043630000 | 1 | 5.228561000  | 0.175141000  | 1.470619000  |



|                                  |              |              |              |   |             |              |              |
|----------------------------------|--------------|--------------|--------------|---|-------------|--------------|--------------|
| 1                                | 6.987852000  | 1.459523000  | 2.621355000  | 6 | 5.417014000 | -4.579223000 | -2.159321000 |
| 1                                | 7.200782000  | 1.537576000  | 0.876973000  | 6 | 4.113849000 | -4.360539000 | -2.553110000 |
| 1                                | 8.231960000  | 0.495824000  | 1.851777000  | 6 | 3.371732000 | -3.317704000 | -2.019183000 |
| 1                                | 5.953173000  | -0.608016000 | 3.697195000  | 6 | 1.957432000 | -3.075975000 | -2.535737000 |
| 1                                | 5.487144000  | -1.987004000 | 2.711402000  | 6 | 1.101654000 | -4.361895000 | -2.525878000 |
| 1                                | 7.185630000  | -1.622259000 | 2.966027000  | 6 | 2.015970000 | -2.487522000 | -3.963604000 |
| 1                                | 3.287169000  | 0.609246000  | -2.420619000 | 6 | 6.006866000 | -1.729165000 | 0.267018000  |
| 6                                | -2.765615000 | 0.749925000  | -1.220463000 | 6 | 7.123675000 | -0.977376000 | -0.492400000 |
| 6                                | -2.665045000 | 1.683167000  | -2.200131000 | 6 | 6.586726000 | -2.474603000 | 1.488398000  |
| 1                                | -3.361233000 | 2.504756000  | -2.286838000 | 1 | 1.156313000 | -0.826011000 | 2.116852000  |
| 1                                | -1.891285000 | 1.584971000  | -2.951101000 | 1 | 4.146084000 | 0.744120000  | 2.045239000  |
| 6                                | 1.837981000  | -0.910889000 | -0.391333000 | 1 | 4.174493000 | 1.155545000  | 4.487613000  |
| 1                                | 1.123444000  | -1.610089000 | 0.044468000  | 1 | 4.459714000 | 2.867857000  | 4.210028000  |
| 1                                | 1.677997000  | -0.912570000 | -1.486900000 | 1 | 2.935525000 | 2.137481000  | 3.711976000  |
| 14                               | 4.011433000  | 1.175544000  | -1.199535000 | 1 | 6.293291000 | 0.525189000  | 3.193654000  |
| 14                               | -3.774189000 | -0.389135000 | 1.236479000  | 1 | 6.620432000 | 2.238376000  | 3.015962000  |
| <i>Si-inter-IM<sub>4,4</sub></i> |              |              |              | 1 | 6.575707000 | 1.208117000  | 1.595201000  |
| 7                                | 3.195937000  | -1.377574000 | -0.494919000 | 1 | 5.587793000 | 4.122360000  | 2.454138000  |
| 6                                | 2.448852000  | -1.564118000 | 0.638895000  | 1 | 5.267832000 | 5.964119000  | 0.876488000  |
| 6                                | 1.756820000  | -0.551124000 | 1.252410000  | 1 | 3.818740000 | 5.653581000  | -1.065475000 |
| 7                                | 2.840878000  | 1.296447000  | 0.095859000  | 1 | 1.881446000 | 2.592510000  | -1.779419000 |
| 6                                | 3.480734000  | 2.579518000  | 0.302371000  | 1 | 0.736311000 | 4.624687000  | -0.840995000 |
| 6                                | 4.330296000  | 2.761266000  | 1.411791000  | 1 | 0.594907000 | 4.518802000  | -2.596254000 |
| 6                                | 4.606197000  | 1.645166000  | 2.414869000  | 1 | 1.732476000 | 5.636189000  | -1.869654000 |
| 6                                | 4.000766000  | 1.975868000  | 3.796954000  | 1 | 3.910967000 | 2.851364000  | -3.165731000 |
| 6                                | 6.122660000  | 1.390284000  | 2.560366000  | 1 | 2.512925000 | 3.548217000  | -3.974752000 |
| 6                                | 4.948336000  | 3.984708000  | 1.605266000  | 1 | 3.684058000 | 4.600062000  | -3.190794000 |
| 6                                | 4.770801000  | 5.026840000  | 0.718396000  | 1 | 1.733083000 | -2.962651000 | 2.109256000  |
| 6                                | 3.953352000  | 4.847295000  | -0.372355000 | 1 | 2.060939000 | -3.697549000 | 0.517505000  |
| 6                                | 3.291059000  | 3.644444000  | -0.590002000 | 1 | 3.391755000 | -3.261472000 | 1.567420000  |
| 6                                | 2.373868000  | 3.550832000  | -1.805000000 | 1 | 7.019112000 | -3.893118000 | -0.951832000 |
| 6                                | 1.289808000  | 4.652493000  | -1.771854000 | 1 | 5.978818000 | -5.390533000 | -2.579427000 |
| 6                                | 3.177267000  | 3.643958000  | -3.120516000 | 1 | 3.674582000 | -5.001507000 | -3.290860000 |
| 6                                | 2.396706000  | -2.949548000 | 1.240947000  | 1 | 1.494941000 | -2.340694000 | -1.896826000 |
| 6                                | 3.957490000  | -2.477482000 | -1.061660000 | 1 | 0.088120000 | -4.139129000 | -2.847944000 |
| 6                                | 5.290940000  | -2.676780000 | -0.686908000 | 1 | 1.500158000 | -5.104009000 | -3.206130000 |
| 6                                | 5.998595000  | -3.735934000 | -1.238090000 | 1 | 1.061410000 | -4.800509000 | -1.534666000 |
|                                  |              |              |              | 1 | 1.014737000 | -2.281511000 | -4.332033000 |

|   |              |              |              |   |              |              |              |
|---|--------------|--------------|--------------|---|--------------|--------------|--------------|
| 1 | 2.580760000  | -1.564599000 | -3.965373000 | 6 | -4.355228000 | -3.775688000 | -2.159755000 |
| 1 | 2.492942000  | -3.186616000 | -4.641304000 | 1 | -4.390887000 | 0.518547000  | -2.044884000 |
| 1 | 5.290533000  | -1.001997000 | 0.613050000  | 1 | -4.381467000 | 0.697778000  | -4.511733000 |
| 1 | 7.628216000  | -0.282078000 | 0.169114000  | 1 | -4.729629000 | 2.415715000  | -4.405398000 |
| 1 | 6.701485000  | -0.421656000 | -1.320272000 | 1 | -3.190629000 | 1.798679000  | -3.831642000 |
| 1 | 7.860558000  | -1.672359000 | -0.879186000 | 1 | -6.508326000 | 0.138028000  | -3.217492000 |
| 1 | 7.046340000  | -1.768072000 | 2.170717000  | 1 | -6.910929000 | 1.839827000  | -3.124454000 |
| 1 | 5.809344000  | -3.008100000 | 2.023945000  | 1 | -6.815700000 | 0.881683000  | -1.651856000 |
| 1 | 7.343325000  | -3.189974000 | 1.187140000  | 1 | -5.936506000 | 3.824116000  | -2.785709000 |
| 1 | 1.593731000  | 0.083116000  | -1.677565000 | 1 | -5.634519000 | 5.812551000  | -1.402459000 |
| 7 | -3.082140000 | -1.369059000 | 0.719230000  | 1 | -4.185311000 | 5.736247000  | 0.560017000  |
| 6 | -1.896702000 | -1.387822000 | 0.206046000  | 1 | -2.204707000 | 2.763239000  | 1.600021000  |
| 6 | -1.923790000 | 1.080378000  | -0.563023000 | 1 | -1.046221000 | 4.752311000  | 2.373765000  |
| 7 | -3.119904000 | 1.320522000  | -0.138536000 | 1 | -2.178319000 | 5.805953000  | 1.547250000  |
| 6 | -3.811928000 | 2.575800000  | -0.506092000 | 1 | -1.092755000 | 4.779979000  | 0.621370000  |
| 6 | -4.651637000 | 2.591075000  | -1.619631000 | 1 | -2.996639000 | 3.764004000  | 3.704072000  |
| 6 | -4.873566000 | 1.368001000  | -2.504231000 | 1 | -4.157148000 | 4.750871000  | 2.826168000  |
| 6 | -4.250356000 | 1.584988000  | -3.901434000 | 1 | -4.342637000 | 3.004199000  | 2.865424000  |
| 6 | -6.376623000 | 1.038965000  | -2.628922000 | 1 | -0.130153000 | -2.519064000 | 0.381989000  |
| 6 | -5.295694000 | 3.779237000  | -1.929422000 | 1 | -1.612385000 | -3.531759000 | 0.255763000  |
| 6 | -5.125781000 | 4.903890000  | -1.149100000 | 1 | -0.936703000 | -2.674488000 | -1.159414000 |
| 6 | -4.305450000 | 4.859977000  | -0.042540000 | 1 | -5.858589000 | -4.998317000 | 0.127354000  |
| 6 | -3.628726000 | 3.698385000  | 0.303561000  | 1 | -5.409940000 | -5.832533000 | 2.377002000  |
| 6 | -2.744087000 | 3.695909000  | 1.549831000  | 1 | -3.905415000 | -4.612620000 | 3.863284000  |
| 6 | -1.701522000 | 4.833966000  | 1.514207000  | 1 | -2.104933000 | -1.490577000 | 2.927452000  |
| 6 | -3.620071000 | 3.809695000  | 2.818004000  | 1 | -0.711561000 | -2.686501000 | 4.541776000  |
| 6 | -1.117879000 | -2.625817000 | -0.081561000 | 1 | -1.761243000 | -4.089672000 | 4.479510000  |
| 6 | -3.728349000 | -2.621937000 | 1.165601000  | 1 | -0.818211000 | -3.638878000 | 3.068378000  |
| 6 | -4.600367000 | -3.291062000 | 0.308014000  | 1 | -2.687240000 | -1.248602000 | 5.298118000  |
| 6 | -5.192873000 | -4.457632000 | 0.767933000  | 1 | -4.137440000 | -1.149682000 | 4.308858000  |
| 6 | -4.940453000 | -4.930443000 | 2.038777000  | 1 | -3.778812000 | -2.622292000 | 5.199152000  |
| 6 | -4.088881000 | -4.241826000 | 2.875976000  | 1 | -4.442181000 | -1.837682000 | -1.243743000 |
| 6 | -3.464361000 | -3.074395000 | 2.460093000  | 1 | -6.634361000 | -2.213029000 | -2.281494000 |
| 6 | -2.538382000 | -2.340879000 | 3.429754000  | 1 | -6.823577000 | -1.910126000 | -0.558491000 |
| 6 | -1.385122000 | -3.251065000 | 3.906551000  | 1 | -6.960488000 | -3.546099000 | -1.192643000 |
| 6 | -3.340981000 | -1.806332000 | 4.636787000  | 1 | -4.549179000 | -3.396222000 | -3.157206000 |
| 6 | -4.913755000 | -2.798343000 | -1.101250000 | 1 | -3.285999000 | -3.910717000 | -2.047211000 |
| 6 | -6.433629000 | -2.605170000 | -1.291237000 | 1 | -4.829130000 | -4.745760000 | -2.069756000 |

|                                      |              |              |              |   |              |              |              |
|--------------------------------------|--------------|--------------|--------------|---|--------------|--------------|--------------|
| 1                                    | -3.163780000 | 0.579415000  | 2.210171000  | 6 | -3.383878000 | -5.317046000 | 2.527917000  |
| 6                                    | 1.857730000  | 0.890646000  | 1.002728000  | 6 | -2.644809000 | -4.373188000 | 3.208490000  |
| 6                                    | 1.059012000  | 1.757763000  | 1.693971000  | 6 | -2.385393000 | -3.128779000 | 2.653062000  |
| 1                                    | 1.164937000  | 2.829457000  | 1.584453000  | 6 | -1.604572000 | -2.100565000 | 3.470100000  |
| 1                                    | 0.426268000  | 1.390480000  | 2.497989000  | 6 | -0.294509000 | -2.683464000 | 4.042538000  |
| 6                                    | -1.172718000 | -0.111904000 | -0.067405000 | 6 | -2.491526000 | -1.565350000 | 4.617771000  |
| 1                                    | -0.296734000 | -0.292755000 | -0.700945000 | 6 | -4.318222000 | -3.496202000 | -0.661825000 |
| 1                                    | -0.718207000 | 0.226883000  | 0.887692000  | 6 | -5.856641000 | -3.527465000 | -0.520008000 |
| 6                                    | -1.129379000 | 1.975303000  | -1.444291000 | 6 | -3.862531000 | -4.497067000 | -1.746765000 |
| 1                                    | -0.216000000 | 2.226050000  | -0.888250000 | 1 | -0.442342000 | -0.107506000 | -1.249462000 |
| 1                                    | -0.794530000 | 1.413161000  | -2.322607000 | 1 | -4.750980000 | -0.329202000 | -1.881693000 |
| 1                                    | -1.660672000 | 2.876572000  | -1.734139000 | 1 | -5.139487000 | -0.438425000 | -4.323202000 |
| 14                                   | 3.132400000  | 0.256657000  | -1.423793000 | 1 | -5.844679000 | 1.169607000  | -4.301227000 |
| 14                                   | -4.142845000 | 0.222461000  | 1.106239000  | 1 | -4.139658000 | 0.958557000  | -3.948066000 |
|                                      |              |              |              | 1 | -6.885129000 | -1.260892000 | -2.658891000 |
|                                      |              |              |              | 1 | -7.627677000 | 0.324485000  | -2.634246000 |
|                                      |              |              |              | 1 | -7.116304000 | -0.424832000 | -1.127334000 |
|                                      |              |              |              | 1 | -7.074453000 | 2.474175000  | -2.632909000 |
|                                      |              |              |              | 1 | -7.052673000 | 4.620708000  | -1.471757000 |
|                                      |              |              |              | 1 | -5.379565000 | 5.066800000  | 0.249392000  |
|                                      |              |              |              | 1 | -2.644229000 | 2.732243000  | 1.182084000  |
|                                      |              |              |              | 1 | -2.225843000 | 4.871437000  | -0.075218000 |
|                                      |              |              |              | 1 | -1.906171000 | 4.994083000  | 1.646512000  |
|                                      |              |              |              | 1 | -3.373792000 | 5.681509000  | 0.979407000  |
|                                      |              |              |              | 1 | -4.586833000 | 2.579593000  | 2.738104000  |
|                                      |              |              |              | 1 | -3.374204000 | 3.711841000  | 3.319777000  |
|                                      |              |              |              | 1 | -4.848323000 | 4.308463000  | 2.567269000  |
|                                      |              |              |              | 1 | -2.632342000 | 2.595922000  | -2.192220000 |
|                                      |              |              |              | 1 | -1.759383000 | 1.221451000  | -2.928558000 |
|                                      |              |              |              | 1 | 0.220389000  | -2.152993000 | -0.847121000 |
|                                      |              |              |              | 1 | -0.316204000 | -3.024448000 | 0.603467000  |
|                                      |              |              |              | 1 | -1.202124000 | -3.232386000 | -0.898581000 |
|                                      |              |              |              | 1 | -4.482947000 | -5.755364000 | 0.768596000  |
|                                      |              |              |              | 1 | -3.570295000 | -6.274634000 | 2.971866000  |
|                                      |              |              |              | 1 | -2.268655000 | -4.602379000 | 4.183866000  |
|                                      |              |              |              | 1 | -1.347804000 | -1.268414000 | 2.833840000  |
|                                      |              |              |              | 1 | 0.276554000  | -1.894668000 | 4.519141000  |
|                                      |              |              |              | 1 | -0.493481000 | -3.445629000 | 4.785692000  |
| <b>Si-inter-TS<sub>A',A</sub>-II</b> |              |              |              |   |              |              |              |
| 7                                    | -2.621976000 | -1.535965000 | 0.781088000  |   |              |              |              |
| 6                                    | -1.557382000 | -1.358985000 | 0.045518000  |   |              |              |              |
| 6                                    | -1.218569000 | -0.030715000 | -0.483182000 |   |              |              |              |
| 6                                    | -2.286637000 | 0.890774000  | -0.901893000 |   |              |              |              |
| 7                                    | -3.422694000 | 0.942313000  | -0.274074000 |   |              |              |              |
| 6                                    | -4.433084000 | 1.962651000  | -0.620972000 |   |              |              |              |
| 6                                    | -5.398944000 | 1.679493000  | -1.587432000 |   |              |              |              |
| 6                                    | -5.468964000 | 0.345083000  | -2.323387000 |   |              |              |              |
| 6                                    | -5.122317000 | 0.521940000  | -3.818832000 |   |              |              |              |
| 6                                    | -6.867149000 | -0.292458000 | -2.172420000 |   |              |              |              |
| 6                                    | -6.331380000 | 2.662229000  | -1.885629000 |   |              |              |              |
| 6                                    | -6.321089000 | 3.875349000  | -1.230806000 |   |              |              |              |
| 6                                    | -5.373975000 | 4.126551000  | -0.261814000 |   |              |              |              |
| 6                                    | -4.410813000 | 3.181487000  | 0.062653000  |   |              |              |              |
| 6                                    | -3.396983000 | 3.504061000  | 1.159317000  |   |              |              |              |
| 6                                    | -2.684090000 | 4.849607000  | 0.905164000  |   |              |              |              |
| 6                                    | -4.099803000 | 3.525247000  | 2.535756000  |   |              |              |              |
| 6                                    | -1.903561000 | 1.810052000  | -2.016958000 |   |              |              |              |
| 6                                    | -0.649794000 | -2.506200000 | -0.297475000 |   |              |              |              |
| 6                                    | -2.893231000 | -2.858694000 | 1.378214000  |   |              |              |              |
| 6                                    | -3.670955000 | -3.789188000 | 0.688375000  |   |              |              |              |
| 6                                    | -3.894959000 | -5.022960000 | 1.282533000  |   |              |              |              |

|   |              |              |              |   |              |              |              |
|---|--------------|--------------|--------------|---|--------------|--------------|--------------|
| 1 | 0.316129000  | -3.120194000 | 3.262406000  | 6 | 4.075811000  | -2.819745000 | -2.166364000 |
| 1 | -1.958310000 | -0.804209000 | 5.176764000  | 6 | 2.670209000  | -2.818685000 | -2.758938000 |
| 1 | -3.404743000 | -1.130057000 | 4.232180000  | 6 | 2.043304000  | -4.229624000 | -2.793431000 |
| 1 | -2.756246000 | -2.368482000 | 5.295661000  | 6 | 2.700050000  | -2.211335000 | -4.179305000 |
| 1 | -4.033890000 | -2.502537000 | -0.974245000 | 6 | 6.236196000  | -0.885528000 | 0.344612000  |
| 1 | -6.323922000 | -3.301887000 | -1.471208000 | 6 | 7.248546000  | 0.091149000  | -0.295020000 |
| 1 | -6.185586000 | -2.799418000 | 0.210422000  | 6 | 6.853095000  | -1.577272000 | 1.579415000  |
| 1 | -6.190794000 | -4.508518000 | -0.205434000 | 1 | 1.085700000  | -1.001879000 | 1.761231000  |
| 1 | -4.300951000 | -4.231219000 | -2.702647000 | 1 | 3.753576000  | 1.111613000  | 2.062607000  |
| 1 | -2.785007000 | -4.501161000 | -1.856456000 | 1 | 3.504447000  | 1.387664000  | 4.509460000  |
| 1 | -4.180105000 | -5.503070000 | -1.501773000 | 1 | 3.464964000  | 3.135225000  | 4.323209000  |
| 1 | -0.601270000 | 0.626810000  | 0.344715000  | 1 | 2.159621000  | 2.152651000  | 3.668493000  |
| 1 | -2.819497000 | 0.543982000  | 2.081136000  | 1 | 5.802876000  | 1.252540000  | 3.380039000  |
| 1 | -0.930748000 | 2.245051000  | -1.771199000 | 1 | 5.800851000  | 3.003615000  | 3.292915000  |
| 7 | 3.462463000  | -1.010553000 | -0.598365000 | 1 | 6.065994000  | 2.058708000  | 1.836634000  |
| 6 | 2.672669000  | -1.396753000 | 0.435827000  | 1 | 4.462673000  | 4.681158000  | 2.717855000  |
| 6 | 1.725912000  | -0.566474000 | 1.000703000  | 1 | 3.913750000  | 6.504801000  | 1.183922000  |
| 6 | 1.583287000  | 0.860312000  | 0.817736000  | 1 | 2.711526000  | 6.024665000  | -0.886258000 |
| 7 | 2.515333000  | 1.507443000  | 0.031640000  | 1 | 1.440906000  | 2.692052000  | -1.858256000 |
| 6 | 2.866337000  | 2.881137000  | 0.342214000  | 1 | -0.065169000 | 4.407939000  | -2.768957000 |
| 6 | 3.577687000  | 3.159640000  | 1.524008000  | 1 | 0.798223000  | 5.672810000  | -1.921831000 |
| 6 | 3.993042000  | 2.064923000  | 2.502894000  | 1 | -0.105379000 | 4.482379000  | -1.005599000 |
| 6 | 3.226866000  | 2.194859000  | 3.837925000  | 1 | 2.102610000  | 3.809350000  | -3.971526000 |
| 6 | 5.514585000  | 2.100594000  | 2.766724000  | 1 | 2.993763000  | 5.022592000  | -3.062035000 |
| 6 | 3.929240000  | 4.467604000  | 1.813457000  | 1 | 3.523248000  | 3.341168000  | -3.045993000 |
| 6 | 3.621667000  | 5.499364000  | 0.951413000  | 1 | 0.399072000  | 2.577267000  | 1.348545000  |
| 6 | 2.942411000  | 5.224120000  | -0.212650000 | 1 | -0.014511000 | 1.007293000  | 2.236292000  |
| 6 | 2.544346000  | 3.930761000  | -0.528729000 | 1 | 2.612520000  | -3.546241000 | 0.210043000  |
| 6 | 1.767888000  | 3.720440000  | -1.824935000 | 1 | 3.843105000  | -2.972403000 | 1.319279000  |
| 6 | 0.517873000  | 4.627728000  | -1.879333000 | 1 | 2.144319000  | -2.951783000 | 1.819497000  |
| 6 | 2.659699000  | 3.990899000  | -3.056905000 | 1 | 7.702794000  | -2.768689000 | -0.888179000 |
| 6 | 0.500137000  | 1.500201000  | 1.415034000  | 1 | 7.046569000  | -4.359264000 | -2.623739000 |
| 6 | 2.820473000  | -2.797476000 | 0.977967000  | 1 | 4.751448000  | -4.369439000 | -3.463346000 |
| 6 | 4.447348000  | -1.930036000 | -1.149637000 | 1 | 2.053345000  | -2.182128000 | -2.146717000 |
| 6 | 5.768764000  | -1.897924000 | -0.693712000 | 1 | 1.019933000  | -4.170915000 | -3.152096000 |
| 6 | 6.688644000  | -2.786025000 | -1.233498000 | 1 | 2.588312000  | -4.885865000 | -3.460928000 |
| 6 | 6.322864000  | -3.681352000 | -2.215262000 | 1 | 2.036244000  | -4.681123000 | -1.807715000 |
| 6 | 5.025408000  | -3.688570000 | -2.682599000 | 1 | 1.697844000  | -2.174052000 | -4.596108000 |

|                                   |              |              |              |   |              |              |              |
|-----------------------------------|--------------|--------------|--------------|---|--------------|--------------|--------------|
| 1                                 | 3.098337000  | -1.205484000 | -4.149478000 | 6 | 5.087097000  | 0.909090000  | -1.320909000 |
| 1                                 | 3.321837000  | -2.810125000 | -4.835263000 | 6 | 4.902234000  | -0.409828000 | -0.966034000 |
| 1                                 | 5.378608000  | -0.314952000 | 0.662091000  | 6 | 3.723926000  | -0.832802000 | -0.367602000 |
| 1                                 | 7.565074000  | 0.833191000  | 0.429932000  | 6 | 3.565983000  | -2.311573000 | -0.016593000 |
| 1                                 | 6.794494000  | 0.601262000  | -1.135225000 | 6 | 4.796551000  | -2.876177000 | 0.726851000  |
| 1                                 | 8.127913000  | -0.439085000 | -0.642957000 | 6 | 3.296814000  | -3.129567000 | -1.300157000 |
| 1                                 | 7.129921000  | -0.835567000 | 2.320786000  | 6 | 1.803014000  | 2.500738000  | -0.295243000 |
| 1                                 | 6.148356000  | -2.265291000 | 2.033017000  | 6 | 1.380135000  | 3.120506000  | -1.645845000 |
| 1                                 | 7.744627000  | -2.132391000 | 1.311459000  | 6 | 2.276892000  | 3.604946000  | 0.675620000  |
| 1                                 | 1.745065000  | 0.168996000  | -1.909032000 | 1 | 0.052355000  | -0.313600000 | 3.530267000  |
| 14                                | -3.891884000 | -0.156849000 | 1.267663000  | 1 | -1.500289000 | 2.128986000  | 0.427142000  |
| 14                                | 3.174075000  | 0.627714000  | -1.489283000 | 1 | -4.195998000 | 3.300829000  | 1.222957000  |
| <i>Si-intra-TS<sub>1,2'</sub></i> |              |              |              | 1 | -3.185451000 | 2.269982000  | 2.231739000  |
| 1                                 | 1.036344000  | -1.532970000 | 0.208505000  | 1 | -2.630050000 | 3.877415000  | 1.778572000  |
| 1                                 | 0.319203000  | -2.131541000 | -0.208575000 | 1 | -1.838259000 | 4.323519000  | -0.614739000 |
| 7                                 | 1.448544000  | -0.311781000 | 0.462372000  | 1 | -3.429383000 | 3.861651000  | -1.181401000 |
| 6                                 | 1.273448000  | -0.181228000 | 1.863031000  | 1 | -2.004933000 | 3.075108000  | -1.845394000 |
| 6                                 | 0.065136000  | -0.321304000 | 2.445718000  | 1 | -4.944509000 | 2.261301000  | -0.962074000 |
| 6                                 | -1.265295000 | -0.421309000 | 1.835172000  | 1 | -6.193374000 | 0.290909000  | -1.684364000 |
| 7                                 | -1.358351000 | -0.255901000 | 0.434468000  | 1 | -5.234634000 | -1.938017000 | -1.402751000 |
| 6                                 | -2.699615000 | -0.112960000 | -0.134292000 | 1 | -1.950021000 | -2.599104000 | 0.210615000  |
| 6                                 | -3.247030000 | 1.166388000  | -0.286082000 | 1 | -3.395713000 | -4.519846000 | 0.638891000  |
| 6                                 | -2.506989000 | 2.417682000  | 0.172146000  | 1 | -4.778339000 | -3.690229000 | -0.052190000 |
| 6                                 | -3.175316000 | 3.003235000  | 1.436233000  | 1 | -4.048782000 | -3.095125000 | 1.435116000  |
| 6                                 | -2.442596000 | 3.483787000  | -0.942488000 | 1 | -2.156417000 | -4.300727000 | -1.577201000 |
| 6                                 | -4.510797000 | 1.289211000  | -0.843370000 | 1 | -3.490143000 | -3.406552000 | -2.293831000 |
| 6                                 | -5.219929000 | 0.177506000  | -1.249046000 | 1 | -1.876540000 | -2.713921000 | -2.283431000 |
| 6                                 | -4.676831000 | -1.078861000 | -1.089349000 | 1 | -3.346355000 | -0.637736000 | 2.246756000  |
| 6                                 | -3.420336000 | -1.247446000 | -0.523744000 | 1 | -2.195051000 | -0.690855000 | 3.703122000  |
| 6                                 | -2.872416000 | -2.660978000 | -0.343250000 | 1 | 2.242420000  | 0.047874000  | 3.751932000  |
| 6                                 | -3.841479000 | -3.544626000 | 0.472154000  | 1 | 3.234040000  | -0.782430000 | 2.536849000  |
| 6                                 | -2.579271000 | -3.310726000 | -1.714082000 | 1 | 3.012962000  | 0.957198000  | 2.440744000  |
| 6                                 | -2.338301000 | -0.597590000 | 2.633401000  | 1 | 4.235950000  | 2.851302000  | -1.368803000 |
| 6                                 | 2.510922000  | 0.021397000  | 2.694677000  | 1 | 6.005756000  | 1.218223000  | -1.778978000 |
| 6                                 | 2.713351000  | 0.109046000  | -0.142593000 | 1 | 5.681858000  | -1.118213000 | -1.156258000 |
| 6                                 | 2.887130000  | 1.447969000  | -0.506051000 | 1 | 2.719756000  | -2.428719000 | 0.643548000  |
| 6                                 | 4.086630000  | 1.828368000  | -1.088973000 | 1 | 4.592289000  | -3.892496000 | 1.045803000  |
|                                   |              |              |              | 1 | 5.669670000  | -2.899941000 | 0.087077000  |

|    |              |              |              |   |              |              |              |
|----|--------------|--------------|--------------|---|--------------|--------------|--------------|
| 1  | 5.029837000  | -2.282400000 | 1.602805000  | 6 | 5.040073000  | 1.396174000  | -0.775422000 |
| 1  | 3.144470000  | -4.175737000 | -1.056501000 | 6 | 4.965309000  | 0.029056000  | -0.941366000 |
| 1  | 2.416215000  | -2.765070000 | -1.814451000 | 6 | 3.826348000  | -0.675424000 | -0.584598000 |
| 1  | 4.140940000  | -3.052624000 | -1.975649000 | 6 | 3.786217000  | -2.188148000 | -0.832873000 |
| 1  | 0.939868000  | 2.025912000  | 0.144895000  | 6 | 5.153492000  | -2.876219000 | -0.630596000 |
| 1  | 0.584064000  | 3.839374000  | -1.492114000 | 6 | 3.261771000  | -2.460400000 | -2.262093000 |
| 1  | 1.026593000  | 2.354210000  | -2.324643000 | 6 | 1.613554000  | 2.255216000  | 0.597497000  |
| 1  | 2.212545000  | 3.634512000  | -2.111244000 | 6 | 1.290486000  | 3.416000000  | -0.368407000 |
| 1  | 1.477241000  | 4.318594000  | 0.843214000  | 6 | 1.912360000  | 2.806443000  | 2.008747000  |
| 1  | 2.564439000  | 3.186271000  | 1.632189000  | 1 | 0.035057000  | -0.626846000 | 3.407442000  |
| 1  | 3.126490000  | 4.139209000  | 0.267059000  | 1 | -1.286055000 | 2.122402000  | -0.323550000 |
| 14 | -0.081485000 | -0.519866000 | -0.771349000 | 1 | -3.815630000 | 3.790187000  | 0.001859000  |

*Si-intra-IM<sub>1,2</sub>*

|   |              |              |              |   |              |              |              |
|---|--------------|--------------|--------------|---|--------------|--------------|--------------|
| 1 | 1.693605000  | -1.673132000 | 0.108067000  | 1 | -2.184993000 | 4.334438000  | 0.363600000  |
| 1 | -0.122540000 | -2.228093000 | -0.544307000 | 1 | -1.428157000 | 3.890330000  | -2.041997000 |
| 7 | 1.517398000  | -0.700121000 | 0.345185000  | 1 | -3.048710000 | 3.377618000  | -2.470689000 |
| 6 | 1.291111000  | -0.738879000 | 1.793483000  | 1 | -1.684222000 | 2.306568000  | -2.766158000 |
| 6 | 0.079918000  | -0.539970000 | 2.325506000  | 1 | -4.765193000 | 2.211565000  | -1.608869000 |
| 6 | -1.221393000 | -0.206467000 | 1.720394000  | 1 | -6.233176000 | 0.259467000  | -1.684453000 |
| 7 | -1.335498000 | -0.177694000 | 0.331302000  | 1 | -5.448456000 | -1.891430000 | -0.829965000 |
| 6 | -2.686825000 | -0.050189000 | -0.215397000 | 1 | -2.098591000 | -2.450501000 | 0.665337000  |
| 6 | -3.133199000 | 1.180102000  | -0.708429000 | 1 | -3.665401000 | -3.982842000 | 1.780212000  |
| 6 | -2.257504000 | 2.423719000  | -0.672972000 | 1 | -5.034908000 | -3.173328000 | 1.038605000  |
| 6 | -2.830864000 | 3.462769000  | 0.315769000  | 1 | -4.037084000 | -2.318147000 | 2.210115000  |
| 6 | -2.096836000 | 3.036867000  | -2.080582000 | 1 | -2.692244000 | -4.528695000 | -0.513264000 |
| 6 | -4.415264000 | 1.271577000  | -1.232376000 | 1 | -4.040289000 | -3.724873000 | -1.304036000 |
| 6 | -5.245656000 | 0.173016000  | -1.275169000 | 1 | -2.390474000 | -3.242694000 | -1.673720000 |
| 6 | -4.800517000 | -1.038990000 | -0.790983000 | 1 | -3.213169000 | 0.355798000  | 2.243121000  |
| 6 | -3.527745000 | -1.173326000 | -0.256933000 | 1 | -2.036976000 | 0.065810000  | 3.649464000  |
| 6 | -3.093291000 | -2.541333000 | 0.264323000  | 1 | 2.211562000  | -1.153330000 | 3.679325000  |
| 6 | -4.021755000 | -3.031872000 | 1.396467000  | 1 | 2.883767000  | -2.084037000 | 2.332946000  |
| 6 | -3.052703000 | -3.574147000 | -0.883463000 | 1 | 3.299442000  | -0.380054000 | 2.509195000  |
| 6 | -2.222171000 | 0.089585000  | 2.582865000  | 1 | 4.023858000  | 3.145747000  | -0.149959000 |
| 6 | 2.489779000  | -1.103733000 | 2.625227000  | 1 | 5.934589000  | 1.920709000  | -1.046572000 |
| 6 | 2.740826000  | 0.045771000  | -0.067237000 | 1 | 5.804998000  | -0.493266000 | -1.347282000 |
| 6 | 2.787533000  | 1.429149000  | 0.079446000  | 1 | 3.117978000  | -2.663674000 | -0.125038000 |
| 6 | 3.961660000  | 2.084214000  | -0.269145000 | 1 | 5.018858000  | -3.951249000 | -0.670713000 |
|   |              |              |              | 1 | 5.852779000  | -2.606116000 | -1.411424000 |

|    |              |              |              |   |              |              |              |
|----|--------------|--------------|--------------|---|--------------|--------------|--------------|
| 1  | 5.584828000  | -2.618488000 | 0.329359000  | 6 | -4.963725000 | -0.279304000 | 1.203707000  |
| 1  | 3.199106000  | -3.527505000 | -2.446168000 | 6 | -4.392145000 | -1.289619000 | 0.463516000  |
| 1  | 2.281728000  | -2.025931000 | -2.414693000 | 6 | -3.185387000 | -1.110469000 | -0.192666000 |
| 1  | 3.939081000  | -2.022343000 | -2.985615000 | 6 | -2.666419000 | -2.292678000 | -1.012025000 |
| 1  | 0.740802000  | 1.627473000  | 0.654018000  | 6 | -3.717217000 | -2.781520000 | -2.036069000 |
| 1  | 0.413496000  | 3.946508000  | -0.017379000 | 6 | -2.245091000 | -3.455653000 | -0.087880000 |
| 1  | 1.091317000  | 3.041510000  | -1.364412000 | 6 | -2.606445000 | 2.607717000  | 0.666021000  |
| 1  | 2.107128000  | 4.125381000  | -0.420323000 | 6 | -2.274982000 | 3.038841000  | 2.109911000  |
| 1  | 1.058658000  | 3.365710000  | 2.375837000  | 6 | -3.615277000 | 3.589654000  | 0.026750000  |
| 1  | 2.117131000  | 2.004450000  | 2.706010000  | 1 | 0.514557000  | -0.054569000 | -3.553967000 |
| 1  | 2.769873000  | 3.469418000  | 1.983935000  | 1 | 3.283478000  | 1.319879000  | -1.835408000 |
| 14 | -0.134718000 | -0.735086000 | -0.935183000 | 1 | 5.520344000  | -0.697931000 | -2.291631000 |

*Si-intra-TS<sub>2,4</sub>*

|   |              |              |              |   |              |              |              |
|---|--------------|--------------|--------------|---|--------------|--------------|--------------|
| 1 | -0.352108000 | -0.993622000 | -0.582997000 | 1 | 4.701399000  | 0.210773000  | -3.557759000 |
| 1 | 0.343472000  | 1.519213000  | 1.172109000  | 1 | 5.310418000  | 2.473888000  | -2.490410000 |
| 7 | -1.163811000 | 0.255742000  | -0.676551000 | 1 | 6.281809000  | 1.573058000  | -1.345860000 |
| 6 | -1.032396000 | 0.300538000  | -2.093584000 | 1 | 5.076189000  | 2.715881000  | -0.764688000 |
| 6 | 0.192773000  | -0.067878000 | -2.520961000 | 1 | 6.092208000  | 0.115586000  | 0.249693000  |
| 6 | 1.063245000  | -0.585436000 | -1.416646000 | 1 | 5.802550000  | -0.909921000 | 2.450899000  |
| 7 | 1.631555000  | 0.310354000  | -0.595068000 | 1 | 3.562758000  | -1.352005000 | 3.302605000  |
| 6 | 2.719700000  | -0.054687000 | 0.312278000  | 1 | 0.410994000  | -0.674553000 | 1.506271000  |
| 6 | 4.008368000  | 0.235202000  | -0.166549000 | 1 | 0.037070000  | -2.578737000 | 2.991348000  |
| 6 | 4.216797000  | 0.870157000  | -1.539277000 | 1 | 1.733028000  | -2.641942000 | 3.427764000  |
| 6 | 4.586304000  | -0.221775000 | -2.568842000 | 1 | 1.236453000  | -3.068451000 | 1.803759000  |
| 6 | 5.292473000  | 1.976304000  | -1.526434000 | 1 | -0.026857000 | -0.177492000 | 3.859960000  |
| 6 | 5.105897000  | -0.088016000 | 0.612432000  | 1 | 1.686672000  | -0.276076000 | 4.237901000  |
| 6 | 4.945232000  | -0.665735000 | 1.854968000  | 1 | 1.085786000  | 1.022589000  | 3.216388000  |
| 6 | 3.679210000  | -0.917908000 | 2.330667000  | 1 | 1.220599000  | -2.311164000 | -0.147068000 |
| 6 | 2.545744000  | -0.621595000 | 1.580875000  | 1 | 0.357356000  | -2.569935000 | -1.760822000 |
| 6 | 1.185017000  | -0.911827000 | 2.216115000  | 1 | -2.251385000 | 1.922369000  | -2.706771000 |
| 6 | 1.043530000  | -2.395764000 | 2.629635000  | 1 | -1.851945000 | 0.776353000  | -4.007248000 |
| 6 | 0.971645000  | -0.023257000 | 3.463612000  | 1 | -3.069576000 | 0.360049000  | -2.773442000 |
| 6 | 0.739973000  | -1.882771000 | -1.014526000 | 1 | -4.797737000 | 1.743006000  | 1.797529000  |
| 6 | -2.117646000 | 0.862663000  | -2.951935000 | 1 | -5.891233000 | -0.438585000 | 1.717045000  |
| 6 | -2.510315000 | 0.123798000  | -0.086047000 | 1 | -4.889405000 | -2.235410000 | 0.395107000  |
| 6 | -3.131742000 | 1.176784000  | 0.605527000  | 1 | -1.808538000 | -1.980315000 | -1.577563000 |
| 6 | -4.339482000 | 0.942927000  | 1.253394000  | 1 | -3.284240000 | -3.554697000 | -2.662455000 |
|   |              |              |              | 1 | -4.586157000 | -3.200060000 | -1.544391000 |

|                                  |              |              |              |   |              |              |              |
|----------------------------------|--------------|--------------|--------------|---|--------------|--------------|--------------|
| 1                                | -4.045347000 | -1.969320000 | -2.673625000 | 1 | -5.342652000 | -1.592686000 | -1.508928000 |
| 1                                | -1.829052000 | -4.270972000 | -0.671470000 | 1 | -4.702648000 | 2.554412000  | -0.953614000 |
| 1                                | -1.502051000 | -3.130733000 | 0.629035000  | 1 | -6.098744000 | 0.717595000  | -1.754383000 |
| 1                                | -3.101015000 | -3.833352000 | 0.458995000  | 6 | -2.289953000 | 2.471791000  | 0.240568000  |
| 1                                | -1.710259000 | 2.683011000  | 0.078663000  | 6 | -2.937390000 | 3.077533000  | 1.505983000  |
| 1                                | -1.834378000 | 4.030326000  | 2.107314000  | 6 | -2.108356000 | 3.558737000  | -0.840531000 |
| 1                                | -1.572291000 | 2.352965000  | 2.563714000  | 1 | -1.316732000 | 2.094104000  | 0.510922000  |
| 1                                | -3.171034000 | 3.070036000  | 2.719123000  | 1 | -3.028262000 | 2.325921000  | 2.278601000  |
| 1                                | -3.187811000 | 4.586329000  | -0.000030000 | 1 | -2.328726000 | 3.892492000  | 1.885332000  |
| 1                                | -3.853104000 | 3.291082000  | -0.987540000 | 1 | -3.923730000 | 3.466332000  | 1.278323000  |
| 1                                | -4.537168000 | 3.632623000  | 0.593920000  | 1 | -1.689048000 | 3.139736000  | -1.747517000 |
| 14                               | 0.344015000  | 1.719466000  | -0.323111000 | 1 | -3.052771000 | 4.029041000  | -1.086457000 |
| <i>Si-intra-TS<sub>1,1</sub></i> |              |              |              | 1 | -1.439484000 | 4.331642000  | -0.476132000 |
| 6                                | 1.234865000  | -0.204485000 | 1.851938000  | 6 | -3.073515000 | -2.539848000 | -0.419210000 |
| 6                                | 0.036396000  | -0.391044000 | 2.456710000  | 6 | -2.841235000 | -3.192202000 | -1.800723000 |
| 6                                | -1.307011000 | -0.453091000 | 1.868222000  | 6 | -4.116043000 | -3.347711000 | 0.383982000  |
| 6                                | -2.393202000 | -0.578737000 | 2.656207000  | 1 | -2.149549000 | -2.566875000 | 0.135505000  |
| 7                                | 1.392082000  | -0.200723000 | 0.454030000  | 1 | -2.113630000 | -2.633542000 | -2.378063000 |
| 7                                | -1.391336000 | -0.294681000 | 0.459597000  | 1 | -2.481006000 | -4.208842000 | -1.680376000 |
| 14                               | 0.004131000  | -0.646962000 | -0.513499000 | 1 | -3.764547000 | -3.225214000 | -2.367564000 |
| 1                                | 0.046380000  | -0.430034000 | 3.539910000  | 1 | -4.273701000 | -2.902555000 | 1.358072000  |
| 1                                | -3.396659000 | -0.594506000 | 2.255717000  | 1 | -5.065527000 | -3.391353000 | -0.136218000 |
| 6                                | 2.692160000  | 0.064897000  | -0.152741000 | 1 | -3.763393000 | -4.364065000 | 0.526082000  |
| 6                                | 3.586172000  | -0.991262000 | -0.366391000 | 6 | 2.064718000  | 2.538630000  | -0.353195000 |
| 6                                | 3.026254000  | 1.368868000  | -0.531679000 | 6 | 1.651651000  | 3.102393000  | -1.731447000 |
| 6                                | 4.813143000  | -0.718479000 | -0.952746000 | 6 | 2.680360000  | 3.652877000  | 0.520701000  |
| 6                                | 4.265206000  | 1.598246000  | -1.113156000 | 1 | 1.179549000  | 2.176290000  | 0.145059000  |
| 6                                | 5.154328000  | 0.565824000  | -1.321334000 | 1 | 1.187519000  | 2.332609000  | -2.337363000 |
| 1                                | 5.505396000  | -1.517162000 | -1.126056000 | 1 | 0.946175000  | 3.916089000  | -1.609123000 |
| 1                                | 4.533924000  | 2.592183000  | -1.408680000 | 1 | 2.515542000  | 3.479789000  | -2.265609000 |
| 1                                | 6.107007000  | 0.759939000  | -1.773377000 | 1 | 2.975633000  | 3.267689000  | 1.489301000  |
| 6                                | -2.691578000 | -0.024666000 | -0.141761000 | 1 | 3.552915000  | 4.084438000  | 0.044968000  |
| 6                                | -3.496038000 | -1.082259000 | -0.575815000 | 1 | 1.955233000  | 4.444863000  | 0.675667000  |
| 6                                | -3.122462000 | 1.300936000  | -0.269508000 | 6 | 3.239205000  | -2.432837000 | -0.004516000 |
| 6                                | -4.720101000 | -0.792398000 | -1.163081000 | 6 | 4.323196000  | -3.090882000 | 0.877233000  |
| 6                                | -4.356752000 | 1.545897000  | -0.851879000 | 6 | 3.033689000  | -3.266543000 | -1.290264000 |
| 6                                | -5.149033000 | 0.509772000  | -1.301901000 | 1 | 2.313634000  | -2.431823000 | 0.549244000  |
|                                  |              |              |              | 1 | 4.502468000  | -2.512145000 | 1.774973000  |



|                     |              |              |              |   |              |              |              |
|---------------------|--------------|--------------|--------------|---|--------------|--------------|--------------|
| 1                   | 4.002024000  | -4.084397000 | 1.171408000  | 1 | -4.858574000 | 2.258363000  | -1.380711000 |
| 1                   | 5.260041000  | -3.187971000 | 0.342190000  | 1 | -6.068212000 | 0.214392000  | -1.952048000 |
| 1                   | 2.280729000  | -2.819319000 | -1.928103000 | 6 | -2.499688000 | 2.547899000  | -0.109608000 |
| 1                   | 3.956933000  | -3.326578000 | -1.854902000 | 6 | -3.300505000 | 3.326411000  | 0.957400000  |
| 1                   | 2.719725000  | -4.274242000 | -1.039161000 | 6 | -2.257191000 | 3.430669000  | -1.353218000 |
| 1                   | 0.096859000  | -1.964183000 | -1.212760000 | 1 | -1.542885000 | 2.292152000  | 0.316177000  |
| 6                   | 2.472123000  | 0.022473000  | 2.676692000  | 1 | -3.429950000 | 2.722146000  | 1.845640000  |
| 1                   | 2.219539000  | -0.013904000 | 3.737134000  | 1 | -2.771592000 | 4.233637000  | 1.232076000  |
| 1                   | 3.238712000  | -0.725876000 | 2.471132000  | 1 | -4.277086000 | 3.604765000  | 0.577788000  |
| 1                   | 2.911187000  | 0.998970000  | 2.457911000  | 1 | -1.706392000 | 2.887941000  | -2.111948000 |
| 1                   | -2.265391000 | -0.648643000 | 3.729404000  | 1 | -3.193852000 | 3.765039000  | -1.783466000 |
| 1                   | 0.101231000  | -2.297501000 | -0.057027000 | 1 | -1.684267000 | 4.309713000  | -1.076116000 |
|                     |              |              |              | 6 | -2.840621000 | -2.558975000 | -0.092779000 |
|                     |              |              |              | 6 | -2.680272000 | -3.454786000 | -1.340652000 |
| Si-P <sub>1,1</sub> |              |              |              | 6 | -3.760336000 | -3.240850000 | 0.943973000  |
| 6                   | 1.226042000  | -0.133630000 | 1.899091000  | 1 | -1.870673000 | -2.430670000 | 0.359845000  |
| 6                   | 0.020273000  | -0.143844000 | 2.510504000  | 1 | -2.040742000 | -2.982862000 | -2.076691000 |
| 6                   | -1.316339000 | -0.095799000 | 1.914788000  | 1 | -2.237077000 | -4.404687000 | -1.059812000 |
| 6                   | -2.411930000 | -0.055454000 | 2.701749000  | 1 | -3.640448000 | -3.656611000 | -1.800722000 |
| 7                   | 1.373271000  | -0.110000000 | 0.501657000  | 1 | -3.838972000 | -2.633271000 | 1.835798000  |
| 7                   | -1.386510000 | -0.082719000 | 0.503845000  | 1 | -4.753022000 | -3.395310000 | 0.536805000  |
| 1                   | 0.030018000  | -0.173597000 | 3.594869000  | 1 | -3.353651000 | -4.208048000 | 1.221898000  |
| 1                   | -3.413670000 | -0.015527000 | 2.298099000  | 6 | 2.465315000  | 2.548738000  | -0.044522000 |
| 6                   | 2.670836000  | -0.001121000 | -0.150760000 | 6 | 2.170588000  | 3.437952000  | -1.272561000 |
| 6                   | 3.361935000  | -1.161054000 | -0.521487000 | 6 | 3.289050000  | 3.336894000  | 0.998341000  |
| 6                   | 3.188386000  | 1.266426000  | -0.446061000 | 1 | 1.524576000  | 2.277212000  | 0.407237000  |
| 6                   | 4.573397000  | -1.029978000 | -1.185448000 | 1 | 1.599443000  | 2.894336000  | -2.014621000 |
| 6                   | 4.403350000  | 1.351154000  | -1.109564000 | 1 | 1.598169000  | 4.308400000  | -0.969363000 |
| 6                   | 5.091577000  | 0.213876000  | -1.478130000 | 1 | 3.089019000  | 3.783972000  | -1.731859000 |
| 1                   | 5.115242000  | -1.907823000 | -1.474091000 | 1 | 3.491741000  | 2.730281000  | 1.872405000  |
| 1                   | 4.813969000  | 2.313381000  | -1.339837000 | 1 | 4.235800000  | 3.655731000  | 0.577949000  |
| 1                   | 6.029110000  | 0.297121000  | -1.991714000 | 1 | 2.743371000  | 4.220078000  | 1.313597000  |
| 6                   | -2.686094000 | -0.003743000 | -0.147240000 | 6 | 2.834300000  | -2.556982000 | -0.202149000 |
| 6                   | -3.376333000 | -1.179233000 | -0.464389000 | 6 | 3.786605000  | -3.298533000 | 0.762620000  |
| 6                   | -3.215121000 | 1.250638000  | -0.474131000 | 6 | 2.631680000  | -3.386932000 | -1.489116000 |
| 6                   | -4.596357000 | -1.077218000 | -1.117808000 | 1 | 1.877831000  | -2.451330000 | 0.284445000  |
| 6                   | -4.438089000 | 1.306563000  | -1.125913000 | 1 | 3.932016000  | -2.735392000 | 1.676193000  |
| 6                   | -5.123715000 | 0.153467000  | -1.447869000 | 1 | 3.372796000  | -4.267793000 | 1.020534000  |
| 1                   | -5.138514000 | -1.967058000 | -1.366673000 |   |              |              |              |

|                                    |              |              |              |   |              |              |              |
|------------------------------------|--------------|--------------|--------------|---|--------------|--------------|--------------|
| 1                                  | 4.754734000  | -3.456459000 | 0.301899000  | 1 | 0.493828000  | 1.319438000  | -1.173908000 |
| 1                                  | 1.967470000  | -2.878070000 | -2.176330000 | 1 | -3.034509000 | -3.184299000 | -1.278948000 |
| 1                                  | 3.576292000  | -3.561234000 | -1.990710000 | 1 | -3.310284000 | -2.303073000 | -2.773133000 |
| 1                                  | 2.198044000  | -4.350726000 | -1.243723000 | 1 | -1.644992000 | -2.596409000 | -2.213120000 |
| 1                                  | 0.004092000  | 0.916522000  | -1.527459000 | 1 | -7.590840000 | -1.437712000 | -3.164695000 |
| 6                                  | 2.477427000  | -0.151892000 | 2.748406000  | 1 | -8.423686000 | -3.152327000 | -1.639358000 |
| 1                                  | 2.503223000  | 0.726069000  | 3.399112000  | 1 | -7.159635000 | -3.729839000 | 0.366641000  |
| 1                                  | 2.484638000  | -1.039883000 | 3.385952000  | 6 | -2.876043000 | 3.879408000  | -1.082232000 |
| 1                                  | 3.383828000  | -0.155232000 | 2.147697000  | 1 | -2.874083000 | 2.866167000  | -1.453480000 |
| 1                                  | -2.290293000 | -0.059269000 | 3.777536000  | 6 | -1.740457000 | 1.411095000  | 3.272626000  |
| 1                                  | -0.013980000 | -1.459038000 | -1.320530000 | 1 | -1.687786000 | 0.580460000  | 2.585368000  |
| 14                                 | -0.016994000 | -0.194021000 | -0.558174000 | 6 | -1.831954000 | 4.674497000  | -1.896425000 |
| <i>Si-inter-TS<sub>1,4</sub>-I</i> |              |              |              | 1 | -1.820871000 | 5.716369000  | -1.600305000 |
| 7                                  | -3.872906000 | -0.641334000 | -0.576378000 | 1 | -0.840167000 | 4.265238000  | -1.753210000 |
| 6                                  | -2.670380000 | -1.074107000 | -1.129128000 | 1 | -2.074206000 | 4.627697000  | -2.952904000 |
| 6                                  | -1.520267000 | -0.354445000 | -0.996563000 | 6 | -4.288864000 | 4.468193000  | -1.294764000 |
| 6                                  | -1.362720000 | 0.886318000  | -0.291618000 | 1 | -4.554547000 | 4.432494000  | -2.345972000 |
| 7                                  | -2.445234000 | 1.382133000  | 0.418277000  | 1 | -5.030050000 | 3.912266000  | -0.732323000 |
| 6                                  | -2.298621000 | 2.674667000  | 1.113029000  | 1 | -4.325793000 | 5.501587000  | -0.972173000 |
| 6                                  | -2.522524000 | 3.858851000  | 0.403242000  | 6 | -0.404576000 | 1.463836000  | 4.044148000  |
| 6                                  | -2.422321000 | 5.062035000  | 1.085153000  | 1 | -0.405532000 | 2.261100000  | 4.777215000  |
| 6                                  | -2.116267000 | 5.092377000  | 2.429905000  | 1 | -0.248037000 | 0.529479000  | 4.569346000  |
| 6                                  | -1.900064000 | 3.916009000  | 3.114886000  | 1 | 0.427106000  | 1.612898000  | 3.368042000  |
| 6                                  | -1.980402000 | 2.688119000  | 2.472220000  | 6 | -2.915558000 | 1.166613000  | 4.247081000  |
| 6                                  | -0.103597000 | 1.504693000  | -0.285585000 | 1 | -3.858884000 | 1.106903000  | 3.715980000  |
| 6                                  | -2.662678000 | -2.364265000 | -1.896245000 | 1 | -2.765203000 | 0.239158000  | 4.789564000  |
| 6                                  | -5.112792000 | -1.371708000 | -0.886665000 | 1 | -2.985158000 | 1.974060000  | 4.966557000  |
| 6                                  | -5.830846000 | -1.028612000 | -2.037153000 | 6 | -5.364888000 | 0.063183000  | -2.998251000 |
| 6                                  | -7.023932000 | -1.687773000 | -2.291396000 | 1 | -4.373523000 | 0.377656000  | -2.710101000 |
| 6                                  | -7.497100000 | -2.655601000 | -1.430119000 | 6 | -6.305930000 | 1.285918000  | -2.905762000 |
| 6                                  | -6.781083000 | -2.980953000 | -0.298278000 | 1 | -7.309890000 | 1.015647000  | -3.210538000 |
| 6                                  | -5.579718000 | -2.350667000 | -0.005474000 | 1 | -6.352478000 | 1.664034000  | -1.891258000 |
| 1                                  | -0.617898000 | -0.757388000 | -1.447596000 | 1 | -5.954729000 | 2.081128000  | -3.554709000 |
| 1                                  | -2.588580000 | 5.981370000  | 0.561800000  | 6 | -5.290325000 | -0.443378000 | -4.455256000 |
| 1                                  | -2.047448000 | 6.031321000  | 2.942500000  | 1 | -4.888467000 | 0.335467000  | -5.094156000 |
| 1                                  | -1.665474000 | 3.950677000  | 4.158599000  | 1 | -4.649364000 | -1.313040000 | -4.534729000 |
| 1                                  | -0.023133000 | 2.496166000  | 0.139991000  | 1 | -6.271633000 | -0.708112000 | -4.828907000 |
|                                    |              |              |              | 6 | -4.832713000 | -2.732206000 | 1.269686000  |

|   |              |              |              |   |              |              |              |
|---|--------------|--------------|--------------|---|--------------|--------------|--------------|
| 1 | -3.870945000 | -2.243665000 | 1.261711000  | 1 | 7.147156000  | 4.658162000  | -0.320516000 |
| 6 | -5.613025000 | -2.249072000 | 2.513484000  | 1 | 4.996753000  | 4.938092000  | 0.806166000  |
| 1 | -5.061198000 | -2.485832000 | 3.416939000  | 6 | 2.913138000  | 3.277223000  | 0.948323000  |
| 1 | -5.775905000 | -1.178357000 | 2.479443000  | 1 | 2.270833000  | 2.440155000  | 0.744416000  |
| 1 | -6.579656000 | -2.735903000 | 2.567202000  | 6 | 2.210174000  | 4.557646000  | 0.444940000  |
| 6 | -4.582502000 | -4.253760000 | 1.354651000  | 1 | 1.242848000  | 4.665701000  | 0.925790000  |
| 1 | -5.513815000 | -4.800069000 | 1.438520000  | 1 | 2.796095000  | 5.440161000  | 0.672719000  |
| 1 | -4.052890000 | -4.612098000 | 0.480297000  | 1 | 2.058674000  | 4.520731000  | -0.627958000 |
| 1 | -3.982701000 | -4.477343000 | 2.229565000  | 6 | 3.133307000  | 3.351906000  | 2.475271000  |
| 7 | 3.505917000  | 0.788767000  | -0.549640000 | 1 | 3.586247000  | 2.437370000  | 2.836747000  |
| 6 | 2.824782000  | 0.612416000  | -1.754803000 | 1 | 3.781654000  | 4.182866000  | 2.729292000  |
| 6 | 2.161013000  | -0.529765000 | -2.062727000 | 1 | 2.184837000  | 3.493826000  | 2.983586000  |
| 6 | 2.114430000  | -1.788119000 | -1.312880000 | 6 | 6.141883000  | 0.381057000  | -1.790197000 |
| 7 | 2.732175000  | -1.796897000 | -0.050020000 | 1 | 5.317200000  | -0.308216000 | -1.714794000 |
| 6 | 2.835381000  | -3.081973000 | 0.633986000  | 6 | 6.451838000  | 0.607460000  | -3.286503000 |
| 6 | 3.980830000  | -3.871001000 | 0.463217000  | 1 | 7.299833000  | 1.271318000  | -3.409875000 |
| 6 | 4.056908000  | -5.098125000 | 1.105921000  | 1 | 6.692085000  | -0.338332000 | -3.761122000 |
| 6 | 3.037458000  | -5.542547000 | 1.920214000  | 1 | 5.603770000  | 1.037752000  | -3.803685000 |
| 6 | 1.918698000  | -4.758971000 | 2.095571000  | 6 | 7.365902000  | -0.253466000 | -1.094076000 |
| 6 | 1.796525000  | -3.533809000 | 1.455118000  | 1 | 8.228985000  | 0.398284000  | -1.160612000 |
| 6 | 1.501706000  | -2.864083000 | -1.867891000 | 1 | 7.157416000  | -0.439998000 | -0.048020000 |
| 6 | 2.762731000  | 1.784944000  | -2.701823000 | 1 | 7.617522000  | -1.194695000 | -1.569893000 |
| 6 | 4.505531000  | 1.849087000  | -0.464800000 | 6 | 5.139693000  | -3.432926000 | -0.423360000 |
| 6 | 5.752983000  | 1.676914000  | -1.084472000 | 1 | 4.987397000  | -2.395842000 | -0.671946000 |
| 6 | 6.683540000  | 2.703643000  | -1.030780000 | 6 | 6.492535000  | -3.568312000 | 0.308640000  |
| 6 | 6.414043000  | 3.876384000  | -0.358426000 | 1 | 6.712385000  | -4.603219000 | 0.541017000  |
| 6 | 5.200256000  | 4.031389000  | 0.272813000  | 1 | 7.292807000  | -3.195291000 | -0.318959000 |
| 6 | 4.233126000  | 3.036548000  | 0.226898000  | 1 | 6.487280000  | -3.002528000 | 1.232972000  |
| 1 | 1.620840000  | -0.543080000 | -3.004240000 | 6 | 5.151036000  | -4.248946000 | -1.735211000 |
| 1 | 4.923923000  | -5.711852000 | 0.970649000  | 1 | 4.213769000  | -4.126473000 | -2.261907000 |
| 1 | 3.116430000  | -6.490958000 | 2.414906000  | 1 | 5.958265000  | -3.914241000 | -2.380152000 |
| 1 | 1.129686000  | -5.102679000 | 2.734063000  | 1 | 5.298464000  | -5.302905000 | -1.524809000 |
| 1 | 1.448122000  | -3.821629000 | -1.370651000 | 6 | 0.529438000  | -2.719025000 | 1.674254000  |
| 1 | 1.096494000  | -2.781304000 | -2.870320000 | 1 | 0.564181000  | -1.862558000 | 1.023098000  |
| 1 | 2.303071000  | 2.647226000  | -2.207421000 | 6 | -0.731381000 | -3.534110000 | 1.320846000  |
| 1 | 3.754021000  | 2.102482000  | -3.025208000 | 1 | -0.856197000 | -4.378744000 | 1.988219000  |
| 1 | 2.171270000  | 1.527215000  | -3.582894000 | 1 | -1.610396000 | -2.904737000 | 1.408920000  |
| 1 | 7.633678000  | 2.579112000  | -1.510005000 | 1 | -0.671134000 | -3.900801000 | 0.303974000  |

|    |              |              |             |   |              |              |              |
|----|--------------|--------------|-------------|---|--------------|--------------|--------------|
| 6  | 0.455653000  | -2.222062000 | 3.133460000 | 6 | 4.675577000  | -2.516856000 | 1.383522000  |
| 1  | 1.312913000  | -1.603189000 | 3.367170000 | 6 | 3.374468000  | -3.264175000 | -0.658570000 |
| 1  | -0.445229000 | -1.635834000 | 3.285297000 | 6 | 1.690031000  | 2.413266000  | -0.890322000 |
| 1  | 0.436511000  | -3.058595000 | 3.822886000 | 6 | 1.161342000  | 2.563132000  | -2.334768000 |
| 1  | 0.768970000  | 0.721955000  | 0.493228000 | 6 | 2.148017000  | 3.781239000  | -0.340292000 |
| 1  | 1.527852000  | 0.258032000  | 0.962368000 | 1 | 0.037564000  | 0.024797000  | 3.546001000  |
| 14 | 3.193116000  | -0.309711000 | 0.881965000 | 1 | -1.373998000 | 2.007986000  | 0.835780000  |
| 14 | -4.115255000 | 0.774953000  | 0.461445000 | 1 | -2.390335000 | 3.401841000  | 2.621322000  |

*Si-inter-IM<sub>1,4</sub>*

|   |              |              |              |   |              |              |              |
|---|--------------|--------------|--------------|---|--------------|--------------|--------------|
| 1 | -0.830490000 | -2.250461000 | 1.556394000  | 1 | -2.941210000 | 1.735757000  | 2.748442000  |
| 1 | -0.128501000 | -2.337496000 | 0.740544000  | 1 | -1.734973000 | 4.358170000  | 0.326479000  |
| 7 | 1.409818000  | -0.151583000 | 0.494238000  | 1 | -3.378982000 | 4.058222000  | -0.197649000 |
| 6 | 1.248039000  | 0.172447000  | 1.817496000  | 1 | -2.034035000 | 3.417414000  | -1.130924000 |
| 6 | 0.066627000  | -0.061431000 | 2.466675000  | 1 | -4.862656000 | 2.446685000  | -0.328083000 |
| 6 | -1.136768000 | -0.535885000 | 1.817425000  | 1 | -6.170154000 | 0.686298000  | -1.411635000 |
| 7 | -1.298694000 | -0.282199000 | 0.479348000  | 1 | -5.236241000 | -1.553832000 | -1.643101000 |
| 6 | -2.652038000 | -0.090941000 | -0.054508000 | 1 | -1.961923000 | -2.654776000 | -0.348331000 |
| 6 | -3.178033000 | 1.206739000  | 0.060256000  | 1 | -4.093486000 | -3.364592000 | 0.768586000  |
| 6 | -2.393876000 | 2.335031000  | 0.724938000  | 1 | -3.456299000 | -4.562588000 | -0.348672000 |
| 6 | -2.967631000 | 2.625107000  | 2.130044000  | 1 | -4.823062000 | -3.568871000 | -0.814843000 |
| 6 | -2.389911000 | 3.621674000  | -0.128187000 | 1 | -2.268683000 | -3.834687000 | -2.484595000 |
| 6 | -4.449186000 | 1.463580000  | -0.423783000 | 1 | -3.586549000 | -2.754310000 | -2.918235000 |
| 6 | -5.189486000 | 0.472538000  | -1.034531000 | 1 | -1.945335000 | -2.132651000 | -2.779953000 |
| 6 | -4.660456000 | -0.790693000 | -1.160821000 | 1 | -2.834856000 | -1.852142000 | 1.996714000  |
| 6 | -3.395737000 | -1.102319000 | -0.672921000 | 1 | -1.678920000 | -1.818956000 | 3.445467000  |
| 6 | -2.898853000 | -2.534259000 | -0.864382000 | 1 | 2.140932000  | 0.927372000  | 3.610433000  |
| 6 | -3.884480000 | -3.568675000 | -0.274516000 | 1 | 3.282091000  | 0.103531000  | 2.520986000  |
| 6 | -2.659266000 | -2.829723000 | -2.362038000 | 1 | 2.706031000  | 1.711912000  | 2.121352000  |
| 6 | -1.873664000 | -1.569279000 | 2.407464000  | 1 | 4.134938000  | 2.572189000  | -2.014053000 |
| 6 | 2.411200000  | 0.759295000  | 2.567184000  | 1 | 5.934850000  | 0.921130000  | -2.042330000 |
| 6 | 2.659962000  | 0.153465000  | -0.190398000 | 1 | 5.642165000  | -1.231948000 | -0.926618000 |
| 6 | 2.810550000  | 1.378587000  | -0.846781000 | 1 | 2.596339000  | -2.168792000 | 1.006248000  |
| 6 | 4.003717000  | 1.638269000  | -1.505776000 | 1 | 4.479734000  | -3.461084000 | 1.880482000  |
| 6 | 5.019979000  | 0.706390000  | -1.525909000 | 1 | 5.609386000  | -2.612526000 | 0.842769000  |
| 6 | 4.853838000  | -0.507548000 | -0.891834000 | 1 | 4.798883000  | -1.752195000 | 2.141773000  |
| 6 | 3.678196000  | -0.805429000 | -0.218951000 | 1 | 3.217490000  | -4.235666000 | -0.201358000 |
| 6 | 3.508927000  | -2.176085000 | 0.431124000  | 1 | 2.535614000  | -3.051516000 | -1.309827000 |
|   |              |              |              | 1 | 4.273418000  | -3.310421000 | -1.262658000 |

|    |             |              |              |   |              |              |              |
|----|-------------|--------------|--------------|---|--------------|--------------|--------------|
| 1  | 0.878479000 | 2.057608000  | -0.275542000 | 6 | -2.829304000 | -3.726309000 | -0.034332000 |
| 1  | 0.335516000 | 3.266237000  | -2.360483000 | 1 | -2.143234000 | -2.902866000 | -0.120857000 |
| 1  | 0.814209000 | 1.609644000  | -2.713854000 | 6 | -6.156669000 | -0.213619000 | -1.782517000 |
| 1  | 1.941298000 | 2.929801000  | -2.992071000 | 1 | -5.322528000 | 0.441562000  | -1.585310000 |
| 1  | 1.312522000 | 4.473282000  | -0.329400000 | 6 | -2.207063000 | -4.927650000 | -0.779695000 |
| 1  | 2.526773000 | 3.688830000  | 0.671048000  | 1 | -2.789318000 | -5.829200000 | -0.634044000 |
| 1  | 2.929129000 | 4.208770000  | -0.957540000 | 1 | -2.133937000 | -4.736580000 | -1.844181000 |
| 14 | 0.095436000 | -0.974563000 | -0.501579000 | 1 | -1.208424000 | -5.108050000 | -0.400716000 |

*Si-inter-TS<sub>1,4</sub>-II*

|   |              |              |              |   |              |              |              |
|---|--------------|--------------|--------------|---|--------------|--------------|--------------|
| 7 | -2.589315000 | 1.372552000  | 0.368865000  | 1 | -2.032045000 | -4.310825000 | 1.897562000  |
| 6 | -1.703439000 | 1.407030000  | -0.646884000 | 1 | -3.398431000 | -3.211930000 | 2.010347000  |
| 6 | -1.711385000 | 0.428307000  | -1.647514000 | 1 | -3.663284000 | -4.899149000 | 1.598900000  |
| 6 | -2.616086000 | -0.625674000 | -1.759044000 | 6 | -6.538429000 | -0.058431000 | -3.271248000 |
| 7 | -3.476093000 | -0.927721000 | -0.764139000 | 1 | -7.404418000 | -0.661755000 | -3.513634000 |
| 6 | -4.485578000 | -1.994103000 | -0.961781000 | 1 | -6.779042000 | 0.977213000  | -3.485955000 |
| 6 | -4.173956000 | -3.315693000 | -0.624698000 | 1 | -5.723825000 | -0.359529000 | -3.918947000 |
| 6 | -5.147610000 | -4.286143000 | -0.811663000 | 6 | -7.333021000 | 0.220098000  | -0.878231000 |
| 6 | -6.387812000 | -3.964622000 | -1.318836000 | 1 | -7.061563000 | 0.149346000  | 0.168804000  |
| 6 | -6.682506000 | -2.656659000 | -1.635888000 | 1 | -7.614687000 | 1.243321000  | -1.094381000 |
| 6 | -5.747214000 | -1.647598000 | -1.456067000 | 1 | -8.197556000 | -0.409631000 | -1.045991000 |
| 6 | -0.644950000 | 2.459848000  | -0.704818000 | 6 | -1.310934000 | 1.672918000  | 3.058505000  |
| 6 | -2.826819000 | 2.583903000  | 1.186528000  | 1 | -1.092944000 | 0.914363000  | 2.323114000  |
| 6 | -2.234280000 | 2.720126000  | 2.443005000  | 6 | -2.005387000 | 1.007344000  | 4.269138000  |
| 6 | -2.510631000 | 3.869549000  | 3.173688000  | 1 | -2.209486000 | 1.741941000  | 5.039271000  |
| 6 | -3.330360000 | 4.854978000  | 2.673337000  | 1 | -2.942411000 | 0.545686000  | 3.981543000  |
| 6 | -3.907099000 | 4.704853000  | 1.429141000  | 1 | -1.362729000 | 0.244427000  | 4.689639000  |
| 6 | -3.679981000 | 3.568916000  | 0.669175000  | 6 | 0.036907000  | 2.291064000  | 3.490857000  |
| 1 | -0.987093000 | 0.547353000  | -2.440350000 | 1 | 0.702976000  | 1.508452000  | 3.830353000  |
| 1 | -4.930485000 | -5.302119000 | -0.555374000 | 1 | 0.519560000  | 2.793401000  | 2.664101000  |
| 1 | -7.124924000 | -4.729897000 | -1.459766000 | 1 | -0.098449000 | 2.997251000  | 4.301301000  |
| 1 | -7.652155000 | -2.414059000 | -2.019363000 | 6 | -4.354255000 | 3.456047000  | -0.697228000 |
| 1 | -0.342537000 | 2.653993000  | -1.734818000 | 1 | -4.215801000 | 2.453345000  | -1.070315000 |
| 1 | -0.933948000 | 3.381794000  | -0.207686000 | 6 | -5.873589000 | 3.716791000  | -0.598601000 |
| 1 | 0.228192000  | 2.035578000  | -0.185341000 | 1 | -6.341824000 | 3.519321000  | -1.557021000 |
| 1 | -2.069274000 | 3.992335000  | 4.140520000  | 1 | -6.330419000 | 3.080293000  | 0.148638000  |
| 1 | -3.521502000 | 5.738251000  | 3.249656000  | 1 | -6.077151000 | 4.747850000  | -0.339151000 |
| 1 | -4.542909000 | 5.477046000  | 1.048230000  | 6 | -3.719538000 | 4.439939000  | -1.706400000 |
|   |              |              |              | 1 | -3.847428000 | 5.460907000  | -1.366982000 |

|   |              |              |              |   |              |              |              |
|---|--------------|--------------|--------------|---|--------------|--------------|--------------|
| 1 | -2.660378000 | 4.254015000  | -1.827817000 | 1 | 5.028370000  | 5.319250000  | -0.840194000 |
| 1 | -4.196744000 | 4.341144000  | -2.675711000 | 6 | 2.945810000  | 3.801455000  | -0.087715000 |
| 6 | -2.618016000 | -1.448506000 | -3.014514000 | 1 | 2.279101000  | 2.956837000  | -0.052120000 |
| 1 | -1.831481000 | -1.109166000 | -3.688642000 | 6 | 2.261583000  | 4.944102000  | -0.869460000 |
| 1 | -2.460241000 | -2.503009000 | -2.782286000 | 1 | 1.311171000  | 5.193222000  | -0.406707000 |
| 1 | -3.582247000 | -1.372893000 | -3.520791000 | 1 | 2.870991000  | 5.839737000  | -0.870141000 |
| 1 | -1.503680000 | -0.933330000 | 0.994747000  | 1 | 2.078743000  | 4.659958000  | -1.899828000 |
| 1 | -0.869355000 | -1.197106000 | 0.588447000  | 6 | 3.224985000  | 4.241554000  | 1.366945000  |
| 7 | 3.474988000  | 0.988239000  | -0.722025000 | 1 | 3.659959000  | 3.424640000  | 1.928320000  |
| 6 | 2.553622000  | 0.668121000  | -1.676842000 | 1 | 3.912957000  | 5.079410000  | 1.385548000  |
| 6 | 1.597723000  | -0.304294000 | -1.496404000 | 1 | 2.303334000  | 4.544864000  | 1.854856000  |
| 6 | 1.535166000  | -1.314791000 | -0.453666000 | 6 | 6.102277000  | 0.134919000  | -1.720940000 |
| 7 | 2.561686000  | -1.334532000 | 0.472267000  | 1 | 5.246002000  | -0.460134000 | -1.449568000 |
| 6 | 2.864732000  | -2.585590000 | 1.138964000  | 6 | 6.469783000  | -0.166388000 | -3.189985000 |
| 6 | 3.573495000  | -3.583583000 | 0.447346000  | 1 | 7.350566000  | 0.387992000  | -3.493460000 |
| 6 | 3.873651000  | -4.773702000 | 1.089476000  | 1 | 6.680052000  | -1.223687000 | -3.311552000 |
| 6 | 3.506151000  | -4.990475000 | 2.401774000  | 1 | 5.656277000  | 0.097013000  | -3.856420000 |
| 6 | 2.815085000  | -4.012266000 | 3.079157000  | 6 | 7.268438000  | -0.243764000 | -0.780229000 |
| 6 | 2.473169000  | -2.814367000 | 2.463104000  | 1 | 8.147400000  | 0.352867000  | -0.996392000 |
| 6 | 0.498672000  | -2.227907000 | -0.464603000 | 1 | 6.982769000  | -0.079155000 | 0.251347000  |
| 6 | 2.580679000  | 1.414017000  | -2.990331000 | 1 | 7.529953000  | -1.288211000 | -0.904979000 |
| 6 | 4.493358000  | 1.987236000  | -1.006830000 | 6 | 4.021296000  | -3.396794000 | -0.997919000 |
| 6 | 5.736456000  | 1.599835000  | -1.519583000 | 1 | 3.843320000  | -2.368120000 | -1.264827000 |
| 6 | 6.682471000  | 2.572969000  | -1.810565000 | 6 | 5.528360000  | -3.689873000 | -1.162147000 |
| 6 | 6.425864000  | 3.907540000  | -1.583968000 | 1 | 5.742719000  | -4.741162000 | -1.008303000 |
| 6 | 5.215070000  | 4.283505000  | -1.042293000 | 1 | 5.848845000  | -3.430015000 | -2.166162000 |
| 6 | 4.241730000  | 3.341474000  | -0.745040000 | 1 | 6.109686000  | -3.115308000 | -0.453207000 |
| 1 | 0.900989000  | -0.452172000 | -2.312247000 | 6 | 3.205880000  | -4.301109000 | -1.948780000 |
| 1 | 4.409416000  | -5.537171000 | 0.561810000  | 1 | 2.150291000  | -4.082951000 | -1.862906000 |
| 1 | 3.757966000  | -5.912438000 | 2.888961000  | 1 | 3.512644000  | -4.137479000 | -2.977964000 |
| 1 | 2.530048000  | -4.180233000 | 4.098585000  | 1 | 3.368352000  | -5.346697000 | -1.708710000 |
| 1 | 0.495810000  | -3.075064000 | 0.208337000  | 6 | 1.662433000  | -1.798156000 | 3.259104000  |
| 1 | -0.155467000 | -2.263821000 | -1.330554000 | 1 | 1.416883000  | -0.977017000 | 2.604255000  |
| 1 | 2.483919000  | 2.491678000  | -2.842011000 | 6 | 0.341010000  | -2.422585000 | 3.759350000  |
| 1 | 3.528835000  | 1.252874000  | -3.508253000 | 1 | 0.529528000  | -3.230065000 | 4.456865000  |
| 1 | 1.771321000  | 1.068110000  | -3.637934000 | 1 | -0.256090000 | -1.675386000 | 4.270158000  |
| 1 | 7.633430000  | 2.280312000  | -2.208464000 | 1 | -0.234782000 | -2.813047000 | 2.929428000  |
| 1 | 7.168554000  | 4.647005000  | -1.812038000 | 6 | 2.478862000  | -1.249099000 | 4.449642000  |

|    |              |              |             |   |              |             |              |
|----|--------------|--------------|-------------|---|--------------|-------------|--------------|
| 1  | 3.390589000  | -0.785866000 | 4.096860000 | 1 | -6.712250000 | 4.333893000 | -0.351463000 |
| 1  | 1.901596000  | -0.505859000 | 4.992647000 | 1 | -5.252145000 | 6.285055000 | -0.529159000 |
| 1  | 2.734576000  | -2.046247000 | 5.139015000 | 1 | -2.827510000 | 6.006473000 | -0.383499000 |
| 1  | 1.915651000  | 0.948588000  | 1.169011000 | 6 | -1.390700000 | 3.770825000 | -0.030023000 |
| 14 | 3.316654000  | 0.289930000  | 1.027107000 | 1 | -1.167445000 | 2.753416000 | 0.243649000  |
| 14 | -3.495092000 | -0.130219000 | 0.874943000 | 6 | -0.732087000 | 4.717597000 | 0.996993000  |

*Si-inter-TS<sub>1,4</sub>'*

|   |              |              |              |   |              |              |              |
|---|--------------|--------------|--------------|---|--------------|--------------|--------------|
| 1 | -0.047482000 | 0.484491000  | -0.181716000 | 1 | -0.890019000 | 5.755036000  | 0.728938000  |
| 1 | -1.078643000 | 0.386294000  | -0.592709000 | 1 | -1.134863000 | 4.560205000  | 1.990395000  |
| 7 | -3.179145000 | 1.469303000  | 0.350077000  | 6 | -0.818350000 | 4.034197000  | -1.441394000 |
| 6 | -3.043351000 | 1.065748000  | 1.676191000  | 1 | -1.268537000 | 3.362003000  | -2.161286000 |
| 6 | -2.689591000 | -0.198156000 | 2.025870000  | 1 | -1.027789000 | 5.052104000  | -1.749100000 |
| 6 | -2.559442000 | -1.374826000 | 1.164241000  | 1 | 0.257474000  | 3.889160000  | -1.456076000 |
| 7 | -2.954174000 | -1.215230000 | -0.175801000 | 6 | -6.085575000 | 1.755914000  | -0.004331000 |
| 6 | -3.327101000 | -2.416506000 | -0.906643000 | 1 | -5.505904000 | 0.864232000  | 0.167393000  |
| 6 | -4.600882000 | -2.973992000 | -0.703398000 | 6 | -7.114520000 | 1.894407000  | 1.138532000  |
| 6 | -4.957476000 | -4.119010000 | -1.396418000 | 1 | -7.747911000 | 2.761501000  | 0.990242000  |
| 6 | -4.090134000 | -4.712406000 | -2.291139000 | 1 | -7.749845000 | 1.015709000  | 1.173531000  |
| 6 | -2.843698000 | -4.164637000 | -2.489386000 | 1 | -6.619745000 | 1.993304000  | 2.097544000  |
| 6 | -2.440229000 | -3.027967000 | -1.798871000 | 6 | -6.804204000 | 1.611574000  | -1.365002000 |
| 6 | -2.141774000 | -2.551402000 | 1.692853000  | 1 | -7.385361000 | 2.498382000  | -1.589889000 |
| 6 | -3.284788000 | 2.086743000  | 2.759480000  | 1 | -6.081453000 | 1.463212000  | -2.158164000 |
| 6 | -3.742947000 | 2.786397000  | 0.076421000  | 1 | -7.477015000 | 0.762601000  | -1.346781000 |
| 6 | -5.129171000 | 2.941742000  | -0.050041000 | 6 | -5.601046000 | -2.362230000 | 0.270532000  |
| 6 | -5.651897000 | 4.210157000  | -0.260971000 | 1 | -5.203523000 | -1.414766000 | 0.594777000  |
| 6 | -4.831644000 | 5.312098000  | -0.366068000 | 6 | -6.966587000 | -2.116027000 | -0.407136000 |
| 6 | -3.465605000 | 5.152036000  | -0.277248000 | 1 | -7.455503000 | -3.051335000 | -0.653740000 |
| 6 | -2.906312000 | 3.901902000  | -0.060026000 | 1 | -7.619846000 | -1.568264000 | 0.264944000  |
| 1 | -2.545331000 | -0.390652000 | 3.084321000  | 1 | -6.847204000 | -1.543137000 | -1.317763000 |
| 1 | -5.925805000 | -4.550096000 | -1.239784000 | 6 | -5.783774000 | -3.265961000 | 1.509980000  |
| 1 | -4.385784000 | -5.593590000 | -2.826525000 | 1 | -4.835680000 | -3.417836000 | 2.006672000  |
| 1 | -2.170173000 | -4.625464000 | -3.184177000 | 1 | -6.473943000 | -2.805615000 | 2.210991000  |
| 1 | -2.085840000 | -3.456293000 | 1.104576000  | 1 | -6.187385000 | -4.230388000 | 1.220333000  |
| 1 | -1.937219000 | -2.614132000 | 2.755393000  | 6 | -1.034773000 | -2.493387000 | -2.041768000 |
| 1 | -2.636676000 | 2.957841000  | 2.643662000  | 1 | -0.868828000 | -1.666561000 | -1.372711000 |
| 1 | -4.312643000 | 2.454972000  | 2.731840000  | 6 | 0.032917000  | -3.565275000 | -1.732508000 |
| 1 | -3.103753000 | 1.638835000  | 3.738623000  | 1 | -0.043198000 | -4.405447000 | -2.412834000 |
|   |              |              |              | 1 | 1.025549000  | -3.137610000 | -1.836990000 |

|   |              |              |              |   |             |              |              |
|---|--------------|--------------|--------------|---|-------------|--------------|--------------|
| 1 | -0.081301000 | -3.932324000 | -0.719554000 | 6 | 3.827003000 | -1.769501000 | -3.063649000 |
| 6 | -0.883579000 | -1.985094000 | -3.491620000 | 1 | 3.047884000 | -1.745601000 | -2.317207000 |
| 1 | -1.628653000 | -1.229521000 | -3.704581000 | 6 | 3.919175000 | 4.182418000  | -1.934503000 |
| 1 | 0.098776000  | -1.548798000 | -3.633685000 | 1 | 4.611230000 | 4.613168000  | -2.648202000 |
| 1 | -1.003712000 | -2.799222000 | -4.198050000 | 1 | 3.016230000 | 3.895365000  | -2.458540000 |
| 7 | 2.638287000  | -0.447635000 | 1.448265000  | 1 | 3.667460000 | 4.945973000  | -1.205565000 |
| 6 | 1.545771000  | 0.328778000  | 1.310557000  | 6 | 5.816225000 | 3.365543000  | -0.452333000 |
| 6 | 1.164430000  | 0.904176000  | 0.065879000  | 1 | 5.576919000 | 4.120699000  | 0.289503000  |
| 6 | 1.955795000  | 0.738839000  | -1.191793000 | 1 | 6.250652000 | 2.510215000  | 0.053131000  |
| 7 | 3.308898000  | 0.324675000  | -1.040864000 | 1 | 6.562408000 | 3.776934000  | -1.121182000 |
| 6 | 4.228793000  | 0.593664000  | -2.156764000 | 6 | 3.162219000 | -2.108013000 | -4.415760000 |
| 6 | 4.844441000  | 1.848240000  | -2.228377000 | 1 | 3.901867000 | -2.222043000 | -5.198795000 |
| 6 | 5.751629000  | 2.082069000  | -3.249077000 | 1 | 2.615914000 | -3.040841000 | -4.331713000 |
| 6 | 6.044990000  | 1.101650000  | -4.175226000 | 1 | 2.466042000 | -1.332513000 | -4.708705000 |
| 6 | 5.423734000  | -0.125772000 | -4.099576000 | 6 | 4.846966000 | -2.866868000 | -2.683671000 |
| 6 | 4.500864000  | -0.401006000 | -3.098628000 | 1 | 5.315555000 | -2.653466000 | -1.729922000 |
| 6 | 1.404763000  | 1.019231000  | -2.380352000 | 1 | 4.353784000 | -3.831026000 | -2.618114000 |
| 6 | 0.604899000  | 0.525645000  | 2.450282000  | 1 | 5.626978000 | -2.934319000 | -3.433055000 |
| 6 | 2.978334000  | -1.044513000 | 2.757586000  | 6 | 4.113974000 | 1.167009000  | 3.447298000  |
| 6 | 3.697285000  | -0.285071000 | 3.686886000  | 1 | 3.703899000 | 1.503755000  | 2.506177000  |
| 6 | 4.063622000  | -0.890351000 | 4.880523000  | 6 | 5.653814000 | 1.281633000  | 3.364944000  |
| 6 | 3.737271000  | -2.203577000 | 5.139420000  | 1 | 6.106498000 | 0.999454000  | 4.307542000  |
| 6 | 3.034759000  | -2.938992000 | 4.207843000  | 1 | 6.051245000 | 0.636434000  | 2.591342000  |
| 6 | 2.641486000  | -2.378329000 | 3.001472000  | 1 | 5.939425000 | 2.304352000  | 3.143578000  |
| 1 | 0.807345000  | 1.924675000  | 0.209143000  | 6 | 3.572907000 | 2.104929000  | 4.550077000  |
| 1 | 6.234664000  | 3.035501000  | -3.319771000 | 1 | 3.832461000 | 3.131976000  | 4.317918000  |
| 1 | 6.753678000  | 1.296585000  | -4.955637000 | 1 | 2.495502000 | 2.036443000  | 4.634321000  |
| 1 | 5.654147000  | -0.878083000 | -4.825760000 | 1 | 4.005285000 | 1.859949000  | 5.511990000  |
| 1 | 1.969726000  | 0.964138000  | -3.300795000 | 6 | 1.907179000 | -3.230208000 | 1.968183000  |
| 1 | 0.363982000  | 1.316055000  | -2.430479000 | 1 | 1.322353000 | -2.581663000 | 1.332477000  |
| 1 | 1.098143000  | 0.540214000  | 3.418507000  | 6 | 2.939754000 | -3.989268000 | 1.102435000  |
| 1 | 0.004652000  | 1.425180000  | 2.303727000  | 1 | 2.435341000 | -4.580324000 | 0.346847000  |
| 1 | -0.100271000 | -0.320543000 | 2.434751000  | 1 | 3.621591000 | -3.310295000 | 0.604427000  |
| 1 | 4.613441000  | -0.330571000 | 5.608919000  | 1 | 3.529176000 | -4.651554000 | 1.725955000  |
| 1 | 4.032142000  | -2.655725000 | 6.065444000  | 6 | 0.937268000 | -4.244156000 | 2.609747000  |
| 1 | 2.790642000  | -3.957774000 | 4.421044000  | 1 | 1.472283000 | -5.035254000 | 3.121345000  |
| 6 | 4.543507000  | 2.959919000  | -1.227744000 | 1 | 0.269921000 | -3.759884000 | 3.309747000  |
| 1 | 3.822052000  | 2.588603000  | -0.517719000 | 1 | 0.335318000 | -4.699687000 | 1.833567000  |



|                                   |              |              |              |   |              |              |              |
|-----------------------------------|--------------|--------------|--------------|---|--------------|--------------|--------------|
| 14                                | 4.068818000  | -0.475901000 | 0.296524000  | 1 | 1.205710000  | -1.845133000 | -1.732071000 |
| 14                                | -2.720118000 | 0.367227000  | -1.047661000 | 6 | 0.416990000  | -3.755585000 | -2.333153000 |
|                                   |              |              |              | 1 | -0.609955000 | -3.401322000 | -2.389323000 |
| <i>Si-inter-IM<sub>1,4'</sub></i> |              |              |              | 1 | 0.551947000  | -4.488030000 | -3.119479000 |
| 1                                 | -1.025900000 | 0.755487000  | -0.750522000 | 1 | 0.560914000  | -4.257772000 | -1.382381000 |
| 1                                 | 1.382172000  | 0.293351000  | -0.691395000 | 6 | 1.214566000  | -1.900202000 | -3.870331000 |
| 7                                 | 3.203265000  | -1.375597000 | -0.504007000 | 1 | 1.875233000  | -1.047928000 | -3.957485000 |
| 6                                 | 2.998563000  | -1.673446000 | 0.837437000  | 1 | 1.428773000  | -2.595515000 | -4.673891000 |
| 6                                 | 2.952322000  | -0.717167000 | 1.803787000  | 1 | 0.189786000  | -1.556142000 | -3.988329000 |
| 6                                 | 3.276916000  | 0.711865000  | 1.695574000  | 6 | 6.033076000  | -2.158323000 | -0.362699000 |
| 7                                 | 3.450421000  | 1.229047000  | 0.405950000  | 1 | 5.517552000  | -1.376296000 | 0.169811000  |
| 6                                 | 3.794124000  | 2.634375000  | 0.294402000  | 6 | 6.641615000  | -3.135642000 | 0.666604000  |
| 6                                 | 5.127623000  | 3.021939000  | 0.118331000  | 1 | 7.198939000  | -3.923276000 | 0.171837000  |
| 6                                 | 5.436558000  | 4.371922000  | 0.027071000  | 1 | 7.321642000  | -2.603198000 | 1.323566000  |
| 6                                 | 4.453108000  | 5.335470000  | 0.090892000  | 1 | 5.873445000  | -3.592963000 | 1.277466000  |
| 6                                 | 3.138341000  | 4.953024000  | 0.250516000  | 6 | 7.158940000  | -1.508785000 | -1.196958000 |
| 6                                 | 2.794164000  | 3.614068000  | 0.360252000  | 1 | 7.728631000  | -2.261495000 | -1.730074000 |
| 6                                 | 3.429990000  | 1.429993000  | 2.839644000  | 1 | 6.744371000  | -0.815941000 | -1.917842000 |
| 6                                 | 2.762889000  | -3.117164000 | 1.213995000  | 1 | 7.838398000  | -0.967367000 | -0.547349000 |
| 6                                 | 3.696735000  | -2.422694000 | -1.377328000 | 6 | 6.247754000  | 1.994221000  | 0.041193000  |
| 6                                 | 5.033211000  | -2.843486000 | -1.289156000 | 1 | 5.785650000  | 1.027611000  | -0.067189000 |
| 6                                 | 5.476741000  | -3.877280000 | -2.100090000 | 6 | 7.160406000  | 2.240638000  | -1.179027000 |
| 6                                 | 4.637430000  | -4.480751000 | -3.012524000 | 1 | 7.679102000  | 3.189004000  | -1.099865000 |
| 6                                 | 3.335852000  | -4.043844000 | -3.124910000 | 1 | 7.909431000  | 1.459984000  | -1.246589000 |
| 6                                 | 2.849762000  | -3.025793000 | -2.316932000 | 1 | 6.578834000  | 2.240019000  | -2.093411000 |
| 1                                 | 2.745222000  | -1.055449000 | 2.814002000  | 6 | 7.069897000  | 1.999267000  | 1.348910000  |
| 1                                 | 6.457346000  | 4.672356000  | -0.096934000 | 1 | 6.427707000  | 1.788207000  | 2.194407000  |
| 1                                 | 4.708560000  | 6.374548000  | 0.013584000  | 1 | 7.850129000  | 1.244390000  | 1.308396000  |
| 1                                 | 2.373453000  | 5.703289000  | 0.289950000  | 1 | 7.539660000  | 2.965846000  | 1.499539000  |
| 1                                 | 3.691014000  | 2.478201000  | 2.833884000  | 6 | 1.326206000  | 3.239915000  | 0.526485000  |
| 1                                 | 3.340341000  | 0.928586000  | 3.795777000  | 1 | 1.279898000  | 2.183979000  | 0.733407000  |
| 1                                 | 1.924385000  | -3.533099000 | 0.645358000  | 6 | 0.669873000  | 3.993936000  | 1.702177000  |
| 1                                 | 3.627464000  | -3.742841000 | 0.989737000  | 1 | 0.642667000  | 5.062303000  | 1.523403000  |
| 1                                 | 2.542644000  | -3.197982000 | 2.280967000  | 1 | -0.355150000 | 3.656108000  | 1.838002000  |
| 1                                 | 6.495090000  | -4.203301000 | -2.027554000 | 1 | 1.218715000  | 3.809554000  | 2.616993000  |
| 1                                 | 4.998260000  | -5.274021000 | -3.637694000 | 6 | 0.561339000  | 3.513794000  | -0.786394000 |
| 1                                 | 2.689138000  | -4.499644000 | -3.848352000 | 1 | 0.999953000  | 2.952517000  | -1.601591000 |
| 6                                 | 1.405366000  | -2.578277000 | -2.495737000 | 1 | -0.482851000 | 3.225374000  | -0.685849000 |

|   |              |              |              |    |              |              |              |
|---|--------------|--------------|--------------|----|--------------|--------------|--------------|
| 1 | 0.595254000  | 4.568743000  | -1.035754000 | 1  | -5.868994000 | -1.691209000 | -3.502106000 |
| 7 | -2.623955000 | -0.635340000 | 1.219032000  | 1  | -6.743625000 | -2.841125000 | -2.501343000 |
| 6 | -1.585416000 | -0.849324000 | 0.440895000  | 6  | -7.491265000 | -1.112896000 | -0.473165000 |
| 6 | -1.534278000 | -0.215971000 | -0.909898000 | 1  | -7.611257000 | -2.156986000 | -0.206307000 |
| 6 | -2.836877000 | -0.017077000 | -1.636460000 | 1  | -7.280665000 | -0.547610000 | 0.427768000  |
| 7 | -3.880104000 | 0.545477000  | -0.858230000 | 1  | -8.430871000 | -0.758669000 | -0.878880000 |
| 6 | -4.979407000 | 1.218239000  | -1.571896000 | 6  | -2.929530000 | 3.899979000  | -2.943089000 |
| 6 | -6.155704000 | 0.520503000  | -1.860230000 | 1  | -3.587988000 | 4.627012000  | -3.402891000 |
| 6 | -7.184557000 | 1.202876000  | -2.495913000 | 1  | -1.986916000 | 4.388195000  | -2.724688000 |
| 6 | -7.050715000 | 2.530692000  | -2.838807000 | 1  | -2.744869000 | 3.102832000  | -3.652612000 |
| 6 | -5.878462000 | 3.202224000  | -2.558182000 | 6  | -3.804307000 | 4.471035000  | -0.624560000 |
| 6 | -4.823792000 | 2.562411000  | -1.926806000 | 1  | -4.223304000 | 4.078242000  | 0.295648000  |
| 6 | -2.943922000 | -0.278980000 | -2.943464000 | 1  | -2.876635000 | 4.981286000  | -0.390106000 |
| 6 | -0.368043000 | -1.556204000 | 0.860141000  | 1  | -4.499262000 | 5.197737000  | -1.028078000 |
| 6 | -2.711366000 | -1.241794000 | 2.567641000  | 6  | -3.849482000 | -3.285145000 | 1.499782000  |
| 6 | -3.326376000 | -2.489333000 | 2.694232000  | 1  | -3.784826000 | -2.671571000 | 0.612908000  |
| 6 | -3.443641000 | -3.023848000 | 3.968278000  | 6  | -5.331252000 | -3.676773000 | 1.690446000  |
| 6 | -2.982027000 | -2.336119000 | 5.071591000  | 1  | -5.448162000 | -4.368262000 | 2.515161000  |
| 6 | -2.389326000 | -1.100622000 | 4.921684000  | 1  | -5.943071000 | -2.804876000 | 1.887903000  |
| 6 | -2.238722000 | -0.525909000 | 3.667436000  | 1  | -5.700354000 | -4.162474000 | 0.793737000  |
| 1 | -0.841061000 | -0.780272000 | -1.533250000 | 6  | -2.986813000 | -4.546575000 | 1.269031000  |
| 1 | -8.096643000 | 0.690082000  | -2.723228000 | 1  | -3.341891000 | -5.087533000 | 0.398825000  |
| 1 | -7.856973000 | 3.041639000  | -3.326496000 | 1  | -1.947050000 | -4.288475000 | 1.110647000  |
| 1 | -5.782375000 | 4.232876000  | -2.831889000 | 1  | -3.044657000 | -5.206016000 | 2.126476000  |
| 1 | -3.848228000 | -0.062697000 | -3.496169000 | 6  | -1.559688000 | 0.836423000  | 3.549409000  |
| 1 | -2.098045000 | -0.689311000 | -3.480976000 | 1  | -1.479486000 | 1.101949000  | 2.504865000  |
| 1 | -0.392490000 | -1.920143000 | 1.883618000  | 6  | -2.395981000 | 1.927880000  | 4.254275000  |
| 1 | -0.154386000 | -2.371016000 | 0.162048000  | 1  | -1.920943000 | 2.893588000  | 4.124516000  |
| 1 | 0.480580000  | -0.848327000 | 0.717236000  | 1  | -3.399736000 | 1.977919000  | 3.848099000  |
| 1 | -3.899594000 | -3.983453000 | 4.098321000  | 1  | -2.468281000 | 1.727298000  | 5.316311000  |
| 1 | -3.083666000 | -2.764598000 | 6.048588000  | 6  | -0.127450000 | 0.789605000  | 4.125871000  |
| 1 | -2.033044000 | -0.577432000 | 5.784528000  | 1  | -0.149294000 | 0.603425000  | 5.193055000  |
| 6 | -6.356612000 | -0.951934000 | -1.510006000 | 1  | 0.462670000  | 0.018380000  | 3.650065000  |
| 1 | -5.441282000 | -1.332400000 | -1.081764000 | 1  | 0.375196000  | 1.731477000  | 3.952978000  |
| 6 | -3.542805000 | 3.338562000  | -1.642150000 | 14 | 2.890267000  | 0.356782000  | -1.119129000 |
| 1 | -2.823997000 | 2.661942000  | -1.210433000 | 14 | -4.088836000 | 0.484205000  | 0.862989000  |
| 6 | -6.659621000 | -1.793349000 | -2.769534000 |    |              |              |              |
| 1 | -7.593053000 | -1.488486000 | -3.226007000 |    |              |              |              |

[(BDI)Ge]

|   |              |              |              |    |                                  |              |              |
|---|--------------|--------------|--------------|----|----------------------------------|--------------|--------------|
| 7 | 1.367869000  | 0.000030000  | 0.544935000  | 1  | -3.022728000                     | 4.310187000  | 1.177117000  |
| 6 | 1.226751000  | -0.000005000 | 1.942111000  | 6  | -2.363469000                     | 3.347862000  | -1.333946000 |
| 6 | 0.024413000  | -0.000061000 | 2.556840000  | 1  | -1.852979000                     | 4.275608000  | -1.095883000 |
| 6 | -1.310023000 | -0.000089000 | 1.959562000  | 1  | -1.735532000                     | 2.771730000  | -2.004424000 |
| 7 | -1.375865000 | -0.000023000 | 0.548054000  | 1  | -3.281308000                     | 3.591489000  | -1.856003000 |
| 6 | -2.697461000 | -0.000001000 | -0.064979000 | 6  | -3.527622000                     | -3.383203000 | 0.924804000  |
| 6 | -3.315525000 | 1.216344000  | -0.368203000 | 1  | -4.482352000                     | -3.630684000 | 0.475455000  |
| 6 | -4.557438000 | 1.194788000  | -0.985789000 | 1  | -3.022669000                     | -4.310301000 | 1.176682000  |
| 6 | -5.175338000 | 0.000053000  | -1.292950000 | 1  | -3.704941000                     | -2.830021000 | 1.838316000  |
| 6 | -4.557419000 | -1.194708000 | -0.985933000 | 6  | -2.363494000                     | -3.347762000 | -1.334318000 |
| 6 | -3.315504000 | -1.216319000 | -0.368349000 | 1  | -1.735593000                     | -2.771573000 | -2.004779000 |
| 6 | -2.406390000 | -0.000166000 | 2.746512000  | 1  | -1.852986000                     | -4.275522000 | -1.096351000 |
| 6 | 2.491613000  | 0.000029000  | 2.756326000  | 1  | -3.281354000                     | -3.591358000 | -1.856352000 |
| 6 | 2.698468000  | 0.000009000  | -0.048981000 | 6  | 2.639435000                      | 2.554275000  | -0.072551000 |
| 6 | 3.316809000  | 1.216195000  | -0.356932000 | 1  | 1.748699000                      | 2.363093000  | 0.505314000  |
| 6 | 4.562568000  | 1.194451000  | -0.966644000 | 6  | 2.217278000                      | 3.228495000  | -1.397947000 |
| 6 | 5.183531000  | -0.000049000 | -1.267502000 | 1  | 3.085565000                      | 3.442041000  | -2.010354000 |
| 6 | 4.562570000  | -1.194525000 | -0.966520000 | 1  | 1.555681000                      | 2.583030000  | -1.963866000 |
| 6 | 3.316814000  | -1.216210000 | -0.356811000 | 1  | 1.700601000                      | 4.161759000  | -1.198868000 |
| 1 | 0.031299000  | -0.000081000 | 3.641785000  | 6  | 3.544911000                      | 3.500863000  | 0.743822000  |
| 1 | -5.043820000 | 2.118052000  | -1.228981000 | 1  | 3.003572000                      | 4.408931000  | 0.987149000  |
| 1 | -6.135141000 | 0.000074000  | -1.771112000 | 1  | 3.861388000                      | 3.034726000  | 1.669238000  |
| 1 | -5.043787000 | -2.117951000 | -1.229234000 | 1  | 4.428699000                      | 3.779214000  | 0.182574000  |
| 1 | -3.408703000 | -0.000182000 | 2.344066000  | 6  | 2.639409000                      | -2.554252000 | -0.072325000 |
| 1 | -2.287098000 | -0.000213000 | 3.823018000  | 1  | 1.748713000                      | -2.363012000 | 0.505582000  |
| 1 | 3.104016000  | -0.877484000 | 2.537111000  | 6  | 2.217149000                      | -3.228500000 | -1.397676000 |
| 1 | 3.103967000  | 0.877573000  | 2.537097000  | 1  | 1.700452000                      | -4.161741000 | -1.198543000 |
| 1 | 2.251021000  | 0.000031000  | 3.820036000  | 1  | 1.555543000                      | -2.583029000 | -1.963577000 |
| 1 | 5.047882000  | 2.116961000  | -1.213687000 | 1  | 3.085397000                      | -3.442087000 | -2.010125000 |
| 1 | 6.145549000  | -0.000073000 | -1.740953000 | 6  | 3.544883000                      | -3.500855000 | 0.744031000  |
| 1 | 5.047890000  | -2.117057000 | -1.213470000 | 1  | 4.428606000                      | -3.779309000 | 0.182733000  |
| 6 | -2.657462000 | 2.553531000  | -0.042164000 | 1  | 3.861465000                      | -3.034688000 | 1.669396000  |
| 1 | -1.719668000 | 2.350651000  | 0.449786000  | 1  | 3.003495000                      | -4.408869000 | 0.987452000  |
| 6 | -2.657432000 | -2.553537000 | -0.042458000 | 32 | -0.014120000                     | 0.000050000  | -0.678908000 |
| 1 | -1.719618000 | -2.350705000 | 0.449473000  |    |                                  |              |              |
| 6 | -3.527684000 | 3.383119000  | 0.925133000  |    | <i>Ge-intra-TS<sub>1,4</sub></i> |              |              |
| 1 | -4.482391000 | 3.630657000  | 0.475767000  | 1  | -0.814184000                     | -2.198290000 | 1.580198000  |
| 1 | -3.705050000 | 2.829858000  | 1.838589000  | 1  | -0.112856000                     | -2.310649000 | 0.791401000  |

|   |              |              |              |    |                     |              |              |
|---|--------------|--------------|--------------|----|---------------------|--------------|--------------|
| 7 | 1.446067000  | -0.082062000 | 0.539437000  | 1  | -2.079492000        | 3.456566000  | -1.141549000 |
| 6 | 1.246024000  | 0.292296000  | 1.840228000  | 1  | -4.916703000        | 2.503112000  | -0.277533000 |
| 6 | 0.063790000  | 0.036741000  | 2.484140000  | 1  | -6.232928000        | 0.723808000  | -1.320202000 |
| 6 | -1.139058000 | -0.459115000 | 1.845897000  | 1  | -5.289649000        | -1.513551000 | -1.545123000 |
| 7 | -1.335311000 | -0.199577000 | 0.515006000  | 1  | -1.979217000        | -2.570442000 | -0.300007000 |
| 6 | -2.692515000 | -0.023048000 | -0.001770000 | 1  | -4.076322000        | -3.309621000 | 0.860958000  |
| 6 | -3.222458000 | 1.274027000  | 0.102659000  | 1  | -3.447774000        | -4.502902000 | -0.266085000 |
| 6 | -2.427504000 | 2.411287000  | 0.737568000  | 1  | -4.835891000        | -3.526677000 | -0.706462000 |
| 6 | -2.981707000 | 2.728892000  | 2.144185000  | 1  | -2.304335000        | -3.766184000 | -2.424336000 |
| 6 | -2.428144000 | 3.680990000  | -0.140310000 | 1  | -3.653641000        | -2.716634000 | -2.835974000 |
| 6 | -4.500898000 | 1.520252000  | -0.366876000 | 1  | -2.025314000        | -2.059494000 | -2.739331000 |
| 6 | -5.245780000 | 0.518826000  | -0.955338000 | 1  | -2.809139000        | -1.805835000 | 2.040980000  |
| 6 | -4.711630000 | -0.742879000 | -1.077378000 | 1  | -1.639904000        | -1.761335000 | 3.475255000  |
| 6 | -3.438461000 | -1.042417000 | -0.604509000 | 1  | 2.106770000         | 1.085786000  | 3.634863000  |
| 6 | -2.927737000 | -2.468538000 | -0.798226000 | 1  | 3.273009000         | 0.271840000  | 2.565297000  |
| 6 | -3.886448000 | -3.514056000 | -0.185459000 | 1  | 2.672008000         | 1.866275000  | 2.145259000  |
| 6 | -2.713607000 | -2.769006000 | -2.299102000 | 1  | 4.150058000         | 2.603901000  | -2.030472000 |
| 6 | -1.844779000 | -1.513771000 | 2.438369000  | 1  | 5.966755000         | 0.971403000  | -1.997913000 |
| 6 | 2.389552000  | 0.912254000  | 2.595996000  | 1  | 5.685872000         | -1.156250000 | -0.830172000 |
| 6 | 2.690309000  | 0.226240000  | -0.142089000 | 1  | 2.628964000         | -2.043841000 | 1.121355000  |
| 6 | 2.829493000  | 1.430660000  | -0.837547000 | 1  | 4.502989000         | -3.346618000 | 2.006292000  |
| 6 | 4.024772000  | 1.683939000  | -1.495532000 | 1  | 5.633511000         | -2.545819000 | 0.932414000  |
| 6 | 5.050457000  | 0.761839000  | -1.481868000 | 1  | 4.856526000         | -1.637695000 | 2.219942000  |
| 6 | 4.891472000  | -0.437630000 | -0.817393000 | 1  | 3.225302000         | -4.150833000 | -0.046751000 |
| 6 | 3.714997000  | -0.726020000 | -0.142846000 | 1  | 2.501363000         | -2.986147000 | -1.147145000 |
| 6 | 3.536265000  | -2.079693000 | 0.539331000  | 1  | 4.240398000         | -3.242999000 | -1.163032000 |
| 6 | 4.709085000  | -2.418925000 | 1.483053000  | 1  | 0.866420000         | 2.068901000  | -0.336868000 |
| 6 | 3.365536000  | -3.187179000 | -0.525506000 | 1  | 0.365034000         | 3.269593000  | -2.431577000 |
| 6 | 1.691382000  | 2.443720000  | -0.922153000 | 1  | 0.893555000         | 1.626745000  | -2.775915000 |
| 6 | 1.206508000  | 2.586417000  | -2.382609000 | 1  | 1.996513000         | 2.974243000  | -3.015094000 |
| 6 | 2.105191000  | 3.819669000  | -0.358101000 | 1  | 1.260646000         | 4.500252000  | -0.383441000 |
| 1 | 0.026273000  | 0.142918000  | 3.561530000  | 1  | 2.444034000         | 3.735895000  | 0.667712000  |
| 1 | -1.408630000 | 2.079038000  | 0.840976000  | 1  | 2.905486000         | 4.254555000  | -0.945253000 |
| 1 | -2.394863000 | 3.511632000  | 2.614184000  | 32 | 0.095844000         | -0.926719000 | -0.524376000 |
| 1 | -4.010864000 | 3.064378000  | 2.079073000  |    |                     |              |              |
| 1 | -2.950132000 | 1.850168000  | 2.777402000  |    | Ge-P <sub>1,4</sub> |              |              |
| 1 | -1.769216000 | 4.425637000  | 0.294922000  | 1  | 0.000064000         | -2.107163000 | -0.381513000 |
| 1 | -3.417379000 | 4.117019000  | -0.211748000 | 7  | 1.422487000         | -0.213333000 | 0.520486000  |

|   |              |              |              |    |                             |              |              |
|---|--------------|--------------|--------------|----|-----------------------------|--------------|--------------|
| 6 | 1.255038000  | -0.303611000 | 1.834881000  | 1  | -4.727294000                | 2.596992000  | -1.008005000 |
| 6 | -0.000020000 | -0.497060000 | 2.438468000  | 1  | -6.233246000                | 0.734534000  | -1.488370000 |
| 6 | -1.255033000 | -0.303563000 | 1.834828000  | 1  | -5.502957000                | -1.563454000 | -1.092113000 |
| 7 | -1.422437000 | -0.213317000 | 0.520425000  | 1  | -2.207482000                | -2.473167000 | 0.384953000  |
| 6 | -2.746395000 | 0.055903000  | -0.030905000 | 1  | -4.359840000                | -2.820966000 | 1.646520000  |
| 6 | -3.140385000 | 1.370626000  | -0.290392000 | 1  | -3.783697000                | -4.283039000 | 0.860076000  |
| 6 | -2.211904000 | 2.556835000  | -0.053305000 | 1  | -5.113467000                | -3.379455000 | 0.161596000  |
| 6 | -2.794305000 | 3.535553000  | 0.989554000  | 1  | -2.574507000                | -4.151843000 | -1.387497000 |
| 6 | -1.935832000 | 3.292742000  | -1.382885000 | 1  | -3.841275000                | -3.149967000 | -2.089079000 |
| 6 | -4.407557000 | 1.593898000  | -0.809768000 | 1  | -2.175017000                | -2.586086000 | -2.078577000 |
| 6 | -5.258128000 | 0.544392000  | -1.085093000 | 1  | -2.847086000                | 0.848013000  | 2.694321000  |
| 6 | -4.845596000 | -0.751562000 | -0.855527000 | 1  | -2.165093000                | -0.375010000 | 3.780452000  |
| 6 | -3.589860000 | -1.019383000 | -0.331095000 | 1  | 2.164857000                 | -0.374948000 | 3.780602000  |
| 6 | -3.149973000 | -2.468854000 | -0.138448000 | 1  | 3.250655000                 | -0.841032000 | 2.451380000  |
| 6 | -4.169792000 | -3.284440000 | 0.685193000  | 1  | 2.847116000                 | 0.847893000  | 2.694460000  |
| 6 | -2.921450000 | -3.131828000 | -1.515665000 | 1  | 4.727391000                 | 2.596869000  | -1.008062000 |
| 6 | -2.447684000 | -0.166689000 | 2.748482000  | 1  | 6.233135000                 | 0.734341000  | -1.488761000 |
| 6 | 2.447605000  | -0.166766000 | 2.748643000  | 1  | 5.502746000                 | -1.563626000 | -1.092508000 |
| 6 | 2.746431000  | 0.055855000  | -0.030870000 | 1  | 2.207377000                 | -2.473176000 | 0.384908000  |
| 6 | 3.140477000  | 1.370578000  | -0.290351000 | 1  | 3.783587000                 | -4.283068000 | 0.860065000  |
| 6 | 4.407594000  | 1.593791000  | -0.809846000 | 1  | 5.113350000                 | -3.379482000 | 0.161573000  |
| 6 | 5.258060000  | 0.544231000  | -1.085363000 | 1  | 4.359705000                 | -2.820960000 | 1.646475000  |
| 6 | 4.845475000  | -0.751693000 | -0.855816000 | 1  | 2.574265000                 | -4.151954000 | -1.387424000 |
| 6 | 3.589774000  | -1.019457000 | -0.331226000 | 1  | 2.174814000                 | -2.586221000 | -2.078593000 |
| 6 | 3.149854000  | -2.468907000 | -0.138513000 | 1  | 3.841050000                 | -3.150187000 | -2.089126000 |
| 6 | 4.169669000  | -3.284467000 | 0.685162000  | 1  | 1.273078000                 | 2.176824000  | 0.317660000  |
| 6 | 2.921248000  | -3.131964000 | -1.515680000 | 1  | 1.247022000                 | 4.114213000  | -1.218301000 |
| 6 | 2.212104000  | 2.556815000  | -0.052992000 | 1  | 1.498678000                 | 2.614507000  | -2.104497000 |
| 6 | 1.935503000  | 3.292672000  | -1.382500000 | 1  | 2.850710000                 | 3.698412000  | -1.797070000 |
| 6 | 2.794903000  | 3.535580000  | 0.989601000  | 1  | 2.097409000                 | 4.346956000  | 1.170197000  |
| 1 | -0.000045000 | -0.586461000 | 3.516363000  | 1  | 2.987115000                 | 3.037211000  | 1.932236000  |
| 1 | -1.272742000 | 2.176806000  | 0.316967000  | 1  | 3.725921000                 | 3.964193000  | 0.637631000  |
| 1 | -2.096772000 | 4.346956000  | 1.169857000  | 1  | -3.250772000                | -0.840821000 | 2.451055000  |
| 1 | -3.725496000 | 3.964125000  | 0.637993000  | 32 | 0.000041000                 | -0.569691000 | -0.805526000 |
| 1 | -2.986071000 | 3.037165000  | 1.932269000  |    |                             |              |              |
| 1 | -1.247342000 | 4.114318000  | -1.218905000 |    | Ge-intra-TS <sub>1,4'</sub> |              |              |
| 1 | -2.851210000 | 3.698438000  | -1.797124000 | 7  | 1.409862000                 | -0.172807000 | 0.489234000  |
| 1 | -1.499218000 | 2.614624000  | -2.105056000 | 6  | 1.267137000                 | -0.374168000 | 1.803901000  |

|   |              |              |              |    |                             |              |              |
|---|--------------|--------------|--------------|----|-----------------------------|--------------|--------------|
| 6 | 0.054984000  | -0.932997000 | 2.277935000  | 1  | -6.163331000                | 0.861877000  | -1.554535000 |
| 6 | -1.303439000 | -0.510242000 | 1.840325000  | 1  | -5.438855000                | -1.462194000 | -1.337658000 |
| 7 | -1.394707000 | -0.242079000 | 0.473760000  | 1  | -2.177939000                | -2.486147000 | 0.130723000  |
| 6 | -2.702442000 | 0.058401000  | -0.082770000 | 1  | -3.795873000                | -4.258441000 | 0.640999000  |
| 6 | -3.108349000 | 1.390391000  | -0.215894000 | 1  | -5.120041000                | -3.259231000 | 0.066898000  |
| 6 | -2.212257000 | 2.540984000  | 0.224642000  | 1  | -4.215076000                | -2.781360000 | 1.500342000  |
| 6 | -2.740236000 | 3.169614000  | 1.533147000  | 1  | -2.678076000                | -4.137064000 | -1.642424000 |
| 6 | -2.084073000 | 3.619401000  | -0.871889000 | 1  | -3.938759000                | -3.090548000 | -2.278880000 |
| 6 | -4.363064000 | 1.659108000  | -0.742973000 | 1  | -2.258669000                | -2.578321000 | -2.342696000 |
| 6 | -5.197983000 | 0.637471000  | -1.144872000 | 1  | -3.324757000                | -0.207964000 | 2.424443000  |
| 6 | -4.787523000 | -0.672899000 | -1.019868000 | 1  | -2.133733000                | -0.682203000 | 3.772035000  |
| 6 | -3.545876000 | -0.984025000 | -0.485250000 | 1  | 2.185226000                 | -0.585978000 | 3.728392000  |
| 6 | -3.137772000 | -2.448314000 | -0.355114000 | 1  | 3.342647000                 | -0.649431000 | 2.375659000  |
| 6 | -4.136077000 | -3.234809000 | 0.520399000  | 1  | 2.628429000                 | 0.883554000  | 2.848468000  |
| 6 | -2.994942000 | -3.104147000 | -1.746264000 | 1  | 4.490864000                 | 2.776984000  | -1.211747000 |
| 6 | -2.319925000 | -0.466135000 | 2.727803000  | 1  | 6.120153000                 | 1.005447000  | -1.629019000 |
| 6 | 2.427420000  | -0.186726000 | 2.743287000  | 1  | 5.572029000                 | -1.312957000 | -1.097206000 |
| 6 | 2.715084000  | 0.151783000  | -0.083558000 | 1  | 2.441972000                 | -2.388580000 | 0.583766000  |
| 6 | 3.005721000  | 1.475280000  | -0.412777000 | 1  | 4.152114000                 | -4.059563000 | 0.973897000  |
| 6 | 4.247771000  | 1.764394000  | -0.961715000 | 1  | 5.346059000                 | -3.149157000 | 0.073703000  |
| 6 | 5.167509000  | 0.766948000  | -1.199018000 | 1  | 4.744666000                 | -2.528746000 | 1.603263000  |
| 6 | 4.857111000  | -0.542687000 | -0.893038000 | 1  | 2.762437000                 | -4.120340000 | -1.162142000 |
| 6 | 3.634528000  | -0.875641000 | -0.331311000 | 1  | 2.137337000                 | -2.627652000 | -1.847596000 |
| 6 | 3.317937000  | -2.341713000 | -0.042327000 | 1  | 3.837473000                 | -3.034436000 | -2.037801000 |
| 6 | 4.466859000  | -3.058643000 | 0.699392000  | 1  | 1.082661000                 | 2.164820000  | 0.159049000  |
| 6 | 2.992173000  | -3.078766000 | -1.360977000 | 1  | 0.947158000                 | 4.077827000  | -1.397442000 |
| 6 | 1.998732000  | 2.600319000  | -0.205821000 | 1  | 1.315073000                 | 2.597019000  | -2.271729000 |
| 6 | 1.693045000  | 3.306269000  | -1.544928000 | 1  | 2.582916000                 | 3.771744000  | -1.951210000 |
| 6 | 2.505499000  | 3.617259000  | 0.839433000  | 1  | 1.758733000                 | 4.386660000  | 1.004309000  |
| 1 | 0.081742000  | -1.251182000 | 3.315724000  | 1  | 2.709487000                 | 3.132888000  | 1.787180000  |
| 1 | -1.235538000 | 2.126990000  | 0.415087000  | 1  | 3.416676000                 | 4.096286000  | 0.500384000  |
| 1 | -2.087657000 | 3.976331000  | 1.853743000  | 1  | 0.132391000                 | -1.980872000 | 1.247450000  |
| 1 | -3.734439000 | 3.576157000  | 1.382795000  | 1  | 0.154850000                 | -2.202148000 | 0.289059000  |
| 1 | -2.782195000 | 2.427233000  | 2.318698000  | 32 | -0.013513000                | -0.692129000 | -0.711756000 |
| 1 | -1.378804000 | 4.381915000  | -0.558169000 |    |                             |              |              |
| 1 | -3.033779000 | 4.106897000  | -1.056196000 |    | Ge-intra-IM <sub>1,4'</sub> |              |              |
| 1 | -1.734654000 | 3.187538000  | -1.802303000 | 7  | 1.446730000                 | -0.279352000 | 0.484072000  |
| 1 | -4.689903000 | 2.674412000  | -0.841452000 | 6  | 1.276319000                 | -0.421741000 | 1.754159000  |

|   |              |              |              |    |                                  |              |              |
|---|--------------|--------------|--------------|----|----------------------------------|--------------|--------------|
| 6 | 0.016719000  | -1.078240000 | 2.243247000  | 1  | -6.238036000                     | 0.851092000  | -1.418505000 |
| 6 | -1.298445000 | -0.462487000 | 1.812085000  | 1  | -5.544186000                     | -1.474658000 | -1.116095000 |
| 7 | -1.403394000 | -0.271656000 | 0.444496000  | 1  | -2.222126000                     | -2.471300000 | 0.235509000  |
| 6 | -2.720828000 | 0.053756000  | -0.074058000 | 1  | -3.832888000                     | -4.211835000 | 0.891515000  |
| 6 | -3.108337000 | 1.383297000  | -0.263357000 | 1  | -5.172602000                     | -3.231036000 | 0.323027000  |
| 6 | -2.167537000 | 2.539813000  | 0.045379000  | 1  | -4.214829000                     | -2.694819000 | 1.699416000  |
| 6 | -2.661423000 | 3.345790000  | 1.266562000  | 1  | -2.805064000                     | -4.189059000 | -1.448374000 |
| 6 | -2.005530000 | 3.465670000  | -1.178998000 | 1  | -4.080243000                     | -3.152586000 | -2.076039000 |
| 6 | -4.383187000 | 1.649975000  | -0.743214000 | 1  | -2.398569000                     | -2.658789000 | -2.214898000 |
| 6 | -5.257611000 | 0.627839000  | -1.045468000 | 1  | -3.220274000                     | 0.161330000  | 2.471570000  |
| 6 | -4.864622000 | -0.682909000 | -0.871289000 | 1  | -2.040659000                     | -0.408507000 | 3.787383000  |
| 6 | -3.603691000 | -0.989107000 | -0.383269000 | 1  | 2.547084000                      | -0.981895000 | 3.357332000  |
| 6 | -3.203578000 | -2.450075000 | -0.206387000 | 1  | 3.203746000                      | 0.350698000  | 2.371298000  |
| 6 | -4.172126000 | -3.192019000 | 0.738052000  | 1  | 1.845141000                      | 0.624728000  | 3.502522000  |
| 6 | -3.118334000 | -3.157724000 | -1.576349000 | 1  | 4.548877000                      | 2.785079000  | -0.998591000 |
| 6 | -2.242665000 | -0.212946000 | 2.741832000  | 1  | 6.196107000                      | 1.038915000  | -1.449254000 |
| 6 | 2.298358000  | -0.076362000 | 2.793547000  | 1  | 5.630252000                      | -1.307751000 | -1.070962000 |
| 6 | 2.754177000  | 0.106900000  | -0.061349000 | 1  | 2.372877000                      | -2.470314000 | 0.314241000  |
| 6 | 3.041196000  | 1.445991000  | -0.316058000 | 1  | 4.071096000                      | -4.134547000 | 0.891266000  |
| 6 | 4.299737000  | 1.761311000  | -0.808192000 | 1  | 5.351539000                      | -3.121783000 | 0.253878000  |
| 6 | 5.230045000  | 0.776700000  | -1.065818000 | 1  | 4.474268000                      | -2.619541000 | 1.690014000  |
| 6 | 4.911088000  | -0.547017000 | -0.845713000 | 1  | 2.959513000                      | -4.118029000 | -1.417023000 |
| 6 | 3.670419000  | -0.909122000 | -0.342377000 | 1  | 2.455881000                      | -2.593574000 | -2.133438000 |
| 6 | 3.337409000  | -2.388108000 | -0.159573000 | 1  | 4.163552000                      | -3.016628000 | -2.076185000 |
| 6 | 4.376883000  | -3.106990000 | 0.726302000  | 1  | 1.082330000                      | 2.099495000  | 0.188451000  |
| 6 | 3.223741000  | -3.073087000 | -1.539571000 | 1  | 1.036799000                      | 4.111535000  | -1.231342000 |
| 6 | 2.020208000  | 2.554574000  | -0.088808000 | 1  | 1.447531000                      | 2.690071000  | -2.180396000 |
| 6 | 1.788719000  | 3.349170000  | -1.392143000 | 1  | 2.698811000                      | 3.838977000  | -1.716588000 |
| 6 | 2.465836000  | 3.499157000  | 1.048557000  | 1  | 1.709964000                      | 4.258049000  | 1.219721000  |
| 1 | 0.042993000  | -1.150891000 | 3.331125000  | 1  | 2.618733000                      | 2.957012000  | 1.974427000  |
| 1 | -1.206494000 | 2.112737000  | 0.281041000  | 1  | 3.393312000                      | 3.997062000  | 0.790165000  |
| 1 | -1.970390000 | 4.153811000  | 1.488647000  | 1  | 0.052394000                      | -2.098066000 | 1.822202000  |
| 1 | -3.635442000 | 3.779494000  | 1.068837000  | 1  | 0.095313000                      | -2.198515000 | -0.467152000 |
| 1 | -2.735943000 | 2.708280000  | 2.137716000  | 32 | -0.056803000                     | -0.655952000 | -0.859488000 |
| 1 | -1.302048000 | 4.260267000  | -0.955268000 |    |                                  |              |              |
| 1 | -2.948791000 | 3.926210000  | -1.447031000 |    | <i>Ge-intra-TS<sub>q,4</sub></i> |              |              |
| 1 | -1.639333000 | 2.908868000  | -2.032977000 | 7  | -1.414112000                     | -0.187551000 | 0.531316000  |
| 1 | -4.693502000 | 2.665851000  | -0.883923000 | 6  | -1.270057000                     | -0.289075000 | 1.845791000  |

|   |              |              |              |    |                               |              |              |
|---|--------------|--------------|--------------|----|-------------------------------|--------------|--------------|
| 6 | -0.013537000 | -0.429512000 | 2.468577000  | 1  | 6.193973000                   | 0.665070000  | -1.661929000 |
| 6 | 1.323128000  | -0.297331000 | 1.807089000  | 1  | 4.718062000                   | 2.549268000  | -1.174873000 |
| 7 | 1.441366000  | -0.210860000 | 0.498815000  | 1  | 1.298522000                   | 2.182432000  | 0.253074000  |
| 6 | 2.752651000  | 0.043104000  | -0.088976000 | 1  | 2.205715000                   | 4.297716000  | 1.193907000  |
| 6 | 3.582160000  | -1.045390000 | -0.376136000 | 1  | 3.821706000                   | 3.847913000  | 0.673745000  |
| 6 | 3.172171000  | -2.483106000 | -0.067510000 | 1  | 3.003555000                   | 2.908872000  | 1.916835000  |
| 6 | 4.053713000  | -3.066628000 | 1.058559000  | 1  | 1.304411000                   | 4.182460000  | -1.173312000 |
| 6 | 3.238482000  | -3.370420000 | -1.328573000 | 1  | 2.915341000                   | 3.805508000  | -1.755300000 |
| 6 | 4.823030000  | -0.796874000 | -0.944451000 | 1  | 1.567047000                   | 2.746627000  | -2.154274000 |
| 6 | 5.230156000  | 0.490449000  | -1.225612000 | 1  | 3.235862000                   | 0.498345000  | 2.473311000  |
| 6 | 4.395411000  | 1.553087000  | -0.949276000 | 1  | 2.168341000                   | -0.260659000 | 3.779818000  |
| 6 | 3.144165000  | 1.351626000  | -0.384550000 | 1  | -2.836060000                  | 0.798474000  | 2.814787000  |
| 6 | 2.248514000  | 2.553430000  | -0.097479000 | 1  | -3.294049000                  | -0.835122000 | 2.365314000  |
| 6 | 2.862917000  | 3.456990000  | 0.994623000  | 1  | -2.213330000                  | -0.564290000 | 3.753814000  |
| 6 | 1.994940000  | 3.372186000  | -1.381931000 | 1  | -5.372324000                  | -1.672337000 | -1.270535000 |
| 6 | 2.262949000  | 0.131024000  | 2.771643000  | 1  | -6.168517000                  | 0.601966000  | -1.667615000 |
| 6 | -2.474458000 | -0.229966000 | 2.748664000  | 1  | -4.763815000                  | 2.512152000  | -1.080046000 |
| 6 | -2.729578000 | 0.029552000  | -0.062505000 | 1  | -1.353509000                  | 2.205854000  | 0.378081000  |
| 6 | -3.516128000 | -1.073763000 | -0.416517000 | 1  | -2.327603000                  | 4.269936000  | 1.344728000  |
| 6 | -4.755993000 | -0.841025000 | -0.994389000 | 1  | -3.918177000                  | 3.821128000  | 0.750499000  |
| 6 | -5.206223000 | 0.441970000  | -1.222691000 | 1  | -3.150427000                  | 2.865519000  | 2.005417000  |
| 6 | -4.412492000 | 1.518663000  | -0.888067000 | 1  | -1.384868000                  | 4.225499000  | -1.018951000 |
| 6 | -3.162965000 | 1.335072000  | -0.314284000 | 1  | -1.576417000                  | 2.793404000  | -2.021030000 |
| 6 | -2.305992000 | 2.554973000  | 0.012586000  | 1  | -2.967909000                  | 3.805657000  | -1.648737000 |
| 6 | -2.969411000 | 3.430249000  | 1.099166000  | 1  | -2.088565000                  | -2.501010000 | 0.269371000  |
| 6 | -2.044554000 | 3.397344000  | -1.255190000 | 1  | -2.551773000                  | -4.257167000 | -1.392444000 |
| 6 | -3.058817000 | -2.516445000 | -0.201419000 | 1  | -2.194266000                  | -2.729370000 | -2.182804000 |
| 6 | -2.908214000 | -3.245281000 | -1.555243000 | 1  | -3.858854000                  | -3.299127000 | -2.073173000 |
| 6 | -4.037118000 | -3.292463000 | 0.708964000  | 1  | -3.657295000                  | -4.292661000 | 0.888563000  |
| 1 | 0.001120000  | -0.941040000 | 3.426642000  | 1  | -4.164373000                  | -2.801542000 | 1.666304000  |
| 1 | 2.147992000  | -2.476036000 | 0.268149000  | 1  | -5.011218000                  | -3.382770000 | 0.243284000  |
| 1 | 3.730776000  | -4.073737000 | 1.302393000  | 1  | 0.811107000                   | 0.675556000  | 2.897024000  |
| 1 | 5.091942000  | -3.109329000 | 0.749322000  | 1  | 0.005745000                   | 0.890824000  | -1.368623000 |
| 1 | 3.986811000  | -2.457571000 | 1.951941000  | 32 | -0.002615000                  | -0.575069000 | -0.794573000 |
| 1 | 2.889449000  | -4.370439000 | -1.092807000 |    |                               |              |              |
| 1 | 4.252278000  | -3.448599000 | -1.703345000 |    | Ge-inter-TS <sub>4,4</sub> -I |              |              |
| 1 | 2.608081000  | -2.964052000 | -2.109626000 | 7  | 3.726732000                   | 0.500634000  | -0.944616000 |
| 1 | 5.475328000  | -1.616880000 | -1.166659000 | 6  | 2.539267000                   | 0.353325000  | -1.423776000 |



|   |             |              |              |   |              |              |              |
|---|-------------|--------------|--------------|---|--------------|--------------|--------------|
| 6 | 1.382086000 | 0.438565000  | -0.475073000 | 1 | 2.667277000  | -2.947787000 | 6.145305000  |
| 6 | 1.393433000 | -0.481062000 | 0.721679000  | 1 | 2.147588000  | -0.561751000 | 6.066094000  |
| 7 | 2.474219000 | -0.404113000 | 1.499848000  | 1 | 1.806471000  | 1.383952000  | 2.914229000  |
| 6 | 2.517194000 | -1.132422000 | 2.767940000  | 1 | 0.377189000  | 2.418356000  | 4.592702000  |
| 6 | 2.838397000 | -2.491549000 | 2.803336000  | 1 | 0.755204000  | 1.171269000  | 5.765547000  |
| 6 | 3.173457000 | -3.289484000 | 1.548774000  | 1 | -0.174451000 | 0.767358000  | 4.330683000  |
| 6 | 2.192683000 | -4.463281000 | 1.335667000  | 1 | 4.026398000  | 1.712893000  | 3.966004000  |
| 6 | 4.622735000 | -3.816693000 | 1.629014000  | 1 | 2.891158000  | 2.942167000  | 4.506279000  |
| 6 | 2.877488000 | -3.128385000 | 4.034971000  | 1 | 3.298117000  | 1.592639000  | 5.559214000  |
| 6 | 2.627092000 | -2.439080000 | 5.202536000  | 1 | 0.262471000  | -1.958037000 | 1.765843000  |
| 6 | 2.331194000 | -1.093796000 | 5.155043000  | 1 | -0.255536000 | -1.601002000 | 0.059163000  |
| 6 | 2.265623000 | -0.420217000 | 3.944203000  | 1 | 1.553323000  | 1.050940000  | -3.159168000 |
| 6 | 1.942602000 | 1.071318000  | 3.936980000  | 1 | 3.079622000  | 0.192121000  | -3.513298000 |
| 6 | 0.640458000 | 1.372010000  | 4.707262000  | 1 | 1.607859000  | -0.694498000 | -3.005042000 |
| 6 | 3.117191000 | 1.881240000  | 4.530428000  | 1 | 7.373818000  | -0.926421000 | -3.373388000 |
| 6 | 0.232138000 | -1.232377000 | 0.959446000  | 1 | 7.815101000  | 1.324181000  | -4.207283000 |
| 6 | 2.201954000 | 0.215663000  | -2.873264000 | 1 | 6.421345000  | 3.195834000  | -3.486509000 |
| 6 | 4.877625000 | 0.708592000  | -1.837209000 | 1 | 3.455356000  | 2.862447000  | -1.263382000 |
| 6 | 5.692192000 | -0.363036000 | -2.195282000 | 1 | 3.150636000  | 4.845956000  | -2.642252000 |
| 6 | 6.743922000 | -0.117318000 | -3.066753000 | 1 | 4.613607000  | 4.513749000  | -3.546799000 |
| 6 | 6.995975000 | 1.153730000  | -3.537403000 | 1 | 3.228673000  | 3.444877000  | -3.702110000 |
| 6 | 6.203806000 | 2.208431000  | -3.134772000 | 1 | 4.570237000  | 4.923421000  | -0.504123000 |
| 6 | 5.130865000 | 2.010149000  | -2.278827000 | 1 | 5.470118000  | 3.498305000  | -0.002441000 |
| 6 | 4.309981000 | 3.213467000  | -1.818870000 | 1 | 6.035738000  | 4.460988000  | -1.361672000 |
| 6 | 3.795239000 | 4.053735000  | -3.006904000 | 1 | 4.729184000  | -1.724068000 | -0.876346000 |
| 6 | 5.154395000 | 4.081123000  | -0.858771000 | 1 | 6.580897000  | -3.320818000 | -0.631725000 |
| 6 | 5.467553000 | -1.773535000 | -1.662181000 | 1 | 7.132459000  | -1.692421000 | -0.264525000 |
| 6 | 6.767463000 | -2.340744000 | -1.051491000 | 1 | 7.540306000  | -2.443188000 | -1.802935000 |
| 6 | 4.942247000 | -2.705640000 | -2.775960000 | 1 | 4.759699000  | -3.698158000 | -2.378363000 |
| 1 | 0.435472000 | 0.339950000  | -1.008311000 | 1 | 4.016234000  | -2.333513000 | -3.198249000 |
| 1 | 3.103152000 | -2.627361000 | 0.699786000  | 1 | 5.669604000  | -2.788404000 | -3.575217000 |
| 1 | 2.433196000 | -4.983304000 | 0.413999000  | 1 | 1.436570000  | 1.461005000  | -0.061005000 |
| 1 | 2.264248000 | -5.175333000 | 2.149342000  | 1 | 3.308234000  | 2.012505000  | 1.042812000  |
| 1 | 1.170339000 | -4.115645000 | 1.272490000  | 7 | -3.162673000 | 1.404208000  | 0.297060000  |
| 1 | 4.874872000 | -4.352549000 | 0.720299000  | 6 | -2.784357000 | 0.902795000  | 1.466980000  |
| 1 | 4.736159000 | -4.500178000 | 2.461618000  | 6 | -2.334287000 | -0.438980000 | 1.623915000  |
| 1 | 5.321722000 | -2.999749000 | 1.758749000  | 6 | -2.816314000 | -1.604573000 | 0.827809000  |
| 1 | 3.113123000 | -4.172101000 | 4.080747000  | 7 | -3.344127000 | -1.338153000 | -0.431554000 |

|   |              |              |              |    |                      |              |              |
|---|--------------|--------------|--------------|----|----------------------|--------------|--------------|
| 6 | -3.936810000 | -2.439667000 | -1.161304000 | 1  | 0.249247000          | -3.801945000 | -2.113787000 |
| 6 | -5.284573000 | -2.770211000 | -0.964595000 | 1  | -1.009916000         | -4.897669000 | -2.657144000 |
| 6 | -6.153942000 | -1.994849000 | 0.016006000  | 1  | -0.952844000         | -4.392922000 | -0.971598000 |
| 6 | -6.449015000 | -2.839974000 | 1.274633000  | 1  | -0.418782000         | -2.112261000 | -3.906583000 |
| 6 | -7.474503000 | -1.534433000 | -0.637023000 | 1  | -1.735139000         | -3.126920000 | -4.473488000 |
| 6 | -5.831445000 | -3.830228000 | -1.671231000 | 1  | -2.062227000         | -1.479334000 | -3.953098000 |
| 6 | -5.076433000 | -4.552504000 | -2.572544000 | 1  | -2.979678000         | -3.733960000 | 0.840628000  |
| 6 | -3.754383000 | -4.219901000 | -2.772545000 | 1  | -2.295902000         | -2.947100000 | 2.378172000  |
| 6 | -3.168447000 | -3.174888000 | -2.072191000 | 1  | -2.218850000         | 2.711225000  | 2.519368000  |
| 6 | -1.697574000 | -2.855050000 | -2.310194000 | 1  | -3.807034000         | 2.087497000  | 2.920307000  |
| 6 | -0.797545000 | -4.068176000 | -1.992808000 | 1  | -2.368700000         | 1.266646000  | 3.546329000  |
| 6 | -1.466019000 | -2.361621000 | -3.754670000 | 1  | -6.232275000         | 4.820652000  | 0.180747000  |
| 6 | -2.680387000 | -2.840444000 | 1.370328000  | 1  | -4.498025000         | 6.519026000  | -0.100069000 |
| 6 | -2.780988000 | 1.792095000  | 2.686507000  | 1  | -2.153707000         | 5.851491000  | -0.275172000 |
| 6 | -3.532908000 | 2.807527000  | 0.178255000  | 1  | -0.967864000         | 2.346259000  | 0.071352000  |
| 6 | -4.878484000 | 3.177726000  | 0.226040000  | 1  | 0.888172000          | 3.853933000  | 0.613015000  |
| 6 | -5.204044000 | 4.523987000  | 0.133613000  | 1  | -0.129886000         | 5.263352000  | 0.404119000  |
| 6 | -4.228808000 | 5.483584000  | -0.029143000 | 1  | -0.424176000         | 4.161662000  | 1.739419000  |
| 6 | -2.905541000 | 5.104188000  | -0.120376000 | 1  | 0.366279000          | 3.266339000  | -1.829167000 |
| 6 | -2.537634000 | 3.771332000  | -0.023125000 | 1  | -1.290434000         | 2.881444000  | -2.296180000 |
| 6 | -1.072139000 | 3.385283000  | -0.195517000 | 1  | -0.817070000         | 4.552363000  | -2.015548000 |
| 6 | -0.130213000 | 4.220838000  | 0.697972000  | 1  | -5.544208000         | 1.167931000  | 0.337376000  |
| 6 | -0.677940000 | 3.530413000  | -1.683145000 | 1  | -7.702795000         | 1.488621000  | -0.831974000 |
| 6 | -5.995104000 | 2.146663000  | 0.335780000  | 1  | -6.361473000         | 2.079022000  | -1.803976000 |
| 6 | -6.925653000 | 2.240609000  | -0.893816000 | 1  | -7.400658000         | 3.213252000  | -0.947667000 |
| 6 | -6.802060000 | 2.320622000  | 1.640274000  | 1  | -7.561996000         | 1.549772000  | 1.713271000  |
| 1 | -2.218299000 | -0.709944000 | 2.671484000  | 1  | -6.160133000         | 2.246698000  | 2.510336000  |
| 1 | -5.594253000 | -1.122217000 | 0.309721000  | 1  | -7.295947000         | 3.285388000  | 1.663725000  |
| 1 | -7.047971000 | -2.269991000 | 1.979277000  | 1  | -0.891838000         | -0.502438000 | 1.283921000  |
| 1 | -7.000103000 | -3.735738000 | 1.008135000  | 1  | -1.468390000         | 0.260465000  | -1.130080000 |
| 1 | -5.525695000 | -3.127744000 | 1.758177000  | 32 | 4.076080000          | 0.619557000  | 1.065714000  |
| 1 | -8.027080000 | -0.903469000 | 0.052228000  | 32 | -3.052025000         | 0.313986000  | -1.381309000 |
| 1 | -8.104897000 | -2.380064000 | -0.885971000 |    |                      |              |              |
| 1 | -7.280924000 | -0.972184000 | -1.542333000 |    | Ge-inter- $IM_{4,4}$ |              |              |
| 1 | -6.859085000 | -4.092717000 | -1.518821000 | 7  | 3.158026000          | -1.415665000 | -0.412643000 |
| 1 | -5.516802000 | -5.366447000 | -3.114805000 | 6  | 2.428403000          | -1.526668000 | 0.739886000  |
| 1 | -3.169898000 | -4.779808000 | -3.475725000 | 6  | 1.723761000          | -0.486393000 | 1.294867000  |
| 1 | -1.432580000 | -2.057555000 | -1.638568000 | 7  | 2.804164000          | 1.367488000  | 0.118932000  |

|   |             |              |              |   |              |              |              |
|---|-------------|--------------|--------------|---|--------------|--------------|--------------|
| 6 | 3.414583000 | 2.662695000  | 0.309577000  | 1 | 0.566941000  | 4.448662000  | -2.715937000 |
| 6 | 4.234603000 | 2.895577000  | 1.432152000  | 1 | 1.676620000  | 5.611069000  | -2.017858000 |
| 6 | 4.509348000 | 1.815323000  | 2.473512000  | 1 | 3.932697000  | 2.831233000  | -3.154870000 |
| 6 | 3.859046000 | 2.168260000  | 3.829275000  | 1 | 2.533685000  | 3.456980000  | -4.017868000 |
| 6 | 6.026964000 | 1.602247000  | 2.666097000  | 1 | 3.659948000  | 4.568501000  | -3.250792000 |
| 6 | 4.825624000 | 4.135821000  | 1.600708000  | 1 | 1.619886000  | -2.867815000 | 2.215809000  |
| 6 | 4.653269000 | 5.146067000  | 0.676378000  | 1 | 2.034383000  | -3.659752000 | 0.674452000  |
| 6 | 3.867748000 | 4.916545000  | -0.428452000 | 1 | 3.305435000  | -3.198052000 | 1.786700000  |
| 6 | 3.231800000 | 3.695747000  | -0.621564000 | 1 | 7.041169000  | -3.883438000 | -0.484560000 |
| 6 | 2.345417000 | 3.541288000  | -1.852716000 | 1 | 6.139048000  | -5.458467000 | -2.121032000 |
| 6 | 1.244864000 | 4.626492000  | -1.885861000 | 1 | 3.896824000  | -5.116377000 | -3.031132000 |
| 6 | 3.175748000 | 3.603099000  | -3.153825000 | 1 | 1.607634000  | -2.417157000 | -1.902369000 |
| 6 | 2.335223000 | -2.889637000 | 1.390849000  | 1 | 0.273606000  | -4.249163000 | -2.902118000 |
| 6 | 3.980169000 | -2.516413000 | -0.873517000 | 1 | 1.710184000  | -5.220339000 | -3.122630000 |
| 6 | 5.287059000 | -2.678084000 | -0.399420000 | 1 | 1.144934000  | -4.867291000 | -1.499407000 |
| 6 | 6.042951000 | -3.750864000 | -0.851091000 | 1 | 1.312048000  | -2.449305000 | -4.373348000 |
| 6 | 5.540114000 | -4.637190000 | -1.778820000 | 1 | 2.824036000  | -1.686896000 | -3.894272000 |
| 6 | 4.271203000 | -4.445707000 | -2.283896000 | 1 | 2.830428000  | -3.327371000 | -4.531047000 |
| 6 | 3.481435000 | -3.393037000 | -1.847206000 | 1 | 5.189654000  | -0.917819000 | 0.779329000  |
| 6 | 2.113053000 | -3.172588000 | -2.481034000 | 1 | 7.557365000  | -0.230875000 | 0.486276000  |
| 6 | 1.259807000 | -4.459051000 | -2.497823000 | 1 | 6.759955000  | -0.473412000 | -1.062966000 |
| 6 | 2.281950000 | -2.623262000 | -3.915653000 | 1 | 7.871903000  | -1.688654000 | -0.441148000 |
| 6 | 5.926957000 | -1.669210000 | 0.546535000  | 1 | 6.817125000  | -1.583304000 | 2.523607000  |
| 6 | 7.107779000 | -0.970599000 | -0.166067000 | 1 | 5.580021000  | -2.821038000 | 2.367312000  |
| 6 | 6.401679000 | -2.331238000 | 1.857595000  | 1 | 7.169651000  | -3.071264000 | 1.663154000  |
| 1 | 1.114257000 | -0.732911000 | 2.161190000  | 1 | 1.599226000  | 0.084208000  | -1.720833000 |
| 1 | 4.081324000 | 0.893675000  | 2.116203000  | 7 | -2.945629000 | -1.453765000 | 0.631495000  |
| 1 | 4.035312000 | 1.372638000  | 4.547627000  | 6 | -1.784274000 | -1.399371000 | 0.072396000  |
| 1 | 4.283994000 | 3.083443000  | 4.227873000  | 6 | -1.898056000 | 1.096577000  | -0.629072000 |
| 1 | 2.792735000 | 2.298993000  | 3.711882000  | 7 | -3.086468000 | 1.314612000  | -0.178567000 |
| 1 | 6.201351000 | 0.758725000  | 3.326603000  | 6 | -3.818969000 | 2.547264000  | -0.517760000 |
| 1 | 6.491349000 | 2.473946000  | 3.112215000  | 6 | -4.707356000 | 2.539940000  | -1.592320000 |
| 1 | 6.510642000 | 1.406714000  | 1.718453000  | 6 | -4.938714000 | 1.299624000  | -2.448877000 |
| 1 | 5.441317000 | 4.312140000  | 2.459974000  | 6 | -4.272036000 | 1.464042000  | -3.832863000 |
| 1 | 5.130072000 | 6.096592000  | 0.816558000  | 6 | -6.443761000 | 0.999063000  | -2.611151000 |
| 1 | 3.737314000 | 5.697242000  | -1.151184000 | 6 | -5.384468000 | 3.714524000  | -1.883056000 |
| 1 | 1.870331000 | 2.575170000  | -1.799098000 | 6 | -5.204064000 | 4.846174000  | -1.114982000 |
| 1 | 0.675329000 | 4.631362000  | -0.964326000 | 6 | -4.343618000 | 4.821610000  | -0.038205000 |

|   |              |              |              |    |                                     |              |              |
|---|--------------|--------------|--------------|----|-------------------------------------|--------------|--------------|
| 6 | -3.631522000 | 3.674753000  | 0.283957000  | 1  | -5.145861000                        | -6.044915000 | 2.086733000  |
| 6 | -2.712682000 | 3.678636000  | 1.504485000  | 1  | -3.698122000                        | -4.833928000 | 3.636007000  |
| 6 | -1.734581000 | 4.872120000  | 1.490704000  | 1  | -1.947696000                        | -1.651828000 | 2.808869000  |
| 6 | -3.563326000 | 3.692635000  | 2.794952000  | 1  | -0.648856000                        | -2.809319000 | 4.512223000  |
| 6 | -0.985112000 | -2.590980000 | -0.329715000 | 1  | -1.704147000                        | -4.206711000 | 4.449521000  |
| 6 | -3.553459000 | -2.739146000 | 1.015079000  | 1  | -0.692878000                        | -3.810491000 | 3.068256000  |
| 6 | -4.401618000 | -3.398470000 | 0.127644000  | 1  | -2.673125000                        | -1.378295000 | 5.150040000  |
| 6 | -4.960684000 | -4.600756000 | 0.535499000  | 1  | -4.043907000                        | -1.256883000 | 4.056610000  |
| 6 | -4.702473000 | -5.115992000 | 1.788229000  | 1  | -3.785001000                        | -2.731032000 | 4.977900000  |
| 6 | -3.881609000 | -4.432734000 | 2.660731000  | 1  | -4.273967000                        | -1.875723000 | -1.353669000 |
| 6 | -3.290907000 | -3.232012000 | 2.295256000  | 1  | -6.488380000                        | -2.227656000 | -2.374076000 |
| 6 | -2.414380000 | -2.489478000 | 3.302270000  | 1  | -6.642311000                        | -1.989812000 | -0.637094000 |
| 6 | -1.295615000 | -3.391501000 | 3.865204000  | 1  | -6.781344000                        | -3.601630000 | -1.327110000 |
| 6 | -3.288310000 | -1.928100000 | 4.446427000  | 1  | -4.403920000                        | -3.335553000 | -3.341485000 |
| 6 | -4.738193000 | -2.845204000 | -1.252595000 | 1  | -3.126854000                        | -3.909743000 | -2.277300000 |
| 6 | -6.262983000 | -2.653983000 | -1.403685000 | 1  | -4.671949000                        | -4.739179000 | -2.322355000 |
| 6 | -4.196796000 | -3.766609000 | -2.367891000 | 1  | -2.839149000                        | 0.524039000  | 2.187918000  |
| 1 | -4.488721000 | 0.456348000  | -1.946922000 | 6  | 1.822957000                         | 0.953028000  | 1.017657000  |
| 1 | -4.414472000 | 0.568513000  | -4.428493000 | 6  | 0.981652000                         | 1.816831000  | 1.663806000  |
| 1 | -4.712376000 | 2.299255000  | -4.364709000 | 1  | 1.070771000                         | 2.887793000  | 1.531795000  |
| 1 | -3.208550000 | 1.647073000  | -3.739521000 | 1  | 0.337161000                         | 1.456714000  | 2.461669000  |
| 1 | -6.575860000 | 0.078499000  | -3.167423000 | 6  | -1.115375000                        | -0.082127000 | -0.145970000 |
| 1 | -6.944514000 | 1.788444000  | -3.157250000 | 1  | -0.214973000                        | -0.207796000 | -0.756492000 |
| 1 | -6.920142000 | 0.890308000  | -1.644703000 | 1  | -0.715146000                        | 0.247822000  | 0.836754000  |
| 1 | -6.060125000 | 3.743758000  | -2.712623000 | 32 | -4.005412000                        | 0.160346000  | 1.186967000  |
| 1 | -5.738490000 | 5.744361000  | -1.352435000 | 32 | 3.193064000                         | 0.250506000  | -1.424491000 |
| 1 | -4.220732000 | 5.701247000  | 0.558824000  | 6  | -1.129023000                        | 2.016516000  | -1.506532000 |
| 1 | -2.122835000 | 2.776012000  | 1.505465000  | 1  | -0.240189000                        | 2.307292000  | -0.930396000 |
| 1 | -1.047496000 | 4.786053000  | 2.324476000  | 1  | -0.754379000                        | 1.467125000  | -2.376082000 |
| 1 | -2.259404000 | 5.814879000  | 1.585719000  | 1  | -1.693506000                        | 2.894511000  | -1.806341000 |
| 1 | -1.154125000 | 4.891413000  | 0.577369000  |    |                                     |              |              |
| 1 | -2.918303000 | 3.665496000  | 3.666174000  |    | <b>Ge-inter-TS<sub>4,4</sub>-II</b> |              |              |
| 1 | -4.168460000 | 4.590343000  | 2.842305000  | 7  | -2.547146000                        | -1.574075000 | 0.715038000  |
| 1 | -4.222992000 | 2.834123000  | 2.831358000  | 6  | -1.493960000                        | -1.373479000 | -0.024861000 |
| 1 | 0.057634000  | -2.422474000 | -0.041140000 | 6  | -1.165788000                        | -0.028662000 | -0.528616000 |
| 1 | -1.367261000 | -3.519524000 | 0.085305000  | 6  | -2.228092000                        | 0.888016000  | -0.982718000 |
| 1 | -0.990675000 | -2.647759000 | -1.423647000 | 7  | -3.367217000                        | 0.960818000  | -0.368469000 |
| 1 | -5.606810000 | -5.134296000 | -0.130874000 | 6  | -4.379262000                        | 1.962401000  | -0.740950000 |

|   |              |              |              |   |              |              |              |
|---|--------------|--------------|--------------|---|--------------|--------------|--------------|
| 6 | -5.328412000 | 1.661964000  | -1.718097000 | 1 | -1.969610000 | 5.027027000  | 1.622739000  |
| 6 | -5.378020000 | 0.315515000  | -2.432646000 | 1 | -3.461428000 | 5.690427000  | 0.987286000  |
| 6 | -5.011171000 | 0.466224000  | -3.925776000 | 1 | -4.559085000 | 2.470013000  | 2.595402000  |
| 6 | -6.774792000 | -0.327651000 | -2.291635000 | 1 | -3.428602000 | 3.655743000  | 3.229697000  |
| 6 | -6.265932000 | 2.633053000  | -2.038698000 | 1 | -4.924029000 | 4.183635000  | 2.465107000  |
| 6 | -6.279337000 | 3.850004000  | -1.391340000 | 1 | -2.531290000 | 2.590585000  | -2.283900000 |
| 6 | -5.353942000 | 4.115540000  | -0.404560000 | 1 | -1.738114000 | 1.171228000  | -3.023571000 |
| 6 | -4.386836000 | 3.182751000  | -0.058993000 | 1 | 0.322192000  | -2.120130000 | -0.875750000 |
| 6 | -3.402735000 | 3.507588000  | 1.063366000  | 1 | -0.307467000 | -3.102467000 | 0.464325000  |
| 6 | -2.741364000 | 4.889151000  | 0.873833000  | 1 | -1.106082000 | -3.162125000 | -1.102668000 |
| 6 | -4.128216000 | 3.448907000  | 2.427359000  | 1 | -4.384721000 | -5.799758000 | 0.628731000  |
| 6 | -1.830391000 | 1.777514000  | -2.116537000 | 1 | -3.518699000 | -6.327671000 | 2.848950000  |
| 6 | -0.581261000 | -2.503194000 | -0.405801000 | 1 | -2.263456000 | -4.651837000 | 4.104944000  |
| 6 | -2.823189000 | -2.899158000 | 1.290604000  | 1 | -1.318057000 | -1.313708000 | 2.779703000  |
| 6 | -3.582066000 | -3.828317000 | 0.579478000  | 1 | 0.215559000  | -1.906178000 | 4.555618000  |
| 6 | -3.812394000 | -5.067426000 | 1.160350000  | 1 | -0.575178000 | -3.446054000 | 4.824393000  |
| 6 | -3.328667000 | -5.365966000 | 2.415542000  | 1 | 0.312148000  | -3.164644000 | 3.335283000  |
| 6 | -2.614920000 | -4.420094000 | 3.121021000  | 1 | -2.045016000 | -0.817359000 | 5.091958000  |
| 6 | -2.350587000 | -3.171393000 | 2.578749000  | 1 | -3.433634000 | -1.122027000 | 4.060046000  |
| 6 | -1.609519000 | -2.132283000 | 3.418010000  | 1 | -2.879337000 | -2.366273000 | 5.169154000  |
| 6 | -0.334533000 | -2.705336000 | 4.071761000  | 1 | -3.922386000 | -2.521277000 | -1.067940000 |
| 6 | -2.555997000 | -1.572981000 | 4.505384000  | 1 | -6.206484000 | -3.319853000 | -1.607599000 |
| 6 | -4.209839000 | -3.520307000 | -0.775903000 | 1 | -6.089718000 | -2.836266000 | 0.081113000  |
| 6 | -5.749970000 | -3.555164000 | -0.653726000 | 1 | -6.086296000 | -4.539901000 | -0.353450000 |
| 6 | -3.740910000 | -4.506599000 | -1.867910000 | 1 | -4.165398000 | -4.227242000 | -2.826263000 |
| 1 | -0.360754000 | -0.085813000 | -1.265921000 | 1 | -2.662126000 | -4.512224000 | -1.961991000 |
| 1 | -4.662840000 | -0.343802000 | -1.964288000 | 1 | -4.064259000 | -5.515004000 | -1.640637000 |
| 1 | -5.012878000 | -0.503672000 | -4.411915000 | 1 | -0.602816000 | 0.611532000  | 0.337208000  |
| 1 | -5.732559000 | 1.098010000  | -4.430346000 | 1 | -2.668668000 | 0.578260000  | 2.024793000  |
| 1 | -4.031096000 | 0.909480000  | -4.049925000 | 1 | -0.833557000 | 2.170298000  | -1.902418000 |
| 1 | -6.781094000 | -1.303486000 | -2.762969000 | 7 | 3.462181000  | -1.072466000 | -0.524973000 |
| 1 | -7.531808000 | 0.278010000  | -2.773636000 | 6 | 2.664985000  | -1.422250000 | 0.513922000  |
| 1 | -7.039056000 | -0.444978000 | -1.248300000 | 6 | 1.710138000  | -0.579941000 | 1.050459000  |
| 1 | -6.995137000 | 2.432032000  | -2.796294000 | 6 | 1.569445000  | 0.853563000  | 0.888994000  |
| 1 | -7.014072000 | 4.586432000  | -1.649586000 | 7 | 2.491755000  | 1.526763000  | 0.118539000  |
| 1 | -5.381117000 | 5.057022000  | 0.103570000  | 6 | 2.821640000  | 2.895886000  | 0.449472000  |
| 1 | -2.621182000 | 2.764608000  | 1.070274000  | 6 | 3.518079000  | 3.176131000  | 1.639834000  |
| 1 | -2.284499000 | 4.974357000  | -0.103649000 | 6 | 3.942228000  | 2.076977000  | 2.608999000  |

|   |              |              |              |    |                                  |              |              |
|---|--------------|--------------|--------------|----|----------------------------------|--------------|--------------|
| 6 | 3.164062000  | 2.177494000  | 3.939264000  | 1  | 2.117667000                      | 3.819335000  | -3.870219000 |
| 6 | 5.461249000  | 2.132368000  | 2.883183000  | 1  | 2.958279000                      | 5.059457000  | -2.949158000 |
| 6 | 3.848798000  | 4.486518000  | 1.941637000  | 1  | 3.537592000                      | 3.397166000  | -2.922339000 |
| 6 | 3.537715000  | 5.520351000  | 1.082663000  | 1  | 0.356980000                      | 2.547289000  | 1.423635000  |
| 6 | 2.878046000  | 5.243681000  | -0.092517000 | 1  | -0.067492000                     | 0.956841000  | 2.269828000  |
| 6 | 2.501360000  | 3.947054000  | -0.420176000 | 1  | 2.582915000                      | -3.569481000 | 0.282769000  |
| 6 | 1.749858000  | 3.724999000  | -1.728566000 | 1  | 3.778906000                      | -3.017846000 | 1.441381000  |
| 6 | 0.483123000  | 4.606413000  | -1.798910000 | 1  | 2.063213000                      | -2.972739000 | 1.874951000  |
| 6 | 2.653612000  | 4.018740000  | -2.946758000 | 1  | 7.707501000                      | -2.836868000 | -0.627447000 |
| 6 | 0.468447000  | 1.470176000  | 1.475828000  | 1  | 7.122466000                      | -4.420273000 | -2.394710000 |
| 6 | 2.773430000  | -2.825889000 | 1.061144000  | 1  | 4.869677000                      | -4.411310000 | -3.344225000 |
| 6 | 4.468639000  | -1.988195000 | -1.027585000 | 1  | 2.131743000                      | -2.209223000 | -2.124949000 |
| 6 | 5.770276000  | -1.957847000 | -0.517392000 | 1  | 1.120858000                      | -4.171890000 | -3.209299000 |
| 6 | 6.709377000  | -2.849115000 | -1.017260000 | 1  | 2.694787000                      | -4.896907000 | -3.462610000 |
| 6 | 6.384061000  | -3.739982000 | -2.017685000 | 1  | 2.074109000                      | -4.713131000 | -1.830967000 |
| 6 | 5.109971000  | -3.737231000 | -2.546520000 | 1  | 1.881896000                      | -2.169501000 | -4.594135000 |
| 6 | 4.142169000  | -2.867088000 | -2.068502000 | 1  | 3.245203000                      | -1.197668000 | -4.053354000 |
| 6 | 2.764895000  | -2.843217000 | -2.722266000 | 1  | 3.523597000                      | -2.783924000 | -4.762685000 |
| 6 | 2.127322000  | -4.246272000 | -2.808218000 | 1  | 5.331327000                      | -0.343153000 | 0.783216000  |
| 6 | 2.861576000  | -2.207078000 | -4.126886000 | 1  | 7.551195000                      | 0.750684000  | 0.686225000  |
| 6 | 6.194025000  | -0.940142000 | 0.534852000  | 1  | 6.889895000                      | 0.507748000  | -0.926118000 |
| 6 | 7.271076000  | 0.002723000  | -0.047370000 | 1  | 8.161477000                      | -0.550641000 | -0.323373000 |
| 6 | 6.711397000  | -1.627228000 | 1.816729000  | 1  | 6.966377000                      | -0.881846000 | 2.562178000  |
| 1 | 1.061661000  | -1.012933000 | 1.805323000  | 1  | 5.959414000                      | -2.285125000 | 2.237197000  |
| 1 | 3.720526000  | 1.126638000  | 2.153201000  | 1  | 7.599105000                      | -2.214416000 | 1.610971000  |
| 1 | 3.450144000  | 1.367156000  | 4.603436000  | 1  | 1.756877000                      | 0.186509000  | -1.900004000 |
| 1 | 3.382118000  | 3.116040000  | 4.437496000  | 32 | 3.247971000                      | 0.637991000  | -1.446660000 |
| 1 | 2.099199000  | 2.118730000  | 3.760014000  | 32 | -3.834655000                     | -0.143588000 | 1.245846000  |
| 1 | 5.758579000  | 1.282347000  | 3.489307000  |    |                                  |              |              |
| 1 | 5.730698000  | 3.033998000  | 3.420602000  |    |                                  |              |              |
|   |              |              |              |    | <i>Ge-intra-TS<sub>1,2</sub></i> |              |              |
| 1 | 6.018934000  | 2.108681000  | 1.955915000  | 1  | 1.064214000                      | -1.596073000 | 0.193183000  |
| 1 | 4.369854000  | 4.701039000  | 2.853127000  | 1  | 0.310792000                      | -2.150763000 | -0.250599000 |
| 1 | 3.813589000  | 6.527924000  | 1.325522000  | 7  | 1.492069000                      | -0.388162000 | 0.513678000  |
| 1 | 2.646566000  | 6.045213000  | -0.765015000 | 6  | 1.299361000                      | -0.328809000 | 1.918401000  |
| 1 | 1.447695000  | 2.689006000  | -1.765635000 | 6  | 0.075899000                      | -0.305765000 | 2.483026000  |
| 1 | -0.073308000 | 4.393343000  | -2.706891000 | 6  | -1.258218000                     | -0.165798000 | 1.882033000  |
| 1 | 0.743207000  | 5.657515000  | -1.813526000 | 7  | -1.373436000                     | -0.132789000 | 0.484865000  |
| 1 | -0.157806000 | 4.429795000  | -0.944154000 | 6  | -2.713070000                     | -0.080584000 | -0.089343000 |

|   |              |              |              |    |                                  |              |              |
|---|--------------|--------------|--------------|----|----------------------------------|--------------|--------------|
| 6 | -3.273592000 | 1.147233000  | -0.453586000 | 1  | -4.692691000                     | -3.614364000 | 0.651371000  |
| 6 | -2.532814000 | 2.462222000  | -0.245442000 | 1  | -3.895109000                     | -2.778997000 | 1.980865000  |
| 6 | -3.221431000 | 3.310365000  | 0.846001000  | 1  | -2.121732000                     | -4.429878000 | -0.890268000 |
| 6 | -2.425719000 | 3.258838000  | -1.563831000 | 1  | -3.499483000                     | -3.682976000 | -1.688904000 |
| 6 | -4.545343000 | 1.161102000  | -1.009239000 | 1  | -1.900859000                     | -2.969130000 | -1.843369000 |
| 6 | -5.246181000 | -0.009476000 | -1.209014000 | 1  | -3.328018000                     | 0.060514000  | 2.340355000  |
| 6 | -4.683081000 | -1.217399000 | -0.852786000 | 1  | -2.168028000                     | -0.081289000 | 3.781371000  |
| 6 | -3.418407000 | -1.273803000 | -0.287192000 | 1  | 2.267179000                      | -0.408891000 | 3.826074000  |
| 6 | -2.826091000 | -2.626374000 | 0.096525000  | 1  | 3.104709000                      | -1.317555000 | 2.552757000  |
| 6 | -3.731990000 | -3.378045000 | 1.093811000  | 1  | 3.207521000                      | 0.437221000  | 2.584668000  |
| 6 | -2.572596000 | -3.481727000 | -1.164439000 | 1  | 4.219794000                      | 3.045804000  | -0.836439000 |
| 6 | -2.318706000 | -0.052276000 | 2.709247000  | 1  | 6.011514000                      | 1.519909000  | -1.494984000 |
| 6 | 2.539091000  | -0.406207000 | 2.769484000  | 1  | 5.715205000                      | -0.888846000 | -1.259039000 |
| 6 | 2.744042000  | 0.123567000  | -0.041102000 | 1  | 2.813296000                      | -2.498443000 | 0.373659000  |
| 6 | 2.894048000  | 1.504743000  | -0.201759000 | 1  | 4.653660000                      | -4.041887000 | 0.317938000  |
| 6 | 4.085577000  | 1.989743000  | -0.718645000 | 1  | 5.671454000                      | -2.925732000 | -0.564526000 |
| 6 | 5.097660000  | 1.130879000  | -1.091390000 | 1  | 5.216452000                      | -2.567759000 | 1.096398000  |
| 6 | 4.928959000  | -0.230506000 | -0.953064000 | 1  | 3.005289000                      | -3.892664000 | -1.668028000 |
| 6 | 3.759627000  | -0.758381000 | -0.423903000 | 1  | 2.260892000                      | -2.346034000 | -2.054000000 |
| 6 | 3.596244000  | -2.273584000 | -0.334891000 | 1  | 3.949491000                      | -2.625526000 | -2.447765000 |
| 6 | 4.869892000  | -2.990781000 | 0.160595000  | 1  | 0.907799000                      | 1.919277000  | 0.441522000  |
| 6 | 3.173259000  | -2.821983000 | -1.717152000 | 1  | 0.584459000                      | 4.022520000  | -0.781998000 |
| 6 | 1.783281000  | 2.484960000  | 0.164276000  | 1  | 1.127572000                      | 2.771029000  | -1.892665000 |
| 6 | 1.415085000  | 3.376507000  | -1.041499000 | 1  | 2.248578000                      | 4.004053000  | -1.332397000 |
| 6 | 2.185496000  | 3.357484000  | 1.372750000  | 1  | 1.374625000                      | 4.029294000  | 1.633321000  |
| 1 | 0.054488000  | -0.349086000 | 3.567098000  | 1  | 2.409033000                      | 2.745355000  | 2.237225000  |
| 1 | -1.537371000 | 2.224220000  | 0.091879000  | 1  | 3.059828000                      | 3.953651000  | 1.137871000  |
| 1 | -4.232922000 | 3.566014000  | 0.551003000  | 32 | -0.064522000                     | -0.422891000 | -0.783596000 |
| 1 | -3.258763000 | 2.765399000  | 1.780387000  |    |                                  |              |              |
| 1 | -2.671500000 | 4.232433000  | 1.007088000  |    |                                  |              |              |
| 1 | -1.848139000 | 4.163338000  | -1.406913000 |    |                                  |              |              |
| 1 | -3.404902000 | 3.548832000  | -1.925302000 |    |                                  |              |              |
| 1 | -1.939096000 | 2.668893000  | -2.331869000 |    |                                  |              |              |
| 1 | -4.990123000 | 2.094853000  | -1.288286000 |    |                                  |              |              |
| 1 | -6.226723000 | 0.019172000  | -1.642242000 |    |                                  |              |              |
| 1 | -5.231041000 | -2.123697000 | -1.015039000 |    |                                  |              |              |
| 1 | -1.878231000 | -2.450489000 | 0.576061000  |    |                                  |              |              |
| 1 | -3.260542000 | -4.309422000 | 1.390582000  |    |                                  |              |              |
|   |              |              |              |    | <i>Ge-intra-IM<sub>1,2</sub></i> |              |              |
| 1 | -1.848139000 | 4.163338000  | -1.406913000 | 1  | 1.064214000                      | -1.596073000 | 0.193183000  |
| 1 | -3.404902000 | 3.548832000  | -1.925302000 | 1  | 0.310792000                      | -2.150763000 | -0.250599000 |
| 1 | -1.939096000 | 2.668893000  | -2.331869000 | 7  | 1.492069000                      | -0.388162000 | 0.513678000  |
| 1 | -4.990123000 | 2.094853000  | -1.288286000 | 6  | 1.299361000                      | -0.328809000 | 1.918401000  |
| 1 | -6.226723000 | 0.019172000  | -1.642242000 | 6  | 0.075899000                      | -0.305765000 | 2.483026000  |
| 1 | -5.231041000 | -2.123697000 | -1.015039000 | 6  | -1.258218000                     | -0.165798000 | 1.882033000  |
| 1 | -1.878231000 | -2.450489000 | 0.576061000  | 7  | -1.373436000                     | -0.132789000 | 0.484865000  |
| 1 | -3.260542000 | -4.309422000 | 1.390582000  | 6  | -2.713070000                     | -0.080584000 | -0.089343000 |

|   |              |              |              |    |                                  |              |              |
|---|--------------|--------------|--------------|----|----------------------------------|--------------|--------------|
| 6 | -3.273592000 | 1.147233000  | -0.453586000 | 1  | -4.692691000                     | -3.614364000 | 0.651371000  |
| 6 | -2.532814000 | 2.462222000  | -0.245442000 | 1  | -3.895109000                     | -2.778997000 | 1.980865000  |
| 6 | -3.221431000 | 3.310365000  | 0.846001000  | 1  | -2.121732000                     | -4.429878000 | -0.890268000 |
| 6 | -2.425719000 | 3.258838000  | -1.563831000 | 1  | -3.499483000                     | -3.682976000 | -1.688904000 |
| 6 | -4.545343000 | 1.161102000  | -1.009239000 | 1  | -1.900859000                     | -2.969130000 | -1.843369000 |
| 6 | -5.246181000 | -0.009476000 | -1.209014000 | 1  | -3.328018000                     | 0.060514000  | 2.340355000  |
| 6 | -4.683081000 | -1.217399000 | -0.852786000 | 1  | -2.168028000                     | -0.081289000 | 3.781371000  |
| 6 | -3.418407000 | -1.273803000 | -0.287192000 | 1  | 2.267179000                      | -0.408891000 | 3.826074000  |
| 6 | -2.826091000 | -2.626374000 | 0.096525000  | 1  | 3.104709000                      | -1.317555000 | 2.552757000  |
| 6 | -3.731990000 | -3.378045000 | 1.093811000  | 1  | 3.207521000                      | 0.437221000  | 2.584668000  |
| 6 | -2.572596000 | -3.481727000 | -1.164439000 | 1  | 4.219794000                      | 3.045804000  | -0.836439000 |
| 6 | -2.318706000 | -0.052276000 | 2.709247000  | 1  | 6.011514000                      | 1.519909000  | -1.494984000 |
| 6 | 2.539091000  | -0.406207000 | 2.769484000  | 1  | 5.715205000                      | -0.888846000 | -1.259039000 |
| 6 | 2.744042000  | 0.123567000  | -0.041102000 | 1  | 2.813296000                      | -2.498443000 | 0.373659000  |
| 6 | 2.894048000  | 1.504743000  | -0.201759000 | 1  | 4.653660000                      | -4.041887000 | 0.317938000  |
| 6 | 4.085577000  | 1.989743000  | -0.718645000 | 1  | 5.671454000                      | -2.925732000 | -0.564526000 |
| 6 | 5.097660000  | 1.130879000  | -1.091390000 | 1  | 5.216452000                      | -2.567759000 | 1.096398000  |
| 6 | 4.928959000  | -0.230506000 | -0.953064000 | 1  | 3.005289000                      | -3.892664000 | -1.668028000 |
| 6 | 3.759627000  | -0.758381000 | -0.423903000 | 1  | 2.260892000                      | -2.346034000 | -2.054000000 |
| 6 | 3.596244000  | -2.273584000 | -0.334891000 | 1  | 3.949491000                      | -2.625526000 | -2.447765000 |
| 6 | 4.869892000  | -2.990781000 | 0.160595000  | 1  | 0.907799000                      | 1.919277000  | 0.441522000  |
| 6 | 3.173259000  | -2.821983000 | -1.717152000 | 1  | 0.584459000                      | 4.022520000  | -0.781998000 |
| 6 | 1.783281000  | 2.484960000  | 0.164276000  | 1  | 1.127572000                      | 2.771029000  | -1.892665000 |
| 6 | 1.415085000  | 3.376507000  | -1.041499000 | 1  | 2.248578000                      | 4.004053000  | -1.332397000 |
| 6 | 2.185496000  | 3.357484000  | 1.372750000  | 1  | 1.374625000                      | 4.029294000  | 1.633321000  |
| 1 | 0.054488000  | -0.349086000 | 3.567098000  | 1  | 2.409033000                      | 2.745355000  | 2.237225000  |
| 1 | -1.537371000 | 2.224220000  | 0.091879000  | 1  | 3.059828000                      | 3.953651000  | 1.137871000  |
| 1 | -4.232922000 | 3.566014000  | 0.551003000  | 32 | -0.064522000                     | -0.422891000 | -0.783596000 |
| 1 | -3.258763000 | 2.765399000  | 1.780387000  |    |                                  |              |              |
| 1 | -2.671500000 | 4.232433000  | 1.007088000  |    |                                  |              |              |
| 1 | -1.848139000 | 4.163338000  | -1.406913000 |    |                                  |              |              |
| 1 | -3.404902000 | 3.548832000  | -1.925302000 |    |                                  |              |              |
| 1 | -1.939096000 | 2.668893000  | -2.331869000 |    |                                  |              |              |
| 1 | -4.990123000 | 2.094853000  | -1.288286000 |    |                                  |              |              |
| 1 | -6.226723000 | 0.019172000  | -1.642242000 |    |                                  |              |              |
| 1 | -5.231041000 | -2.123697000 | -1.015039000 |    |                                  |              |              |
| 1 | -1.878231000 | -2.450489000 | 0.576061000  |    |                                  |              |              |
| 1 | -3.260542000 | -4.309422000 | 1.390582000  |    |                                  |              |              |
|   |              |              |              |    | <i>Ge-intra-TS<sub>2,4</sub></i> |              |              |
| 1 | -1.848139000 | 4.163338000  | -1.406913000 | 1  | -0.352108000                     | -0.993622000 | -0.582997000 |
| 1 | -3.404902000 | 3.548832000  | -1.925302000 | 1  | 0.343472000                      | 1.519213000  | 1.172109000  |
| 1 | -1.939096000 | 2.668893000  | -2.331869000 | 7  | -1.163811000                     | 0.255742000  | -0.676551000 |
| 1 | -4.990123000 | 2.094853000  | -1.288286000 | 6  | -1.032396000                     | 0.300538000  | -2.093584000 |
| 1 | -6.226723000 | 0.019172000  | -1.642242000 | 6  | 0.192773000                      | -0.067878000 | -2.520961000 |
| 1 | -5.231041000 | -2.123697000 | -1.015039000 | 6  | 1.063245000                      | -0.585436000 | -1.416646000 |
| 1 | -1.878231000 | -2.450489000 | 0.576061000  | 7  | 1.631555000                      | 0.310354000  | -0.595068000 |
| 1 | -3.260542000 | -4.309422000 | 1.390582000  | 6  | 2.719700000                      | -0.054687000 | 0.312278000  |



|   |              |              |              |    |                                  |              |              |
|---|--------------|--------------|--------------|----|----------------------------------|--------------|--------------|
| 6 | 4.008368000  | 0.235202000  | -0.166549000 | 1  | 1.733028000                      | -2.641942000 | 3.427764000  |
| 6 | 4.216797000  | 0.870157000  | -1.539277000 | 1  | 1.236453000                      | -3.068451000 | 1.803759000  |
| 6 | 4.586304000  | -0.221775000 | -2.568842000 | 1  | -0.026857000                     | -0.177492000 | 3.859960000  |
| 6 | 5.292473000  | 1.976304000  | -1.526434000 | 1  | 1.686672000                      | -0.276076000 | 4.237901000  |
| 6 | 5.105897000  | -0.088016000 | 0.612432000  | 1  | 1.085786000                      | 1.022589000  | 3.216388000  |
| 6 | 4.945232000  | -0.665735000 | 1.854968000  | 1  | 1.220599000                      | -2.311164000 | -0.147068000 |
| 6 | 3.679210000  | -0.917908000 | 2.330667000  | 1  | 0.357356000                      | -2.569935000 | -1.760822000 |
| 6 | 2.545744000  | -0.621595000 | 1.580875000  | 1  | -2.251385000                     | 1.922369000  | -2.706771000 |
| 6 | 1.185017000  | -0.911827000 | 2.216115000  | 1  | -1.851945000                     | 0.776353000  | -4.007248000 |
| 6 | 1.043530000  | -2.395764000 | 2.629635000  | 1  | -3.069576000                     | 0.360049000  | -2.773442000 |
| 6 | 0.971645000  | -0.023257000 | 3.463612000  | 1  | -4.797737000                     | 1.743006000  | 1.797529000  |
| 6 | 0.739973000  | -1.882771000 | -1.014526000 | 1  | -5.891233000                     | -0.438585000 | 1.717045000  |
| 6 | -2.117646000 | 0.862663000  | -2.951935000 | 1  | -4.889405000                     | -2.235410000 | 0.395107000  |
| 6 | -2.510315000 | 0.123798000  | -0.086047000 | 1  | -1.808538000                     | -1.980315000 | -1.577563000 |
| 6 | -3.131742000 | 1.176784000  | 0.605527000  | 1  | -3.284240000                     | -3.554697000 | -2.662455000 |
| 6 | -4.339482000 | 0.942927000  | 1.253394000  | 1  | -4.586157000                     | -3.200060000 | -1.544391000 |
| 6 | -4.963725000 | -0.279304000 | 1.203707000  | 1  | -4.045347000                     | -1.969320000 | -2.673625000 |
| 6 | -4.392145000 | -1.289619000 | 0.463516000  | 1  | -1.829052000                     | -4.270972000 | -0.671470000 |
| 6 | -3.185387000 | -1.110469000 | -0.192666000 | 1  | -1.502051000                     | -3.130733000 | 0.629035000  |
| 6 | -2.666419000 | -2.292678000 | -1.012025000 | 1  | -3.101015000                     | -3.833352000 | 0.458995000  |
| 6 | -3.717217000 | -2.781520000 | -2.036069000 | 1  | -1.710259000                     | 2.683011000  | 0.078663000  |
| 6 | -2.245091000 | -3.455653000 | -0.087880000 | 1  | -1.834378000                     | 4.030326000  | 2.107314000  |
| 6 | -2.606445000 | 2.607717000  | 0.666021000  | 1  | -1.572291000                     | 2.352965000  | 2.563714000  |
| 6 | -2.274982000 | 3.038841000  | 2.109911000  | 1  | -3.171034000                     | 3.070036000  | 2.719123000  |
| 6 | -3.615277000 | 3.589654000  | 0.026750000  | 1  | -3.187811000                     | 4.586329000  | -0.000030000 |
| 1 | 0.514557000  | -0.054569000 | -3.553967000 | 1  | -3.853104000                     | 3.291082000  | -0.987540000 |
| 1 | 3.283478000  | 1.319879000  | -1.835408000 | 1  | -4.537168000                     | 3.632623000  | 0.593920000  |
| 1 | 5.520344000  | -0.697931000 | -2.291631000 | 14 | 0.344015000                      | 1.719466000  | -0.323111000 |
| 1 | 3.819309000  | -0.986533000 | -2.614914000 |    |                                  |              |              |
| 1 | 4.701399000  | 0.210773000  | -3.557759000 |    | <i>Ge-intra-TS<sub>1,1</sub></i> |              |              |
| 1 | 5.310418000  | 2.473888000  | -2.490410000 | 6  | 1.244652000                      | -0.334685000 | 1.878511000  |
| 1 | 6.281809000  | 1.573058000  | -1.345860000 | 6  | 0.020544000                      | -0.399004000 | 2.455919000  |
| 1 | 5.076189000  | 2.715881000  | -0.764688000 | 6  | -1.315974000                     | -0.177843000 | 1.886343000  |
| 1 | 6.092208000  | 0.115586000  | 0.249693000  | 6  | -2.364900000                     | 0.020105000  | 2.712658000  |
| 1 | 5.802550000  | -0.909921000 | 2.450899000  | 7  | 1.446860000                      | -0.275355000 | 0.493484000  |
| 1 | 3.562758000  | -1.352005000 | 3.302605000  | 7  | -1.443286000                     | -0.160484000 | 0.483539000  |
| 1 | 0.410994000  | -0.674553000 | 1.506271000  | 1  | 0.015708000                      | -0.486220000 | 3.536074000  |
| 1 | 0.037070000  | -2.578737000 | 2.991348000  | 1  | -3.365188000                     | 0.194444000  | 2.343070000  |





|   |              |              |              |   |              |              |              |
|---|--------------|--------------|--------------|---|--------------|--------------|--------------|
| 6 | -1.501907000 | 5.278065000  | 1.682856000  | 1 | 0.471901000  | 1.502754000  | 3.118593000  |
| 6 | -1.460278000 | 4.184164000  | 2.521467000  | 6 | -2.884153000 | 1.835930000  | 3.990867000  |
| 6 | -1.704465000 | 2.904556000  | 2.040572000  | 1 | -3.826527000 | 1.887383000  | 3.457082000  |
| 6 | -0.012705000 | 1.125062000  | -0.589930000 | 1 | -2.907712000 | 0.974732000  | 4.650262000  |
| 6 | -2.987816000 | -2.638415000 | -1.525461000 | 1 | -2.794254000 | 2.727433000  | 4.600109000  |
| 6 | -5.307219000 | -1.309564000 | -0.603264000 | 6 | -5.588031000 | -0.180515000 | -2.883570000 |
| 6 | -6.070303000 | -1.087625000 | -1.753793000 | 1 | -4.564879000 | 0.098345000  | -2.683898000 |
| 6 | -7.317114000 | -1.687885000 | -1.845642000 | 6 | -6.437707000 | 1.110200000  | -2.925065000 |
| 6 | -7.798252000 | -2.481909000 | -0.825344000 | 1 | -7.474330000 | 0.877221000  | -3.137316000 |
| 6 | -7.039502000 | -2.684721000 | 0.308245000  | 1 | -6.397838000 | 1.629762000  | -1.974429000 |
| 6 | -5.785960000 | -2.105234000 | 0.441457000  | 1 | -6.071939000 | 1.777679000  | -3.698144000 |
| 1 | -0.796607000 | -1.208859000 | -1.300610000 | 6 | -5.626490000 | -0.891554000 | -4.253131000 |
| 1 | -1.845566000 | 5.971570000  | -0.294345000 | 1 | -5.212375000 | -0.241836000 | -5.016474000 |
| 1 | -1.309147000 | 6.258260000  | 2.071635000  | 1 | -5.046723000 | -1.806438000 | -4.233998000 |
| 1 | -1.240229000 | 4.324864000  | 3.559817000  | 1 | -6.641974000 | -1.137284000 | -4.538496000 |
| 1 | 0.170732000  | 2.182646000  | -0.443062000 | 6 | -4.989860000 | -2.325418000 | 1.725366000  |
| 1 | 0.544820000  | 0.664363000  | -1.400142000 | 1 | -4.006555000 | -1.901859000 | 1.592180000  |
| 1 | -3.413394000 | -3.329777000 | -0.795586000 | 6 | -5.671935000 | -1.597471000 | 2.906304000  |
| 1 | -3.651971000 | -2.638713000 | -2.392474000 | 1 | -5.086981000 | -1.720125000 | 3.811679000  |
| 1 | -2.005770000 | -3.002190000 | -1.829882000 | 1 | -5.772542000 | -0.537632000 | 2.702399000  |
| 1 | -7.918609000 | -1.528606000 | -2.717299000 | 1 | -6.661784000 | -2.001691000 | 3.082133000  |
| 1 | -8.765110000 | -2.936853000 | -0.911197000 | 6 | -4.818629000 | -3.825072000 | 2.048749000  |
| 1 | -7.426411000 | -3.295194000 | 1.098428000  | 1 | -5.772880000 | -4.291325000 | 2.261306000  |
| 6 | -2.430312000 | 3.714687000  | -1.651169000 | 1 | -4.356852000 | -4.352120000 | 1.222766000  |
| 1 | -2.508529000 | 2.664388000  | -1.884556000 | 1 | -4.186211000 | -3.942149000 | 2.921678000  |
| 6 | -1.692645000 | 1.725042000  | 3.011052000  | 7 | 3.732873000  | 0.729770000  | -0.550734000 |
| 1 | -1.805108000 | 0.814234000  | 2.442351000  | 6 | 3.289194000  | 0.562833000  | -1.858742000 |
| 6 | -1.354779000 | 4.322207000  | -2.576122000 | 6 | 2.498931000  | -0.466468000 | -2.263395000 |
| 1 | -1.265321000 | 5.390759000  | -2.422220000 | 6 | 2.059589000  | -1.652919000 | -1.524004000 |
| 1 | -0.390270000 | 3.865189000  | -2.395910000 | 7 | 2.532455000  | -1.812049000 | -0.211291000 |
| 1 | -1.624594000 | 4.154581000  | -3.613416000 | 6 | 2.564144000  | -3.160356000 | 0.332312000  |
| 6 | -3.804881000 | 4.370464000  | -1.915747000 | 6 | 3.553410000  | -4.059926000 | -0.099525000 |
| 1 | -4.094766000 | 4.230959000  | -2.951949000 | 6 | 3.587780000  | -5.335680000 | 0.438307000  |
| 1 | -4.569815000 | 3.935244000  | -1.282302000 | 6 | 2.684148000  | -5.729103000 | 1.404676000  |
| 1 | -3.766471000 | 5.434170000  | -1.713674000 | 6 | 1.723434000  | -4.842660000 | 1.834170000  |
| 6 | -0.365206000 | 1.630909000  | 3.791161000  | 6 | 1.639719000  | -3.561864000 | 1.301397000  |
| 1 | -0.198991000 | 2.518625000  | 4.389177000  | 6 | 1.231609000  | -2.541799000 | -2.130826000 |
| 1 | -0.395021000 | 0.779029000  | 4.460948000  | 6 | 3.675899000  | 1.621321000  | -2.861726000 |

|   |             |              |              |    |                                  |              |              |
|---|-------------|--------------|--------------|----|----------------------------------|--------------|--------------|
| 6 | 4.754122000 | 1.733590000  | -0.279782000 | 6  | 4.596249000                      | -3.673931000 | -1.142025000 |
| 6 | 6.110820000 | 1.419171000  | -0.431531000 | 1  | 4.484175000                      | -2.622026000 | -1.346582000 |
| 6 | 7.061642000 | 2.404620000  | -0.205262000 | 6  | 6.025700000                      | -3.916712000 | -0.611208000 |
| 6 | 6.694485000 | 3.672602000  | 0.189848000  | 1  | 6.216170000                      | -4.974369000 | -0.471973000 |
| 6 | 5.361152000 | 3.966378000  | 0.378963000  | 1  | 6.753879000                      | -3.538697000 | -1.321833000 |
| 6 | 4.380533000 | 3.012769000  | 0.150819000  | 1  | 6.174110000                      | -3.415448000 | 0.336927000  |
| 1 | 2.162981000 | -0.437609000 | -3.294636000 | 6  | 4.381009000                      | -4.452885000 | -2.457733000 |
| 1 | 4.335473000 | -6.027671000 | 0.106414000  | 1  | 3.391117000                      | -4.263322000 | -2.848650000 |
| 1 | 2.732896000 | -6.717265000 | 1.818849000  | 1  | 5.111859000                      | -4.143747000 | -3.199017000 |
| 1 | 1.025463000 | -5.147231000 | 2.588096000  | 1  | 4.496148000                      | -5.518716000 | -2.292382000 |
| 1 | 0.907482000 | -3.449535000 | -1.639249000 | 6  | 0.538292000                      | -2.633086000 | 1.794247000  |
| 1 | 0.952393000 | -2.391519000 | -3.167722000 | 1  | 0.545813000                      | -1.755448000 | 1.169801000  |
| 1 | 3.364768000 | 2.613200000  | -2.525805000 | 6  | -0.850133000                     | -3.296411000 | 1.677864000  |
| 1 | 4.758333000 | 1.659878000  | -2.998519000 | 1  | -0.944003000                     | -4.133797000 | 2.359286000  |
| 1 | 3.209852000 | 1.412732000  | -3.826138000 | 1  | -1.623997000                     | -2.576420000 | 1.922933000  |
| 1 | 8.100321000 | 2.173322000  | -0.330254000 | 1  | -1.019736000                     | -3.653217000 | 0.669847000  |
| 1 | 7.442371000 | 4.421679000  | 0.362285000  | 6  | 0.798150000                      | -2.204882000 | 3.255083000  |
| 1 | 5.079094000 | 4.945525000  | 0.710096000  | 1  | 1.740378000                      | -1.678772000 | 3.336839000  |
| 6 | 2.925522000 | 3.365619000  | 0.421785000  | 1  | 0.006866000                      | -1.548419000 | 3.602585000  |
| 1 | 2.323533000 | 2.552649000  | 0.057306000  | 1  | 0.831307000                      | -3.072091000 | 3.905178000  |
| 6 | 2.485290000 | 4.661496000  | -0.291615000 | 1  | 0.847923000                      | 0.616720000  | 0.409927000  |
| 1 | 1.425616000 | 4.828766000  | -0.129465000 | 1  | 1.599783000                      | 0.345855000  | 0.985714000  |
| 1 | 3.019951000 | 5.522754000  | 0.091479000  | 32 | 3.237643000                      | -0.429694000 | 0.871952000  |
| 1 | 2.664586000 | 4.598828000  | -1.358982000 | 32 | -4.103785000                     | 1.012317000  | 0.346825000  |
| 6 | 2.695006000 | 3.485456000  | 1.944343000  |    |                                  |              |              |
| 1 | 2.949539000 | 2.553681000  | 2.435014000  |    | <i>Ge-inter-IM<sub>1,4</sub></i> |              |              |
| 1 | 3.313100000 | 4.272413000  | 2.362034000  | 7  | 3.080228000                      | -0.597839000 | 1.341579000  |
| 1 | 1.655795000 | 3.715795000  | 2.151305000  | 6  | 1.744261000                      | -0.442773000 | 1.221235000  |
| 6 | 6.585996000 | 0.016767000  | -0.795547000 | 6  | 1.174623000                      | 0.189998000  | 0.106911000  |
| 1 | 5.718640000 | -0.613292000 | -0.905936000 | 6  | 1.850967000                      | 0.745817000  | -0.964786000 |
| 6 | 7.368092000 | 0.003017000  | -2.126590000 | 7  | 3.211181000                      | 0.742463000  | -1.039575000 |
| 1 | 8.269156000 | 0.601014000  | -2.052733000 | 6  | 3.891718000                      | 1.395868000  | -2.167970000 |
| 1 | 7.656820000 | -1.012504000 | -2.377291000 | 6  | 4.248771000                      | 2.741552000  | -2.050438000 |
| 1 | 6.764861000 | 0.393536000  | -2.937084000 | 6  | 4.938785000                      | 3.327632000  | -3.100975000 |
| 6 | 7.457926000 | -0.554562000 | 0.345818000  | 6  | 5.267142000                      | 2.600551000  | -4.226387000 |
| 1 | 8.336712000 | 0.059283000  | 0.503545000  | 6  | 4.913802000                      | 1.270587000  | -4.320586000 |
| 1 | 6.894066000 | -0.589409000 | 1.270365000  | 6  | 4.221101000                      | 0.641622000  | -3.296316000 |
| 1 | 7.786411000 | -1.557808000 | 0.102740000  | 6  | 0.807791000                      | -0.962862000 | 2.244548000  |

|   |             |              |              |   |              |              |              |
|---|-------------|--------------|--------------|---|--------------|--------------|--------------|
| 6 | 3.657599000 | -1.312698000 | 2.491086000  | 6 | 5.269793000  | 1.632472000  | 3.804118000  |
| 6 | 4.068819000 | -0.582488000 | 3.607740000  | 1 | 5.791016000  | 1.337077000  | 4.706349000  |
| 6 | 4.657303000 | -1.274314000 | 4.656041000  | 1 | 5.894934000  | 1.378848000  | 2.955185000  |
| 6 | 4.833076000 | -2.641249000 | 4.593213000  | 1 | 5.138388000  | 2.708892000  | 3.826367000  |
| 6 | 4.425780000 | -3.342992000 | 3.477542000  | 6 | 3.006725000  | 1.313123000  | 4.912274000  |
| 6 | 3.831833000 | -2.695175000 | 2.404323000  | 1 | 2.853690000  | 2.386515000  | 4.933490000  |
| 1 | 0.086992000 | 0.238944000  | 0.085576000  | 1 | 2.038870000  | 0.831409000  | 4.848247000  |
| 1 | 5.224583000 | 4.357469000  | -3.037013000 | 1 | 3.473411000  | 1.020888000  | 5.845001000  |
| 1 | 5.801591000 | 3.069429000  | -5.028380000 | 6 | 3.410047000  | -3.501342000 | 1.177314000  |
| 1 | 5.180327000 | 0.715902000  | -5.196474000 | 1 | 2.915756000  | -2.841745000 | 0.480386000  |
| 1 | 0.242808000 | -1.809016000 | 1.811328000  | 6 | 4.651868000  | -4.092696000 | 0.472272000  |
| 1 | 1.297265000 | -1.280192000 | 3.160749000  | 1 | 4.352351000  | -4.627240000 | -0.422487000 |
| 1 | 0.036701000 | -0.210514000 | 2.444300000  | 1 | 5.348758000  | -3.310775000 | 0.189759000  |
| 1 | 4.979444000 | -0.740568000 | 5.526629000  | 1 | 5.170151000  | -4.785487000 | 1.124028000  |
| 1 | 5.288611000 | -3.159458000 | 5.413340000  | 6 | 2.411350000  | -4.618886000 | 1.548351000  |
| 1 | 4.569862000 | -4.403181000 | 3.439588000  | 1 | 2.866956000  | -5.342953000 | 2.212858000  |
| 6 | 3.934035000 | 3.566800000  | -0.803662000 | 1 | 1.532084000  | -4.211731000 | 2.031464000  |
| 1 | 3.310709000 | 2.977765000  | -0.147832000 | 1 | 2.093216000  | -5.137731000 | 0.651309000  |
| 6 | 3.874755000 | -0.840934000 | -3.420963000 | 7 | -3.638010000 | 1.220927000  | 0.649031000  |
| 1 | 3.217813000 | -1.112788000 | -2.608094000 | 6 | -3.187858000 | 0.729600000  | 1.846630000  |
| 6 | 3.162829000 | 4.859295000  | -1.147607000 | 6 | -2.535986000 | -0.471441000 | 1.975254000  |
| 1 | 3.765225000 | 5.524298000  | -1.753835000 | 6 | -2.484372000 | -1.603074000 | 1.045952000  |
| 1 | 2.249840000 | 4.638915000  | -1.686885000 | 7 | -3.015647000 | -1.415218000 | -0.223248000 |
| 1 | 2.899838000 | 5.383421000  | -0.235503000 | 6 | -3.305641000 | -2.583565000 | -1.018168000 |
| 6 | 5.239061000 | 3.904084000  | -0.046481000 | 6 | -4.522911000 | -3.260399000 | -0.850632000 |
| 1 | 5.015245000 | 4.456627000  | 0.859665000  | 6 | -4.782236000 | -4.389633000 | -1.610962000 |
| 1 | 5.776429000 | 3.001756000  | 0.223967000  | 6 | -3.869992000 | -4.851171000 | -2.538700000 |
| 1 | 5.891510000 | 4.510467000  | -0.662838000 | 6 | -2.680987000 | -4.177535000 | -2.713820000 |
| 6 | 3.140027000 | -1.153734000 | -4.742236000 | 6 | -2.382971000 | -3.049540000 | -1.961499000 |
| 1 | 3.784811000 | -0.990253000 | -5.596780000 | 6 | -1.986150000 | -2.797116000 | 1.497837000  |
| 1 | 2.829470000 | -2.192241000 | -4.750281000 | 6 | -3.417152000 | 1.555688000  | 3.091968000  |
| 1 | 2.257765000 | -0.536562000 | -4.856254000 | 6 | -4.322698000 | 2.493546000  | 0.598271000  |
| 6 | 5.158185000 | -1.696080000 | -3.309726000 | 6 | -5.720927000 | 2.543526000  | 0.617153000  |
| 1 | 5.675446000 | -1.507283000 | -2.375557000 | 6 | -6.355792000 | 3.777526000  | 0.593465000  |
| 1 | 4.911404000 | -2.750960000 | -3.359534000 | 6 | -5.632972000 | 4.949458000  | 0.531156000  |
| 1 | 5.838369000 | -1.465414000 | -4.120808000 | 6 | -4.255611000 | 4.897007000  | 0.471823000  |
| 6 | 3.895989000 | 0.931516000  | 3.708923000  | 6 | -3.586798000 | 3.682923000  | 0.499494000  |
| 1 | 3.404659000 | 1.283124000  | 2.813907000  | 1 | -2.212084000 | -0.720647000 | 2.981046000  |

|   |              |              |              |    |                                     |              |              |
|---|--------------|--------------|--------------|----|-------------------------------------|--------------|--------------|
| 1 | -5.708222000 | -4.913256000 | -1.479901000 | 1  | -4.675704000                        | -3.828472000 | 1.837409000  |
| 1 | -4.087937000 | -5.724985000 | -3.121725000 | 1  | -6.357483000                        | -3.369984000 | 2.089742000  |
| 1 | -1.975976000 | -4.531720000 | -3.440464000 | 1  | -5.966450000                        | -4.724853000 | 1.037424000  |
| 1 | -1.982914000 | -3.685356000 | 0.882093000  | 6  | -1.056070000                        | -2.335308000 | -2.183854000 |
| 1 | -1.709005000 | -2.899273000 | 2.541784000  | 1  | -1.013166000                        | -1.515834000 | -1.486941000 |
| 1 | -3.000617000 | 2.559961000  | 3.000917000  | 6  | 0.141406000                         | -3.267405000 | -1.901298000 |
| 1 | -4.488043000 | 1.673795000  | 3.277041000  | 1  | 0.159305000                         | -4.104177000 | -2.590506000 |
| 1 | -2.972898000 | 1.062547000  | 3.958768000  | 1  | 1.075387000                         | -2.720360000 | -2.011303000 |
| 1 | -7.426538000 | 3.819872000  | 0.616815000  | 1  | 0.082321000                         | -3.651051000 | -0.890045000 |
| 1 | -6.138321000 | 5.895458000  | 0.513725000  | 6  | -0.980936000                        | -1.762477000 | -3.615657000 |
| 1 | -3.697565000 | 5.809105000  | 0.395692000  | 1  | -1.794061000                        | -1.066795000 | -3.781103000 |
| 6 | -2.068150000 | 3.661096000  | 0.360205000  | 1  | -0.041699000                        | -1.238474000 | -3.767478000 |
| 1 | -1.734243000 | 2.652397000  | 0.541468000  | 1  | -1.047176000                        | -2.553602000 | -4.353984000 |
| 6 | -1.365219000 | 4.605472000  | 1.358469000  | 1  | -1.570183000                        | 0.584173000  | -0.596359000 |
| 1 | -0.287519000 | 4.500327000  | 1.270625000  | 6  | 1.061601000                         | 1.368883000  | -2.073797000 |
| 1 | -1.613766000 | 5.641958000  | 1.163108000  | 1  | 1.287903000                         | 0.878419000  | -3.022309000 |
| 1 | -1.647569000 | 4.375029000  | 2.378848000  | 1  | -0.006537000                        | 1.282710000  | -1.867794000 |
| 6 | -1.682989000 | 4.035255000  | -1.088990000 | 1  | 1.323735000                         | 2.423051000  | -2.182334000 |
| 1 | -2.118706000 | 3.327783000  | -1.783366000 | 32 | -3.102429000                        | 0.355465000  | -1.019534000 |
| 1 | -2.044372000 | 5.027070000  | -1.335791000 | 32 | 4.404178000                         | -0.001997000 | 0.170535000  |
| 1 | -0.603399000 | 4.025452000  | -1.210682000 |    |                                     |              |              |
| 6 | -6.559835000 | 1.272513000  | 0.623002000  |    | <b>Ge-inter-TS<sub>1,4</sub>-II</b> |              |              |
| 1 | -5.879631000 | 0.437308000  | 0.607441000  | 7  | -2.764602000                        | 1.789407000  | -0.031780000 |
| 6 | -7.437237000 | 1.173972000  | 1.889048000  | 6  | -2.050326000                        | 1.697799000  | -1.174078000 |
| 1 | -8.152068000 | 1.988428000  | 1.930645000  | 6  | -2.004002000                        | 0.525640000  | -1.934699000 |
| 1 | -7.989425000 | 0.239541000  | 1.888684000  | 6  | -2.725396000                        | -0.645469000 | -1.705701000 |
| 1 | -6.829199000 | 1.208233000  | 2.785441000  | 7  | -3.569942000                        | -0.780131000 | -0.658212000 |
| 6 | -7.434349000 | 1.207150000  | -0.648762000 | 6  | -4.523910000                        | -1.911241000 | -0.644888000 |
| 1 | -8.125941000 | 2.041287000  | -0.687218000 | 6  | -4.215336000                        | -3.085019000 | 0.045727000  |
| 1 | -6.810015000 | 1.234817000  | -1.533567000 | 6  | -5.150694000                        | -4.111179000 | 0.039724000  |
| 1 | -8.010698000 | 0.289223000  | -0.661845000 | 6  | -6.349759000                        | -3.979878000 | -0.625153000 |
| 6 | -5.557277000 | -2.777373000 | 0.157050000  | 6  | -6.644221000                        | -2.808461000 | -1.291436000 |
| 1 | -5.226694000 | -1.813968000 | 0.508846000  | 6  | -5.746035000                        | -1.752928000 | -1.310279000 |
| 6 | -6.946856000 | -2.612052000 | -0.493930000 | 6  | -1.278737000                        | 2.892063000  | -1.649381000 |
| 1 | -7.351060000 | -3.568339000 | -0.806169000 | 6  | -2.843575000                        | 3.092173000  | 0.668549000  |
| 1 | -7.639621000 | -2.176722000 | 0.219612000  | 6  | -1.882583000                        | 3.425778000  | 1.627550000  |
| 1 | -6.890278000 | -1.963594000 | -1.359673000 | 6  | -1.996106000                        | 4.657773000  | 2.258547000  |
| 6 | -5.642467000 | -3.740794000 | 1.360850000  | 6  | -3.021784000                        | 5.525447000  | 1.955584000  |

|   |              |              |              |   |              |              |              |
|---|--------------|--------------|--------------|---|--------------|--------------|--------------|
| 6 | -3.969150000 | 5.172796000  | 1.017628000  | 6 | 0.639052000  | 3.194836000  | 1.919539000  |
| 6 | -3.904446000 | 3.953282000  | 0.361664000  | 1 | 1.422161000  | 2.462515000  | 2.066148000  |
| 1 | -1.335833000 | 0.524499000  | -2.786059000 | 1 | 0.783571000  | 3.633528000  | 0.940051000  |
| 1 | -4.933025000 | -5.019366000 | 0.562436000  | 1 | 0.743831000  | 3.975364000  | 2.663956000  |
| 1 | -7.056973000 | -4.785218000 | -0.620249000 | 6 | -5.001828000 | 3.609133000  | -0.644497000 |
| 1 | -7.583362000 | -2.712128000 | -1.796628000 | 1 | -4.810453000 | 2.625873000  | -1.048442000 |
| 1 | -0.774146000 | 2.665282000  | -2.588409000 | 6 | -6.380403000 | 3.580786000  | 0.053815000  |
| 1 | -1.942754000 | 3.746341000  | -1.792013000 | 1 | -7.152336000 | 3.297525000  | -0.652018000 |
| 1 | -0.532835000 | 3.187155000  | -0.907633000 | 1 | -6.384075000 | 2.872484000  | 0.874023000  |
| 1 | -1.270136000 | 4.934980000  | 2.994017000  | 1 | -6.629079000 | 4.556858000  | 0.450251000  |
| 1 | -3.087270000 | 6.472728000  | 2.452723000  | 6 | -5.021247000 | 4.606351000  | -1.824006000 |
| 1 | -4.768110000 | 5.850191000  | 0.796041000  | 1 | -5.250389000 | 5.606257000  | -1.477390000 |
| 6 | -2.914803000 | -3.272089000 | 0.817457000  | 1 | -4.064740000 | 4.634773000  | -2.331187000 |
| 1 | -2.279648000 | -2.425551000 | 0.628341000  | 1 | -5.779709000 | 4.316446000  | -2.543130000 |
| 6 | -6.143299000 | -0.466362000 | -2.032498000 | 6 | -2.573871000 | -1.785915000 | -2.667028000 |
| 1 | -5.331604000 | 0.241639000  | -1.957561000 | 1 | -1.771624000 | -1.580784000 | -3.374637000 |
| 6 | -2.150347000 | -4.537715000 | 0.370155000  | 1 | -2.339945000 | -2.703497000 | -2.126785000 |
| 1 | -2.706267000 | -5.436101000 | 0.611071000  | 1 | -3.505489000 | -1.955894000 | -3.210660000 |
| 1 | -1.963441000 | -4.527510000 | -0.696967000 | 1 | -2.212774000 | -0.423449000 | 2.126365000  |
| 1 | -1.192812000 | -4.585136000 | 0.874509000  | 1 | -1.506008000 | -0.518376000 | 1.889921000  |
| 6 | -3.203439000 | -3.332084000 | 2.334696000  | 7 | 3.981445000  | 0.775945000  | -0.533279000 |
| 1 | -2.271526000 | -3.392531000 | 2.884229000  | 6 | 2.752952000  | 1.185870000  | -0.949637000 |
| 1 | -3.741679000 | -2.450852000 | 2.665232000  | 6 | 1.576269000  | 0.642366000  | -0.493120000 |
| 1 | -3.800987000 | -4.203495000 | 2.575783000  | 6 | 1.364973000  | -0.638290000 | 0.169110000  |
| 6 | -6.416420000 | -0.715247000 | -3.532168000 | 7 | 2.451116000  | -1.335332000 | 0.626022000  |
| 1 | -7.258176000 | -1.383354000 | -3.664569000 | 6 | 2.257078000  | -2.696669000 | 1.062599000  |
| 1 | -6.648937000 | 0.221500000  | -4.026851000 | 6 | 2.344556000  | -3.749020000 | 0.142471000  |
| 1 | -5.555846000 | -1.153706000 | -4.021914000 | 6 | 2.138094000  | -5.049543000 | 0.577926000  |
| 6 | -7.386390000 | 0.159788000  | -1.361483000 | 6 | 1.866817000  | -5.320974000 | 1.904353000  |
| 1 | -7.202479000 | 0.354200000  | -0.311426000 | 6 | 1.804583000  | -4.284610000 | 2.813052000  |
| 1 | -7.642978000 | 1.094416000  | -1.847513000 | 6 | 1.992481000  | -2.969625000 | 2.410138000  |
| 1 | -8.238050000 | -0.504276000 | -1.437212000 | 6 | 0.079017000  | -1.132484000 | 0.222825000  |
| 6 | -0.737545000 | 2.500418000  | 2.031355000  | 6 | 2.678464000  | 2.342280000  | -1.920454000 |
| 1 | -0.720171000 | 1.641621000  | 1.380406000  | 6 | 5.171644000  | 1.395070000  | -1.075684000 |
| 6 | -0.953717000 | 2.008664000  | 3.481725000  | 6 | 5.812636000  | 0.848499000  | -2.192455000 |
| 1 | -0.887437000 | 2.837828000  | 4.176389000  | 6 | 6.946339000  | 1.472387000  | -2.694101000 |
| 1 | -1.925592000 | 1.544734000  | 3.600545000  | 6 | 7.456943000  | 2.605805000  | -2.097897000 |
| 1 | -0.191581000 | 1.283021000  | 3.738461000  | 6 | 6.842584000  | 3.122203000  | -0.975506000 |



|   |              |              |              |    |                                   |              |              |
|---|--------------|--------------|--------------|----|-----------------------------------|--------------|--------------|
| 6 | 5.704266000  | 2.530401000  | -0.449444000 | 1  | 4.720256000                       | -4.166505000 | -1.188226000 |
| 1 | 0.664367000  | 1.101772000  | -0.857503000 | 6  | 1.419984000                       | -3.733496000 | -2.206941000 |
| 1 | 2.199787000  | -5.858806000 | -0.122513000 | 1  | 0.606452000                       | -3.098294000 | -1.881808000 |
| 1 | 1.720643000  | -6.333276000 | 2.228894000  | 1  | 1.645364000                       | -3.511612000 | -3.246558000 |
| 1 | 1.615586000  | -4.500534000 | 3.845965000  | 1  | 1.108276000                       | -4.771239000 | -2.141222000 |
| 1 | -0.133691000 | -2.095294000 | 0.660508000  | 6  | 1.941499000                       | -1.847782000 | 3.441280000  |
| 1 | -0.731829000 | -0.545941000 | -0.176723000 | 1  | 1.944532000                       | -0.912445000 | 2.905899000  |
| 1 | 3.202383000  | 3.220815000  | -1.540564000 | 6  | 0.668116000                       | -1.914463000 | 4.310227000  |
| 1 | 3.147814000  | 2.079486000  | -2.871362000 | 1  | 0.655882000                       | -2.804849000 | 4.928681000  |
| 1 | 1.637181000  | 2.608894000  | -2.112143000 | 1  | 0.625722000                       | -1.053364000 | 4.970554000  |
| 1 | 7.439350000  | 1.061138000  | -3.552606000 | 1  | -0.219132000                      | -1.913737000 | 3.688548000  |
| 1 | 8.335886000  | 3.074982000  | -2.495514000 | 6  | 3.200747000                       | -1.890682000 | 4.335321000  |
| 1 | 7.257395000  | 3.988333000  | -0.499624000 | 1  | 4.092624000                       | -1.783449000 | 3.731971000  |
| 6 | 5.083212000  | 3.089468000  | 0.826892000  | 1  | 3.178609000                       | -1.081075000 | 5.058667000  |
| 1 | 4.141542000  | 2.589340000  | 0.983318000  | 1  | 3.256482000                       | -2.831512000 | 4.872572000  |
| 6 | 4.832007000  | 4.610436000  | 0.745280000  | 1  | 3.608291000                       | 0.499664000  | 1.946324000  |
| 1 | 4.317291000  | 4.945913000  | 1.640316000  | 32 | 4.210781000                       | -0.549993000 | 0.883593000  |
| 1 | 5.762180000  | 5.161810000  | 0.671380000  | 32 | -3.859257000                      | 0.467697000  | 0.727126000  |
| 1 | 4.219902000  | 4.861097000  | -0.114038000 |    |                                   |              |              |
| 6 | 5.990566000  | 2.760595000  | 2.033568000  |    | <i>Ge-inter-TS<sub>1,4'</sub></i> |              |              |
| 1 | 6.115975000  | 1.689596000  | 2.122786000  | 1  | -0.042551000                      | -0.198587000 | -0.574340000 |
| 1 | 6.966965000  | 3.217568000  | 1.914025000  | 1  | 1.029026000                       | 0.080855000  | -0.512417000 |
| 1 | 5.545417000  | 3.130055000  | 2.952359000  | 7  | 3.107641000                       | -1.421900000 | -0.306364000 |
| 6 | 5.318436000  | -0.438148000 | -2.841611000 | 6  | 2.917196000                       | -1.612268000 | 1.058152000  |
| 1 | 4.447301000  | -0.762836000 | -2.296451000 | 6  | 2.800085000                       | -0.588360000 | 1.943813000  |
| 6 | 4.927194000  | -0.220844000 | -4.319190000 | 6  | 3.048033000                       | 0.849219000  | 1.753389000  |
| 1 | 5.786153000  | 0.081673000  | -4.907604000 | 7  | 3.133126000                       | 1.322097000  | 0.436616000  |
| 1 | 4.536908000  | -1.141752000 | -4.741543000 | 6  | 3.456465000                       | 2.726284000  | 0.256980000  |
| 1 | 4.166053000  | 0.545464000  | -4.411272000 | 6  | 4.787344000                       | 3.136885000  | 0.115758000  |
| 6 | 6.394737000  | -1.539737000 | -2.724927000 | 6  | 5.067987000                       | 4.491141000  | -0.003583000 |
| 1 | 7.301398000  | -1.251086000 | -3.244739000 | 6  | 4.060673000                       | 5.431421000  | -0.007685000 |
| 1 | 6.632281000  | -1.717310000 | -1.683660000 | 6  | 2.748763000                       | 5.022406000  | 0.101716000  |
| 1 | 6.034732000  | -2.465640000 | -3.160084000 | 6  | 2.432107000                       | 3.679689000  | 0.239661000  |
| 6 | 2.661757000  | -3.483776000 | -1.323452000 | 6  | 3.183956000                       | 1.634092000  | 2.853204000  |
| 1 | 2.936297000  | -2.444686000 | -1.401946000 | 6  | 2.776157000                       | -3.032530000 | 1.557428000  |
| 6 | 3.850046000  | -4.339678000 | -1.809121000 | 6  | 3.710691000                       | -2.490230000 | -1.082709000 |
| 1 | 3.611175000  | -5.396875000 | -1.783568000 | 6  | 5.072771000                       | -2.794981000 | -0.926575000 |
| 1 | 4.099921000  | -4.079932000 | -2.832946000 | 6  | 5.621435000                       | -3.845066000 | -1.647241000 |

|   |              |              |              |   |              |              |              |
|---|--------------|--------------|--------------|---|--------------|--------------|--------------|
| 6 | 4.864225000  | -4.574003000 | -2.539234000 | 1 | 7.328921000  | 3.340347000  | -1.085477000 |
| 6 | 3.537844000  | -4.250752000 | -2.720821000 | 1 | 7.631440000  | 1.618589000  | -1.159325000 |
| 6 | 2.946074000  | -3.223230000 | -2.000677000 | 1 | 6.279690000  | 2.309941000  | -2.048533000 |
| 1 | 2.606633000  | -0.867063000 | 2.975037000  | 6 | 6.750918000  | 2.221376000  | 1.405138000  |
| 1 | 6.085428000  | 4.812884000  | -0.096527000 | 1 | 6.110293000  | 2.028387000  | 2.255585000  |
| 1 | 4.295602000  | 6.473613000  | -0.103883000 | 1 | 7.551680000  | 1.487632000  | 1.399270000  |
| 1 | 1.965589000  | 5.753316000  | 0.077535000  | 1 | 7.193614000  | 3.205490000  | 1.516839000  |
| 1 | 3.371162000  | 2.695786000  | 2.784930000  | 6 | 0.972619000  | 3.258778000  | 0.305803000  |
| 1 | 3.144484000  | 1.181555000  | 3.836506000  | 1 | 0.943044000  | 2.221507000  | 0.595540000  |
| 1 | 2.064937000  | -3.596276000 | 0.947076000  | 6 | 0.168355000  | 4.073344000  | 1.338463000  |
| 1 | 3.723233000  | -3.571340000 | 1.504501000  | 1 | 0.113921000  | 5.120568000  | 1.065379000  |
| 1 | 2.436353000  | -3.036200000 | 2.595662000  | 1 | -0.848502000 | 3.694792000  | 1.395586000  |
| 1 | 6.658204000  | -4.084412000 | -1.520912000 | 1 | 0.622077000  | 3.995525000  | 2.319408000  |
| 1 | 5.306880000  | -5.377439000 | -3.094643000 | 6 | 0.350079000  | 3.393138000  | -1.099767000 |
| 1 | 2.952699000  | -4.805557000 | -3.426934000 | 1 | 0.902138000  | 2.792954000  | -1.811868000 |
| 6 | 1.476629000  | -2.915205000 | -2.241862000 | 1 | -0.677398000 | 3.054081000  | -1.101037000 |
| 1 | 1.202012000  | -2.149867000 | -1.537337000 | 1 | 0.377643000  | 4.426277000  | -1.428462000 |
| 6 | 0.586789000  | -4.155948000 | -2.005600000 | 7 | -2.569359000 | -0.763647000 | 1.311292000  |
| 1 | -0.463369000 | -3.892943000 | -2.100085000 | 6 | -1.514896000 | -1.157839000 | 0.595592000  |
| 1 | 0.797633000  | -4.928117000 | -2.735179000 | 6 | -1.234650000 | -0.711379000 | -0.728752000 |
| 1 | 0.752978000  | -4.573661000 | -1.018893000 | 6 | -2.096905000 | 0.193279000  | -1.541803000 |
| 6 | 1.257288000  | -2.359739000 | -3.666356000 | 7 | -3.374931000 | 0.504662000  | -1.015450000 |
| 1 | 1.853562000  | -1.468930000 | -3.816891000 | 6 | -4.364649000 | 1.091318000  | -1.924552000 |
| 1 | 1.540280000  | -3.094660000 | -4.411099000 | 6 | -5.117359000 | 0.237139000  | -2.739298000 |
| 1 | 0.212024000  | -2.106674000 | -3.820997000 | 6 | -6.091668000 | 0.788843000  | -3.555207000 |
| 6 | 5.990845000  | -1.970095000 | -0.029977000 | 6 | -6.321126000 | 2.150015000  | -3.563745000 |
| 1 | 5.405370000  | -1.189861000 | 0.427274000  | 6 | -5.572293000 | 2.980476000  | -2.758419000 |
| 6 | 6.638066000  | -2.817461000 | 1.087117000  | 6 | -4.579225000 | 2.470930000  | -1.931923000 |
| 1 | 7.267361000  | -3.594554000 | 0.668265000  | 6 | -1.649702000 | 0.652641000  | -2.720175000 |
| 1 | 7.256065000  | -2.186280000 | 1.717154000  | 6 | -0.445014000 | -1.984032000 | 1.212124000  |
| 1 | 5.889234000  | -3.285739000 | 1.712488000  | 6 | -2.775633000 | -1.208675000 | 2.696005000  |
| 6 | 7.094993000  | -1.308441000 | -0.883526000 | 6 | -3.475294000 | -2.396773000 | 2.930717000  |
| 1 | 7.733843000  | -2.058005000 | -1.335813000 | 6 | -3.707236000 | -2.767039000 | 4.246635000  |
| 1 | 6.659599000  | -0.708941000 | -1.672763000 | 6 | -3.271664000 | -1.979811000 | 5.292799000  |
| 1 | 7.712253000  | -0.668815000 | -0.262700000 | 6 | -2.597921000 | -0.803778000 | 5.040340000  |
| 6 | 5.937414000  | 2.139777000  | 0.094979000  | 6 | -2.337731000 | -0.394526000 | 3.739999000  |
| 1 | 5.506683000  | 1.155004000  | 0.022096000  | 1 | -0.832245000 | -1.526074000 | -1.329667000 |
| 6 | 6.850889000  | 2.369173000  | -1.129134000 | 1 | -6.678935000 | 0.151244000  | -4.184583000 |

|   |              |              |              |    |                                  |              |              |
|---|--------------|--------------|--------------|----|----------------------------------|--------------|--------------|
| 1 | -7.082405000 | 2.560944000  | -4.196911000 | 1  | -2.301952000                     | -4.654872000 | 1.821006000  |
| 1 | -5.758564000 | 4.034785000  | -2.771565000 | 1  | -3.666658000                     | -5.203313000 | 2.780308000  |
| 1 | -2.249831000 | 1.288753000  | -3.355788000 | 6  | -1.617758000                     | 0.927650000  | 3.494657000  |
| 1 | -0.644862000 | 0.399074000  | -3.039699000 | 1  | -1.365255000                     | 0.995428000  | 2.447212000  |
| 1 | -0.779920000 | -2.576594000 | 2.059669000  | 6  | -2.557483000                     | 2.106020000  | 3.837757000  |
| 1 | 0.028684000  | -2.619401000 | 0.463607000  | 1  | -2.059857000                     | 3.049209000  | 3.644998000  |
| 1 | 0.339934000  | -1.287322000 | 1.556670000  | 1  | -3.464438000                     | 2.066945000  | 3.243418000  |
| 1 | -4.236514000 | -3.674392000 | 4.454758000  | 1  | -2.839829000                     | 2.074147000  | 4.883434000  |
| 1 | -3.462081000 | -2.281126000 | 6.303634000  | 6  | -0.306447000                     | 1.023714000  | 4.301802000  |
| 1 | -2.270814000 | -0.196466000 | 5.858719000  | 1  | -0.505790000                     | 1.098736000  | 5.364329000  |
| 6 | -4.903331000 | -1.273916000 | -2.744984000 | 1  | 0.319811000                      | 0.158692000  | 4.126000000  |
| 1 | -4.097097000 | -1.502320000 | -2.066591000 | 1  | 0.253044000                      | 1.897588000  | 3.995417000  |
| 6 | -3.772098000 | 3.421278000  | -1.054024000 | 32 | -4.096967000                     | 0.126096000  | 0.609253000  |
| 1 | -2.961186000 | 2.862178000  | -0.613988000 | 32 | 2.688969000                      | 0.290297000  | -1.096575000 |
| 6 | -4.492916000 | -1.774454000 | -4.145743000 |    |                                  |              |              |
| 1 | -5.277860000 | -1.591481000 | -4.869698000 |    | <i>Ge-inter-IM<sub>1A'</sub></i> |              |              |
| 1 | -3.592282000 | -1.272490000 | -4.475645000 | 1  | -1.024498000                     | 0.872077000  | -0.643566000 |
| 1 | -4.302276000 | -2.842373000 | -4.118080000 | 1  | 1.372470000                      | 0.283277000  | -0.669466000 |
| 6 | -6.169642000 | -2.005770000 | -2.247543000 | 7  | 3.165878000                      | -1.437507000 | -0.477391000 |
| 1 | -5.994718000 | -3.076221000 | -2.211231000 | 6  | 2.935440000                      | -1.694234000 | 0.856929000  |
| 1 | -6.445111000 | -1.667187000 | -1.254443000 | 6  | 2.857544000                      | -0.717533000 | 1.810668000  |
| 1 | -7.007535000 | -1.823183000 | -2.909235000 | 6  | 3.262149000                      | 0.694971000  | 1.739313000  |
| 6 | -3.159291000 | 4.574343000  | -1.876915000 | 7  | 3.453736000                      | 1.245340000  | 0.477885000  |
| 1 | -3.929832000 | 5.215216000  | -2.288009000 | 6  | 3.826378000                      | 2.638273000  | 0.390091000  |
| 1 | -2.523208000 | 5.179828000  | -1.241405000 | 6  | 5.165582000                      | 3.006856000  | 0.217826000  |
| 1 | -2.557929000 | 4.189380000  | -2.690697000 | 6  | 5.494708000                      | 4.352967000  | 0.143104000  |
| 6 | -4.654666000 | 3.987428000  | 0.081461000  | 6  | 4.524600000                      | 5.330058000  | 0.217382000  |
| 1 | -5.078459000 | 3.190724000  | 0.682859000  | 6  | 3.202698000                      | 4.965773000  | 0.365375000  |
| 1 | -4.068085000 | 4.631687000  | 0.727957000  | 6  | 2.839589000                      | 3.630854000  | 0.456670000  |
| 1 | -5.473123000 | 4.568429000  | -0.327422000 | 6  | 3.445983000                      | 1.364897000  | 2.912573000  |
| 6 | -4.002600000 | -3.285042000 | 1.804436000  | 6  | 2.663009000                      | -3.125388000 | 1.264994000  |
| 1 | -3.727316000 | -2.846802000 | 0.856254000  | 6  | 3.683096000                      | -2.496497000 | -1.314234000 |
| 6 | -5.545075000 | -3.370552000 | 1.854129000  | 6  | 5.014580000                      | -2.920832000 | -1.181741000 |
| 1 | -5.874200000 | -3.845941000 | 2.769814000  | 6  | 5.475945000                      | -3.969376000 | -1.962929000 |
| 1 | -5.988919000 | -2.383144000 | 1.806634000  | 6  | 4.660493000                      | -4.581253000 | -2.891963000 |
| 1 | -5.912608000 | -3.954996000 | 1.017614000  | 6  | 3.367757000                      | -4.133111000 | -3.056407000 |
| 6 | -3.383296000 | -4.698609000 | 1.864906000  | 6  | 2.865287000                      | -3.099227000 | -2.279764000 |
| 1 | -3.735689000 | -5.293289000 | 1.029208000  | 1  | 2.626261000                      | -1.056066000 | 2.815686000  |

|   |              |              |              |   |              |              |              |
|---|--------------|--------------|--------------|---|--------------|--------------|--------------|
| 1 | 6.519862000  | 4.640287000  | 0.023304000  | 1 | 6.407867000  | 1.676621000  | 2.271298000  |
| 1 | 4.795868000  | 6.366095000  | 0.154373000  | 1 | 7.830214000  | 1.129562000  | 1.387229000  |
| 1 | 2.448328000  | 5.726719000  | 0.408720000  | 1 | 7.554536000  | 2.850881000  | 1.628218000  |
| 1 | 3.761757000  | 2.397863000  | 2.941248000  | 6 | 1.367631000  | 3.263537000  | 0.598750000  |
| 1 | 3.329141000  | 0.837943000  | 3.851657000  | 1 | 1.316150000  | 2.202261000  | 0.774541000  |
| 1 | 1.876654000  | -3.564633000 | 0.642156000  | 6 | 0.705563000  | 3.990226000  | 1.787325000  |
| 1 | 3.544299000  | -3.756128000 | 1.139713000  | 1 | 0.692508000  | 5.063713000  | 1.639039000  |
| 1 | 2.357384000  | -3.170929000 | 2.312960000  | 1 | -0.324587000 | 3.660018000  | 1.903005000  |
| 1 | 6.489855000  | -4.299927000 | -1.855159000 | 1 | 1.243160000  | 3.772427000  | 2.701467000  |
| 1 | 5.034485000  | -5.387380000 | -3.492457000 | 6 | 0.619621000  | 3.571605000  | -0.716439000 |
| 1 | 2.741991000  | -4.591760000 | -3.796522000 | 1 | 1.052516000  | 3.006380000  | -1.532304000 |
| 6 | 1.438944000  | -2.623227000 | -2.517674000 | 1 | -0.431670000 | 3.305664000  | -0.629279000 |
| 1 | 1.235606000  | -1.870199000 | -1.774642000 | 1 | 0.680457000  | 4.627319000  | -0.956271000 |
| 6 | 0.416462000  | -3.772021000 | -2.369785000 | 7 | -2.525564000 | -0.647340000 | 1.244096000  |
| 1 | -0.598478000 | -3.392947000 | -2.464150000 | 6 | -1.493636000 | -0.829616000 | 0.464427000  |
| 1 | 0.559656000  | -4.519759000 | -3.140414000 | 6 | -1.434846000 | -0.130800000 | -0.859201000 |
| 1 | 0.517144000  | -4.263019000 | -1.407733000 | 6 | -2.719048000 | -0.011164000 | -1.636835000 |
| 6 | 1.311644000  | -1.965751000 | -3.909583000 | 7 | -3.801466000 | 0.544863000  | -0.921916000 |
| 1 | 1.994171000  | -1.130063000 | -3.990441000 | 6 | -4.884096000 | 1.187994000  | -1.671100000 |
| 1 | 1.538162000  | -2.678959000 | -4.693787000 | 6 | -6.048316000 | 0.475534000  | -1.972406000 |
| 1 | 0.300265000  | -1.600676000 | -4.068864000 | 6 | -7.063632000 | 1.130785000  | -2.656498000 |
| 6 | 5.988083000  | -2.212000000 | -0.245758000 | 6 | -6.929560000 | 2.449437000  | -3.033033000 |
| 1 | 5.454732000  | -1.419232000 | 0.252133000  | 6 | -5.773109000 | 3.139671000  | -2.731749000 |
| 6 | 6.573671000  | -3.161120000 | 0.821682000  | 6 | -4.733531000 | 2.526656000  | -2.051101000 |
| 1 | 7.146870000  | -3.957548000 | 0.360026000  | 6 | -2.772936000 | -0.346705000 | -2.930525000 |
| 1 | 7.233851000  | -2.610353000 | 1.483686000  | 6 | -0.313327000 | -1.613912000 | 0.833150000  |
| 1 | 5.791417000  | -3.607732000 | 1.422501000  | 6 | -2.640708000 | -1.291264000 | 2.565786000  |
| 6 | 7.131334000  | -1.575953000 | -1.066866000 | 6 | -3.274800000 | -2.532743000 | 2.647846000  |
| 1 | 7.715970000  | -2.337427000 | -1.570575000 | 6 | -3.411749000 | -3.106239000 | 3.902683000  |
| 1 | 6.730736000  | -0.900563000 | -1.812202000 | 6 | -2.954428000 | -2.458267000 | 5.031891000  |
| 1 | 7.793068000  | -1.017526000 | -0.413568000 | 6 | -2.353224000 | -1.221842000 | 4.927807000  |
| 6 | 6.262186000  | 1.955545000  | 0.124043000  | 6 | -2.183486000 | -0.609933000 | 3.693836000  |
| 1 | 5.774053000  | 1.006097000  | -0.019579000 | 1 | -0.671155000 | -0.610125000 | -1.470467000 |
| 6 | 7.198350000  | 2.212303000  | -1.075819000 | 1 | -7.965021000 | 0.604218000  | -2.895275000 |
| 1 | 7.748874000  | 3.138418000  | -0.956936000 | 1 | -7.723926000 | 2.939480000  | -3.560124000 |
| 1 | 7.920496000  | 1.408351000  | -1.161775000 | 1 | -5.678272000 | 4.164421000  | -3.027683000 |
| 1 | 6.630233000  | 2.264240000  | -1.997301000 | 1 | -3.667136000 | -0.191485000 | -3.519846000 |
| 6 | 7.066072000  | 1.899868000  | 1.441636000  | 1 | -1.894921000 | -0.744417000 | -3.423511000 |

|   |              |              |              |    |              |              |              |
|---|--------------|--------------|--------------|----|--------------|--------------|--------------|
| 1 | -0.375187000 | -2.082433000 | 1.812050000  | 6  | -2.349309000 | 1.822266000  | 4.363799000  |
| 1 | -0.113483000 | -2.353890000 | 0.052485000  | 1  | -1.878130000 | 2.793588000  | 4.265343000  |
| 1 | 0.565945000  | -0.933693000 | 0.789085000  | 1  | -3.354006000 | 1.882499000  | 3.960376000  |
| 1 | -3.880294000 | -4.063968000 | 3.997755000  | 1  | -2.421097000 | 1.587601000  | 5.418810000  |
| 1 | -3.069505000 | -2.916718000 | 5.993683000  | 6  | -0.077799000 | 0.696428000  | 4.198841000  |
| 1 | -2.006230000 | -0.727009000 | 5.811053000  | 1  | -0.101070000 | 0.475662000  | 5.259571000  |
| 6 | -6.248841000 | -0.983763000 | -1.573596000 | 1  | 0.512341000  | -0.058439000 | 3.698658000  |
| 1 | -5.340853000 | -1.337376000 | -1.108704000 | 1  | 0.424391000  | 1.643690000  | 4.056007000  |
| 6 | -3.473033000 | 3.324502000  | -1.736682000 | 32 | 2.913558000  | 0.383982000  | -1.163062000 |
| 1 | -2.777756000 | 2.673602000  | -1.233091000 | 32 | -4.046122000 | 0.506171000  | 0.878487000  |
| 6 | -6.518209000 | -1.875594000 | -2.804995000 |    |              |              |              |
| 1 | -7.442937000 | -1.595118000 | -3.293879000 |    |              |              |              |
| 1 | -5.711869000 | -1.796119000 | -3.523131000 |    |              |              |              |
| 1 | -6.601864000 | -2.912920000 | -2.498564000 |    |              |              |              |
| 6 | -7.405311000 | -1.109488000 | -0.556061000 |    |              |              |              |
| 1 | -7.532549000 | -2.143086000 | -0.254688000 |    |              |              |              |
| 1 | -7.211628000 | -0.512828000 | 0.328749000  |    |              |              |              |
| 1 | -8.335892000 | -0.767868000 | -0.992134000 |    |              |              |              |
| 6 | -2.795576000 | 3.827568000  | -3.029255000 |    |              |              |              |
| 1 | -3.437082000 | 4.521347000  | -3.559371000 |    |              |              |              |
| 1 | -1.870851000 | 4.338561000  | -2.787280000 |    |              |              |              |
| 1 | -2.565812000 | 2.997909000  | -3.686285000 |    |              |              |              |
| 6 | -3.791278000 | 4.500833000  | -0.787346000 |    |              |              |              |
| 1 | -4.254152000 | 4.146062000  | 0.127529000  |    |              |              |              |
| 1 | -2.878855000 | 5.027098000  | -0.529508000 |    |              |              |              |
| 1 | -4.467886000 | 5.204847000  | -1.256592000 |    |              |              |              |
| 6 | -3.803797000 | -3.271635000 | 1.420566000  |    |              |              |              |
| 1 | -3.729053000 | -2.618029000 | 0.563493000  |    |              |              |              |
| 6 | -5.291346000 | -3.648917000 | 1.592770000  |    |              |              |              |
| 1 | -5.420732000 | -4.371895000 | 2.388055000  |    |              |              |              |
| 1 | -5.889345000 | -2.775948000 | 1.825716000  |    |              |              |              |
| 1 | -5.666507000 | -4.090813000 | 0.676204000  |    |              |              |              |
| 6 | -2.959553000 | -4.533852000 | 1.136234000  |    |              |              |              |
| 1 | -3.322446000 | -5.032933000 | 0.244480000  |    |              |              |              |
| 1 | -1.916500000 | -4.284361000 | 0.987665000  |    |              |              |              |
| 1 | -3.027233000 | -5.227322000 | 1.965820000  |    |              |              |              |
| 6 | -1.508929000 | 0.757838000  | 3.623213000  |    |              |              |              |
| 1 | -1.431233000 | 1.058518000  | 2.588033000  |    |              |              |              |
